# Supplementary material for: Non-canonical Hedgehog signaling regulates spinal cord and muscle regeneration in Xenopus laevis larvae
Source: eLife. 2021 May 6;10:e61804. doi: 10.7554/eLife.61804 (PMC8137141; doi:10.7554/eLife.61804)
Supplement: Figure 1—figure supplement 1—source data 1. [file elife-61804-fig1-figsupp1-data1.xlsx]

## Sheet: 72h treatment
raw values	12/101 volume	2020-11-10 DMSO	2020-11-10 20 uM vismo			normalized to sample set matched control	12/101 volume	2020-11-10 DMSO	2020-11-10 20 uM vismo			combined stats
	1		78768.6				1	0	17.5288				DMSO	20 uM vismo
	2	448600					2	99.8291	0				99.8291	17.5288
	3	668979	121740				3	148.871	27.0914				148.871	27.0914
	4	409023	87068.6				4	91.0219	19.3758				91.0219	19.3758
	5	394416					5	87.7713	0				87.7713	19.3355
	6	540119	86887.6				6	120.195	19.3355				120.195	26.3402
	7	423109	118364				7	94.1566	26.3402				94.1566	15.4578
	8	473322	69462.5				8	105.331	15.4578				105.331	21.9402
	9	439118	98592.3				9	97.7192	21.9402				97.7192	13.6937
	10	247622	61535.1				10	55.1045	13.6937				55.1045
	11						11	0	0
	12						12	0	0
	13						13	0	0
	14						14	0	0
	15						15	0	0
	16						16	0	0
	17						17	0	0
	18						18	0	0
	19						19	0	0
	20						20	0	0
												average	100	20.0954
												S ERROR	8.42433	1.6983
												N	9	8
raw values	SC regen length	2020-11-10 DMSO	2020-11-10 20 uM vismo				SC regen length	2020-11-10 DMSO	2020-11-10 20 uM vismo				DMSO	20 uM vismo
	1	711.377	650.262				1	95.0476	86.8819				95.0476	86.8819
	2	750.728					2	100.305	0				100.305	75.5842
	3	791.74	565.705				3	105.785	75.5842				105.785	90.8586
	4	737.107	680.025				4	98.4854	90.8586				98.4854	95.5436
	5		715.09				5	0	95.5436				105.713	93.9413
	6	791.205	703.097				6	105.713	93.9413				101.902	100.946
	7	762.677	755.526				7	101.902	100.946				105.701	102.112
	8	791.115					8	105.701	0				100.3	99.8588
	9	750.691	764.247				9	100.3	102.112				86.76
	10	649.35	747.387				10	86.76	99.8588
	11						11	0	0
	12						12	0	0
	13						13	0	0
	14						14	0	0
	15						15	0	0
	16						16	0	0
	17						17	0	0
	18						18	0	0
	19						19	0	0
	20						20	0	0
	21
	22
	23
	24
	25
												average	100	93.2158
												S ERROR	2.0566	3.12112
												N	7	6
raw values	muscle regen length	2020-11-10 DMSO	2020-11-10 20 uM vismo				muscle regen length	2020-11-10 DMSO	2020-11-10 20 uM vismo				DMSO	20 uM vismo
	1	332.145	114.282				1	79.9555	27.5105				79.9555	27.5105
	2	369.086					2	88.8481	0				88.8481	21.0997
	3	475.03	87.6506				3	114.351	21.0997				114.351	33.5659
	4	400.369	139.437				4	96.3787	33.5659				96.3787	7.22174
	5	363.794					5	87.5742	0				87.5742	32.4184
	6	434.813	30				6	104.67	7.22174				104.67	4.53643
	7	445.675	134.67				7	107.285	32.4184				107.285	11.6098
	8	502.918	18.8449				8	121.065	4.53643				121.065	20.5128
	9	478.139	48.2287				9	115.1	11.6098				115.1
	10	352.155	85.2127				10	84.7723	20.5128				84.7723
	11						11	0	0
	12						12	0	0
	13						13	0	0
	14						14	0	0
	15						15	0	0
	16						16	0	0
	17						17	0	0
	18						18	0	0
	19						19	0	0
	20						20	0	0
												average	100	19.8094
												S ERROR	4.56815	3.93846
												N	10	8
raw values	Sox2 in regen SC	2020-11-10 DMSO	2020-11-10 20 uM vismo				Sox2 in regen SC	2020-11-10 DMSO	2020-11-10 20 uM vismo				DMSO	20 uM vismo
	1		417				1	0	62.0536				108.631	62.0536
	2	730					2	108.631	0				107.589	73.6607
	3	723	495				3	107.589	73.6607				105.208	80.9524
	4	707	544				4	105.208	80.9524				90.1786	90.625
	5	606	609				5	90.1786	90.625				108.78	64.1369
	6	731	431				6	108.78	64.1369				99.7024	61.9048
	7	670	416				7	99.7024	61.9048				100	91.8155
	8	672	617				8	100	91.8155				92.4107	83.631
	9	621	562				9	92.4107	83.631				87.5	62.7976
	10	588	422				10	87.5	62.7976
	11						11	0	0
	12						12	0	0
	13						13	0	0
	14						14	0	0
	15						15	0	0
	16						16	0	0
	17						17	0	0
	18						18	0	0
	19						19	0	0
	20						20	0	0
												average	100	74.6197
												S ERROR	2.75554	4.15551
												N	9	9
raw values	P-H3 in regen tail	2020-11-10 DMSO	2020-11-10 20 uM vismo				P-H3 in regen tail	2020-11-10 DMSO	2020-11-10 20 uM vismo				DMSO	20 uM vismo
	1	130	77				1	95.0447	56.2957				95.0447	56.2957
	2	152					2	111.129	0				111.129	63.6068
	3	135					3	98.7002	0				98.7002	67.9935
	4		87				4	0	63.6068				89.1958	79.6913
	5	122	93				5	89.1958	67.9935				104.549	58.489
	6	143	109				6	104.549	79.6913				105.28	87.0024
	7	144	80				7	105.28	58.489				95.7758	88.4647
	8	131	119				8	95.7758	87.0024				110.398	69.4557
	9	151	121				9	110.398	88.4647				89.9269
	10	123	95				10	89.9269	69.4557
	11						11	0	0
	12						12	0	0
	13						13	0	0
	14						14	0	0
	15						15	0	0
	16						16	0	0
	17						17	0	0
	18						18	0	0
	19						19	0	0
	20						20	0	0
												average	100	71.3749
												S ERROR	2.74581	4.38001
												N	5	4
