# Supplementary material for: Non-canonical Hedgehog signaling regulates spinal cord and muscle regeneration in Xenopus laevis larvae
Source: eLife. 2021 May 6;10:e61804. doi: 10.7554/eLife.61804 (PMC8137141; doi:10.7554/eLife.61804)
Supplement: Figure 1—source data 1. [file elife-61804-fig1-data1.xlsx]

## Sheet: 24h vs 72h cyc
raw values	12/101 volume	6-2-14 DMSO 24 hrs	6-2-14 cyc 24 hrs	6-2-14 cyc 72 hrs	12-19-18 DMSO 24 hrs	12-19-18 cyc 24 hrs	12-19-18 cyc 72 hrs	3-11-19 DMSO 24 hrs	3-11-19 cyc 24 hrs	3-11-19 cyc 72 hrs	5-13-19 DMSO 24 hrs	5-13-19 cyc 24 hrs	5-13-19 cyc 72 hrs		normalized to sample set matched control	12/101 volume	6-2-14 DMSO 24 hrs	6-2-14 cyc 24 hrs	6-2-14 cyc 72 hrs	12-19-18 DMSO 24 hrs	12-19-18 cyc 24 hrs	12-19-18 cyc 72 hrs	3-11-19 DMSO 24 hrs	3-11-19 cyc 24 hrs	3-11-19 cyc 72 hrs	5-13-19 DMSO 24 hrs	5-13-19 cyc 24 hrs	5-13-19 cyc 72 hrs			combined stats
	1	511581	160545		742627	114307	104141	780953	215513	187784	666224	256193	292242			1	69.4112	21.7828	0	136.512	21.0124	19.1436	104.623	28.872	25.1572	117.604	45.2241	51.5877				DMSO	cyc 24 hrs	cyc 72 hrs
	2	575523	266255	172506	669534	179099	49986.7	647132		137623	751389	177740	314544			2	78.0868	36.1255	23.4055	123.076	32.9226	9.18872	86.6955	0	18.4372	132.638	31.3753	55.5245				69.4112	21.7828	23.4055
	3		215066	136027	577598		91312.7	377848	300055	113475	652799	332208	331013			3	0	29.1801	18.4561	106.176	0	16.7854	50.6198	40.198	15.2021	115.235	58.6426	58.4317				78.0868	36.1255	18.4561
	4	1.26238e+06	107166	171436		213613	107899	1.10154e+06	329732		303495	254085				4	171.279	14.5402	23.2605	0	39.267	19.8343	147.572	44.1737	0	53.5741	44.8521	0				171.279	29.1801	23.2605
	5	774388	136726	212517	656644	55457.7		822175	255715	196168	734337	346459	258090			5	105.069	18.5509	28.8343	120.707	10.1944	0	110.146	34.2578	26.2804	129.628	61.1583	45.5591				105.069	14.5402	28.8343
	6	728932	132549		371798	233412	72163.7		410422	126435	661318	284916	357885			6	98.9014	17.9843	0	68.3452	42.9066	13.2654	0	54.9836	16.9383	116.738	50.2944	63.1752				98.9014	18.5509	29.1434
	7	608967	190664	214796	393638	98638.1	53415.9	344561	356206	216909		157926	250523			7	82.6245	25.8692	29.1434	72.3599	18.132	9.81908	46.1603	47.7204	29.059	0	27.8778	44.2233				82.6245	17.9843	19.5783
	8	649242	242517	144297	733671	107837	91759.4	736294	431924	149247	418138		291882			8	88.089	32.9046	19.5783	134.866	19.823	16.8675	98.6403	57.8643	19.9944	73.8114	0	51.5241				88.089	25.8692	19.0337
	9	785222		140284	544603	227068	51151.4	546215	307304	86922	344267	262450				9	106.539	0	19.0337	100.111	41.7403	9.40282	73.1757	41.1691	11.6448	60.7713	46.3287	0				106.539	32.9046	19.1436
	10				205890	141398	43921.8	771867	398201							10	0	0	0	37.8475	25.9923	8.07385	103.406	53.3464	0	0	0	0				136.512	21.0124	9.18872
	11							684948	465843							11	0	0	0	0	0	0	91.7616	62.4084	0	0	0	0				123.076	32.9226	16.7854
	12							816022								12	0	0	0	0	0	0	109.321	0	0	0	0	0				106.176	39.267	19.8343
	13							1.01271e+06								13	0	0	0	0	0	0	135.672	0	0	0	0	0				120.707	10.1944	13.2654
	14							951611								14	0	0	0	0	0	0	127.486	0	0	0	0	0				68.3452	42.9066	9.81908
	15															15	0	0	0	0	0	0	0	0	0	0	0	0				72.3599	18.132	16.8675
	16							792068								16	0	0	0	0	0	0	106.112	0	0	0	0	0				134.866	19.823	9.40282
	17							901679								17	0	0	0	0	0	0	120.797	0	0	0	0	0				100.111	41.7403	8.07385
	18							655467								18	0	0	0	0	0	0	87.8121	0	0	0	0	0				37.8475	25.9923	25.1572
	19															19	0	0	0	0	0	0	0	0	0	0	0	0				104.623	28.872	18.4372
	20															20	0	0	0	0	0	0	0	0	0	0	0	0				86.6955	40.198	15.2021
																																50.6198	44.1737	26.2804
																																147.572	34.2578	16.9383
																																110.146	54.9836	29.059
																																46.1603	47.7204	19.9944
																																98.6403	57.8643	11.6448
																																73.1757	41.1691	51.5877
																																103.406	53.3464	55.5245
																																91.7616	62.4084	58.4317
																																109.321	45.2241	45.5591
																																135.672	31.3753	63.1752
																																127.486	58.6426	44.2233
																																106.112	44.8521	51.5241
																																120.797	61.1583
																																87.8121	50.2944
																																117.604	27.8778
																																132.638	46.3287
																																115.235
																																53.5741
																																129.628
																																116.738
																																73.8114
																																60.7713
																															average	100	36.5622	26.3494
																															S ERROR	4.60435	2.41813	2.85234
																															N	41	35	31
raw values	SC regen length	6-2-14 DMSO 24 hrs	6-2-14 cyc 24 hrs	6-2-14 cyc 72 hrs	12-19-18 DMSO 24 hrs	12-19-18 cyc 24 hrs	12-19-18 cyc 72 hrs	3-11-19 DMSO 24 hrs	3-11-19 cyc 24 hrs	3-11-19 cyc 72 hrs	5-13-19 DMSO 24 hrs	5-13-19 cyc 24 hrs	5-13-19 cyc 72 hrs			SC regen length	6-2-14 DMSO 24 hrs	6-2-14 cyc 24 hrs	6-2-14 cyc 72 hrs	12-19-18 DMSO 24 hrs	12-19-18 cyc 24 hrs	12-19-18 cyc 72 hrs	3-11-19 DMSO 24 hrs	3-11-19 cyc 24 hrs	3-11-19 cyc 72 hrs	5-13-19 DMSO 24 hrs	5-13-19 cyc 24 hrs	5-13-19 cyc 72 hrs				DMSO	cyc 24 hrs	cyc 72 hrs
	1	639.609	477.421	590.901	1032.99	937.024	653.461	983.74	886.686	926.592	838.921	637.324	598.978			1	99.5731	74.324	91.9903	115.596	104.857	73.1254	109.65	98.8319	103.28	107.125	81.3819	76.4854				99.5731	74.324	91.9903
	2		541.927	541.032	976.418	839.764	899.747	782.017	857.624	872.468	762.656	669.25	550.576			2	0	84.3662	84.2269	109.266	93.9736	100.686	87.1652	95.5926	97.2471	97.3861	85.4587	70.3048				89.5273	84.3662	84.2269
	3	575.079		591.666	862.656	952.43	772.09	670.236	986.405		862.884	754.64	618.487			3	89.5273	0	92.1094	96.5353	106.581	86.4006	74.7059	109.947	0	110.184	96.3624	78.9766				110.183	79.7993	92.1094
	4	707.761	512.592		714.824	624.143	611.076	1112.09	964.721	795.984		616.108	549.515			4	110.183	79.7993	0	79.9923	69.8446	68.3824	123.956	107.53	88.7221	0	78.6729	70.1694				105.545	89.1273	83.6265
	5	677.972	572.51	537.176	902.224	720.862	720.801	837.175	901.687	903.413	800.765	744.812	696.298			5	105.545	89.1273	83.6265	100.963	80.6679	80.6611	93.3133	100.504	100.696	102.252	95.1074	88.9125				101.821	69.5709	86.5645
	6	654.05	446.89	556.048	780.996	807.251	650.961		800.841	834.755	745.35	760.41	543.797			6	101.821	69.5709	86.5645	87.3972	90.3353	72.8457	0	89.2634	93.0435	95.1761	97.0992	69.4392				99.6935	91.7745	84.6713
	7	640.382	589.515	543.887	961.354	508.832	749.976	689.123	814.983	862.079	822.135	736.669	666.728			7	99.6935	91.7745	84.6713	107.58	56.9407	83.9259	76.8111	90.8397	96.0891	104.981	94.0676	85.1366				87.5759	80.511	96.2618
	8	562.545	517.163	618.339	811.99	804.769	904.976	949.475	895.632	927.285	770.318		679.953			8	87.5759	80.511	96.2618	90.8656	90.0575	101.271	105.831	99.829	103.357	98.3644	0	86.8253				106.081	91.4215	88.6451
	9	681.411	587.247	569.413	999.102	608.71	565.057	765.366	898.362	931.49	661.986	728.434				9	106.081	91.4215	88.6451	111.804	68.1176	63.2326	85.3093	100.133	103.826	84.5311	93.016	0				115.596	104.857	73.1254
	10					579.514	739.674	747.017	870.081	897.746						10	0	0	0	0	64.8503	82.7731	83.2641	96.9811	100.065	0	0	0				109.266	93.9736	100.686
	11							1018.31								11	0	0	0	0	0	0	113.503	0	0	0	0	0				96.5353	106.581	86.4006
	12							977.943								12	0	0	0	0	0	0	109.004	0	0	0	0	0				79.9923	69.8446	68.3824
	13							1086.57								13	0	0	0	0	0	0	121.111	0	0	0	0	0				100.963	80.6679	80.6611
	14							932.058								14	0	0	0	0	0	0	103.889	0	0	0	0	0				87.3972	90.3353	72.8457
	15							1035.08								15	0	0	0	0	0	0	115.372	0	0	0	0	0				107.58	56.9407	83.9259
	16							897.921								16	0	0	0	0	0	0	100.084	0	0	0	0	0				90.8656	90.0575	101.271
	17							915.811								17	0	0	0	0	0	0	102.078	0	0	0	0	0				111.804	68.1176	63.2326
	18							851.896								18	0	0	0	0	0	0	94.9541	0	0	0	0	0				109.65	64.8503	82.7731
	19															19	0	0	0	0	0	0	0	0	0	0	0	0				87.1652	98.8319	103.28
	20															20	0	0	0	0	0	0	0	0	0	0	0	0				74.7059	95.5926	97.2471
	21															21																123.956	109.947	88.7221
	22															22																93.3133	107.53	100.696
	23															23																76.8111	100.504	93.0435
	24															24																105.831	89.2634	96.0891
	25															25																85.3093	90.8397	103.357
																																83.2641	99.829	103.826
																																113.503	100.133	100.065
																																109.004	96.9811	76.4854
																																121.111	81.3819	70.3048
																																103.889	85.4587	78.9766
																																115.372	96.3624	70.1694
																																100.084	78.6729	88.9125
																																102.078	95.1074	69.4392
																																94.9541	97.0992	85.1366
																																107.125	94.0676	86.8253
																																97.3861	93.016
																																110.184
																																102.252
																																95.1761
																																104.981
																																98.3644
																																84.5311
																															average	100	88.8261	86.685
																															S ERROR	1.81154	2.10711	1.91795
																															N	40	34	33
raw values	muscle regen length	6-2-14 DMSO 24 hrs	6-2-14 cyc 24 hrs	6-2-14 cyc 72 hrs	12-19-18 DMSO 24 hrs	12-19-18 cyc 24 hrs	12-19-18 cyc 72 hrs	3-11-19 DMSO 24 hrs	3-11-19 cyc 24 hrs	3-11-19 cyc 72 hrs	5-13-19 DMSO 24 hrs	5-13-19 cyc 24 hrs	5-13-19 cyc 72 hrs			muscle regen length	6-2-14 DMSO 24 hrs	6-2-14 cyc 24 hrs	6-2-14 cyc 72 hrs	12-19-18 DMSO 24 hrs	12-19-18 cyc 24 hrs	12-19-18 cyc 72 hrs	3-11-19 DMSO 24 hrs	3-11-19 cyc 24 hrs	3-11-19 cyc 72 hrs	5-13-19 DMSO 24 hrs	5-13-19 cyc 24 hrs	5-13-19 cyc 72 hrs				DMSO	cyc 24 hrs	cyc 72 hrs
	1	342.446	52.4996	107.667	700.146	145.08	75.5298	653.978	339.757	216.874	578.951	360.656				1	103.011	15.7924	32.3874	124.968	25.8951	13.4812	99.1707	51.5215	32.8873	119.699	74.5659	0				103.011	15.7924	32.3874
	2	324.779	92.0026	98.8526	660.692	252.514	77.1764	616.689	347.074	86.6246	470.155	325.937	72.6146			2	97.697	27.6754	29.7359	117.926	45.0708	13.7751	93.5161	52.6311	13.136	97.2049	67.3878	15.0131				97.697	27.6754	29.7359
	3	359.188	89.8649	69.8373	582.985		92.7353			103.871	598.07	352.26	49.4599			3	108.048	27.0323	21.0078	104.056	0	16.5522	0	0	15.7512	123.651	72.8301	10.2259				108.048	27.0323	21.0078
	4	341.584	93.7576	117.328		107.8	124.723	802.808	210.486		394.256	356.201	62.9132			4	102.752	28.2033	35.2935	0	19.241	22.2616	121.74	31.9186	0	81.5128	73.6449	13.0074				102.752	28.2033	35.2935
	5	329.098	46.1865	123.624	639.994	72.5556		566.631	309.62	99.7414	502.686		52.4465			5	98.9962	13.8934	37.1874	114.231	12.9503	0	85.9252	46.9515	15.125	103.931	0	10.8434				98.9962	13.8934	37.1874
	6	316.915	91.6438	103.129	490.409	148.287	122.33		463.553		422.101	366.239	73.1795			6	95.3314	27.5674	31.0223	87.5322	26.4675	21.8345	0	70.2942	0	87.2697	75.7203	15.1299				95.3314	27.5674	31.0223
	7	339.585	84.8411	76.1588	618.675	64.7214	107.978	475.253	304.924	144.988	532.369	308.125	36.3073			7	102.151	25.5211	22.9094	110.426	11.552	19.2728	72.0684	46.2394	21.9863	110.068	63.7051	7.50657				102.151	25.5211	22.9094
	8	305.886		85.3786	554.492	81.3277	104.451	786.111	425.719	66.6221	483.635	369.998	76.9158			8	92.0137	0	25.6828	98.9703	14.516	18.6433	119.208	64.557	10.1027	99.9919	76.4974	15.9024				92.0137	30.0693	25.6828
	9		99.961	87.2584	582.719	167.205	76.4551	533.124	386.862	64.7095	370.843	348.59				9	0	30.0693	26.2482	104.008	29.8441	13.6463	80.8441	58.6646	9.8127	76.6721	72.0713	0				124.968	25.8951	26.2482
	10				212.237	100.15	97.8501	578.475	452.047	183.774						10	0	0	0	37.8818	17.8756	17.4651	87.7213	68.5494	27.8679	0	0	0				117.926	45.0708	13.4812
	11							696.988	479.44							11	0	0	0	0	0	0	105.693	72.7034	0	0	0	0				104.056	19.241	13.7751
	12							718.205								12	0	0	0	0	0	0	108.91	0	0	0	0	0				114.231	12.9503	16.5522
	13							786.809								13	0	0	0	0	0	0	119.314	0	0	0	0	0				87.5322	26.4675	22.2616
	14							751.566								14	0	0	0	0	0	0	113.969	0	0	0	0	0				110.426	11.552	21.8345
	15							784.058								15	0	0	0	0	0	0	118.896	0	0	0	0	0				98.9703	14.516	19.2728
	16							618.597								16	0	0	0	0	0	0	93.8055	0	0	0	0	0				104.008	29.8441	18.6433
	17							606.416								17	0	0	0	0	0	0	91.9583	0	0	0	0	0				37.8818	17.8756	13.6463
	18							575.439								18	0	0	0	0	0	0	87.2609	0	0	0	0	0				99.1707	51.5215	17.4651
	19															19	0	0	0	0	0	0	0	0	0	0	0	0				93.5161	52.6311	32.8873
	20															20	0	0	0	0	0	0	0	0	0	0	0	0				121.74	31.9186	13.136
																																85.9252	46.9515	15.7512
																																72.0684	70.2942	15.125
																																119.208	46.2394	21.9863
																																80.8441	64.557	10.1027
																																87.7213	58.6646	9.8127
																																105.693	68.5494	27.8679
																																108.91	72.7034	15.0131
																																119.314	74.5659	10.2259
																																113.969	67.3878	13.0074
																																118.896	72.8301	10.8434
																																93.8055	73.6449	15.1299
																																91.9583	75.7203	7.50657
																																87.2609	63.7051	15.9024
																																119.699	76.4974
																																97.2049	72.0713
																																123.651
																																81.5128
																																103.931
																																87.2697
																																110.068
																																99.9919
																																76.6721
																															average	100	43.9892	19.7789
																															S ERROR	2.55988	3.86823	1.41064
																															N	42	35	33
raw values	Sox2 in regen SC	6-2-14 DMSO 24 hrs	6-2-14 cyc 24 hrs	6-2-14 cyc 72 hrs	12-19-18 DMSO 24 hrs	12-19-18 cyc 24 hrs	12-19-18 cyc 72 hrs	3-11-19 DMSO 24 hrs	3-11-19 cyc 24 hrs	3-11-19 cyc 72 hrs	5-13-19 DMSO 24 hrs	5-13-19 cyc 24 hrs	5-13-19 cyc 72 hrs			Sox2 in regen SC	6-2-14 DMSO 24 hrs	6-2-14 cyc 24 hrs	6-2-14 cyc 72 hrs	12-19-18 DMSO 24 hrs	12-19-18 cyc 24 hrs	12-19-18 cyc 72 hrs	3-11-19 DMSO 24 hrs	3-11-19 cyc 24 hrs	3-11-19 cyc 72 hrs	5-13-19 DMSO 24 hrs	5-13-19 cyc 24 hrs	5-13-19 cyc 72 hrs				DMSO	cyc 24 hrs	cyc 72 hrs
	1	461	272	300	1584	1085		919	1415	780	1914	1452				1	82.2794	48.5467	53.5441	133.011	91.1095	0	79.2184	121.974	67.2365	118.836	90.1513	0				82.2794	48.5467	53.5441
	2	453	325	276	1249	1212	663	880		705	1377	1581	817			2	80.8516	58.0061	49.2606	104.881	101.774	55.6733	75.8566	0	60.7715	85.4948	98.1607	50.7256				80.8516	58.0061	49.2606
	3	753	474				674		1386	941	1799	1500				3	134.396	84.5997	0	0	0	56.597	0	119.474	81.1149	111.696	93.1315	0				134.396	84.5997	82.9934
	4	584	404	465	829			1371	1566	709	1324	1351	742			4	104.233	72.1061	82.9934	69.6127	0	0	118.181	134.99	61.1163	82.2041	83.8805	46.0691				104.233	72.1061	66.2162
	5	525	328	371	1216		590	1275	1196	773	1562	1728	980			5	93.7022	58.5416	66.2162	102.11	0	49.5434	109.906	103.096	66.6331	96.981	107.288	60.8459				93.7022	58.5416	52.8302
	6	654		296	1008	1312	573		1424	823	1756	1711	748			6	116.726	0	52.8302	84.6436	110.171	48.1159	0	122.75	70.9432	109.026	106.232	46.4416				116.726	66.3947	52.8302
	7	492	372	296	1224	608		806		813			807			7	87.8123	66.3947	52.8302	102.782	51.0549	0	69.4778	0	70.0812	0	0	50.1048				87.8123	50.8669	40.872
	8		285			629	720	1054	1612	737	1772	1386	906			8	0	50.8669	0	0	52.8183	60.4597	90.8555	138.956	63.5299	110.019	86.0536	56.2515				133.011	61.9327	55.6733
	9		347	229	1631		599	1113	1432		1381					9	0	61.9327	40.872	136.958	0	50.2991	95.9414	123.439	0	85.7431	0	0				104.881	91.1095	56.597
	10				786	624		798	1410	903						10	0	0	0	66.0019	52.3984	0	68.7882	121.543	77.8392	0	0	0				69.6127	101.774	49.5434
	11							1425								11	0	0	0	0	0	0	122.836	0	0	0	0	0				102.11	110.171	48.1159
	12							1280								12	0	0	0	0	0	0	110.337	0	0	0	0	0				84.6436	51.0549	60.4597
	13															13	0	0	0	0	0	0	0	0	0	0	0	0				102.782	52.8183	50.2991
	14															14	0	0	0	0	0	0	0	0	0	0	0	0				136.958	52.3984	67.2365
	15															15	0	0	0	0	0	0	0	0	0	0	0	0				66.0019	121.974	60.7715
	16							1458								16	0	0	0	0	0	0	125.681	0	0	0	0	0				79.2184	119.474	81.1149
	17							1542								17	0	0	0	0	0	0	132.921	0	0	0	0	0				75.8566	134.99	61.1163
	18															18	0	0	0	0	0	0	0	0	0	0	0	0				118.181	103.096	66.6331
	19															19	0	0	0	0	0	0	0	0	0	0	0	0				109.906	122.75	70.9432
	20															20	0	0	0	0	0	0	0	0	0	0	0	0				69.4778	138.956	70.0812
																																90.8555	123.439	63.5299
																																95.9414	121.543	77.8392
																																68.7882	90.1513	50.7256
																																122.836	98.1607	46.0691
																																110.337	93.1315	60.8459
																																125.681	83.8805	46.4416
																																132.921	107.288	50.1048
																																118.836	106.232	56.2515
																																85.4948	86.0536
																																111.696
																																82.2041
																																96.981
																																109.026
																																110.019
																																85.7431
																															average	100	90.0497	58.8907
																															S ERROR	3.47745	5.22616	2.05947
																															N	35	29	28
		no staining	no staining	no staining													no staining	no staining	no staining
raw values	P-H3 in regen tail	6-2-14 DMSO 24 hrs	6-2-14 cyc 24 hrs	6-2-14 cyc 72 hrs	12-19-18 DMSO 24 hrs	12-19-18 cyc 24 hrs	12-19-18 cyc 72 hrs	3-11-19 DMSO 24 hrs	3-11-19 cyc 24 hrs	3-11-19 cyc 72 hrs	5-13-19 DMSO 24 hrs	5-13-19 cyc 24 hrs	5-13-19 cyc 72 hrs			P-H3 in regen tail	6-2-14 DMSO 24 hrs	6-2-14 cyc 24 hrs	6-2-14 cyc 72 hrs	12-19-18 DMSO 24 hrs	12-19-18 cyc 24 hrs	12-19-18 cyc 72 hrs	3-11-19 DMSO 24 hrs	3-11-19 cyc 24 hrs	3-11-19 cyc 72 hrs	5-13-19 DMSO 24 hrs	5-13-19 cyc 24 hrs	5-13-19 cyc 72 hrs				DMSO	cyc 24 hrs	cyc 72 hrs
	1				266	174	78	177	136	123	199	135	54			1				141.993	92.8826	41.637	112.649	86.5553	78.2816	141.135	95.7447	38.2979				141.993	92.8826	41.637
	2				227	161	58	99	174	82	174	112	66			2				121.174	85.9431	30.9609	63.0072	110.74	52.1877	123.404	79.4326	46.8085				121.174	85.9431	30.9609
	3				108	184	78		235	140	179	131	37			3				57.6512	98.2206	41.637	0	149.562	89.101	126.95	92.9078	26.2411				57.6512	98.2206	41.637
	4					44	18	192	207	71	76	114	46			4				0	23.4875	9.60854	122.196	131.742	45.187	53.9007	80.8511	32.6241				93.9502	23.4875	9.60854
	5				176	49	80	181	138	69	130	141				5				93.9502	26.1566	42.7046	115.195	87.8282	43.9141	92.1986	100	0				72.5979	26.1566	42.7046
	6				136	136	78		135	92	147	106	46			6				72.5979	72.5979	41.637	0	85.9189	58.5521	104.255	75.1773	32.6241				148.399	72.5979	41.637
	7				278	24	50	86	140	97	169	143	57			7				148.399	12.8114	26.6904	54.7335	89.101	61.7343	119.858	101.418	40.4255				116.37	12.8114	26.6904
	8				218	57	78	161	254	117	114	125	67			8				116.37	30.427	41.637	102.466	161.655	74.463	80.8511	88.6525	47.5177				121.708	30.427	41.637
	9				228	24		110	211	131	81	153				9				121.708	12.8114	0	70.008	134.288	83.3731	57.4468	108.511	0				26.1566	12.8114	38.968
	10				49	58	73	145	221	73						10				26.1566	30.9609	38.968	92.2832	140.652	46.4598	0	0	0				112.649	30.9609	78.2816
	11							245	223							11				0	0	0	155.927	141.925	0	0	0	0				63.0072	86.5553	52.1877
	12							145								12				0	0	0	92.2832	0	0	0	0	0				122.196	110.74	89.101
	13							224								13				0	0	0	142.562	0	0	0	0	0				115.195	149.562	45.187
	14							108								14				0	0	0	68.7351	0	0	0	0	0				54.7335	131.742	43.9141
	15							195								15				0	0	0	124.105	0	0	0	0	0				102.466	87.8282	58.5521
	16							156								16				0	0	0	99.284	0	0	0	0	0				70.008	85.9189	61.7343
	17							166								17				0	0	0	105.648	0	0	0	0	0				92.2832	89.101	74.463
	18							124								18				0	0	0	78.9181	0	0	0	0	0				155.927	161.655	83.3731
	19															19				0	0	0	0	0	0	0	0	0				92.2832	134.288	46.4598
	20															20				0	0	0	0	0	0	0	0	0				142.562	140.652	38.2979
																																68.7351	141.925	46.8085
																																124.105	95.7447	26.2411
																																99.284	79.4326	32.6241
																																105.648	92.9078	32.6241
																																78.9181	80.8511	40.4255
																																141.135	100	47.5177
																																123.404	75.1773
																																126.95	101.418
																																53.9007	88.6525
																																92.1986	108.511
																																104.255
																																119.858
																																80.8511
																																57.4468
																															average	100	87.6321	46.6644
																															S ERROR	5.45355	7.33602	3.60454
																															N	30	26	22

## Sheet: 24h vs 72h SAG
raw values	12/101 volume	6-2-14 DMSO 24 hrs	6-2-14 SAG 24 hrs	6-2-14 SAG 72 hrs	5-13-19 DMSO 24 hrs	5-13-19 SAG 24 hrs	5-13-19 SAG 72 hrs	B 8/5/2019 DMSO	B 8/5/2019 24 hrs SAG	B 8/5/2019 72 hrs SAG	B 8/6/2019 DMSO	B 8/6/2019 24 hrs SAG	B 8/6/2019 72 hrs SAG		normalized to sample set matched control		6-2-14 DMSO 24 hrs	6-2-14 SAG 24 hrs	6-2-14 SAG 72 hrs	5-13-19 DMSO 24 hrs	5-13-19 SAG 24 hrs	5-13-19 SAG 72 hrs	B 8/5/2019 DMSO	B 8/5/2019 24 hrs SAG	B 8/5/2019 72 hrs SAG	B 8/6/2019 DMSO	B 8/6/2019 24 hrs SAG	B 8/6/2019 72 hrs SAG			combined stats
	1	511581	474701		666224		394678	984735	664548	880208	1.08377e+06	532726	434685			1	69.4112	64.4074	0	117.604	0	69.67	129.11	87.1296	115.405	126.944	62.3992	50.9154				DMSO	SAG 24 hrs	SAG 72 hrs
	2	575523	975352	947042	751389		597190	824417	795937	748136		624250	957091			2	78.0868	132.336	128.494	132.638	0	105.418	108.09	104.356	98.089	0	73.1195	112.106				69.4112	64.4074	128.494
	3		760263	470428	652799	359815	634989	780399	658350	714687	729462	637086	944619			3	0	103.152	63.8276	115.235	63.5159	112.091	102.319	86.317	93.7034	85.4432	74.6231	110.645				78.0868	132.336	63.8276
	4	1.26238e+06		429767	303495	276217	566135	513974	573050	994258	1.07589e+06	513171	368668			4	171.279	0	58.3107	53.5741	48.7589	99.9362	67.3877	75.1332	130.358	126.021	60.1087	43.1827				171.279	103.152	58.3107
	5	774388	528555	429181	734337	494888	327532	710034	728241	931720	667815	706109				5	105.069	71.7143	58.2312	129.628	87.3595	57.8172	93.0934	95.4805	122.159	78.2224	82.7079	0				105.069	71.7143	58.2312
	6	728932	892626	270147	661318	409696	375740		678766		785003	837240	563876			6	98.9014	121.111	36.6535	116.738	72.321	66.3271	0	88.9938	0	91.9488	98.0674	66.0478				98.9014	121.111	36.6535
	7	608967	703653	620492		385372					780500	752879	698327			7	82.6245	95.4715	84.1883	0	68.0274	0	0	0	0	91.4214	88.1861	81.7963				82.6245	95.4715	84.1883
	8	649242	851631	989627	418138	453441	466609					800825				8	88.089	115.549	134.272	73.8114	80.0432	82.3676	0	0	0	0	93.8021	0				88.089	115.549	134.272
	9	785222		949612	344267											9	106.539	0	128.843	60.7713	0	0	0	0	0	0	0	0				106.539	63.5159	128.843
	10															10	0	0	0	0	0	0	0	0	0	0	0	0				117.604	48.7589	69.67
	11															11	0	0	0	0	0	0	0	0	0	0	0	0				132.638	87.3595	105.418
	12															12	0	0	0	0	0	0	0	0	0	0	0	0				115.235	72.321	112.091
	13															13	0	0	0	0	0	0	0	0	0	0	0	0				53.5741	68.0274	99.9362
	14															14	0	0	0	0	0	0	0	0	0	0	0	0				129.628	80.0432	57.8172
	15															15	0	0	0	0	0	0	0	0	0	0	0	0				116.738	87.1296	66.3271
	16															16	0	0	0	0	0	0	0	0	0	0	0	0				73.8114	104.356	82.3676
	17															17	0	0	0	0	0	0	0	0	0	0	0	0				60.7713	86.317	115.405
	18															18	0	0	0	0	0	0	0	0	0	0	0	0				129.11	75.1332	98.089
	19															19	0	0	0	0	0	0	0	0	0	0	0	0				108.09	95.4805	93.7034
	20															20	0	0	0	0	0	0	0	0	0	0	0	0				102.319	88.9938	130.358
																																67.3877	62.3992	122.159
																																93.0934	73.1195	50.9154
																																126.944	74.6231	112.106
																																85.4432	60.1087	110.645
																																126.021	82.7079	43.1827
																																78.2224	98.0674	66.0478
																																91.9488	88.1861	81.7963
																																91.4214	93.8021
																															average	100	84.9701	88.8791
																															S ERROR	5.12138	3.77775	5.8245
																															N	27	27	26
raw values	SC regen length	6-2-14 DMSO 24 hrs	6-2-14 SAG 24 hrs	6-2-14 SAG 72 hrs	5-13-19 DMSO 24 hrs	5-13-19 SAG 24 hrs	5-13-19 SAG 72 hrs	B 8/5/2019 DMSO	B 8/5/2019 24 hrs SAG	B 8/5/2019 72 hrs SAG	B 8/6/2019 DMSO	B 8/6/2019 24 hrs SAG	B 8/6/2019 72 hrs SAG				6-2-14 DMSO 24 hrs	6-2-14 SAG 24 hrs	6-2-14 SAG 72 hrs	5-13-19 DMSO 24 hrs	5-13-19 SAG 24 hrs	5-13-19 SAG 72 hrs	B 8/5/2019 DMSO	B 8/5/2019 24 hrs SAG	B 8/5/2019 72 hrs SAG	B 8/6/2019 DMSO	B 8/6/2019 24 hrs SAG	B 8/6/2019 72 hrs SAG				DMSO	SAG 24 hrs	SAG 72 hrs
	1	639.609	267.633	298.48	838.921	465.887	643.609	944.145	688.683	529.8	981.489	436.413	372.144			1	99.5731	41.6646	46.4668	107.125	59.4906	82.1845	100.02	72.9571	56.1255	107.713	47.894	40.8409				99.5731	41.6646	46.4668
	2		505.826	386.493	762.656	403.385	425.064	966.763	561.865	450.69	968.463	729.246	718.547			2	0	78.7461	60.1685	97.3861	51.5095	54.2778	102.416	59.5223	47.7448	106.284	80.0309	78.8567				89.5273	78.7461	60.1685
	3	575.079	537.072	339.794	862.884	226.347	643.894	927.864	535.053	551.592	810.815	699.13	499.645			3	89.5273	83.6104	52.8985	110.184	28.903	82.2209	98.2953	56.682	58.434	88.9826	76.7258	54.8333				110.183	83.6104	52.8985
	4	707.761	415.831	422.502		557.564	448.438	941.518	498.803	296.159	840.025	584.883	355.407			4	110.183	64.7357	65.7743	0	71.1971	57.2625	99.7417	52.8418	31.3742	92.1882	64.1878	39.004				105.545	64.7357	65.7743
	5	677.972	329.216	396.497	800.765			939.49		265.004		671.038	467.267			5	105.545	51.2517	61.7259	102.252	0	0	99.5269	0	28.0738	0	73.6428	51.28				101.821	51.2517	61.7259
	6	654.05	170.165	239.664	745.35	729.686	533.762		507.244	664.707	910.199	658.818	499.201			6	101.821	26.491	37.3104	95.1761	93.1759	68.1578	0	53.736	70.4172	99.8895	72.3018	54.7846				99.6935	26.491	37.3104
	7	640.382	208.08		822.135	476.384				607.026	956.247	594.392	706.843			7	99.6935	32.3936	0	104.981	60.831	0	0	0	64.3066	104.943	65.2314	77.5722				87.5759	32.3936	56.0054
	8	562.545	363.448	359.752	770.318	448.883	389.669					660.228				8	87.5759	56.5809	56.0054	98.3644	57.3193	49.7581	0	0	0	0	72.4565	0				106.081	56.5809	57.736
	9	681.411		370.868	661.986		481.257									9	106.081	0	57.736	84.5311	0	61.4532	0	0	0	0	0	0				107.125	59.4906	82.1845
	10															10	0	0	0	0	0	0	0	0	0	0	0	0				97.3861	51.5095	54.2778
	11															11	0	0	0	0	0	0	0	0	0	0	0	0				110.184	28.903	82.2209
	12															12	0	0	0	0	0	0	0	0	0	0	0	0				102.252	71.1971	57.2625
	13															13	0	0	0	0	0	0	0	0	0	0	0	0				95.1761	93.1759	68.1578
	14															14	0	0	0	0	0	0	0	0	0	0	0	0				104.981	60.831	49.7581
	15															15	0	0	0	0	0	0	0	0	0	0	0	0				98.3644	57.3193	61.4532
	16															16	0	0	0	0	0	0	0	0	0	0	0	0				84.5311	72.9571	56.1255
	17															17	0	0	0	0	0	0	0	0	0	0	0	0				100.02	59.5223	47.7448
	18															18	0	0	0	0	0	0	0	0	0	0	0	0				102.416	56.682	58.434
	19															19	0	0	0	0	0	0	0	0	0	0	0	0				98.2953	52.8418	31.3742
	20															20	0	0	0	0	0	0	0	0	0	0	0	0				99.7417	53.736	28.0738
	21																															99.5269	47.894	70.4172
	22																															107.713	80.0309	64.3066
	23																															106.284	76.7258	40.8409
	24																															88.9826	64.1878	78.8567
	25																															92.1882	73.6428	54.8333
																																99.8895	72.3018	39.004
																																104.943	65.2314	51.28
																																	72.4565	54.7846
																																		77.5722
																															average	100	60.9325	56.7948
																															S ERROR	1.31306	3.06979	2.58911
																															N	27	28	29
raw values	muscle regen length	6-2-14 DMSO 24 hrs	6-2-14 SAG 24 hrs	6-2-14 SAG 72 hrs	5-13-19 DMSO 24 hrs	5-13-19 SAG 24 hrs	5-13-19 SAG 72 hrs	B 8/5/2019 DMSO	B 8/5/2019 24 hrs SAG	B 8/5/2019 72 hrs SAG	B 8/6/2019 DMSO	B 8/6/2019 24 hrs SAG	B 8/6/2019 72 hrs SAG				6-2-14 DMSO 24 hrs	6-2-14 SAG 24 hrs	6-2-14 SAG 72 hrs	5-13-19 DMSO 24 hrs	5-13-19 SAG 24 hrs	5-13-19 SAG 72 hrs	B 8/5/2019 DMSO	B 8/5/2019 24 hrs SAG	B 8/5/2019 72 hrs SAG	B 8/6/2019 DMSO	B 8/6/2019 24 hrs SAG	B 8/6/2019 72 hrs SAG				DMSO	SAG 24 hrs	SAG 72 hrs
	1	342.446	227.851	207.311	578.951	476.383	375.031	577.016	401.132	418.838		485.373	384.907			1	103.011	68.54	62.3613	119.699	98.4927	77.538	94.6769	65.8178	68.7231	0	82.0583	65.0733				103.011	68.54	62.3613
	2	324.779	431.909	277.79	470.155	471.511	504.204	630.244	479.874	352.061	715.523	392.454	481.968			2	97.697	129.923	83.5622	97.2049	97.4853	104.245	103.411	78.7379	57.7663	120.968	66.3492	81.4827				97.697	129.923	83.5622
	3	359.188	343.668	265.931	598.07		459.73	634.817	397.848	384.926	514.8		417.632			3	108.048	103.379	79.9949	123.651	0	95.0496	104.161	65.279	63.1588	87.0333	0	70.6059				108.048	103.379	79.9949
	4	341.584	418.943	202.567	394.256	327.213	473.205	580.226	333.104	397.486	586.637	450.007	474.457			4	102.752	126.022	60.9343	81.5128	67.6517	97.8355	95.2036	54.6558	65.2196	99.1783	76.0793	80.2128				102.752	126.022	60.9343
	5	329.098	324.103	234.917	502.686	426.362	396.878	624.986	370.206	419.067	506.967	456.094	453.881			5	98.9962	97.4936	70.6655	103.931	88.1507	82.0549	102.548	60.7435	68.7606	85.7091	77.1084	76.7342				98.9962	97.4936	70.6655
	6	316.915	225.779		422.101	414.887			437.95	403.71	627.975	393.789				6	95.3314	67.9167	0	87.2697	85.7782	0	0	71.859	66.2408	106.167	66.5749	0				95.3314	67.9167	84.0212
	7	339.585	282.061	279.316	532.369	524.854				393.7	597.083	408.67	424.795			7	102.151	84.8469	84.0212	110.068	108.514	0	0	0	64.5984	100.944	69.0907	71.8169				102.151	84.8469	78.1043
	8	305.886	275.236	259.646	483.635	372.691	415.56					408.545				8	92.0137	82.7939	78.1043	99.9919	77.0542	85.9174	0	0	0	0	69.0696	0				92.0137	82.7939	75.8882
	9			252.279	370.843		490.97									9	0	0	75.8882	76.6721	0	101.508	0	0	0	0	0	0				119.699	98.4927	77.538
	10															10																97.2049	97.4853	104.245
	11															11																123.651	67.6517	95.0496
	12															12																81.5128	88.1507	97.8355
	13															13																103.931	85.7782	82.0549
	14															14																87.2697	108.514	85.9174
	15															15																110.068	77.0542	101.508
	16															16																99.9919	65.8178	68.7231
	17															17																76.6721	78.7379	57.7663
	18															18																94.6769	65.279	63.1588
	19															19																103.411	54.6558	65.2196
	20															20																104.161	60.7435	68.7606
																																95.2036	71.859	66.2408
																																102.548	82.0583	64.5984
																																120.968	66.3492	65.0733
																																87.0333	76.0793	81.4827
																																99.1783	77.1084	70.6059
																																85.7091	66.5749	80.2128
																																106.167	69.0907	76.7342
																																100.944	69.0696	71.8169
																															average	100	81.6952	76.4312
																															S ERROR	2.06905	3.55322	2.34639
																															N	28	28	28
raw values	Sox2 in regen SC	6-2-14 DMSO 24 hrs	6-2-14 SAG 24 hrs	6-2-14 SAG 72 hrs	5-13-19 DMSO 24 hrs	5-13-19 SAG 24 hrs	5-13-19 SAG 72 hrs	B 8/5/2019 DMSO	B 8/5/2019 24 hrs SAG	B 8/5/2019 72 hrs SAG	B 8/6/2019 DMSO	B 8/6/2019 24 hrs SAG	B 8/6/2019 72 hrs SAG				6-2-14 DMSO 24 hrs	6-2-14 SAG 24 hrs	6-2-14 SAG 72 hrs	5-13-19 DMSO 24 hrs	5-13-19 SAG 24 hrs	5-13-19 SAG 72 hrs	B 8/5/2019 DMSO	B 8/5/2019 24 hrs SAG	B 8/5/2019 72 hrs SAG	B 8/6/2019 DMSO	B 8/6/2019 24 hrs SAG	B 8/6/2019 72 hrs SAG				DMSO	SAG 24 hrs	SAG 72 hrs
	1	461	377	313	1914		1531	1931	2319	1993	2021	2003	1919			1	82.2794	67.2871	55.8644	118.836	0	95.0563	102.332	122.893	105.617	108.761	107.792	103.272				82.2794	67.2871	55.8644
	2	453		490	1377	1268	1790	1921	1975	1819	1913	2321	2130			2	80.8516	0	87.4554	85.4948	78.7272	111.137	101.802	104.663	96.3964	102.949	124.906	114.627				80.8516	121.902	87.4554
	3	753	683	416	1799	1084	1717	1869	1690	1567		1913	1943			3	134.396	121.902	74.2478	111.696	67.3031	106.605	99.0461	89.5601	83.0419	0	102.949	104.564				134.396	66.5732	74.2478
	4	584	373	366	1324	1352	1591	1907	2127	2251		1573	2053			4	104.233	66.5732	65.3238	82.2041	83.9426	98.7815	101.06	112.719	119.29	0	84.6518	110.483				104.233	77.9959	65.3238
	5	525	437	479	1562	1325		1807	2185	2083	1549	1793	1928			5	93.7022	77.9959	85.4921	96.981	82.2662	0	95.7605	115.792	110.387	83.3602	96.4912	103.756				93.7022	126.543	85.4921
	6	654	709		1756		1710		2461	2067	1877	1582				6	116.726	126.543	0	109.026	0	106.17	0	130.419	109.539	101.012	85.1362	0				116.726	58.5416	72.463
	7	492	328	406		1461				2348	1931	2039	2195			7	87.8123	58.5416	72.463	0	90.7101	0	0	0	124.43	103.918	109.73	118.125				87.8123	78.8883	76.925
	8		442	431	1772	1365	1734					2212				8	0	78.8883	76.925	110.019	84.7497	107.66	0	0	0	0	119.04	0				118.836	78.7272	58.5416
	9			328	1381		1410									9	0	0	58.5416	85.7431	0	87.5437	0	0	0	0	0	0				85.4948	67.3031	95.0563
	10															10																111.696	83.9426	111.137
	11															11																82.2041	82.2662	106.605
	12															12																96.981	90.7101	98.7815
	13															13																109.026	84.7497	106.17
	14															14																110.019	122.893	107.66
	15															15																85.7431	104.663	87.5437
	16															16																102.332	89.5601	105.617
	17															17																101.802	112.719	96.3964
	18															18																99.0461	115.792	83.0419
	19															19																101.06	130.419	119.29
	20															20																95.7605	107.792	110.387
																																108.761	124.906	109.539
																																102.949	102.949	124.43
																																83.3602	84.6518	103.272
																																101.012	96.4912	114.627
																																103.918	85.1362	104.564
																																	109.73	110.483
																																	119.04	103.756
																																		118.125
																															average	100	96.0064	96.1713
																															S ERROR	2.63626	4.06668	3.53065
																															N	25	27	28
																	no staining	no staining	no staining
raw values	P-H3 in regen tail	no staining	no staining	no staining													6-2-14 DMSO 24 hrs	6-2-14 SAG 24 hrs	6-2-14 SAG 72 hrs	5-13-19 DMSO 24 hrs	5-13-19 SAG 24 hrs	5-13-19 SAG 72 hrs	B 8/5/2019 DMSO	B 8/5/2019 24 hrs SAG	B 8/5/2019 72 hrs SAG	B 8/6/2019 DMSO	B 8/6/2019 24 hrs SAG	B 8/6/2019 72 hrs SAG				DMSO	SAG 24 hrs	SAG 72 hrs
	1	6-2-14 DMSO 24 hrs	6-2-14 SAG 24 hrs	6-2-14 SAG 72 hrs	5-13-19 DMSO 24 hrs	5-13-19 SAG 24 hrs	5-13-19 SAG 72 hrs	B 8/5/2019 DMSO	B 8/5/2019 24 hrs SAG	B 8/5/2019 72 hrs SAG	B 8/6/2019 DMSO	B 8/6/2019 24 hrs SAG	B 8/6/2019 72 hrs SAG			1				141.135	96.4539	155.319	106.524	93.2722	92.7625	94.6896	71.3538	60.1346				141.135	96.4539	155.319
	2				199	136	219	209	183	182	211	159	134			2				123.404	0	139.007	108.053	101.427	82.5688	115.333	77.1877	0				123.404	91.4894	139.007
	3				174		196	212	199	162	257	172				3				126.95	91.4894	0	106.014	93.2722	75.4332	84.8168	71.3538	60.1346				126.95	85.8156	134.043
	4				179	129		208	183	148	189	159	134			4				53.9007	85.8156	134.043	89.7044	83.5882	80.5301	95.1384	69.1099	58.7883				53.9007	112.057	106.383
	5				76	121	189	176	164	158	212	154	131			5				92.1986	112.057	106.383	89.7044	0	91.7431	0	69.1099	78.534				92.1986	110.638	116.312
	6				130	158	150	176		180		154	175			6				104.255	110.638	116.312	0	69.317	91.2334	89.7532	53.8519	52.9544				104.255	104.965	95.7447
	7				147	156	164		136	179	200	120	118			7				119.858	104.965	0	0	0	96.84	120.269	54.3007	77.6365				119.858	75.1773	121.277
	8				169	148				190	268	121	173			8				80.8511	75.1773	95.7447	0	0	0	0	74.9439	0				80.8511	93.2722	92.7625
	9				114	106	135					167				9				57.4468	0	121.277	0	0	0	0	0	0				57.4468	101.427	82.5688
	10				81		171									10				0	0	0	0	0	0	0	0	0				106.524	93.2722	75.4332
	11															11																108.053	83.5882	80.5301
	12															12																106.014	69.317	91.7431
	13															13																89.7044	71.3538	91.2334
	14															14																89.7044	77.1877	96.84
	15															15																94.6896	71.3538	60.1346
	16															16																115.333	69.1099	60.1346
	17															17																84.8168	69.1099	58.7883
	18															18																95.1384	53.8519	78.534
	19															19																89.7532	54.3007	52.9544
	20															20																120.269	74.9439	77.6365
																															average	100	82.9342	93.3689
																															S ERROR	4.90192	3.83199	6.32119
																															N	20	20	20
