# Supplementary material for: Non-canonical Hedgehog signaling regulates spinal cord and muscle regeneration in Xenopus laevis larvae
Source: eLife. 2021 May 6;10:e61804. doi: 10.7554/eLife.61804 (PMC8137141; doi:10.7554/eLife.61804)
Supplement: Figure 2—figure supplement 1—source data 1. [file elife-61804-fig2-figsupp1-data1.xlsx]

## Sheet: 8xGli +- SAG validation
	EGFP vs iRFP670 distribution by treatment
	vehicle control						10 nM SAG
	5 hpa	signal intensity	signal intensity				5 hpa	signal intensity	signal intensity
Sample ID	cell ID	X (iRFP670)	Y (EGFP)			Sample ID	cell ID	X (iRFP670)	Y (EGFP)
5 hours 10 nM SAG 1	0	649.394	684.325			5 hours H2O control 1	1	1112.88	795.102
5 hours 10 nM SAG 1	1	892.757	774.647			5 hours H2O control 1	2	1656.57	887.106
5 hours 10 nM SAG 1	2	1018.66	820.009			5 hours H2O control 1	3	1251.08	817.664
5 hours 10 nM SAG 1	3	826.842	760.076			5 hours H2O control 1	4	1717.82	1690.55
5 hours 10 nM SAG 1	4	1168.94	812.686			5 hours H2O control 1	5	1238.24	815.379
5 hours 10 nM SAG 1	5	1245.95	910.566			5 hours H2O control 1	6	1204.94	827.797
5 hours 10 nM SAG 1	6	1538.85	883.095			5 hours H2O control 1	7	1427	874.935
5 hours 10 nM SAG 1	7	1423.79	794.489			5 hours H2O control 1	8	1289.61	898.076
5 hours 10 nM SAG 1	8	1577.94	841.786			5 hours H2O control 1	9	1330.5	1122.85
5 hours 10 nM SAG 1	9	1307.97	787.491			5 hours H2O control 1	10	934.334	824.865
5 hours 10 nM SAG 1	10	1338.63	877.623			5 hours H2O control 1	11	1121.48	834.371
5 hours 10 nM SAG 1	11	1047.79	787.9			5 hours H2O control 1	12	1706.39	953.05
5 hours 10 nM SAG 1	12	1176.36	775.793			5 hours H2O control 1	13	1096.52	851.301
5 hours 10 nM SAG 1	13	1551.75	831.426			5 hours H2O control 1	14	1315.25	876.965
5 hours 10 nM SAG 1	14	1241.89	831.73			5 hours H2O control 1	15	1168.29	807.954
5 hours 10 nM SAG 1	15	1078.81	762.697			5 hours H2O control 1	16	1582.38	896.422
5 hours 10 nM SAG 1	16	1448.89	948.12			5 hours H2O control 1	17	879.905	797.022
5 hours 10 nM SAG 1	17	1214.59	820.202			5 hours H2O control 1	18	912.98	798.925
5 hours 10 nM SAG 1	18	1674.53	1217.29			5 hours H2O control 1	19	1106.74	799.916
5 hours 10 nM SAG 1	19	1629.53	851.973			5 hours H2O control 1	20	1036.38	790.465
5 hours 10 nM SAG 1	20	1393.69	1270.47			5 hours H2O control 1	21	1310.78	917.556
5 hours 10 nM SAG 1	21	1271.56	844.352			5 hours H2O control 1	22	1414.55	825.229
5 hours 10 nM SAG 1	22	1270.44	816.156			5 hours H2O control 1	23	1215.63	807.154
5 hours 10 nM SAG 1	23	1574.12	937.598			5 hours H2O control 1	24	1405.85	820.586
5 hours 10 nM SAG 1	24	1470.13	847.486			5 hours H2O control 1	25	1409.95	847.052
5 hours 10 nM SAG 1	25	803.098	630.837			5 hours H2O control 1	26	1438.7	984.43
5 hours 10 nM SAG 1	26	1305.74	828.78			5 hours H2O control 1	27	1279.37	1278.85
5 hours 10 nM SAG 1	27	1510.93	816.674			5 hours H2O control 1	28	997.435	803.331
5 hours 10 nM SAG 1	28	1145.2	791.071			5 hours H2O control 1	29	1401.26	930.627
5 hours 10 nM SAG 1	29	1108.71	743.562			5 hours H2O control 1	30	1197.61	823.603
5 hours 10 nM SAG 1	30	694.449	655.536			5 hours H2O control 1	31	1375.41	964.496
5 hours 10 nM SAG 1	31	1663.61	938.619			5 hours H2O control 1	32	1053.51	824.408
5 hours 10 nM SAG 1	32	1008.5	748.856			5 hours H2O control 1	33	1117.35	808.445
5 hours 10 nM SAG 1	33	1403.57	814.769			5 hours H2O control 1	34	937.673	791.945
5 hours 10 nM SAG 1	34	1379.18	820.323			5 hours H2O control 1	35	1748.42	855.579
5 hours 10 nM SAG 1	35	1120.14	802.143			5 hours H2O control 1	36	844.553	748.766
5 hours 10 nM SAG 1	36	1086.79	874.654			5 hours H2O control 1	37	1553.26	970.098
5 hours 10 nM SAG 1	37	1595.59	887.28			5 hours H2O control 1	38	1728.56	883.956
5 hours 10 nM SAG 1	38	943.869	750.935			5 hours H2O control 1	39	1853.29	1072.98
5 hours 10 nM SAG 1	39	1079.47	867.401			5 hours H2O control 1	40	1482.41	857.188
5 hours 10 nM SAG 1	40	1172.02	808.326			5 hours H2O control 1	41	1611.06	1111.79
5 hours 10 nM SAG 1	41	1566.48	966.214			5 hours H2O control 1	42	1102.61	871.875
5 hours 10 nM SAG 1	42	1280.12	806.789			5 hours H2O control 1	43	1338.79	939.862
5 hours 10 nM SAG 1	43	1362.41	869.419			5 hours H2O control 1	44	1039.91	807.576
5 hours 10 nM SAG 1	44	1228.23	797.214			5 hours H2O control 1	45	1333.14	1130.18
5 hours 10 nM SAG 1	45	1373.6	821.651			5 hours H2O control 1	46	1268.76	886.042
5 hours 10 nM SAG 1	46	1840.76	1237.22			5 hours H2O control 1	47	1445.94	846.235
5 hours 10 nM SAG 1	47	1589.59	861.416			5 hours H2O control 1	48	1412.82	1208.36
5 hours 10 nM SAG 1	48	1793.13	944.834			5 hours H2O control 1	49	991.109	805.365
5 hours 10 nM SAG 1	49	1591.23	852.546			5 hours H2O control 1	50	935.09	791.523
5 hours 10 nM SAG 1	50	1070.48	787.882			5 hours H2O control 1	51	1635.37	1224.7
5 hours 10 nM SAG 1	51	1285.62	828.766			5 hours H2O control 1	52	1081.05	865.558
5 hours 10 nM SAG 1	52	1329.53	857.15			5 hours H2O control 1	53	1445.66	1184.83
5 hours 10 nM SAG 1	53	1002.41	764.988			5 hours H2O control 1	54	1218.31	823.349
5 hours 10 nM SAG 1	54	1306.05	821.021			5 hours H2O control 1	55	916.775	781.318
5 hours 10 nM SAG 1	55	1532.23	900.757			5 hours H2O control 1	56	1317.9	833.736
5 hours 10 nM SAG 1	56	1123.77	772.277			5 hours H2O control 1	57	1219.83	894.341
5 hours 10 nM SAG 1	57	1102.93	777.326			5 hours H2O control 1	58	894.418	755.778
5 hours 10 nM SAG 1	58	1071.53	798.301			5 hours H2O control 1	59	1127.76	803.792
5 hours 10 nM SAG 1	59	1535.45	1010.01			5 hours H2O control 1	60	1171.76	808.608
5 hours 10 nM SAG 1	60	1527.18	928.652			5 hours H2O control 1	61	1321.86	855.544
5 hours 10 nM SAG 1	61	1520.2	1319.51			5 hours H2O control 1	62	1667.06	842.67
5 hours 10 nM SAG 1	62	1342.68	1004.81			5 hours H2O control 1	63	1456.86	1032.87
5 hours 10 nM SAG 1	63	1374.97	836.904			5 hours H2O control 1	64	1003.05	788.623
5 hours 10 nM SAG 1	64	1639.35	940.597			5 hours H2O control 1	65	1248.99	773.759
5 hours 10 nM SAG 1	65	946.601	715.454			5 hours H2O control 1	66	1359.06	864.542
5 hours 10 nM SAG 1	66	1340.35	824.365			5 hours H2O control 1	67	1337.46	803.968
5 hours 10 nM SAG 1	67	1044.09	743.863			5 hours H2O control 1	68	1504.43	900.967
5 hours 10 nM SAG 1	68	1121.52	804.061			5 hours H2O control 1	69	1339.82	755.787
5 hours 10 nM SAG 1	69	1459.19	861.448			5 hours H2O control 1	70	1190.92	813.982
5 hours 10 nM SAG 1	70	1567.69	2187.22			5 hours H2O control 1	71	1269.4	764.624
5 hours 10 nM SAG 1	71	1266.3	834.402			5 hours H2O control 1	72	1297.61	799.227
5 hours 10 nM SAG 1	72	1523.37	872.171			5 hours H2O control 1	73	863.508	744.81
5 hours 10 nM SAG 1	73	1764.31	843.634			5 hours H2O control 1	74	1153.08	879.754
5 hours 10 nM SAG 1	74	1484.37	887.314			5 hours H2O control 1	75	1290.8	775.467
5 hours 10 nM SAG 1	75	1753.28	1313.34			5 hours H2O control 1	76	1194.54	866.197
5 hours 10 nM SAG 1	76	1586.02	833.645			5 hours H2O control 1	77	767.193	735.338
5 hours 10 nM SAG 1	77	764.802	655.466			5 hours H2O control 1	78	1184.62	1430.72
5 hours 10 nM SAG 1	78	853.614	676.761			5 hours H2O control 1	79	1127.03	1122.68
5 hours 10 nM SAG 1	79	719.511	636.46			5 hours H2O control 1	80	1755.15	852.959
5 hours 10 nM SAG 1	80	1109.49	707.782			5 hours H2O control 1	81	920.887	780.095
5 hours 10 nM SAG 1	81	922.888	691.933			5 hours H2O control 1	82	810.329	737.985
5 hours 10 nM SAG 1	82	871.863	683.941			5 hours H2O control 1	83	882.578	786.735
5 hours 10 nM SAG 1	83	872.822	758.822			5 hours H2O control 1	84	1320.44	1402.9
5 hours 10 nM SAG 1	84	881.935	865.924			5 hours H2O control 1	85	1334.68	824.613
5 hours 10 nM SAG 1	85	733.276	631.462			5 hours H2O control 1	86	1215.25	806.663
5 hours 10 nM SAG 1	86	735.181	622.67			5 hours H2O control 1	87	867.802	770.715
5 hours 10 nM SAG 1	87	1548.5	770.577			5 hours H2O control 1	88	816.69	763.445
5 hours 10 nM SAG 1	88	1169.19	807.141			5 hours H2O control 1	89	913.825	760.139
5 hours 10 nM SAG 1	89	983.955	696.234			5 hours H2O control 1	90	786.987	719.803
5 hours 10 nM SAG 1	90	1025.18	711.283			5 hours H2O control 1	91	876.476	738.791
5 hours 10 nM SAG 1	91	1069.67	746.932			5 hours H2O control 1	92	857.136	736.7
5 hours 10 nM SAG 1	92	971.97	673.721			5 hours H2O control 1	93	1177	747.224
5 hours 10 nM SAG 1	93	749.191	637.583			5 hours H2O control 1	94	984.784	675.371
5 hours 10 nM SAG 1	94	706.117	636.609			5 hours H2O control 1	95	1295.09	818.321
5 hours 10 nM SAG 1	95	1580.94	856.537			5 hours H2O control 1	96	1309.68	850.28
5 hours 10 nM SAG 1	96	1645.41	1131.14			5 hours H2O control 1	97	1290.48	717.52
5 hours 10 nM SAG 1	97	1430	948.409			5 hours H2O control 1	98	1136.2	810.854
5 hours 10 nM SAG 1	98	1212.68	803.566			5 hours H2O control 1	99	1244.83	1486.13
5 hours 10 nM SAG 1	99	1299.81	867.64			5 hours H2O control 1	100	1095.49	682.836
5 hours 10 nM SAG 1	100	1479.09	842.721			5 hours H2O control 1	101	1083.12	846.954
5 hours 10 nM SAG 1	101	1110.29	806.381			5 hours H2O control 1	102	1168.48	789.071
5 hours 10 nM SAG 1	102	1033.93	744.317			5 hours H2O control 1	103	1168.53	820.714
5 hours 10 nM SAG 1	103	2140.07	938.799			5 hours H2O control 1	104	1049.08	822.449
5 hours 10 nM SAG 1	104	1198.57	808.764			5 hours H2O control 1	105	892.28	743.106
5 hours 10 nM SAG 1	105	1474.07	812.398			5 hours H2O control 1	106	992.92	759.297
5 hours 10 nM SAG 1	106	1186.61	791.187			5 hours H2O control 1	107	1221.62	918.336
5 hours 10 nM SAG 1	107	1023.76	789.473			5 hours H2O control 1	108	1216.72	824.295
5 hours 10 nM SAG 1	108	1141.61	766.413			5 hours H2O control 1	109	1133.89	792.94
5 hours 10 nM SAG 1	109	1622.35	816.073			5 hours H2O control 1	110	1123.47	784.635
5 hours 10 nM SAG 1	110	1643.31	895.966			5 hours H2O control 1	111	1227.19	797.641
5 hours 10 nM SAG 1	111	1723.5	894.113			5 hours H2O control 1	112	988.298	738.079
5 hours 10 nM SAG 1	112	1294.85	966.644			5 hours H2O control 1	113	1194.05	795.271
5 hours 10 nM SAG 1	113	1349.03	833.263			5 hours H2O control 1	114	1121.61	744.983
5 hours 10 nM SAG 1	114	1494.84	822.722			5 hours H2O control 1	115	850.59	700.346
5 hours 10 nM SAG 1	115	1020.65	895.969			5 hours H2O control 1	116	1209.91	862.194
5 hours 10 nM SAG 1	116	635.359	592.218			5 hours H2O control 1	117	1172.57	828.959
5 hours 10 nM SAG 1	117	1427.97	891.427			5 hours H2O control 1	118	940.343	786.668
5 hours 10 nM SAG 1	118	1236.34	809.311			5 hours H2O control 1	119	844.842	702.197
5 hours 10 nM SAG 1	119	1404.43	1025.17			5 hours H2O control 1	120	1262.29	750.909
5 hours 10 nM SAG 1	120	1371.46	817.598			5 hours H2O control 1	121	1496.29	849.553
5 hours 10 nM SAG 1	121	1271.29	908.919			5 hours H2O control 1	122	1752.14	794.383
5 hours 10 nM SAG 1	122	1810.51	893.611			5 hours H2O control 1	123	2115.01	857.097
5 hours 10 nM SAG 1	123	1666.24	993.456			5 hours H2O control 1	124	1430.72	760.769
5 hours 10 nM SAG 1	124	1510.13	821.568			5 hours H2O control 1	125	840.025	667.143
5 hours 10 nM SAG 1	125	1538.17	837.174			5 hours H2O control 1	126	817.652	691.744
5 hours 10 nM SAG 1	126	1555.09	875.187			5 hours H2O control 1	127	811.143	726.585
5 hours 10 nM SAG 1	127	1534.12	846.08			5 hours H2O control 1	128	719.235	624.222
5 hours 10 nM SAG 1	128	1475.99	799.505			5 hours H2O control 1	129	846.632	673.266
5 hours 10 nM SAG 1	129	1407.69	845.872			5 hours H2O control 1	130	863.321	693.549
5 hours 10 nM SAG 1	130	1412.23	795.212			5 hours H2O control 1	131	1022.44	836.729
5 hours 10 nM SAG 1	131	1677.88	818.108			5 hours H2O control 1	132	1129.42	703.531
5 hours 10 nM SAG 1	132	1603.15	848.024			5 hours H2O control 1	133	695.194	673.566
5 hours 10 nM SAG 1	133	1488.89	797.968			5 hours H2O control 1	134	1304.88	881.294
5 hours 10 nM SAG 1	134	1586.01	820.014			5 hours H2O control 1	135	1019.57	748.829
5 hours 10 nM SAG 1	135	1180.17	843.553			5 hours H2O control 1	136	1247.18	784.175
5 hours 10 nM SAG 1	136	1491	888.699			5 hours H2O control 1	137	1126.89	726.267
5 hours 10 nM SAG 1	137	1644.92	857.197			5 hours H2O control 1	138	1196.19	707.425
5 hours 10 nM SAG 1	138	1674.21	842.647			5 hours H2O control 1	139	1315.18	757.717
5 hours 10 nM SAG 1	139	1754.96	849.658			5 hours H2O control 1	140	1170.74	759.885
5 hours 10 nM SAG 1	140	1610.9	892.957			5 hours H2O control 1	141	1008.42	710.808
5 hours 10 nM SAG 1	141	1817.11	991.659			5 hours H2O control 1	142	1254.38	716.815
5 hours 10 nM SAG 1	142	1770.96	857.127			5 hours H2O control 1	143	865.915	659.452
5 hours 10 nM SAG 1	143	1267.75	772.592			5 hours H2O control 1	144	1008.62	693.936
5 hours 10 nM SAG 1	144	1375.37	775.617			5 hours H2O control 1	145	857.091	649.645
5 hours 10 nM SAG 1	145	1094.15	749.691			5 hours H2O control 1	146	787.554	658.193
5 hours 10 nM SAG 1	146	1026.33	706.174			5 hours H2O control 1	147	853.282	671.788
5 hours 10 nM SAG 1	147	1440.52	832.36			5 hours H2O control 1	148	812.066	651.16
5 hours 10 nM SAG 1	148	1078.74	706.599			5 hours H2O control 1	149	756.018	614.028
5 hours 10 nM SAG 1	149	1182.59	732.585			5 hours H2O control 1	150	842.622	652.14
5 hours 10 nM SAG 1	150	1325.96	736.769			5 hours H2O control 1	151	860.884	644.928
5 hours 10 nM SAG 1	151	821.465	939.266			5 hours H2O control 1	152	753.942	631.45
5 hours 10 nM SAG 1	152	828.305	650.316			5 hours H2O control 1	153	1162.55	734.399
5 hours 10 nM SAG 1	153	850.084	733.824			5 hours H2O control 1	154	1012.23	657.87
5 hours 10 nM SAG 1	154	1182.91	727.941			5 hours H2O control 1	155	766.344	654.141
5 hours 10 nM SAG 1	155	1306.16	1092.96			5 hours H2O control 1	156	739.615	635.435
5 hours 10 nM SAG 1	156	1556.74	790.253			5 hours H2O control 1	157	909.657	648.95
5 hours 10 nM SAG 1	157	1217.01	744.787			5 hours H2O control 1	158	1199.81	688.641
5 hours 10 nM SAG 1	158	1536.42	813.077			5 hours H2O control 1	159	1170.13	690.703
5 hours 10 nM SAG 1	159	1245.43	754.09			5 hours H2O control 1	160	999.82	1507.49
5 hours 10 nM SAG 1	160	1175.76	728.218			5 hours H2O control 1	161	1298.96	674.364
5 hours 10 nM SAG 1	161	1201.38	743.302			5 hours H2O control 1	162	907.402	649.481
5 hours 10 nM SAG 1	162	987.599	710.183			5 hours H2O control 2	0	869.283	629.934
5 hours 10 nM SAG 1	163	880.095	711.801			5 hours H2O control 2	1	732.88	756.787
5 hours 10 nM SAG 1	164	1053.47	691.032			5 hours H2O control 2	2	827.796	767.535
5 hours 10 nM SAG 1	165	1521.77	767.103			5 hours H2O control 2	3	826.296	765.09
5 hours 10 nM SAG 1	166	1447.31	870.01			5 hours H2O control 2	4	1097.27	870.653
5 hours 10 nM SAG 1	167	1494.66	850.452			5 hours H2O control 2	5	824.484	671.676
5 hours 10 nM SAG 1	168	1610.58	814.191			5 hours H2O control 2	6	1002.08	750.4
5 hours 10 nM SAG 1	169	1452.29	830.504			5 hours H2O control 2	7	1241.45	730.534
5 hours 10 nM SAG 1	170	1358.34	757.421			5 hours H2O control 2	8	913.421	672.609
5 hours 10 nM SAG 1	171	1045.65	731.726			5 hours H2O control 2	9	1093.52	767.546
5 hours 10 nM SAG 1	172	988.68	694.091			5 hours H2O control 2	10	922.588	671.208
5 hours 10 nM SAG 1	173	1292.28	759.428			5 hours H2O control 2	11	1233.25	769.624
5 hours 10 nM SAG 1	174	1118.52	749.308			5 hours H2O control 2	12	939.63	732.713
5 hours 10 nM SAG 1	175	1658.01	815.717			5 hours H2O control 2	13	1116.81	773.53
5 hours 10 nM SAG 1	176	1046.2	778.535			5 hours H2O control 2	14	908.233	767.872
5 hours 10 nM SAG 1	177	1071.09	786.832			5 hours H2O control 2	15	848.378	865.477
5 hours 10 nM SAG 1	178	1598.08	2721.32			5 hours H2O control 2	16	824.384	768.712
5 hours 10 nM SAG 1	179	906.469	751.046			5 hours H2O control 2	17	975.301	731.582
5 hours 10 nM SAG 1	180	1447.79	813.993			5 hours H2O control 2	18	963.806	751.072
5 hours 10 nM SAG 1	181	1309.74	790.401			5 hours H2O control 2	19	1643.03	820.504
5 hours 10 nM SAG 1	182	1350.54	806.024			5 hours H2O control 2	20	1106.07	746.803
5 hours 10 nM SAG 1	183	1455.03	816.971			5 hours H2O control 2	21	1085.08	745.371
5 hours 10 nM SAG 1	184	995.817	784.229			5 hours H2O control 2	22	1169.08	791.198
5 hours 10 nM SAG 1	185	1332.73	796.179			5 hours H2O control 2	23	877.68	791.183
5 hours 10 nM SAG 1	186	1626.16	836.706			5 hours H2O control 2	24	1927.91	825.406
5 hours 10 nM SAG 1	187	1430.07	825.745			5 hours H2O control 2	25	1065.46	901.996
5 hours 10 nM SAG 1	188	1190.04	801.975			5 hours H2O control 2	26	792.268	751.117
5 hours 10 nM SAG 1	189	1747.93	818.969			5 hours H2O control 2	27	1002.73	739.75
5 hours 10 nM SAG 1	190	1483.24	1037			5 hours H2O control 2	28	852.233	737.748
5 hours 10 nM SAG 1	191	1655.98	835.901			5 hours H2O control 2	29	932.792	743.615
5 hours 10 nM SAG 1	192	1124.26	804.292			5 hours H2O control 2	30	652.373	658.015
5 hours 10 nM SAG 1	193	901.16	710.064			5 hours H2O control 2	31	658.937	624.327
5 hours 10 nM SAG 1	194	1108.28	809.475			5 hours H2O control 2	32	625.927	658.448
5 hours 10 nM SAG 1	195	1131.57	808.177			5 hours H2O control 2	33	628.459	623.771
5 hours 10 nM SAG 1	196	1563.33	844.195			5 hours H2O control 2	34	587.782	588.238
5 hours 10 nM SAG 1	197	1530.03	878.482			5 hours H2O control 2	35	836.299	681.241
5 hours 10 nM SAG 1	198	1061.08	749.597			5 hours H2O control 2	36	724.972	696.703
5 hours 10 nM SAG 1	199	1264.24	799.375			5 hours H2O control 2	37	688.353	654.778
5 hours 10 nM SAG 1	200	884.355	700.307			5 hours H2O control 2	38	689.7	618.159
5 hours 10 nM SAG 1	201	694.366	626.197			5 hours H2O control 2	39	827.402	657.822
5 hours 10 nM SAG 1	202	737.318	635.147			5 hours H2O control 2	40	731.058	656.126
5 hours 10 nM SAG 1	203	734.312	633.955			5 hours H2O control 2	41	627.278	617.485
5 hours 10 nM SAG 1	204	668.477	625.031			5 hours H2O control 2	42	688.827	658.271
5 hours 10 nM SAG 1	205	661.602	623.641			5 hours H2O control 2	43	786.773	712.73
5 hours 10 nM SAG 1	206	681.858	604.674			5 hours H2O control 2	44	680.157	664.65
5 hours 10 nM SAG 1	207	713.896	625.278			5 hours H2O control 2	45	613.394	628.604
5 hours 10 nM SAG 1	208	680.337	619.17			5 hours H2O control 2	46	733.759	777.307
5 hours 10 nM SAG 1	209	665.757	612.907			5 hours H2O control 2	47	739.639	699.326
5 hours 10 nM SAG 1	210	802.215	642.66			5 hours H2O control 2	48	791.647	624.737
5 hours 10 nM SAG 1	211	984.737	672.567			5 hours H2O control 2	49	726.713	704.97
5 hours 10 nM SAG 1	212	821.032	643.503			5 hours H2O control 2	50	661.658	596.144
5 hours 10 nM SAG 1	213	797.074	644.64			5 hours H2O control 2	51	1016	703.966
5 hours 10 nM SAG 1	214	773.074	645.187			5 hours H2O control 2	52	914.816	735.444
5 hours 10 nM SAG 1	215	687.735	637.684			5 hours H2O control 2	53	689.857	689.284
5 hours 10 nM SAG 1	216	1012.49	707.912			5 hours H2O control 2	54	668.643	660.989
5 hours 10 nM SAG 1	217	893.974	700.464			5 hours H2O control 2	55	848.05	733.238
5 hours 10 nM SAG 1	218	800.122	653.375			5 hours H2O control 2	56	968.82	854.682
5 hours 10 nM SAG 1	219	1649.71	902.015			5 hours H2O control 2	57	819.416	708.461
5 hours 10 nM SAG 1	220	1317.33	818.108			5 hours H2O control 2	58	843.411	710.799
5 hours 10 nM SAG 1	221	1381.18	813.642			5 hours H2O control 2	59	781.459	769.135
5 hours 10 nM SAG 1	222	1776.64	842.868			5 hours H2O control 2	60	780.903	696.154
5 hours 10 nM SAG 1	223	1543.44	1089.14			5 hours H2O control 2	61	1069.09	727.778
5 hours 10 nM SAG 1	224	1794.09	818.11			5 hours H2O control 2	62	892.76	708.823
5 hours 10 nM SAG 1	225	1329.44	770.693			5 hours H2O control 2	63	876.274	662.942
5 hours 10 nM SAG 1	226	1832.77	857.651			5 hours H2O control 2	64	1274.15	764.111
5 hours 10 nM SAG 1	227	1456.9	813.055			5 hours H2O control 2	65	1041.45	733.806
5 hours 10 nM SAG 1	228	1437.29	821.749			5 hours H2O control 2	66	875.562	719.534
5 hours 10 nM SAG 1	229	1358.14	838.077			5 hours H2O control 2	67	1282.83	759.118
5 hours 10 nM SAG 1	230	1595.51	797.56			5 hours H2O control 2	68	924.345	693.977
5 hours 10 nM SAG 1	231	1108.19	796.967			5 hours H2O control 2	69	862.115	753.635
5 hours 10 nM SAG 1	232	1155.76	749.422			5 hours H2O control 2	70	1016.96	742.085
5 hours 10 nM SAG 1	233	1656.59	890.942			5 hours H2O control 2	71	1655.16	751.179
5 hours 10 nM SAG 1	234	1446.79	842.903			5 hours H2O control 2	72	828.431	663.652
5 hours 10 nM SAG 1	235	1590.43	849.506			5 hours H2O control 2	73	790.456	736.398
5 hours 10 nM SAG 1	236	1201.97	771.325			5 hours H2O control 2	74	819.673	720.418
5 hours 10 nM SAG 1	237	1963.22	890.429			5 hours H2O control 2	75	658.862	679.38
5 hours 10 nM SAG 1	238	1918.74	889.869			5 hours H2O control 2	76	698.886	681.207
5 hours 10 nM SAG 1	239	1993.48	953.043			5 hours H2O control 2	77	1033.15	748.21
5 hours 10 nM SAG 1	240	1760.27	852.483			5 hours H2O control 2	78	1114.6	723.308
5 hours 10 nM SAG 1	241	1740.2	863.435			5 hours H2O control 2	79	851.697	757.952
5 hours 10 nM SAG 1	242	1596.17	896.988			5 hours H2O control 2	80	925.541	651.64
5 hours 10 nM SAG 1	243	1219.07	807.988			5 hours H2O control 2	81	603.888	580.022
5 hours 10 nM SAG 1	244	1185.35	817.81			5 hours H2O control 2	82	670.851	596.77
5 hours 10 nM SAG 1	245	1242.51	823.482			5 hours H2O control 2	83	620.89	576.316
5 hours 10 nM SAG 1	246	1447.03	844.549			5 hours H2O control 2	84	732.232	702.723
5 hours 10 nM SAG 1	247	1335.67	829.285			5 hours H2O control 2	85	742.506	618.978
5 hours 10 nM SAG 1	248	1265.18	788.668			5 hours H2O control 2	86	1002.72	670.028
5 hours 10 nM SAG 1	249	877.904	783.833			5 hours H2O control 2	87	738.579	683.296
5 hours 10 nM SAG 1	250	1100.25	803.012			5 hours H2O control 2	88	1013.17	676.162
5 hours 10 nM SAG 1	251	1178.45	828.061			5 hours H2O control 2	89	805.051	622.129
5 hours 10 nM SAG 1	252	1179.08	773.966			5 hours H2O control 2	90	1346.27	817.559
5 hours 10 nM SAG 1	253	1248.74	792.723			5 hours H2O control 2	91	784.32	771.935
5 hours 10 nM SAG 1	254	1281.9	827.416			5 hours H2O control 2	92	760.297	727.865
5 hours 10 nM SAG 1	255	1247.53	756.876			5 hours H2O control 2	93	821.92	733.074
5 hours 10 nM SAG 1	256	1172.19	801.627			5 hours H2O control 2	94	968.705	717.025
5 hours 10 nM SAG 1	257	1126.64	747.699			5 hours H2O control 2	95	1064.81	743.464
5 hours 10 nM SAG 1	258	918.982	722.318			5 hours H2O control 2	96	1107.82	741.055
5 hours 10 nM SAG 1	259	952.628	707.396			5 hours H2O control 2	97	805.644	788.764
5 hours 10 nM SAG 1	260	1353.21	845.121			5 hours H2O control 2	98	965.197	754.722
5 hours 10 nM SAG 1	261	1043.55	902.417			5 hours H2O control 2	99	985.571	777.816
5 hours 10 nM SAG 1	262	1030.74	771.06			5 hours H2O control 2	100	1010.97	772.45
5 hours 10 nM SAG 1	263	1002.99	711.363			5 hours H2O control 2	101	800.803	746.514
5 hours 10 nM SAG 1	264	1020.71	877.553			5 hours H2O control 2	102	880.243	734.166
5 hours 10 nM SAG 1	265	917.758	795.009			5 hours H2O control 2	103	1140.81	731.395
5 hours 10 nM SAG 1	266	1293.99	831.889			5 hours H2O control 2	104	856.256	731.46
5 hours 10 nM SAG 1	267	891.422	712.464			5 hours H2O control 2	105	877.913	789.287
5 hours 10 nM SAG 1	268	901	779.006			5 hours H2O control 2	106	1172.4	786.398
5 hours 10 nM SAG 1	269	1006.28	728.335			5 hours H2O control 2	107	1129.34	759.915
5 hours 10 nM SAG 1	270	932.209	755.889			5 hours H2O control 2	108	880.348	810.384
5 hours 10 nM SAG 1	271	1269.42	775.687			5 hours H2O control 2	109	994.91	789.14
5 hours 10 nM SAG 1	272	956.474	715.631			5 hours H2O control 2	110	861.634	741.035
5 hours 10 nM SAG 1	273	1001.99	719.255			5 hours H2O control 2	111	930.106	734.544
5 hours 10 nM SAG 1	274	1444.23	788.159			5 hours H2O control 2	112	838.964	729.973
5 hours 10 nM SAG 1	275	1079.24	750.371			5 hours H2O control 2	113	875.083	724.121
5 hours 10 nM SAG 1	276	950.765	715.71			5 hours H2O control 2	114	795.451	768.631
5 hours 10 nM SAG 1	277	1026.7	699.815			5 hours H2O control 2	115	1136.37	813.235
5 hours 10 nM SAG 1	278	1367.14	787.532			5 hours H2O control 2	116	1376.79	825.115
5 hours 10 nM SAG 1	279	1112.06	746.668			5 hours H2O control 2	117	819.563	772.631
5 hours 10 nM SAG 1	280	1228.9	777.48			5 hours H2O control 2	118	915.942	742.78
5 hours 10 nM SAG 1	281	1021.02	711.052			5 hours H2O control 2	119	714.662	655.013
5 hours 10 nM SAG 1	282	970.927	767.434			5 hours H2O control 2	120	795.804	709.171
5 hours 10 nM SAG 2	0	732.384	658.43			5 hours H2O control 2	121	955.558	841.532
5 hours 10 nM SAG 2	1	1507.93	873.132			5 hours H2O control 2	122	842.969	684.687
5 hours 10 nM SAG 2	2	2382.69	3404.01			5 hours H2O control 2	123	811.324	733.654
5 hours 10 nM SAG 2	3	1656.84	882.586			5 hours H2O control 2	124	976.846	819.409
5 hours 10 nM SAG 2	4	912.818	769.312			5 hours H2O control 2	125	1030.51	775.705
5 hours 10 nM SAG 2	5	1729.07	861.636			5 hours H2O control 2	126	887.735	733.19
5 hours 10 nM SAG 2	6	964.664	798.882			5 hours H2O control 2	127	954.349	814.388
5 hours 10 nM SAG 2	7	1458.11	871.456			5 hours H2O control 2	128	1006.34	776.414
5 hours 10 nM SAG 2	8	1981.88	984.226			5 hours H2O control 2	129	1074.59	857.531
5 hours 10 nM SAG 2	9	1043.41	803.686			5 hours H2O control 2	130	695.374	684.09
5 hours 10 nM SAG 2	10	1829.04	1017.62			5 hours H2O control 2	131	786.187	776.221
5 hours 10 nM SAG 2	11	2294.52	1129.5			5 hours H2O control 2	132	802.84	717.105
5 hours 10 nM SAG 2	12	1429.37	840.232			5 hours H2O control 2	133	795	772.807
5 hours 10 nM SAG 2	13	1511.03	977.115			5 hours H2O control 2	134	748.632	759.904
5 hours 10 nM SAG 2	14	2397.45	960.631			5 hours H2O control 2	135	759.217	738.155
5 hours 10 nM SAG 2	15	2006.85	893.203			5 hours H2O control 2	136	789.903	757.061
5 hours 10 nM SAG 2	16	1874.75	915.956			5 hours H2O control 2	137	841.596	735.97
5 hours 10 nM SAG 2	17	2040.47	1487.62			5 hours H2O control 2	138	1014.12	795.596
5 hours 10 nM SAG 2	18	1624.09	1724.79			5 hours H2O control 2	139	805.581	726.832
5 hours 10 nM SAG 2	19	1216.5	804.718			5 hours H2O control 2	140	781.766	748.525
5 hours 10 nM SAG 2	20	2260.56	909.226			5 hours H2O control 2	141	818.083	792.683
5 hours 10 nM SAG 2	21	2269.72	888.004			5 hours H2O control 2	142	1089.95	832.048
5 hours 10 nM SAG 2	22	1836.23	837.956			5 hours H2O control 2	143	819.497	778.98
5 hours 10 nM SAG 2	23	2092.02	993.133			5 hours H2O control 2	144	907.907	755.133
5 hours 10 nM SAG 2	24	2510.45	1232.11			5 hours H2O control 2	145	909.46	865.705
5 hours 10 nM SAG 2	25	2074.33	1882.14			5 hours H2O control 2	146	1223.56	1531.22
5 hours 10 nM SAG 2	26	1872.02	2183.25			5 hours H2O control 2	147	918.319	815.876
5 hours 10 nM SAG 2	27	1375.69	775.437			5 hours H2O control 2	148	1306.32	1022.91
5 hours 10 nM SAG 2	28	1475.33	837.491			5 hours H2O control 2	149	832.741	782.49
5 hours 10 nM SAG 2	29	2016.02	961.991			5 hours H2O control 2	150	1068.37	805.945
5 hours 10 nM SAG 2	30	2024.23	1370.9			5 hours H2O control 2	151	885.259	764.249
5 hours 10 nM SAG 2	31	2987.15	1081.24			5 hours H2O control 2	152	915.284	777.322
5 hours 10 nM SAG 2	32	1998.2	7721.69			5 hours H2O control 2	153	863.57	765.121
5 hours 10 nM SAG 2	33	1552.62	6796.31			5 hours H2O control 2	154	856.193	744.055
5 hours 10 nM SAG 2	34	1800.13	1118.08			5 hours H2O control 2	155	847.215	734.372
5 hours 10 nM SAG 2	35	1622.97	3188.16			5 hours H2O control 2	156	820.747	799.888
5 hours 10 nM SAG 2	36	1127.35	992.268			5 hours H2O control 2	157	875.018	747.534
5 hours 10 nM SAG 2	37	973.474	702.701			5 hours H2O control 2	158	857.378	745.479
5 hours 10 nM SAG 2	38	1037.97	932.809			5 hours H2O control 2	159	732.7	700.768
5 hours 10 nM SAG 2	39	1500.97	969.642			5 hours H2O control 2	160	921.366	737.909
5 hours 10 nM SAG 2	40	1035.42	728.02			5 hours H2O control 2	161	841.802	731.885
5 hours 10 nM SAG 2	41	1258.58	752.925			5 hours H2O control 2	162	876.415	955.239
5 hours 10 nM SAG 2	42	1037.5	748.822			5 hours H2O control 2	163	816.618	938.15
5 hours 10 nM SAG 2	43	1392.55	802.059			5 hours H2O control 2	164	844.142	759.205
5 hours 10 nM SAG 2	44	1446.26	785.764			5 hours H2O control 2	165	847.314	682.556
5 hours 10 nM SAG 2	45	989.628	764.036			5 hours H2O control 2	166	771.131	731.455
5 hours 10 nM SAG 2	46	1302.15	1140.34			5 hours H2O control 2	167	709.519	739.775
5 hours 10 nM SAG 2	47	1483.52	838.075			5 hours H2O control 3	0	723.408	744.927
5 hours 10 nM SAG 2	48	1258.87	770.452			5 hours H2O control 3	1	914.619	734.667
5 hours 10 nM SAG 2	49	1159.01	780.926			5 hours H2O control 3	2	764.22	739.332
5 hours 10 nM SAG 2	50	1187.25	759.61			5 hours H2O control 3	3	831.024	816.633
5 hours 10 nM SAG 2	51	1321.76	794.692			5 hours H2O control 3	4	696.019	643.39
5 hours 10 nM SAG 2	52	1404.96	768.67			5 hours H2O control 3	5	714.515	670.421
5 hours 10 nM SAG 2	53	1456.13	844.947			5 hours H2O control 3	6	709.264	620.42
5 hours 10 nM SAG 2	54	1388.09	773.319			5 hours H2O control 3	7	671.416	606.031
5 hours 10 nM SAG 2	55	1356.69	826.05			5 hours H2O control 3	8	668.004	628.874
5 hours 10 nM SAG 2	56	1245.22	865.449			5 hours H2O control 3	9	769.413	648.952
5 hours 10 nM SAG 2	57	2779.35	1067.06			5 hours H2O control 3	10	1396.57	662.873
5 hours 10 nM SAG 2	58	2804.49	1014.86			5 hours H2O control 3	11	683.951	610.276
5 hours 10 nM SAG 2	59	2392.01	972.909			5 hours H2O control 3	12	670.989	632.481
5 hours 10 nM SAG 2	60	2558.93	1023.61			5 hours H2O control 3	13	640.388	603.687
5 hours 10 nM SAG 2	61	2970.07	943.605			5 hours H2O control 3	14	996.626	700.252
5 hours 10 nM SAG 2	62	2416.8	886.472			5 hours H2O control 3	15	752.757	668.679
5 hours 10 nM SAG 2	63	1308.35	848.091			5 hours H2O control 3	16	1097.48	699.638
5 hours 10 nM SAG 2	64	2020.54	839.506			5 hours H2O control 3	17	894.12	654.682
5 hours 10 nM SAG 2	65	1483.04	817.351			5 hours H2O control 3	18	670.184	585.307
5 hours 10 nM SAG 2	66	1392.47	879.639			5 hours H2O control 3	19	899.844	711.669
5 hours 10 nM SAG 2	67	884.844	838.391			5 hours H2O control 3	20	972.651	666.657
5 hours 10 nM SAG 2	68	2074.64	1226.96			5 hours H2O control 3	21	735.352	664.771
5 hours 10 nM SAG 2	69	1450.99	799.915			5 hours H2O control 3	22	977.205	698.485
5 hours 10 nM SAG 2	70	1176.28	902.802			5 hours H2O control 3	23	1028.26	702.681
5 hours 10 nM SAG 2	71	1404.43	4231.22			5 hours H2O control 3	24	1014.79	742.21
5 hours 10 nM SAG 2	72	1347.61	5190.65			5 hours H2O control 3	25	689.192	706.331
5 hours 10 nM SAG 2	73	923.474	860.974			5 hours H2O control 3	26	643.098	674.827
5 hours 10 nM SAG 2	74	1276.95	1376.46			5 hours H2O control 3	27	646.48	627.271
5 hours 10 nM SAG 2	75	1152.4	807.107			5 hours H2O control 3	28	643.458	730.584
5 hours 10 nM SAG 2	76	1776.59	7614.52			5 hours H2O control 3	29	625.43	675.359
5 hours 10 nM SAG 2	77	1196.76	799.18			5 hours H2O control 3	30	961.635	723.17
5 hours 10 nM SAG 2	78	1406.05	4031.15			5 hours H2O control 3	31	844.429	761.943
5 hours 10 nM SAG 2	79	1717.84	1041.37			5 hours H2O control 3	32	885.98	788.895
5 hours 10 nM SAG 2	80	1856.42	6673.56			5 hours H2O control 3	33	751.998	729.687
5 hours 10 nM SAG 2	81	1794	5373.03			5 hours H2O control 3	34	852.964	1225.08
5 hours 10 nM SAG 2	82	1342.14	780.048			5 hours H2O control 3	35	756.363	711.67
5 hours 10 nM SAG 2	83	1461.65	1045.27			5 hours H2O control 3	36	778.457	765.798
5 hours 10 nM SAG 2	84	1314.94	938.747			5 hours H2O control 3	37	818.905	789.2
5 hours 10 nM SAG 2	85	1400.31	1036.85			5 hours H2O control 3	38	798.914	786.618
5 hours 10 nM SAG 2	86	921.402	781.948			5 hours H2O control 3	39	1152.22	908.727
5 hours 10 nM SAG 2	87	1467.46	907.655			5 hours H2O control 3	40	839.104	869.042
5 hours 10 nM SAG 2	88	1734.8	817.858			5 hours H2O control 3	41	748.096	745.679
5 hours 10 nM SAG 2	89	1734.67	810.478			5 hours H2O control 3	42	978.348	729.838
5 hours 10 nM SAG 2	90	1602.99	1167.57			5 hours H2O control 3	43	730.507	756.266
5 hours 10 nM SAG 2	91	1000.71	1111.69			5 hours H2O control 3	44	809.705	777.162
5 hours 10 nM SAG 2	92	1362.39	810.16			5 hours H2O control 3	45	829.231	784.416
5 hours 10 nM SAG 2	93	1327.32	793.807			5 hours H2O control 3	46	1753.71	3315.55
5 hours 10 nM SAG 2	94	1461.48	820.097			5 hours H2O control 3	47	1145.44	922.764
5 hours 10 nM SAG 2	95	1140.51	824.77			5 hours H2O control 3	48	856.515	791.906
5 hours 10 nM SAG 2	96	1610.02	810.235			5 hours H2O control 3	49	776.48	720.905
5 hours 10 nM SAG 2	97	970.821	781.368			5 hours H2O control 3	50	793.007	718.429
5 hours 10 nM SAG 2	98	1393.37	792.292			5 hours H2O control 3	51	732.637	730.152
5 hours 10 nM SAG 2	99	1458.42	797.232			5 hours H2O control 3	52	826.929	804.481
5 hours 10 nM SAG 2	100	971.556	1011.07			5 hours H2O control 3	53	800.408	771.956
5 hours 10 nM SAG 2	101	2316.11	1025.23			5 hours H2O control 3	54	767.963	766.601
5 hours 10 nM SAG 2	102	1076.77	906.56			5 hours H2O control 3	55	1227.58	3000.38
5 hours 10 nM SAG 2	103	854.804	823.68			5 hours H2O control 3	56	897.698	800.752
5 hours 10 nM SAG 2	104	860.325	703.918			5 hours H2O control 3	57	847	810.299
5 hours 10 nM SAG 2	105	2137.39	9738.02			5 hours H2O control 3	58	971.223	1182.06
5 hours 10 nM SAG 2	106	2089.09	13560.7			5 hours H2O control 3	59	833.151	848.654
5 hours 10 nM SAG 2	107	2114.36	5390.19			5 hours H2O control 3	60	829.406	914.873
5 hours 10 nM SAG 2	108	1944.24	7614.48			5 hours H2O control 3	61	861.625	799.231
5 hours 10 nM SAG 2	109	1983.23	17145.7			5 hours H2O control 3	62	779.407	748.309
5 hours 10 nM SAG 2	110	1968.53	18849			5 hours H2O control 3	63	814.976	752.791
5 hours 10 nM SAG 2	111	1508.64	834.111			5 hours H2O control 3	64	712.647	646.232
5 hours 10 nM SAG 2	112	1761.78	14280.9			5 hours H2O control 3	65	841.218	786.004
5 hours 10 nM SAG 2	113	1121.88	1961.71			5 hours H2O control 3	66	748.82	682.86
5 hours 10 nM SAG 2	114	1543.14	5116.07			5 hours H2O control 3	67	1169.29	730.934
5 hours 10 nM SAG 2	115	2780.19	11014			5 hours H2O control 3	68	1306.05	735.002
5 hours 10 nM SAG 2	116	998.135	881.191			5 hours H2O control 3	69	1050.38	716.647
5 hours 10 nM SAG 2	117	1855.39	909.278			5 hours H2O control 3	70	729.09	707.774
5 hours 10 nM SAG 2	118	828.428	793.297			5 hours H2O control 3	71	761.127	652.849
5 hours 10 nM SAG 2	119	1546.67	2587.15			5 hours H2O control 3	72	1081.87	731.437
5 hours 10 nM SAG 2	120	1633.53	3460.52			5 hours H2O control 3	73	1140.66	780.747
5 hours 10 nM SAG 2	121	1447.14	2735.84			5 hours H2O control 3	74	1159.56	736.106
5 hours 10 nM SAG 2	122	1418.94	4288.96			5 hours H2O control 3	75	812.581	713.347
5 hours 10 nM SAG 2	123	1442.55	2001.57			5 hours H2O control 3	76	834.334	708.298
5 hours 10 nM SAG 2	124	1785.86	2668.75			5 hours H2O control 3	77	985.727	693.606
5 hours 10 nM SAG 2	125	2079.49	6524.5			5 hours H2O control 3	78	868.974	669.422
5 hours 10 nM SAG 2	126	1577	3546.47			5 hours H2O control 3	79	810.887	683.976
5 hours 10 nM SAG 2	127	1477.87	3103.45			5 hours H2O control 3	80	802.029	709.893
5 hours 10 nM SAG 2	128	1234.58	6893.16			5 hours H2O control 3	81	1016.03	714.11
5 hours 10 nM SAG 2	129	1050.35	5055.59			5 hours H2O control 3	82	768.226	758.366
5 hours 10 nM SAG 2	130	819.768	951.871			5 hours H2O control 3	83	776.641	703.097
5 hours 10 nM SAG 2	131	1825.16	3747.01			5 hours H2O control 3	84	774.641	690.985
5 hours 10 nM SAG 2	132	1277.31	1833			5 hours H2O control 3	85	833.066	707.049
5 hours 10 nM SAG 2	133	1571.19	5003.94			5 hours H2O control 3	86	811.526	707.526
5 hours 10 nM SAG 2	134	1640.93	1117.12			5 hours H2O control 3	87	759.557	758.111
5 hours 10 nM SAG 2	135	1144.63	871.543			5 hours H2O control 3	88	793.576	719.406
5 hours 10 nM SAG 2	136	803.778	1220.72			5 hours H2O control 3	89	997.348	685.987
5 hours 10 nM SAG 2	137	902.329	701.721			5 hours H2O control 3	90	1012.22	738.237
5 hours 10 nM SAG 2	138	1282.84	1941.28			5 hours H2O control 3	91	840.978	735.914
5 hours 10 nM SAG 2	139	1927.92	891.427			5 hours H2O control 3	92	863.174	683.143
5 hours 10 nM SAG 2	140	804.462	953.43			5 hours H2O control 3	93	1074.15	722.57
5 hours 10 nM SAG 2	141	963.489	702.244			5 hours H2O control 3	94	1010.17	724.741
5 hours 10 nM SAG 2	142	930.964	864			5 hours H2O control 3	95	801.302	755.277
5 hours 10 nM SAG 2	143	935.947	730.35			5 hours H2O control 3	96	1327.61	863.659
5 hours 10 nM SAG 2	144	1151.91	1767.79			5 hours H2O control 3	97	942.873	800.384
5 hours 10 nM SAG 2	145	1272.66	2607.48			5 hours H2O control 3	98	918.076	806.222
5 hours 10 nM SAG 2	146	1338.89	1832.28			5 hours H2O control 3	99	992.181	826.417
5 hours 10 nM SAG 2	147	1230.49	1587.53			5 hours H2O control 3	100	989.395	1049.85
5 hours 10 nM SAG 2	148	1343.7	3256.53			5 hours H2O control 3	101	886.509	806.433
5 hours 10 nM SAG 2	149	1089.83	1328.61			5 hours H2O control 3	102	864.169	841.71
5 hours 10 nM SAG 2	150	1682.78	6722.94			5 hours H2O control 3	103	869.151	804.704
5 hours 10 nM SAG 2	151	764.212	859.331			5 hours H2O control 3	104	821.404	875.543
5 hours 10 nM SAG 2	152	781.377	873.416			5 hours H2O control 3	105	857.743	771.092
5 hours 10 nM SAG 3	0	878.573	756.442			5 hours H2O control 3	106	822.226	748.67
5 hours 10 nM SAG 3	1	1011.13	799.428			5 hours H2O control 3	107	1334.24	734.539
5 hours 10 nM SAG 3	2	831.097	743.423			5 hours H2O control 3	108	853.461	738.72
5 hours 10 nM SAG 3	3	740.997	732.564			5 hours H2O control 3	109	859.596	829.815
5 hours 10 nM SAG 3	4	1313.28	1111.43			5 hours H2O control 3	110	1052.3	818.71
5 hours 10 nM SAG 3	5	759.572	752.486			5 hours H2O control 3	111	866.016	812.341
5 hours 10 nM SAG 3	6	1603.82	1039.23			5 hours H2O control 3	112	975.041	838.271
5 hours 10 nM SAG 3	7	769.558	754.277			5 hours H2O control 3	113	1083.82	799.817
5 hours 10 nM SAG 3	8	1221.44	1065.56			5 hours H2O control 3	114	993.111	833.783
5 hours 10 nM SAG 3	9	1366.26	1029.08			5 hours H2O control 3	115	1408.93	861.709
5 hours 10 nM SAG 3	10	1322.15	986.527			5 hours H2O control 3	116	1028.29	1097.08
5 hours 10 nM SAG 3	11	1251.58	1007.21			5 hours H2O control 3	117	1298.82	1509.14
5 hours 10 nM SAG 3	12	1442.1	1024.43			5 hours H2O control 3	118	878.5	715.868
5 hours 10 nM SAG 3	13	825.571	879.315			5 hours H2O control 3	119	984.354	795.828
5 hours 10 nM SAG 3	14	932.037	1088.35			5 hours H2O control 3	120	967.604	724.247
5 hours 10 nM SAG 3	15	863.396	748.26			5 hours H2O control 3	121	1126.42	864.329
5 hours 10 nM SAG 3	16	1564.99	994.811			5 hours H2O control 3	122	1044.7	961.653
5 hours 10 nM SAG 3	17	920.508	746.531			5 hours H2O control 3	123	970.958	782.905
5 hours 10 nM SAG 3	18	880.116	746.911			5 hours H2O control 3	124	982.705	857.012
5 hours 10 nM SAG 3	19	1016.26	748.682			5 hours H2O control 3	125	914.098	774.69
5 hours 10 nM SAG 3	20	1508.8	930.089			5 hours H2O control 3	126	1013.98	892.597
5 hours 10 nM SAG 3	21	765.03	769.651			5 hours H2O control 3	127	973.621	813.393
5 hours 10 nM SAG 3	22	858.844	690.23			5 hours H2O control 3	128	975.067	756.708
5 hours 10 nM SAG 3	23	833.811	655.652			5 hours H2O control 3	129	851.906	775.403
5 hours 10 nM SAG 3	24	695.006	622.065			5 hours H2O control 3	130	871.988	802.056
5 hours 10 nM SAG 3	25	662.938	610.702			5 hours H2O control 3	131	863.228	765.95
5 hours 10 nM SAG 3	26	974.474	680.182			5 hours H2O control 3	132	1102.12	761.597
5 hours 10 nM SAG 3	27	851.037	723.777			5 hours H2O control 3	133	996.936	813.019
5 hours 10 nM SAG 3	28	973.191	678.103			5 hours H2O control 3	134	1075.41	767.035
5 hours 10 nM SAG 3	29	872.651	648.747			5 hours H2O control 3	135	1377.85	810.278
5 hours 10 nM SAG 3	30	725.195	620.634			5 hours H2O control 3	136	953.898	898.387
5 hours 10 nM SAG 3	31	800.289	690.365			5 hours H2O control 3	137	1187.77	803.352
5 hours 10 nM SAG 3	32	987.401	701.67			5 hours H2O control 3	138	1037.62	881.777
5 hours 10 nM SAG 3	33	871.642	717.392			5 hours H2O control 3	139	1027.1	870.801
5 hours 10 nM SAG 3	34	910.645	700.433			5 hours H2O control 3	140	1063.55	790.347
5 hours 10 nM SAG 3	35	795.208	687.227			5 hours H2O control 3	141	1110.35	789.88
5 hours 10 nM SAG 3	36	941.877	721.361			5 hours H2O control 3	142	1236.9	901.139
5 hours 10 nM SAG 3	37	836.028	695.469			5 hours H2O control 3	143	1246.26	892.701
5 hours 10 nM SAG 3	38	676.888	782.923			5 hours H2O control 3	144	2096.11	886.116
5 hours 10 nM SAG 3	39	1161.11	769.464			5 hours H2O control 3	145	1082.98	923.313
5 hours 10 nM SAG 3	40	961.348	905.641			5 hours H2O control 3	146	1134.42	730.532
5 hours 10 nM SAG 3	41	1007.98	928.938			5 hours H2O control 3	147	1636.18	757.075
5 hours 10 nM SAG 3	42	984.898	787.905			5 hours H2O control 3	148	1148.92	789.137
5 hours 10 nM SAG 3	43	972.474	806.611			5 hours H2O control 3	149	1313.52	734.339
5 hours 10 nM SAG 3	44	970.009	1112.4			5 hours H2O control 3	150	805.116	689.564
5 hours 10 nM SAG 3	45	776.261	763.553			5 hours H2O control 3	151	812.181	715.509
5 hours 10 nM SAG 3	46	998.748	870.566			5 hours H2O control 4	0	1348.62	761.027
5 hours 10 nM SAG 3	47	984.795	841.383			5 hours H2O control 4	1	1243.89	851.831
5 hours 10 nM SAG 3	48	1002.9	769.433			5 hours H2O control 4	2	1605.66	921.511
5 hours 10 nM SAG 3	49	820.086	735.358			5 hours H2O control 4	3	2164.45	1428.96
5 hours 10 nM SAG 3	50	783.834	733.256			5 hours H2O control 4	4	1106.6	773.307
5 hours 10 nM SAG 3	51	891.437	729.516			5 hours H2O control 4	5	1479.88	1179.88
5 hours 10 nM SAG 3	52	871.856	803.128			5 hours H2O control 4	6	1262.8	814.037
5 hours 10 nM SAG 3	53	820.317	720.741			5 hours H2O control 4	7	1681.21	1105.62
5 hours 10 nM SAG 3	54	925.543	716.905			5 hours H2O control 4	8	1155.43	800.678
5 hours 10 nM SAG 3	55	927.809	709.737			5 hours H2O control 4	9	1289.18	896.616
5 hours 10 nM SAG 3	56	887.302	727.548			5 hours H2O control 4	10	2348.39	3358.4
5 hours 10 nM SAG 3	57	706.623	679.644			5 hours H2O control 4	11	1326.93	931.136
5 hours 10 nM SAG 3	58	776.654	831.66			5 hours H2O control 4	12	1859.36	1341.57
5 hours 10 nM SAG 3	59	902.213	861.837			5 hours H2O control 4	13	1472.59	927.6
5 hours 10 nM SAG 3	60	820.028	753.138			5 hours H2O control 4	14	1459.16	1007.08
5 hours 10 nM SAG 3	61	744.638	753.035			5 hours H2O control 4	15	1396.68	948.154
5 hours 10 nM SAG 3	62	834.43	750.131			5 hours H2O control 4	16	1577.41	1025.55
5 hours 10 nM SAG 3	63	977.131	779.928			5 hours H2O control 4	17	1510.94	1074.97
5 hours 10 nM SAG 3	64	807.572	771.506			5 hours H2O control 4	18	1556.49	880.561
5 hours 10 nM SAG 3	65	896.988	765.446			5 hours H2O control 4	19	1600.4	2817.31
5 hours 10 nM SAG 3	66	817.919	981.587			5 hours H2O control 4	20	1552.47	1230.99
5 hours 10 nM SAG 3	67	873.916	741.424			5 hours H2O control 4	21	1728.22	1282.53
5 hours 10 nM SAG 3	68	886.767	718.564			5 hours H2O control 4	22	832.063	730.836
5 hours 10 nM SAG 3	69	837.835	806.925			5 hours H2O control 4	23	1038.04	1515.6
5 hours 10 nM SAG 3	70	770.505	719.888			5 hours H2O control 4	24	1304.47	872.496
5 hours 10 nM SAG 3	71	963.647	767.717			5 hours H2O control 4	25	876.195	748.831
5 hours 10 nM SAG 3	72	833.167	727.11			5 hours H2O control 4	26	1653.53	880.562
5 hours 10 nM SAG 3	73	1053.28	1231.55			5 hours H2O control 4	27	1193.94	1145.26
5 hours 10 nM SAG 3	74	849.111	736.616			5 hours H2O control 4	28	1234.79	1651.63
5 hours 10 nM SAG 3	75	711.071	677.078			5 hours H2O control 4	29	1348.2	836.592
5 hours 10 nM SAG 3	76	757.755	613.306			5 hours H2O control 4	30	1513.2	866.208
5 hours 10 nM SAG 3	77	778.074	751.698			5 hours H2O control 4	31	1288.15	1182.68
5 hours 10 nM SAG 3	78	873.027	766.949			5 hours H2O control 4	32	1472.18	2814.77
5 hours 10 nM SAG 3	79	731.857	734.464			5 hours H2O control 4	33	2012.63	1151.8
5 hours 10 nM SAG 3	80	902.45	727.561			5 hours H2O control 4	34	638.221	1103.96
5 hours 10 nM SAG 3	81	778.066	732.19			5 hours H2O control 4	35	713.556	742.998
5 hours 10 nM SAG 3	82	818.132	731.921			5 hours H2O control 4	36	1246.76	891.652
5 hours 10 nM SAG 3	83	985.811	767.176			5 hours H2O control 4	37	1351.44	970.23
5 hours 10 nM SAG 3	84	756.88	740.964			5 hours H2O control 4	38	1591.78	876.308
5 hours 10 nM SAG 3	85	871.425	763.281			5 hours H2O control 4	39	1804.63	993.816
5 hours 10 nM SAG 3	86	809.233	762.733			5 hours H2O control 4	40	1846.66	839.016
5 hours 10 nM SAG 3	87	879.196	758.289			5 hours H2O control 4	41	1579.19	1020.27
5 hours 10 nM SAG 3	88	873.687	708.532			5 hours H2O control 4	42	1294.99	952.73
5 hours 10 nM SAG 3	89	758.862	683.566			5 hours H2O control 4	43	1605.56	997.055
5 hours 10 nM SAG 3	90	755.374	745.492			5 hours H2O control 4	44	1669.96	903.998
5 hours 10 nM SAG 3	91	778.724	759.322			5 hours H2O control 4	45	1654.81	920.295
5 hours 10 nM SAG 3	92	958.498	778.942			5 hours H2O control 4	46	1588.92	1226.61
5 hours 10 nM SAG 3	93	868.137	783.843			5 hours H2O control 4	47	1940.58	1015.98
5 hours 10 nM SAG 3	94	811.404	717.087			5 hours H2O control 4	48	1388.13	914.941
5 hours 10 nM SAG 3	95	692.375	706.351			5 hours H2O control 4	49	1547.78	887.621
5 hours 10 nM SAG 3	96	825.589	775.727			5 hours H2O control 4	50	1374.55	889.504
5 hours 10 nM SAG 3	97	866.151	788.544			5 hours H2O control 4	51	1412.89	913.418
5 hours 10 nM SAG 3	98	799.578	705.415			5 hours H2O control 4	52	1017.5	833.018
5 hours 10 nM SAG 3	99	706.794	676.653			5 hours H2O control 4	53	1048.5	832.255
5 hours 10 nM SAG 3	100	706.225	636.963			5 hours H2O control 4	54	1087.68	848.518
5 hours 10 nM SAG 3	101	655.669	624.474			5 hours H2O control 4	55	1080.25	837.288
5 hours 10 nM SAG 3	102	785.797	701.81			5 hours H2O control 4	56	1108.27	894.09
5 hours 10 nM SAG 3	103	807.726	687.823			5 hours H2O control 4	57	1483.94	1134.68
5 hours 10 nM SAG 3	104	787.197	724.243			5 hours H2O control 4	58	1035.03	914.661
5 hours 10 nM SAG 3	105	790.299	725.614			5 hours H2O control 4	59	1099.54	837.855
5 hours 10 nM SAG 3	106	764.721	693.784			5 hours H2O control 4	60	1323.14	921.113
5 hours 10 nM SAG 3	107	756.139	668.197			5 hours H2O control 4	61	1530.95	976.257
5 hours 10 nM SAG 3	108	741.289	649.071			5 hours H2O control 4	62	1493.45	1069.46
5 hours 10 nM SAG 3	109	1162.69	1450.04			5 hours H2O control 4	63	1670.26	1357.3
5 hours 10 nM SAG 3	110	884.091	695.565			5 hours H2O control 4	64	1480.4	980.383
5 hours 10 nM SAG 3	111	801.825	665.655			5 hours H2O control 4	65	1277.86	1108.05
5 hours 10 nM SAG 3	112	881.734	754.85			5 hours H2O control 4	66	1137	836.539
5 hours 10 nM SAG 3	113	836.924	762.295			5 hours H2O control 4	67	1571.78	882.521
5 hours 10 nM SAG 3	114	1308.84	762.991			5 hours H2O control 4	68	1854.13	1244.85
5 hours 10 nM SAG 3	115	1178.25	747.346			5 hours H2O control 4	69	1648.5	2049.32
5 hours 10 nM SAG 3	116	1658.83	905.373			5 hours H2O control 4	70	1265.29	855.72
5 hours 10 nM SAG 3	117	942.077	1206.88			5 hours H2O control 4	71	1221.06	792.075
5 hours 10 nM SAG 3	118	1005.44	1205.65			5 hours H2O control 4	72	1253.19	795.81
5 hours 10 nM SAG 3	119	930.749	742.586			5 hours H2O control 4	73	1093.93	1889.17
5 hours 10 nM SAG 3	120	1247.19	863.954			5 hours H2O control 4	74	1053.62	912.802
5 hours 10 nM SAG 4	0	1010.79	827.431			5 hours H2O control 4	75	1004.35	1233.03
5 hours 10 nM SAG 4	1	742.349	1464.83			5 hours H2O control 4	76	1144.78	973.537
5 hours 10 nM SAG 4	2	723.009	795.374			5 hours H2O control 4	77	1227.71	917.322
5 hours 10 nM SAG 4	3	708.341	636.764			5 hours H2O control 4	78	1511.84	1022.87
5 hours 10 nM SAG 4	4	820.707	1803.04			5 hours H2O control 4	79	1351.66	1302.06
5 hours 10 nM SAG 4	5	904.066	720.972			5 hours H2O control 4	80	1472.83	1120.26
5 hours 10 nM SAG 4	6	958.401	709.988			5 hours H2O control 4	81	1423.73	868.497
5 hours 10 nM SAG 4	7	693.336	676.96			5 hours H2O control 4	82	1090.58	849.824
5 hours 10 nM SAG 4	8	975.518	813.662			5 hours H2O control 4	83	1603.7	911.831
5 hours 10 nM SAG 4	9	981.24	718.267			5 hours H2O control 4	84	1310.29	969.24
5 hours 10 nM SAG 4	10	1130.59	1069.23			5 hours H2O control 4	85	1691.53	961.938
5 hours 10 nM SAG 4	11	930.67	1864.75			5 hours H2O control 4	86	1005.72	784.206
5 hours 10 nM SAG 4	12	828.194	3526.59			5 hours H2O control 4	87	1734.87	1411.81
5 hours 10 nM SAG 4	13	1001.46	3676.5			5 hours H2O control 4	88	1682.08	1375.74
5 hours 10 nM SAG 4	14	1225.76	772.619			5 hours H2O control 4	89	1630.67	2578.13
5 hours 10 nM SAG 4	15	966.687	792.717			5 hours H2O control 4	90	1571.6	852.912
5 hours 10 nM SAG 4	16	956.485	708.572			5 hours H2O control 4	91	1651.7	975.002
5 hours 10 nM SAG 4	17	974.169	1026.18			5 hours H2O control 4	92	1385.52	924.827
5 hours 10 nM SAG 4	18	1012.51	694.109			5 hours H2O control 4	93	1598.78	996.764
5 hours 10 nM SAG 4	19	1038.02	724.824			5 hours H2O control 4	94	1459.52	891.382
5 hours 10 nM SAG 4	20	998.299	721.57			5 hours H2O control 4	95	1356.43	871.135
5 hours 10 nM SAG 4	21	710.003	689.825			5 hours H2O control 4	96	1390.79	862.836
5 hours 10 nM SAG 4	22	919.09	1131.83			5 hours H2O control 4	97	1787.2	1173.15
5 hours 10 nM SAG 4	23	958.508	704.19			5 hours H2O control 4	98	1258.25	888.031
5 hours 10 nM SAG 4	24	958.243	4364.89			5 hours H2O control 4	99	2006.83	1501.39
5 hours 10 nM SAG 4	25	964.459	780.789			5 hours H2O control 4	100	1503.91	897.862
5 hours 10 nM SAG 4	26	1084.71	784.282			5 hours H2O control 4	101	1094.44	780.552
5 hours 10 nM SAG 4	27	1155.69	1346.55			5 hours H2O control 4	102	1160.86	822.033
5 hours 10 nM SAG 4	28	976.581	2187.63			5 hours H2O control 4	103	1459.64	1432.87
5 hours 10 nM SAG 4	29	1054.13	2778.9			5 hours H2O control 4	104	1192.65	800.176
5 hours 10 nM SAG 4	30	882.022	767.254			5 hours H2O control 4	105	676.496	611.823
5 hours 10 nM SAG 4	31	825.305	739.255			5 hours H2O control 4	106	827.244	788.056
5 hours 10 nM SAG 4	32	753.097	681.483			5 hours H2O control 4	107	1568.61	825.105
5 hours 10 nM SAG 4	33	771.227	882.059			5 hours H2O control 4	108	1595.53	924.031
5 hours 10 nM SAG 4	34	821.097	670.7			5 hours H2O control 4	109	1209.31	769.745
5 hours 10 nM SAG 4	35	1080.8	817.963			5 hours H2O control 4	110	1348	786.85
5 hours 10 nM SAG 4	36	777.745	700.471			5 hours H2O control 4	111	1368.67	800.642
5 hours 10 nM SAG 4	37	1089.07	1242.68			5 hours H2O control 4	112	1386.66	745.758
5 hours 10 nM SAG 4	38	832.057	747.134			5 hours H2O control 4	113	1261.97	728.533
5 hours 10 nM SAG 4	39	874.834	1043.44			5 hours H2O control 4	114	1316.61	1072.99
5 hours 10 nM SAG 4	40	761.672	691.766			5 hours H2O control 4	115	1215.88	806.87
5 hours 10 nM SAG 4	41	863.773	721.441			5 hours H2O control 4	116	991.748	704.345
5 hours 10 nM SAG 4	42	1038.21	1399.53			5 hours H2O control 4	117	752.128	811.456
5 hours 10 nM SAG 4	43	731.175	699.291			5 hours H2O control 4	118	756.65	717.526
5 hours 10 nM SAG 4	44	699.547	898.273			5 hours H2O control 4	119	740.77	669.118
5 hours 10 nM SAG 4	45	834.839	793.542			5 hours H2O control 4	120	713.865	1125.55
5 hours 10 nM SAG 4	46	673.007	676.381			5 hours H2O control 4	121	724.573	685.967
5 hours 10 nM SAG 4	47	683.342	753.421			5 hours H2O control 4	122	717.195	693.796
5 hours 10 nM SAG 4	48	831.775	764.834			5 hours H2O control 4	123	1062.98	692.277
5 hours 10 nM SAG 4	49	785.2	798.734			5 hours H2O control 4	124	1817.13	869.567
5 hours 10 nM SAG 4	50	753.417	795.965			5 hours H2O control 4	125	1354.65	881.245
5 hours 10 nM SAG 4	51	699.238	753.83			5 hours H2O control 4	126	1245.9	1135.03
5 hours 10 nM SAG 4	52	1089.63	2363.24			5 hours H2O control 4	127	1630.86	892.516
5 hours 10 nM SAG 4	53	1304.34	825.941			5 hours H2O control 4	128	1323.47	857.287
5 hours 10 nM SAG 4	54	982.138	984.728			5 hours H2O control 4	129	1232.98	806.766
5 hours 10 nM SAG 4	55	1239.12	785.162			5 hours H2O control 4	130	1197.69	819.71
5 hours 10 nM SAG 4	56	788.087	935.769			5 hours H2O control 4	131	1622.79	1436.01
5 hours 10 nM SAG 4	57	758.772	776.799			5 hours H2O control 4	132	1199.83	794.799
5 hours 10 nM SAG 4	58	781.19	779.038			5 hours H2O control 4	133	1417.55	961.893
5 hours 10 nM SAG 4	59	854.11	709.515			5 hours H2O control 4	134	1348.77	893.798
5 hours 10 nM SAG 4	60	736.617	710.972			5 hours H2O control 4	135	1244.89	1173.44
5 hours 10 nM SAG 4	61	1112.79	776.701			5 hours H2O control 4	136	1283.04	838.845
5 hours 10 nM SAG 4	62	1095.65	1699			5 hours H2O control 4	137	1196.2	854.256
5 hours 10 nM SAG 4	63	886.639	783.714			5 hours H2O control 4	138	1409.29	860.122
5 hours 10 nM SAG 4	64	1119.38	774.222			5 hours H2O control 4	139	2053.96	1669.71
5 hours 10 nM SAG 4	65	798.371	812.883			5 hours H2O control 4	140	1312.93	834.733
5 hours 10 nM SAG 4	66	976.733	761.878			5 hours H2O control 4	141	1977.26	1547.59
5 hours 10 nM SAG 4	67	1056.92	851.893			5 hours H2O control 4	142	872.316	787.604
5 hours 10 nM SAG 4	68	1089.93	883.836			5 hours H2O control 4	143	1075.36	1413.79
5 hours 10 nM SAG 4	69	1082.79	979.915			5 hours H2O control 4	144	1230.02	794.843
5 hours 10 nM SAG 4	70	1002.81	843.96			5 hours H2O control 4	145	1547.05	899.362
5 hours 10 nM SAG 4	71	1203.41	867.338			5 hours H2O control 4	146	1543.99	864.138
5 hours 10 nM SAG 4	72	893.181	987.89			5 hours H2O control 4	147	1627.24	862.853
5 hours 10 nM SAG 4	73	1121.47	855.201			5 hours H2O control 4	148	1712.81	1827.95
5 hours 10 nM SAG 4	74	1094.54	851.737			5 hours H2O control 4	149	1285.22	894.207
5 hours 10 nM SAG 4	75	848.656	813.394			5 hours H2O control 4	150	1320.57	865.266
5 hours 10 nM SAG 4	76	835.719	789.141			5 hours H2O control 4	151	1138.63	805.317
5 hours 10 nM SAG 4	77	986.809	1077.39			5 hours H2O control 4	152	1801.35	1406.72
5 hours 10 nM SAG 4	78	829.742	915.214			5 hours H2O control 4	153	1221.2	807.697
5 hours 10 nM SAG 4	79	1450.66	1980.44			5 hours H2O control 4	154	1395.88	842.742
5 hours 10 nM SAG 4	80	1030.03	805.244			5 hours H2O control 4	155	1078.09	828.296
5 hours 10 nM SAG 4	81	833.735	1354.45			5 hours H2O control 4	156	1226.87	806.24
5 hours 10 nM SAG 4	82	707.771	704.43			5 hours H2O control 4	157	1679.27	1713.99
5 hours 10 nM SAG 4	83	692.533	736.142			5 hours H2O control 4	158	1467.21	890.415
5 hours 10 nM SAG 4	84	958.838	783.205			5 hours H2O control 4	159	1752.3	1654.47
5 hours 10 nM SAG 4	85	770.481	748.773			5 hours H2O control 4	160	1151.15	1031.58
5 hours 10 nM SAG 4	86	875.419	747.941			5 hours H2O control 4	161	1586.65	1156.65
5 hours 10 nM SAG 4	87	845.436	774.8			5 hours H2O control 4	162	1642.64	1207.58
5 hours 10 nM SAG 4	88	928.237	778.861			5 hours H2O control 4	163	1664	3611.48
5 hours 10 nM SAG 4	89	1323.68	1134.85			5 hours H2O control 4	164	692.533	614.101
5 hours 10 nM SAG 4	90	885.318	893.875			5 hours H2O control 4	165	821.464	713.225
5 hours 10 nM SAG 4	91	950.279	793.102			5 hours H2O control 4	166	1195.3	1266.64
5 hours 10 nM SAG 4	92	834.465	842.93			5 hours H2O control 4	167	922.741	632.931
5 hours 10 nM SAG 4	93	812.309	849.005			5 hours H2O control 4	168	691.989	625.766
5 hours 10 nM SAG 4	94	849.081	906.149			5 hours H2O control 4	169	748.552	673.02
5 hours 10 nM SAG 4	95	855.605	985.741			5 hours H2O control 4	170	719.145	688.011
5 hours 10 nM SAG 4	96	1520.93	995.726			5 hours H2O control 4	171	690.657	583.71
5 hours 10 nM SAG 4	97	947.672	784.76			5 hours H2O control 4	172	826.788	705.036
5 hours 10 nM SAG 4	98	1458.98	2780.15			5 hours H2O control 4	173	927.38	1410.43
5 hours 10 nM SAG 4	99	825.494	773.331			5 hours H2O control 4	174	793.672	683.022
5 hours 10 nM SAG 4	100	941.898	815.925			5 hours H2O control 4	175	852.292	701.379
5 hours 10 nM SAG 4	101	855.131	783.303			5 hours H2O control 4	176	743.6	676.987
5 hours 10 nM SAG 4	102	923.908	811.165			5 hours H2O control 4	177	769.965	726.292
5 hours 10 nM SAG 4	103	792.694	861.33			5 hours H2O control 4	178	1200.38	816.804
5 hours 10 nM SAG 4	104	891.216	811.742			5 hours H2O control 4	179	864.698	731.972
5 hours 10 nM SAG 5	0	813.486	781.18			5 hours H2O control 4	180	1122.83	794.369
5 hours 10 nM SAG 5	1	992.318	820.599			5 hours H2O control 4	181	1188.41	985.649
5 hours 10 nM SAG 5	2	1433.24	1383.76			5 hours H2O control 4	182	831.468	715.272
5 hours 10 nM SAG 5	3	905.36	796.598			5 hours H2O control 4	183	778.187	680.9
5 hours 10 nM SAG 5	4	1268.54	763.872			5 hours H2O control 4	184	1261.06	787.127
5 hours 10 nM SAG 5	5	849.521	753.307			5 hours H2O control 4	185	1482.63	1171.51
5 hours 10 nM SAG 5	6	1248.05	866.317			5 hours H2O control 4	186	1339.19	1173.48
5 hours 10 nM SAG 5	7	898.21	935.644			5 hours H2O control 4	187	1109.88	805.267
5 hours 10 nM SAG 5	8	763.633	731.535			5 hours H2O control 4	188	976.149	787.413
5 hours 10 nM SAG 5	9	921.764	798.706			5 hours H2O control 4	189	1294.04	852.016
5 hours 10 nM SAG 5	10	1453.74	882.672			5 hours H2O control 4	190	849.794	688.596
5 hours 10 nM SAG 5	11	937.427	829.32			5 hours H2O control 4	191	946.211	674.242
5 hours 10 nM SAG 5	12	780.085	632.921			5 hours H2O control 4	192	1299.19	805.976
5 hours 10 nM SAG 5	13	860.559	632.493			5 hours H2O control 4	193	778.85	653.026
5 hours 10 nM SAG 5	14	843.946	642.95			5 hours H2O control 4	194	863.559	731.039
5 hours 10 nM SAG 5	15	882.387	664.458			5 hours H2O control 4	195	763.752	699.701
5 hours 10 nM SAG 5	16	945.6	716.923			5 hours H2O control 4	196	1229.03	1133.69
5 hours 10 nM SAG 5	17	976.434	800.678			5 hours H2O control 4	197	1386.12	971.626
5 hours 10 nM SAG 5	18	805.298	1161.95			5 hours H2O control 4	198	944.084	737.376
5 hours 10 nM SAG 5	19	974.833	896.69			5 hours H2O control 4	199	1602.62	789.993
5 hours 10 nM SAG 5	20	779.235	716.476			5 hours H2O control 4	200	888.903	635.631
5 hours 10 nM SAG 5	21	832.894	723.243			5 hours H2O control 4	201	879.807	708.646
5 hours 10 nM SAG 5	22	818.48	732			5 hours H2O control 4	202	906.414	752.143
5 hours 10 nM SAG 5	23	821.006	1679.78			5 hours H2O control 4	203	1864.81	1127.38
5 hours 10 nM SAG 5	24	1336.92	941.539			5 hours H2O control 4	204	1198.8	796.104
5 hours 10 nM SAG 5	25	1246.91	889.603			5 hours H2O control 4	205	1074.96	798.691
5 hours 10 nM SAG 5	26	1308.75	824.391			5 hours H2O control 4	206	1000.55	797.637
5 hours 10 nM SAG 5	27	1163.62	783.879			5 hours H2O control 4	207	898.777	825.853
5 hours 10 nM SAG 5	28	669.33	619.74			5 hours H2O control 4	208	1001.1	738.183
5 hours 10 nM SAG 5	29	817.406	694.9			5 hours H2O control 4	209	869.832	734.93
5 hours 10 nM SAG 5	30	807.704	613.784			5 hours H2O control 4	210	1349.27	1356.14
5 hours 10 nM SAG 5	31	801.189	696.54			5 hours H2O control 4	211	1343.99	4050.28
5 hours 10 nM SAG 5	32	785.791	647.515			5 hours H2O control 4	212	911.937	766.3
5 hours 10 nM SAG 5	33	739.45	609.097			5 hours H2O control 4	213	983.076	719.211
5 hours 10 nM SAG 5	34	839.676	701.207			5 hours H2O control 4	214	898.946	688.284
5 hours 10 nM SAG 5	35	884.084	1342.38			5 hours H2O control 4	215	1131.68	748.801
5 hours 10 nM SAG 5	36	799.432	665.549			5 hours H2O control 4	216	1739.58	1189.61
5 hours 10 nM SAG 5	37	725.006	906.53			5 hours H2O control 4	217	1408.77	791.191
5 hours 10 nM SAG 5	38	773.564	714.973			5 hours H2O control 4	218	980.784	666.152
5 hours 10 nM SAG 5	39	659.247	637.668			5 hours H2O control 4	219	837.016	691.054
5 hours 10 nM SAG 5	40	845.669	809.396			5 hours H2O control 4	220	1143.52	744.668
5 hours 10 nM SAG 5	41	831.807	708.616			5 hours H2O control 4	221	848.059	705.96
5 hours 10 nM SAG 5	42	892.586	772.755			5 hours H2O control 4	222	1579.34	799
5 hours 10 nM SAG 5	43	866.694	721.925			5 hours H2O control 4	223	1002.35	800.623
5 hours 10 nM SAG 5	44	898.843	738.546			5 hours H2O control 4	224	915.282	696.725
5 hours 10 nM SAG 5	45	869.615	689.931			5 hours H2O control 4	225	1047.45	725.054
5 hours 10 nM SAG 5	46	857.61	916.137			5 hours H2O control 4	226	1065.7	742.286
5 hours 10 nM SAG 5	47	872.872	682.832			5 hours H2O control 4	227	1183.94	788.454
5 hours 10 nM SAG 5	48	869.266	687.337			5 hours H2O control 4	228	1049.33	691.162
5 hours 10 nM SAG 5	49	886.321	830.463			5 hours H2O control 4	229	1168.47	730.752
5 hours 10 nM SAG 5	50	862.418	710.257			5 hours H2O control 5	0	1346.06	823.02
5 hours 10 nM SAG 5	51	1001.14	1051.01			5 hours H2O control 5	1	959.148	782.801
5 hours 10 nM SAG 5	52	895.115	698.958			5 hours H2O control 5	2	1090.68	774.604
5 hours 10 nM SAG 5	53	942.922	693.346			5 hours H2O control 5	3	1129.09	771.914
5 hours 10 nM SAG 5	54	1118.11	804.623			5 hours H2O control 5	4	1160.12	770.233
5 hours 10 nM SAG 5	55	916.739	822.074			5 hours H2O control 5	5	1068.18	793.83
5 hours 10 nM SAG 5	56	1612.64	1212.51			5 hours H2O control 5	6	1145.14	802.467
5 hours 10 nM SAG 5	57	958.683	916.498			5 hours H2O control 5	7	956.101	771.829
5 hours 10 nM SAG 5	58	987.758	828.925			5 hours H2O control 5	8	1433.1	821.559
5 hours 10 nM SAG 5	59	918.725	798.126			5 hours H2O control 5	9	1018.86	787.86
5 hours 10 nM SAG 5	60	1239.41	949.607			5 hours H2O control 5	10	881.33	800.035
5 hours 10 nM SAG 5	61	1186.63	904.57			5 hours H2O control 5	11	1085.34	786.644
5 hours 10 nM SAG 5	62	1136.17	898.59			5 hours H2O control 5	12	1081.2	1286.56
5 hours 10 nM SAG 5	63	1105.23	1004.28			5 hours H2O control 5	13	1137.92	824.196
5 hours 10 nM SAG 5	64	1087.58	833.988			5 hours H2O control 5	14	972.284	1128.24
5 hours 10 nM SAG 5	65	1442.51	953.272			5 hours H2O control 5	15	1796.6	1029.74
5 hours 10 nM SAG 5	66	1473.8	1087.33			5 hours H2O control 5	16	1621.28	819.072
5 hours 10 nM SAG 5	67	1111.44	1012.58			5 hours H2O control 5	17	1306.58	819.479
5 hours 10 nM SAG 5	68	1440.59	997.256			5 hours H2O control 5	18	1583.18	899.597
5 hours 10 nM SAG 5	69	957.455	780.472			5 hours H2O control 5	19	2422.91	1543.12
5 hours 10 nM SAG 5	70	1193.7	802.805			5 hours H2O control 5	20	1410.55	800.363
5 hours 10 nM SAG 5	71	1100.04	904.45			5 hours H2O control 5	21	748.07	627.301
5 hours 10 nM SAG 5	72	1062.64	824.037			5 hours H2O control 5	22	758.849	700.904
5 hours 10 nM SAG 5	73	1761.53	1574.76			5 hours H2O control 5	23	918.443	866.472
5 hours 10 nM SAG 5	74	1249.01	1076.09			5 hours H2O control 5	24	1015.58	811.961
5 hours 10 nM SAG 5	75	1268.23	1002.97			5 hours H2O control 5	25	1097.68	804.011
5 hours 10 nM SAG 5	76	1380.89	1126.63			5 hours H2O control 5	26	1049.38	745.276
5 hours 10 nM SAG 5	77	1656.4	1125.11			5 hours H2O control 5	27	1006.75	754.584
5 hours 10 nM SAG 5	78	1284.66	982.42			5 hours H2O control 5	28	975.004	736.633
5 hours 10 nM SAG 5	79	1620.24	1086.69			5 hours H2O control 5	29	854.651	685.193
5 hours 10 nM SAG 5	80	1247.42	881.553			5 hours H2O control 5	30	994.989	810.989
5 hours 10 nM SAG 5	81	861.614	639.061			5 hours H2O control 5	31	846.105	716.511
5 hours 10 nM SAG 5	82	1083.91	1239.92			5 hours H2O control 5	32	1620.66	854.347
5 hours 10 nM SAG 5	83	974.961	787.633			5 hours H2O control 5	33	1256.54	799.106
5 hours 10 nM SAG 5	84	886.536	692.769			5 hours H2O control 5	34	2009.8	898.951
5 hours 10 nM SAG 5	85	951.867	670.791			5 hours H2O control 5	35	1662.14	1075.52
5 hours 10 nM SAG 5	86	903.04	752.25			5 hours H2O control 5	36	1324.08	886.143
5 hours 10 nM SAG 5	87	936.752	672.957			5 hours H2O control 5	37	1023.86	832.268
5 hours 10 nM SAG 5	88	869.483	659.648			5 hours H2O control 5	38	1041.51	810.223
5 hours 10 nM SAG 5	89	1231.27	932.48			5 hours H2O control 5	39	1177.32	914.783
5 hours 10 nM SAG 5	90	1034.43	698.157			5 hours H2O control 5	40	1623.07	1091.49
5 hours 10 nM SAG 5	91	939.768	704.568			5 hours H2O control 5	41	1306.52	792.756
5 hours 10 nM SAG 5	92	834.375	640.531			5 hours H2O control 5	42	1130.28	810.084
5 hours 10 nM SAG 5	93	1034.74	889.087			5 hours H2O control 5	43	1214.69	808.733
5 hours 10 nM SAG 5	94	841.935	658.217			5 hours H2O control 5	44	1040.73	772.697
5 hours 10 nM SAG 5	95	931.231	1197.86			5 hours H2O control 5	45	1201.07	785.011
5 hours 10 nM SAG 5	96	883.631	782.933			5 hours H2O control 5	46	1243.31	801.319
5 hours 10 nM SAG 5	97	1033.07	766.102			5 hours H2O control 5	47	1557.13	859.52
5 hours 10 nM SAG 5	98	1129.75	1221.96			5 hours H2O control 5	48	1325.28	836.309
5 hours 10 nM SAG 5	99	1173.47	841.06			5 hours H2O control 5	49	1108.72	781.253
5 hours 10 nM SAG 5	100	1161.2	818.755			5 hours H2O control 5	50	1093.92	764.365
5 hours 10 nM SAG 5	101	1113.71	831.673			5 hours H2O control 5	51	4772.6	6405.03
5 hours 10 nM SAG 5	102	1109.3	794.606			5 hours H2O control 5	52	1659.04	832.278
5 hours 10 nM SAG 5	103	1238.22	866.004			5 hours H2O control 5	53	1647.14	828.362
5 hours 10 nM SAG 5	104	1330.78	884.95			5 hours H2O control 5	54	1392.19	810.122
5 hours 10 nM SAG 5	105	1142.94	830.908			5 hours H2O control 5	55	1152.07	758.37
5 hours 10 nM SAG 5	106	1163.12	1033.36			5 hours H2O control 5	56	1263.86	793.628
5 hours 10 nM SAG 5	107	1151.39	810.745			5 hours H2O control 5	57	1368.34	813.187
5 hours 10 nM SAG 5	108	1353.64	906.546			5 hours H2O control 5	58	1002.8	786.913
5 hours 10 nM SAG 5	109	1274.84	1089.79			5 hours H2O control 5	59	1252.48	785.165
5 hours 10 nM SAG 5	110	1358.75	957.664			5 hours H2O control 5	60	1173.08	752.174
5 hours 10 nM SAG 5	111	1277.13	1106.94			5 hours H2O control 5	61	1296.08	801.998
5 hours 10 nM SAG 5	112	1030.61	762.077			5 hours H2O control 5	62	1052.26	795.975
5 hours 10 nM SAG 5	113	1317.52	895.685			5 hours H2O control 5	63	1231.17	786.449
5 hours 10 nM SAG 5	114	1312.08	1023.39			5 hours H2O control 5	64	1087.35	816.362
5 hours 10 nM SAG 5	115	898.547	727.214			5 hours H2O control 5	65	980.989	754.49
5 hours 10 nM SAG 5	116	988.39	696.561			5 hours H2O control 5	66	1560.51	839.503
5 hours 10 nM SAG 5	117	874.998	679.354			5 hours H2O control 5	67	1803.17	826.365
5 hours 10 nM SAG 5	118	1072.39	814.651			5 hours H2O control 5	68	1336.09	791.771
5 hours 10 nM SAG 5	119	894.969	757.815			5 hours H2O control 5	69	1109.69	794.667
5 hours 10 nM SAG 5	120	975.88	819.501			5 hours H2O control 5	70	1875.3	990.856
5 hours 10 nM SAG 5	121	1237.69	897.351			5 hours H2O control 5	71	1101.23	790.007
5 hours 10 nM SAG 5	122	984.976	765.192			5 hours H2O control 5	72	1187.59	774.851
5 hours 10 nM SAG 5	123	1180.69	929.134			5 hours H2O control 5	73	1282.91	884.615
5 hours 10 nM SAG 5	124	1056.47	775.908			5 hours H2O control 5	74	1419.96	815.122
5 hours 10 nM SAG 5	125	1424.77	879.796			5 hours H2O control 5	75	1034.4	795.503
5 hours 10 nM SAG 5	126	962.664	761.995			5 hours H2O control 5	76	1210.02	781.243
5 hours 10 nM SAG 5	127	1249.84	967.846			5 hours H2O control 5	77	1438.94	1166.32
5 hours 10 nM SAG 5	128	1340.26	845.709			5 hours H2O control 5	78	1691.74	828.522
5 hours 10 nM SAG 5	129	1157.42	796.058			5 hours H2O control 5	79	969.586	750.393
5 hours 10 nM SAG 5	130	1126.52	945.071			5 hours H2O control 5	80	1413.4	799.843
5 hours 10 nM SAG 5	131	1140.56	804.827			5 hours H2O control 5	81	978.857	683.783
5 hours 10 nM SAG 5	132	1072.51	766.104			5 hours H2O control 5	82	879.298	700.36
5 hours 10 nM SAG 5	133	1282.67	849.809			5 hours H2O control 5	83	1130.47	730.748
5 hours 10 nM SAG 5	134	1354.25	863.475			5 hours H2O control 5	84	892.955	741.078
5 hours 10 nM SAG 5	135	1463.29	1331			5 hours H2O control 5	85	1139.22	716.093
5 hours 10 nM SAG 5	136	1303.86	977.703			5 hours H2O control 5	86	1200.79	884.773
5 hours 10 nM SAG 5	137	1357.17	843.01			5 hours H2O control 5	87	1111.27	837.842
5 hours 10 nM SAG 5	138	1968.16	1709.38			5 hours H2O control 5	88	1237.85	765.196
5 hours 10 nM SAG 5	139	1478.67	1021.84			5 hours H2O control 5	89	1066.29	722.555
5 hours 10 nM SAG 5	140	1286.23	850.882			5 hours H2O control 5	90	1164.21	747.647
5 hours 10 nM SAG 5	141	1044.66	770.43			5 hours H2O control 5	91	1004.5	737.182
5 hours 10 nM SAG 5	142	1709.72	969.684			5 hours H2O control 5	92	892.056	689.288
5 hours 10 nM SAG 5	143	1462.45	901.822			5 hours H2O control 5	93	1438.21	862.677
5 hours 10 nM SAG 5	144	1440.76	843.671			5 hours H2O control 5	94	1025.74	707.685
5 hours 10 nM SAG 5	145	1074.75	780.307			5 hours H2O control 5	95	1003.29	806.162
5 hours 10 nM SAG 5	146	1601.86	966.894			5 hours H2O control 5	96	1762.92	781.638
5 hours 10 nM SAG 5	147	1279.87	893.742			5 hours H2O control 5	97	1035.27	734.752
5 hours 10 nM SAG 5	148	1491.48	1009.93			5 hours H2O control 5	98	892.738	785.426
5 hours 10 nM SAG 5	149	1625.26	1158.82			5 hours H2O control 5	99	966.868	752.786
5 hours 10 nM SAG 5	150	1287.71	936.262			5 hours H2O control 5	100	1261.62	769.137
5 hours 10 nM SAG 5	151	1434.94	855.946			5 hours H2O control 5	101	800.75	630.987
5 hours 10 nM SAG 5	152	1624.79	1107.66			5 hours H2O control 5	102	804.844	635.912
5 hours 10 nM SAG 5	153	1750.09	1070.54			5 hours H2O control 5	103	1204.86	686.844
5 hours 10 nM SAG 5	154	1590.89	1149.92			5 hours H2O control 5	104	950.837	764.64
5 hours 10 nM SAG 5	155	1848.39	1246.37			5 hours H2O control 5	105	887.571	728.122
5 hours 10 nM SAG 5	156	1492.56	856.765			5 hours H2O control 5	106	1064.15	1189.39
5 hours 10 nM SAG 5	157	1746.33	910.975			5 hours H2O control 5	107	756.235	621.213
5 hours 10 nM SAG 5	158	1840.17	1086.18			5 hours H2O control 5	108	785.745	658.086
5 hours 10 nM SAG 5	159	1006.36	833.761			5 hours H2O control 5	109	756.141	631.647
5 hours 10 nM SAG 5	160	1349.92	962.102			5 hours H2O control 5	110	875.335	661.71
5 hours 10 nM SAG 5	161	1230.87	952.883			5 hours H2O control 5	111	908.707	678.929
5 hours 10 nM SAG 5	162	1292.96	1107.7			5 hours H2O control 5	112	832.853	677.204
5 hours 10 nM SAG 5	163	1290.79	809.31			5 hours H2O control 5	113	1240.15	742.959
5 hours 10 nM SAG 5	164	1194.66	887.234			5 hours H2O control 5	114	1080.15	740.769
5 hours 10 nM SAG 5	165	1322.66	1019.01			5 hours H2O control 5	115	911.481	740.31
5 hours 10 nM SAG 5	166	1387.16	1075.37			5 hours H2O control 5	116	1191.17	812.209
5 hours 10 nM SAG 5	167	1227.14	928.575			5 hours H2O control 5	117	1381.55	776.268
5 hours 10 nM SAG 5	168	1360.98	953.859			5 hours H2O control 5	118	1227.85	748.698
5 hours 10 nM SAG 5	169	1630.5	1146.66			5 hours H2O control 5	119	1455.75	1553.52
5 hours 10 nM SAG 5	170	1643.91	1067.04			5 hours H2O control 5	120	1618.04	830.594
5 hours 10 nM SAG 6	0	1410.26	913.322			5 hours H2O control 5	121	1078.93	806.661
5 hours 10 nM SAG 6	1	950.741	821.112			5 hours H2O control 5	122	1390.39	808.225
5 hours 10 nM SAG 6	2	1129.69	863.575			5 hours H2O control 5	123	1292.58	789.752
5 hours 10 nM SAG 6	3	1128.66	882.42			5 hours H2O control 5	124	1354.6	785.672
5 hours 10 nM SAG 6	4	1218.77	915.853			5 hours H2O control 5	125	1020.48	736.378
5 hours 10 nM SAG 6	5	1396.91	863.974			5 hours H2O control 5	126	1134.7	1123.55
5 hours 10 nM SAG 6	6	1024	852.259			5 hours H2O control 5	127	1125.15	723.481
5 hours 10 nM SAG 6	7	1446.16	855.416			5 hours H2O control 5	128	1042.68	731.074
5 hours 10 nM SAG 6	8	1183.61	883.606			5 hours H2O control 5	129	1066.47	810.782
5 hours 10 nM SAG 6	9	1455.67	1383.89			5 hours H2O control 5	130	1092.47	775.49
5 hours 10 nM SAG 6	10	764.974	623.461			5 hours H2O control 5	131	1049.52	850.811
5 hours 10 nM SAG 6	11	866.904	666.655			5 hours H2O control 5	132	1083.26	708.525
5 hours 10 nM SAG 6	12	788.504	671.367			5 hours H2O control 5	133	972.409	686.801
5 hours 10 nM SAG 6	13	1629.95	1016			5 hours H2O control 5	134	965.142	694.194
5 hours 10 nM SAG 6	14	1576.74	891.833			5 hours H2O control 5	135	1058.64	818.274
5 hours 10 nM SAG 6	15	1332.11	861.227			5 hours H2O control 5	136	944.385	701.675
5 hours 10 nM SAG 6	16	1145.44	852.258			5 hours H2O control 5	137	965.275	814.074
5 hours 10 nM SAG 6	17	1296.04	823.875			5 hours H2O control 5	138	867.736	697.927
5 hours 10 nM SAG 6	18	1000.56	738.849			5 hours H2O control 5	139	922.723	692.729
5 hours 10 nM SAG 6	19	1348.67	848.294			5 hours H2O control 5	140	866.086	677.949
5 hours 10 nM SAG 6	20	1212.53	767.757			5 hours H2O control 5	141	1343.13	921.653
5 hours 10 nM SAG 6	21	1186.4	806.344			5 hours H2O control 5	142	1111.41	1136.49
5 hours 10 nM SAG 6	22	1277.92	852.453			5 hours H2O control 5	143	1457.87	780.933
5 hours 10 nM SAG 6	23	1376.94	881.866			5 hours H2O control 5	144	969.384	656.858
5 hours 10 nM SAG 6	24	2028.84	1021.58			5 hours H2O control 5	145	788.453	618.61
5 hours 10 nM SAG 6	25	1707.18	1043.37			5 hours H2O control 5	146	991.026	683.306
5 hours 10 nM SAG 6	26	1427.77	844.404			5 hours H2O control 5	147	810.195	647.105
5 hours 10 nM SAG 6	27	1575.89	1717.27			5 hours H2O control 5	148	849.996	657.97
5 hours 10 nM SAG 6	28	1168.02	813.874			5 hours H2O control 5	149	791.149	691.485
5 hours 10 nM SAG 6	29	1473.79	970.381			5 hours H2O control 5	150	870.537	662.079
5 hours 10 nM SAG 6	30	2027.7	1954.87			5 hours H2O control 5	151	827.008	661.956
5 hours 10 nM SAG 6	31	1375.44	884.601			5 hours H2O control 5	152	1302.2	783.011
5 hours 10 nM SAG 6	32	2386.8	1455.59			5 hours H2O control 5	153	962.576	766.203
5 hours 10 nM SAG 6	33	1938.11	984.391			5 hours H2O control 5	154	1053.68	791.291
5 hours 10 nM SAG 6	34	1973.99	1371.82			5 hours H2O control 5	155	1149.98	774.291
5 hours 10 nM SAG 6	35	1645.64	887.2			5 hours H2O control 5	156	1062.94	763.49
5 hours 10 nM SAG 6	36	1564.8	1354.87			5 hours H2O control 5	157	979.326	756.547
5 hours 10 nM SAG 6	37	1507.3	991.613			5 hours H2O control 5	158	1008.37	758.677
5 hours 10 nM SAG 6	38	1511.4	1498.52			5 hours H2O control 5	159	1023.55	746.075
5 hours 10 nM SAG 6	39	1262.22	860.306			5 hours H2O control 5	160	1018.09	774.128
5 hours 10 nM SAG 6	40	1057.24	862.544			5 hours H2O control 5	161	997.052	731.374
5 hours 10 nM SAG 6	41	1530.9	884.397			5 hours H2O control 5	162	1492.79	785.639
5 hours 10 nM SAG 6	42	1205.06	805.295			5 hours H2O control 5	163	1171.84	740.993
5 hours 10 nM SAG 6	43	1631.44	1272.18			5 hours H2O control 5	164	917.535	749.26
5 hours 10 nM SAG 6	44	1383.29	846.429			5 hours H2O control 5	165	1020.2	1126.97
5 hours 10 nM SAG 6	45	1080.69	1434.5			5 hours H2O control 5	166	956.661	737.673
5 hours 10 nM SAG 6	46	1198.8	1478.87			5 hours H2O control 5	167	1004.29	716.885
5 hours 10 nM SAG 6	47	1156.91	800.437			5 hours H2O control 5	168	1246.64	765.775
5 hours 10 nM SAG 6	48	1450.13	1169.35			5 hours H2O control 5	169	1035.4	763.939
5 hours 10 nM SAG 6	49	1067.64	822.329			5 hours H2O control 5	170	929.891	721.751
5 hours 10 nM SAG 6	50	1019.53	950			5 hours H2O control 5	171	1438.49	756.693
5 hours 10 nM SAG 6	51	1015.46	815.664			5 hours H2O control 5	172	1269.36	760.833
5 hours 10 nM SAG 6	52	1397.91	1164.99			5 hours H2O control 5	173	1123.55	1254.68
5 hours 10 nM SAG 6	53	1792.95	909.111			5 hours H2O control 5	174	1460.9	2011.38
5 hours 10 nM SAG 6	54	1212.95	800.709			5 hours H2O control 5	175	1132.62	717.654
5 hours 10 nM SAG 6	55	997.541	835.82			5 hours H2O control 5	176	1177.06	730.545
5 hours 10 nM SAG 6	56	913.226	791.204			5 hours H2O control 5	177	1091.5	702.816
5 hours 10 nM SAG 6	57	1579.17	1762.66			5 hours H2O control 5	178	906.581	716.101
5 hours 10 nM SAG 6	58	1378.17	898.655			5 hours H2O control 5	179	1184.28	742.53
5 hours 10 nM SAG 6	59	1182.05	847.271			5 hours H2O control 5	180	1181.63	705.56
5 hours 10 nM SAG 6	60	1146.19	841.04			5 hours H2O control 5	181	930.076	703.023
5 hours 10 nM SAG 6	61	810.529	704.818			5 hours H2O control 5	182	1679.67	858.518
5 hours 10 nM SAG 6	62	1108.87	701.822			5 hours H2O control 5	183	1375.4	739.136
5 hours 10 nM SAG 6	63	898.695	652.83			5 hours H2O control 5	184	1203.7	731.727
5 hours 10 nM SAG 6	64	1121.98	899.961			5 hours H2O control 5	185	966.105	732.081
5 hours 10 nM SAG 6	65	911.597	760.659			5 hours H2O control 5	186	1217.25	659
5 hours 10 nM SAG 6	66	858.283	664.925			5 hours H2O control 5	187	923.486	669.714
5 hours 10 nM SAG 6	67	1144.37	746.17			5 hours H2O control 5	188	841.865	673.513
5 hours 10 nM SAG 6	68	1113.68	721.271			5 hours H2O control 5	189	692.543	627.337
5 hours 10 nM SAG 6	69	1408.18	1074.84			5 hours H2O control 5	190	1424.06	793.938
5 hours 10 nM SAG 6	70	1288.93	814.842			5 hours H2O control 7	0	1491.73	772.097
5 hours 10 nM SAG 6	71	996.023	712.054			5 hours H2O control 7	1	902.082	771.596
5 hours 10 nM SAG 6	72	929.628	716.547			5 hours H2O control 7	2	990.228	833.753
5 hours 10 nM SAG 6	73	1408.74	729.427			5 hours H2O control 7	3	837.38	804.94
5 hours 10 nM SAG 6	74	903.099	685.323			5 hours H2O control 7	4	748.517	770.326
5 hours 10 nM SAG 6	75	969.61	730.359			5 hours H2O control 7	5	764.164	792.004
5 hours 10 nM SAG 6	76	1030.95	941.302			5 hours H2O control 7	6	762.924	786.219
5 hours 10 nM SAG 6	77	957.596	722.907			5 hours H2O control 7	7	794.381	810.274
5 hours 10 nM SAG 6	78	1345.06	814.2			5 hours H2O control 7	8	1046.52	833.567
5 hours 10 nM SAG 6	79	948.795	706.634			5 hours H2O control 7	9	806.437	808.97
5 hours 10 nM SAG 6	80	1940.33	1396.44			5 hours H2O control 7	10	1526.78	886.343
5 hours 10 nM SAG 6	81	1731.26	1290.94			5 hours H2O control 7	11	820.122	858.759
5 hours 10 nM SAG 6	82	1815.43	4388.5			5 hours H2O control 7	12	848.442	823.423
5 hours 10 nM SAG 6	83	1375.98	931.25			5 hours H2O control 7	13	963.792	844.543
5 hours 10 nM SAG 6	84	1692.21	874.044			5 hours H2O control 7	14	1410.31	1108.39
5 hours 10 nM SAG 6	85	2067.88	3294.35			5 hours H2O control 7	15	950.4	837.107
5 hours 10 nM SAG 6	86	2250.12	1039.2			5 hours H2O control 7	16	837.664	804.539
5 hours 10 nM SAG 6	87	1473.26	871.64			5 hours H2O control 7	17	1164.79	861.709
5 hours 10 nM SAG 6	88	1468.86	891.061			5 hours H2O control 7	18	1650.16	2315.01
5 hours 10 nM SAG 6	89	1517.69	1123.91			5 hours H2O control 7	19	1081.89	902.963
5 hours 10 nM SAG 6	90	2786.32	1369.92			5 hours H2O control 7	20	918.804	847.668
5 hours 10 nM SAG 6	91	2271.41	1559.58			5 hours H2O control 7	21	1110.47	863.028
5 hours 10 nM SAG 6	92	1221.86	819.867			5 hours H2O control 7	22	1479.75	898.715
5 hours 10 nM SAG 6	93	1582.89	916.513			5 hours H2O control 7	23	1270.06	1038.59
5 hours 10 nM SAG 6	94	1260.71	875.225			5 hours H2O control 7	24	1149.04	929.425
5 hours 10 nM SAG 6	95	1485.19	899.251			5 hours H2O control 7	25	1184.42	929.884
5 hours 10 nM SAG 6	96	1325.31	826.571			5 hours H2O control 7	26	1028.33	831.763
5 hours 10 nM SAG 6	97	1444.46	933.676			5 hours H2O control 7	27	1133.85	872.005
5 hours 10 nM SAG 6	98	1243.45	935.629			5 hours H2O control 7	28	1200.3	865.354
5 hours 10 nM SAG 6	99	1646.14	882.32			5 hours H2O control 7	29	1216.03	914.933
5 hours 10 nM SAG 6	100	1547.41	1291.8			5 hours H2O control 7	30	1098.52	853.216
5 hours 10 nM SAG 6	101	1526.82	3032.24			5 hours H2O control 7	31	948.861	829.707
5 hours 10 nM SAG 6	102	1351.92	1009.37			5 hours H2O control 7	32	1700.43	1021
5 hours 10 nM SAG 6	103	759.781	754.411			5 hours H2O control 7	33	1087.57	866.18
5 hours 10 nM SAG 6	104	817.156	718.61			5 hours H2O control 7	34	1211.54	963.945
5 hours 10 nM SAG 6	105	870.932	792.446			5 hours H2O control 7	35	1257.75	812.843
5 hours 10 nM SAG 6	106	850.696	902.013			5 hours H2O control 7	36	1070.05	888.601
5 hours 10 nM SAG 6	107	1319.4	1264.52			5 hours H2O control 7	37	1274.37	1229.63
5 hours 10 nM SAG 6	108	2331.48	1105.77			5 hours H2O control 7	38	1131.39	1169.85
5 hours 10 nM SAG 6	109	1329.59	849.333			5 hours H2O control 7	39	1188.16	847.754
5 hours 10 nM SAG 6	110	1137.81	806.17			5 hours H2O control 7	40	1144.76	870.459
5 hours 10 nM SAG 6	111	1400.7	856.991			5 hours H2O control 7	41	1101.81	840.194
5 hours 10 nM SAG 6	112	1933.86	1085.49			5 hours H2O control 7	42	1102.53	871.456
5 hours 10 nM SAG 6	113	949.076	754.634			5 hours H2O control 7	43	1317.74	838.621
5 hours 10 nM SAG 6	114	991.978	763.212			5 hours H2O control 7	44	1175.45	855.785
5 hours 10 nM SAG 6	115	1054.89	755.238			5 hours H2O control 7	45	1236.69	923.35
5 hours 10 nM SAG 6	116	1518.26	850.718			5 hours H2O control 7	46	949.053	846.781
5 hours 10 nM SAG 6	117	1078.43	803.317			5 hours H2O control 7	47	1111.01	1041.51
5 hours 10 nM SAG 6	118	1320.23	819.039			5 hours H2O control 7	48	923.214	862.12
5 hours 10 nM SAG 6	119	1322.68	807.049			5 hours H2O control 7	49	1095.81	855.133
5 hours 10 nM SAG 6	120	1547.26	1117.55			5 hours H2O control 7	50	1020.77	848.112
5 hours 10 nM SAG 6	121	1352.68	1064.7			5 hours H2O control 7	51	1124.16	1055.47
5 hours 10 nM SAG 6	122	1088.52	803.298			5 hours H2O control 7	52	1131.98	863.921
5 hours 10 nM SAG 6	123	1267.54	864.755			5 hours H2O control 7	53	1059.36	916.669
5 hours 10 nM SAG 6	124	1693.4	1191.41			5 hours H2O control 7	54	1406.15	1374.9
5 hours 10 nM SAG 6	125	1147.45	810			5 hours H2O control 7	55	1158.5	893.178
5 hours 10 nM SAG 6	126	1598.56	853.797			5 hours H2O control 7	56	1280.03	1332.23
5 hours 10 nM SAG 6	127	1214.7	832.534			5 hours H2O control 7	57	1173.31	840.987
5 hours 10 nM SAG 6	128	1538.14	922.27			5 hours H2O control 7	58	1105.35	827.431
5 hours 10 nM SAG 6	129	1349.8	849.409			5 hours H2O control 7	59	1707.56	903.035
5 hours 10 nM SAG 6	130	1303.83	912.091			5 hours H2O control 7	60	1086.86	877.653
5 hours 10 nM SAG 6	131	1253.85	803.289			5 hours H2O control 7	61	1103.19	1384.31
5 hours 10 nM SAG 6	132	1343.93	919.446			5 hours H2O control 7	62	813.852	792.159
5 hours 10 nM SAG 6	133	1330.74	828.458			5 hours H2O control 7	63	1077.81	1481.78
5 hours 10 nM SAG 6	134	1260.57	929.443			5 hours H2O control 7	64	1223.34	778.465
5 hours 10 nM SAG 6	135	1720.01	6455.82			5 hours H2O control 7	65	682.728	636.537
5 hours 10 nM SAG 6	136	1281.71	825.649			5 hours H2O control 7	66	713.589	653.159
5 hours 10 nM SAG 6	137	1237	907.648			5 hours H2O control 7	67	652.154	627.831
5 hours 10 nM SAG 6	138	1138.77	1012.16			5 hours H2O control 7	68	653.395	607.346
5 hours 10 nM SAG 6	139	1157.4	753.066			5 hours H2O control 7	69	796.004	650.173
5 hours 10 nM SAG 6	140	1059.25	1031.68			5 hours H2O control 7	70	662.147	660.511
5 hours 10 nM SAG 6	141	1402.38	1046.85			5 hours H2O control 7	71	728.172	652.73
5 hours 10 nM SAG 6	142	1028.71	720.496			5 hours H2O control 7	72	633.326	623.767
5 hours 10 nM SAG 6	143	826.377	647.641			5 hours H2O control 7	73	671.273	672.379
5 hours 10 nM SAG 6	144	880.451	656.19			5 hours H2O control 7	74	801.614	673.897
5 hours 10 nM SAG 6	145	985.886	710.468			5 hours H2O control 7	75	1109.86	714.82
5 hours 10 nM SAG 6	146	794.47	649.796			5 hours H2O control 7	76	1016.61	848.962
5 hours 10 nM SAG 6	147	1154.35	754.227			5 hours H2O control 7	77	1674.58	976.519
5 hours 10 nM SAG 6	148	1224.53	1301.85			5 hours H2O control 7	78	1035.21	991.609
5 hours 10 nM SAG 6	149	1580.27	946.385			5 hours H2O control 7	79	1088.07	816.052
5 hours 10 nM SAG 6	150	1406.84	805.825			5 hours H2O control 7	80	1139.44	785.346
5 hours 10 nM SAG 6	151	1302.2	752.357			5 hours H2O control 7	81	1425.88	1159.73
5 hours 10 nM SAG 6	152	1102.9	728.533			5 hours H2O control 7	82	1200.99	1031.92
5 hours 10 nM SAG 6	153	1181.94	729.453			5 hours H2O control 7	83	1141.37	929.481
5 hours 10 nM SAG 6	154	953.472	721.463			5 hours H2O control 7	84	1033.67	853.476
5 hours 10 nM SAG 6	155	1508.03	766.791			5 hours H2O control 7	85	880.461	1114.81
5 hours 10 nM SAG 6	156	1317.7	802.203			5 hours H2O control 7	86	1516.77	989.632
5 hours 10 nM SAG 6	157	1206.92	1103.58			5 hours H2O control 7	87	717.488	768.845
5 hours 10 nM SAG 6	158	1095.16	790.974			5 hours H2O control 7	88	1027.26	783.847
5 hours 10 nM SAG 6	159	986.65	717.641			5 hours H2O control 7	89	1037.26	747.247
5 hours 10 nM SAG 6	160	1137.78	758.441			5 hours H2O control 7	90	1158.16	823.014
5 hours 10 nM SAG 6	161	1005.37	726.86			5 hours H2O control 7	91	1019.74	793.07
5 hours 10 nM SAG 6	162	1316.36	878.399			5 hours H2O control 7	92	1090.64	834.033
5 hours 10 nM SAG 6	163	1161.19	1106.36			5 hours H2O control 7	93	960.274	795.254
5 hours 10 nM SAG 6	164	1419.87	866.728			5 hours H2O control 7	94	978.087	769.145
5 hours 10 nM SAG 6	165	1077.5	844.365			5 hours H2O control 7	95	716.224	668.07
5 hours 10 nM SAG 6	166	1615.98	997.413			5 hours H2O control 7	96	993.452	778.655
5 hours 10 nM SAG 6	167	1357.53	872.133			5 hours H2O control 7	97	931.712	801.667
5 hours 10 nM SAG 6	168	1097.89	783.313			5 hours H2O control 7	98	935.514	800.164
5 hours 10 nM SAG 6	169	1175.43	797.761			5 hours H2O control 7	99	835.895	737.034
5 hours 10 nM SAG 6	170	1329.69	889.504			5 hours H2O control 7	100	765.608	760.648
5 hours 10 nM SAG 6	171	1248.48	897.159			5 hours H2O control 7	101	1039.2	781.613
5 hours 10 nM SAG 6	172	1532	1162.19			5 hours H2O control 7	102	1180.11	1942.46
5 hours 10 nM SAG 6	173	1606.96	936.818			5 hours H2O control 7	103	761.424	761.201
5 hours 10 nM SAG 6	174	1616.06	1038.18			5 hours H2O control 7	104	861.082	772.677
5 hours 10 nM SAG 6	175	1091.97	847.162			5 hours H2O control 7	105	927.729	838.2
5 hours 10 nM SAG 6	176	1672.34	1136.01			5 hours H2O control 7	106	838.258	792.411
5 hours 10 nM SAG 6	177	1831.49	5617.26			5 hours H2O control 7	107	835.409	803.589
5 hours 10 nM SAG 6	178	1699.34	1990.65			5 hours H2O control 7	108	727.438	662.265
5 hours 10 nM SAG 6	179	1548.45	851.67			5 hours H2O control 7	109	694.119	658.309
5 hours 10 nM SAG 6	180	1234.55	922.732			5 hours H2O control 7	110	775.841	676.742
5 hours 10 nM SAG 6	181	1494.85	879.258			5 hours H2O control 7	111	755.627	700.115
5 hours 10 nM SAG 6	182	1218.07	982.325			5 hours H2O control 7	112	749.774	730.098
5 hours 10 nM SAG 6	183	1548.67	876.264			5 hours H2O control 7	113	891.642	715.621
5 hours 10 nM SAG 6	184	2024.69	1455.29			5 hours H2O control 7	114	815.364	777.261
5 hours 10 nM SAG 6	185	1051.44	903.138			5 hours H2O control 7	115	804.545	706.585
5 hours 10 nM SAG 6	186	1346.94	3146.08			5 hours H2O control 7	116	940.386	804.354
5 hours 10 nM SAG 6	187	1099.9	835.269			5 hours H2O control 7	117	1198.82	938.432
5 hours 10 nM SAG 6	188	2116.38	1657.58			5 hours H2O control 7	118	1166.12	815.301
5 hours 10 nM SAG 6	189	1077.52	849.951			5 hours H2O control 7	119	880.352	856.136
5 hours 10 nM SAG 6	190	1223.19	1124.43			5 hours H2O control 7	120	1036.6	850.873
5 hours 10 nM SAG 6	191	1775.7	4927.21			5 hours H2O control 7	121	1678.94	1213.39
5 hours 10 nM SAG 6	192	1284.43	1123.29			5 hours H2O control 7	122	1858.66	1492.85
5 hours 10 nM SAG 6	193	1673.37	2304.52			5 hours H2O control 7	123	1042.07	868.887
5 hours 10 nM SAG 6	194	1559.54	3683.51			5 hours H2O control 7	124	1157.74	868.286
5 hours 10 nM SAG 6	195	1407.54	2213.08			5 hours H2O control 7	125	997.089	839.619
5 hours 10 nM SAG 6	196	973.142	754.953			5 hours H2O control 7	126	1041.37	842.6
5 hours 10 nM SAG 6	197	929.652	742.088			5 hours H2O control 7	127	1026.69	877.128
5 hours 10 nM SAG 6	198	1665.78	2023.36			5 hours H2O control 7	128	984.809	804.317
5 hours 10 nM SAG 6	199	1317.41	823.982			5 hours H2O control 7	129	1136.78	868.971
5 hours 10 nM SAG 6	200	1977.33	844			5 hours H2O control 7	130	1027.77	832.839
5 hours 10 nM SAG 6	201	1805.08	801.891			5 hours H2O control 7	131	1080.38	912.682
5 hours 10 nM SAG 6	202	2086.81	974.493			5 hours H2O control 7	132	968.325	810.769
5 hours 10 nM SAG 6	203	1790.59	877.027			5 hours H2O control 7	133	1322.37	891.733
5 hours 10 nM SAG 6	204	1345.64	1923.74			5 hours H2O control 7	134	971.448	826.795
5 hours 10 nM SAG 6	205	1561.98	2376.37			5 hours H2O control 7	135	1076.15	1121.38
5 hours 10 nM SAG 6	206	1517.25	1542.61			5 hours H2O control 7	136	1248.37	1623.02
5 hours 10 nM SAG 6	207	1244.4	1749.9			5 hours H2O control 7	137	1077.1	1172.07
5 hours 10 nM SAG 6	208	1961.98	3222.71			5 hours H2O control 7	138	986.724	1000.74
5 hours 10 nM SAG 6	209	1277.91	1700.88			5 hours H2O control 7	139	1047.76	823.524
5 hours 10 nM SAG 6	210	1510.5	880.266			5 hours H2O control 7	140	870.991	789.571
5 hours 10 nM SAG 6	211	2063.07	1578.13			5 hours H2O control 7	141	1052.26	862.057
5 hours 10 nM SAG 6	212	1275.06	1160.23			5 hours H2O control 7	142	995.825	840.939
5 hours 10 nM SAG 6	213	1683.2	3198.92			5 hours H2O control 7	143	1230.41	901.464
5 hours 10 nM SAG 6	214	1727.73	3621.93			5 hours H2O control 7	144	955.924	972.933
5 hours 10 nM SAG 6	215	1574.29	1854.93			5 hours H2O control 7	145	932.525	945.71
5 hours 10 nM SAG 6	216	1504.43	2639.42			5 hours H2O control 7	146	994.236	1026.43
5 hours 10 nM SAG 6	217	995.505	759.604			5 hours H2O control 7	147	958.963	945.526
5 hours 10 nM SAG 6	218	1372.79	12587.4			5 hours H2O control 7	148	870.543	781.253
5 hours 10 nM SAG 6	219	1370.76	3420.03			5 hours H2O control 7	149	1263.31	817.756
5 hours 10 nM SAG 6	220	1222.26	821.573			5 hours H2O control 7	150	962.009	867.604
5 hours 10 nM SAG 6	221	1119.38	878.367			5 hours H2O control 7	151	1059.95	778.883
5 hours 10 nM SAG 6	222	827.713	706.904			5 hours H2O control 7	152	917.771	837.893
5 hours 10 nM SAG 6	223	796.645	738.373			5 hours H2O control 7	153	937.412	783.231
5 hours 10 nM SAG 6	224	887.683	667.696			5 hours H2O control 7	154	1022.85	794.926
5 hours 10 nM SAG 6	225	893.074	717.843			5 hours H2O control 7	155	1054.55	809.666
5 hours 10 nM SAG 6	226	1359.05	747.445			5 hours H2O control 7	156	1541.66	1152.33
5 hours 10 nM SAG 6	227	1016.6	803.736			5 hours H2O control 7	157	1099.96	787.073
5 hours 10 nM SAG 6	228	901.022	781.23			5 hours H2O control 7	158	755.556	705.399
5 hours 10 nM SAG 6	229	1078.88	804.732			5 hours H2O control 7	159	761.62	734.263
5 hours 10 nM SAG 6	230	1159.97	759.817			5 hours H2O control 7	160	764.455	754.921
5 hours 10 nM SAG 6	231	1243.58	1141.18			5 hours H2O control 7	161	1191.77	782.451
5 hours 10 nM SAG 6	232	1069.74	778.848			5 hours H2O control 7	162	873.13	730.613
5 hours 10 nM SAG 6	233	1218.79	1020.91			5 hours H2O control 7	163	811.231	741.341
5 hours 10 nM SAG 6	234	1473.53	857.396			5 hours H2O control 7	164	981.589	749.971
5 hours 10 nM SAG 6	235	1009.19	781.913			5 hours H2O control 7	165	793.581	738.943
5 hours 10 nM SAG 6	236	1528.6	1109.91			5 hours H2O control 7	166	792.085	722.786
5 hours 10 nM SAG 6	237	1254.43	1441.36			5 hours H2O control 7	167	842.542	751.515
5 hours 10 nM SAG 6	238	1161.35	1094.46			5 hours H2O control 7	168	1041.16	758.571
5 hours 10 nM SAG 6	239	1195.92	1159.99			5 hours H2O control 7	169	872.897	892.106
5 hours 10 nM SAG 6	240	1219.03	753.782			5 hours H2O control 7	170	1020.78	752.533
5 hours 10 nM SAG 6	241	1517.45	1703.31			5 hours H2O control 7	171	945.616	779.479
5 hours 10 nM SAG 6	242	1623.34	843.427			5 hours H2O control 7	172	876.967	775.353
5 hours 10 nM SAG 6	243	996.069	765.004			5 hours H2O control 7	173	1448.05	808.661
5 hours 10 nM SAG 6	244	1321.19	978.798			5 hours H2O control 7	174	816.908	725.446
5 hours 10 nM SAG 6	245	1172.51	815.243			5 hours H2O control 7	175	1042.35	786.845
5 hours 10 nM SAG 6	246	1229.24	752.837			5 hours H2O control 7	176	985.913	802.644
5 hours 10 nM SAG 6	247	1012.81	865.683			5 hours H2O control 7	177	1142.91	779.824
5 hours 10 nM SAG 6	248	1218.73	793.435			5 hours H2O control 7	178	1103.51	1324.8
5 hours 10 nM SAG 6	249	1139.91	1102.07			5 hours H2O control 7	179	834.249	797.571
5 hours 10 nM SAG 6	250	1294.4	1002			5 hours H2O control 7	180	940.35	775.598
5 hours 10 nM SAG 6	251	1382.92	3027.81			5 hours H2O control 7	181	904.693	770.666
5 hours 10 nM SAG 6	252	2038.86	1306.52			5 hours H2O control 7	182	1012.66	776.803
5 hours 10 nM SAG 6	253	1746.86	1575.61			5 hours H2O control 7	183	1239.51	871.732
5 hours 10 nM SAG 6	254	1742.37	3195.83			5 hours H2O control 7	184	960.1	777.687
5 hours 10 nM SAG 6	255	1466.38	3580.03			5 hours H2O control 7	185	1090.52	793.56
5 hours 10 nM SAG 7	0	675.013	665.29			5 hours H2O control 7	186	1120.65	780.293
5 hours 10 nM SAG 7	1	679.183	665.942			5 hours H2O control 7	187	1873.74	2491.92
5 hours 10 nM SAG 7	2	762.083	1303.69			5 hours H2O control 7	188	1245.27	815.467
5 hours 10 nM SAG 7	3	1123.2	807.116			5 hours H2O control 7	189	1210.88	823.625
5 hours 10 nM SAG 7	4	1039.1	1170.45			5 hours H2O control 7	190	964.029	780.46
5 hours 10 nM SAG 7	5	1182.22	1304.06			5 hours H2O control 7	191	994.441	760.504
5 hours 10 nM SAG 7	6	962.253	790.484			5 hours H2O control 7	192	966.925	797.314
5 hours 10 nM SAG 7	7	807.942	780.397			5 hours H2O control 8	0	856.246	778.393
5 hours 10 nM SAG 7	8	1317.53	1219.6			5 hours H2O control 8	1	903.959	762.835
5 hours 10 nM SAG 7	9	1089.09	1071.13			5 hours H2O control 8	2	967.15	752.278
5 hours 10 nM SAG 7	10	1087.56	816.33			5 hours H2O control 8	3	1679.79	824.224
5 hours 10 nM SAG 7	11	1006.96	758.076			5 hours H2O control 8	4	1840.89	1118.03
5 hours 10 nM SAG 7	12	808.139	721.557			5 hours H2O control 8	5	1190.22	1067.59
5 hours 10 nM SAG 7	13	1463.84	971.253			5 hours H2O control 8	6	1034.33	789.002
5 hours 10 nM SAG 7	14	1288.11	5520.31			5 hours H2O control 8	7	1142.32	791.608
5 hours 10 nM SAG 7	15	939.282	811.996			5 hours H2O control 8	8	882.879	793.073
5 hours 10 nM SAG 7	16	1032.26	1048.57			5 hours H2O control 8	9	1856.96	841.429
5 hours 10 nM SAG 7	17	770.937	662.972			5 hours H2O control 8	10	912.314	784.913
5 hours 10 nM SAG 7	18	895.932	699.587			5 hours H2O control 8	11	1151.26	791.591
5 hours 10 nM SAG 7	19	782.02	943.711			5 hours H2O control 8	12	1172.2	770.508
5 hours 10 nM SAG 7	20	937.323	725.56			5 hours H2O control 8	13	1731.83	827.254
5 hours 10 nM SAG 7	21	1019.65	746.768			5 hours H2O control 8	14	913.601	749.756
5 hours 10 nM SAG 7	22	893.81	985.527			5 hours H2O control 8	15	1082.87	820.176
5 hours 10 nM SAG 7	23	952.573	899.541			5 hours H2O control 8	16	1101.19	793.937
5 hours 10 nM SAG 7	24	856.019	853.879			5 hours H2O control 8	17	1655.53	983.696
5 hours 10 nM SAG 7	25	1005.27	838.003			5 hours H2O control 8	18	1468.48	936.858
5 hours 10 nM SAG 7	26	733.076	1286.17			5 hours H2O control 8	19	1618.38	1027.47
5 hours 10 nM SAG 7	27	1131.08	828.702			5 hours H2O control 8	20	1042.45	780.571
5 hours 10 nM SAG 7	28	1341.73	1744.95			5 hours H2O control 8	21	1722.14	1485.94
5 hours 10 nM SAG 7	29	1000.4	826.599			5 hours H2O control 8	22	1300.19	794.922
5 hours 10 nM SAG 7	30	1181.37	1104.59			5 hours H2O control 8	23	1376.77	996.561
5 hours 10 nM SAG 7	31	1028.16	1839.84			5 hours H2O control 8	24	1941.49	835.431
5 hours 10 nM SAG 7	32	1109.64	953.571			5 hours H2O control 8	25	2372.99	839.287
5 hours 10 nM SAG 7	33	1089.8	2235.6			5 hours H2O control 8	26	1235.41	897.041
5 hours 10 nM SAG 7	34	1041.38	1159.87			5 hours H2O control 8	27	892.242	821.272
5 hours 10 nM SAG 7	35	1429.6	1743.69			5 hours H2O control 8	28	1094.32	915.404
5 hours 10 nM SAG 7	36	1236.83	846.29			5 hours H2O control 8	29	862.91	804.759
5 hours 10 nM SAG 7	37	940.475	795.478			5 hours H2O control 8	30	858.582	689.162
5 hours 10 nM SAG 7	38	887.215	699.87			5 hours H2O control 8	31	1295.9	751.947
5 hours 10 nM SAG 7	39	1227.3	6131.19			5 hours H2O control 8	32	1365.32	748.651
5 hours 10 nM SAG 7	40	962.947	746.872			5 hours H2O control 8	33	1262.7	872.033
5 hours 10 nM SAG 7	41	1049.85	728.101			5 hours H2O control 8	34	1225.39	735.528
5 hours 10 nM SAG 7	42	1138.58	801.808			5 hours H2O control 8	35	1708.8	1129.54
5 hours 10 nM SAG 7	43	961.427	816.966			5 hours H2O control 8	36	833.221	732.31
5 hours 10 nM SAG 7	44	1068.12	821.52			5 hours H2O control 8	37	1299.71	751.767
5 hours 10 nM SAG 7	45	1042.28	1832.72			5 hours H2O control 8	38	1047.27	744.442
5 hours 10 nM SAG 7	46	1230.71	2194.62			5 hours H2O control 8	39	1384.3	838.502
5 hours 10 nM SAG 7	47	991.856	1748.65			5 hours H2O control 8	40	1579.54	835.045
5 hours 10 nM SAG 7	48	1090.57	808.43			5 hours H2O control 8	41	1583.38	963.255
5 hours 10 nM SAG 7	49	1008.9	795.521			5 hours H2O control 8	42	1636.96	840.736
5 hours 10 nM SAG 7	50	1515.98	938.98			5 hours H2O control 8	43	835.979	704.352
5 hours 10 nM SAG 7	51	1225.36	852.229			5 hours H2O control 8	44	1004.11	791.883
5 hours 10 nM SAG 7	52	1450.97	891.744			5 hours H2O control 8	45	1037.51	756.802
5 hours 10 nM SAG 7	53	1244.53	835.489			5 hours H2O control 8	46	1210.53	814.583
5 hours 10 nM SAG 7	54	1585.86	3932.78			5 hours H2O control 8	47	973.194	762.738
5 hours 10 nM SAG 7	55	943.086	759.152			5 hours H2O control 8	48	1237.58	787.823
5 hours 10 nM SAG 7	56	912.313	788.451			5 hours H2O control 8	49	1227.65	828.34
5 hours 10 nM SAG 7	57	745.244	651.493			5 hours H2O control 8	50	859.902	611.59
5 hours 10 nM SAG 7	58	770.93	658.288			5 hours H2O control 8	51	876.926	671.452
5 hours 10 nM SAG 7	59	1073.3	1233.5			5 hours H2O control 8	52	1062.34	774.459
5 hours 10 nM SAG 7	60	891.541	1948.94			5 hours H2O control 8	53	682.342	583.173
5 hours 10 nM SAG 7	61	850.037	718.148			5 hours H2O control 8	54	1030.96	655.715
5 hours 10 nM SAG 7	62	941.86	802.288			5 hours H2O control 8	55	801.179	669.661
5 hours 10 nM SAG 7	63	1364.97	1234.16			5 hours H2O control 8	56	995.45	758.925
5 hours 10 nM SAG 7	64	1160.45	911.283			5 hours H2O control 8	57	1072.61	672.425
5 hours 10 nM SAG 7	65	941.541	822.289			5 hours H2O control 8	58	842.431	626.556
5 hours 10 nM SAG 7	66	1339.77	839.98			5 hours H2O control 8	59	1033.33	728.112
5 hours 10 nM SAG 7	67	1065.11	880.621			5 hours H2O control 8	60	1092.69	730.251
5 hours 10 nM SAG 7	68	958.563	784.4			5 hours H2O control 8	61	866.247	772.092
5 hours 10 nM SAG 7	69	952.471	807.593			5 hours H2O control 8	62	863.732	697.09
5 hours 10 nM SAG 7	70	1036.42	1475.13			5 hours H2O control 8	63	1076.14	792.311
5 hours 10 nM SAG 7	71	910.154	801.157			5 hours H2O control 8	64	1253.61	893.492
5 hours 10 nM SAG 7	72	1176.16	2424.32			5 hours H2O control 8	65	1262.62	704.954
5 hours 10 nM SAG 7	73	1094.95	1054.14			5 hours H2O control 8	66	1059.7	673.05
5 hours 10 nM SAG 7	74	1159.78	828.042			5 hours H2O control 8	67	1015.87	685.236
5 hours 10 nM SAG 7	75	825.233	799.811			5 hours H2O control 8	68	1140.4	678.382
5 hours 10 nM SAG 7	76	1159.43	843.047			5 hours H2O control 8	69	1177.14	738.778
5 hours 10 nM SAG 7	77	1137.75	819.661			5 hours H2O control 8	70	1311.94	764.659
5 hours 10 nM SAG 7	78	1000.33	1011.1			5 hours H2O control 8	71	1063.84	682.795
5 hours 10 nM SAG 7	79	1003.3	936.835			5 hours H2O control 8	72	1159.88	714.478
5 hours 10 nM SAG 7	80	1094.28	844.87			5 hours H2O control 8	73	1135.73	772.452
5 hours 10 nM SAG 7	81	951.055	1310.13			5 hours H2O control 8	74	866.906	763.193
5 hours 10 nM SAG 7	82	1340.53	3299.6			5 hours H2O control 8	75	927.976	773.938
5 hours 10 nM SAG 7	83	931.314	785.603			5 hours H2O control 8	76	915.691	777.843
5 hours 10 nM SAG 7	84	1745.31	1087.25			5 hours H2O control 8	77	896.635	786.122
5 hours 10 nM SAG 7	85	1630.54	1963.55			5 hours H2O control 8	78	911.839	1620.95
5 hours 10 nM SAG 7	86	1840.88	2409.18			5 hours H2O control 8	79	826.877	769.9
5 hours 10 nM SAG 7	87	953.663	777.27			5 hours H2O control 8	80	906.897	822.751
5 hours 10 nM SAG 7	88	1112.74	1377.39			5 hours H2O control 8	81	844.695	782.906
5 hours 10 nM SAG 7	89	1208.45	813.887			5 hours H2O control 8	82	862.787	1081.02
5 hours 10 nM SAG 7	90	1111.45	2538.28			5 hours H2O control 8	83	1022.59	827.963
5 hours 10 nM SAG 7	91	1001.46	1969.9			5 hours H2O control 8	84	1413.79	971.322
5 hours 10 nM SAG 7	92	1017.14	2054.46			5 hours H2O control 8	85	1532.79	929.655
5 hours 10 nM SAG 7	93	1097.44	2022.08			5 hours H2O control 8	86	1400.33	845.347
5 hours 10 nM SAG 7	94	1174.31	2402.77			5 hours H2O control 8	87	1560.24	954.151
5 hours 10 nM SAG 7	95	1109.99	872.063			5 hours H2O control 8	88	1124.48	778.316
5 hours 10 nM SAG 7	96	1090.4	801.466			5 hours H2O control 8	89	1410.83	856.662
5 hours 10 nM SAG 7	97	1135.47	766.677			5 hours H2O control 8	90	1744.81	966.405
5 hours 10 nM SAG 7	98	1104.41	822.275			5 hours H2O control 8	91	1760.2	842.649
5 hours 10 nM SAG 7	99	1566.78	4940.4			5 hours H2O control 8	92	1705.77	875.444
5 hours 10 nM SAG 7	100	876.543	787.121			5 hours H2O control 8	93	1073.74	839.936
5 hours 10 nM SAG 7	101	799.529	762.967			5 hours H2O control 8	94	1085.51	820.474
5 hours 10 nM SAG 7	102	851.18	808.178			5 hours H2O control 8	95	1076.43	860.868
5 hours 10 nM SAG 7	103	884.167	809.772			5 hours H2O control 8	96	1771.47	1422.65
5 hours 10 nM SAG 7	104	842.441	915.694			5 hours H2O control 8	97	1505.45	905.971
5 hours 10 nM SAG 7	105	1055.49	1897.4			5 hours H2O control 8	98	1075.37	945.896
5 hours 10 nM SAG 7	106	839.809	1184.44			5 hours H2O control 8	99	1768.55	876.358
5 hours 10 nM SAG 7	107	1412.03	836.424			5 hours H2O control 8	100	932.806	876.656
5 hours 10 nM SAG 7	108	849.194	905.846			5 hours H2O control 8	101	1818.66	1193.18
5 hours 10 nM SAG 7	109	1513.37	2374.42			5 hours H2O control 8	102	870.944	804.728
5 hours 10 nM SAG 8	0	991.114	780.341			5 hours H2O control 8	103	2303.79	958.063
5 hours 10 nM SAG 8	1	1088.08	792.925			5 hours H2O control 8	104	880.571	866.33
5 hours 10 nM SAG 8	2	1001.27	770.211			5 hours H2O control 8	105	2100.26	1500
5 hours 10 nM SAG 8	3	725.303	710.381			5 hours H2O control 8	106	2053.43	1132.29
5 hours 10 nM SAG 8	4	970.537	790.893			5 hours H2O control 8	107	1836.64	1221.74
5 hours 10 nM SAG 8	5	1058.7	892.319			5 hours H2O control 8	108	868.634	711.396
5 hours 10 nM SAG 8	6	997.32	783.445			5 hours H2O control 8	109	1268.26	714.146
5 hours 10 nM SAG 8	7	767.083	725.955			5 hours H2O control 8	110	1159.27	859.897
5 hours 10 nM SAG 8	8	759.882	715.239			5 hours H2O control 8	111	881.803	714.077
5 hours 10 nM SAG 8	9	979.174	798.306			5 hours H2O control 8	112	1226.86	834.835
5 hours 10 nM SAG 8	10	840.425	747.893			5 hours H2O control 8	113	838.753	715.119
5 hours 10 nM SAG 8	11	771.857	710			5 hours H2O control 8	114	1251.73	746.068
5 hours 10 nM SAG 8	12	809.638	753.696			5 hours H2O control 8	115	1703.37	793.147
5 hours 10 nM SAG 8	13	905.018	747.335			5 hours H2O control 8	116	1081.11	771.255
5 hours 10 nM SAG 8	14	819.157	727.96			5 hours H2O control 8	117	1027.73	764.602
5 hours 10 nM SAG 8	15	1376.97	832.768			5 hours H2O control 8	118	1730.79	872.379
5 hours 10 nM SAG 8	16	1173.45	792.356			5 hours H2O control 8	119	1164.11	767.487
5 hours 10 nM SAG 8	17	1353.29	894.901			5 hours H2O control 8	120	1154.44	769.697
5 hours 10 nM SAG 8	18	1127.73	824.432			5 hours H2O control 8	121	1844.13	952.221
5 hours 10 nM SAG 8	19	857.511	814.82			5 hours H2O control 8	122	1256.2	892.088
5 hours 10 nM SAG 8	20	731.815	738.474			5 hours H2O control 8	123	1434.53	952.29
5 hours 10 nM SAG 8	21	711.561	740.596			5 hours H2O control 8	124	1212.21	790.057
5 hours 10 nM SAG 8	22	850.827	722.013			5 hours H2O control 8	125	1228.36	828.717
5 hours 10 nM SAG 8	23	743.679	717.09			5 hours H2O control 8	126	1827.57	942.863
5 hours 10 nM SAG 8	24	670.15	696.933			5 hours H2O control 8	127	1061.12	896.872
5 hours 10 nM SAG 8	25	777.591	715.959			5 hours H2O control 8	128	1598.27	857.984
5 hours 10 nM SAG 8	26	1083.1	787.297			5 hours H2O control 8	129	1364.27	873.029
5 hours 10 nM SAG 8	27	1666.09	2390.6			5 hours H2O control 8	130	924.346	633.627
5 hours 10 nM SAG 8	28	964.067	830.178			5 hours H2O control 8	131	1108.14	696.275
5 hours 10 nM SAG 8	29	758.1	754.176			5 hours H2O control 8	132	1038.39	776.026
5 hours 10 nM SAG 8	30	1366.39	796.512			5 hours H2O control 8	133	775.726	644.556
5 hours 10 nM SAG 8	31	1084.41	772.996			5 hours H2O control 8	134	887.727	673.688
5 hours 10 nM SAG 8	32	1084.69	788.511			5 hours H2O control 8	135	1318.85	689.337
5 hours 10 nM SAG 8	33	1026.31	780.634			5 hours H2O control 8	136	1201.77	708.938
5 hours 10 nM SAG 8	34	1405.56	776.416			5 hours H2O control 8	137	1112.6	1050.96
5 hours 10 nM SAG 8	35	1310.8	847.098			5 hours H2O control 8	138	1206.31	866.537
5 hours 10 nM SAG 8	36	1138.21	787.409			5 hours H2O control 8	139	1327.71	716.306
5 hours 10 nM SAG 8	37	1113.8	810.901			5 hours H2O control 8	140	1240.18	830.591
5 hours 10 nM SAG 8	38	1386.69	1721.2			5 hours H2O control 8	141	809.775	1255.99
5 hours 10 nM SAG 8	39	1548.47	837.44			5 hours H2O control 8	142	976.076	781.94
5 hours 10 nM SAG 8	40	1410.81	1756.32			5 hours H2O control 8	143	790.43	750.329
5 hours 10 nM SAG 8	41	1408.33	939.621			5 hours H2O control 8	144	845.744	782.704
5 hours 10 nM SAG 8	42	989.773	811.887			5 hours H2O control 8	145	870.622	737.335
5 hours 10 nM SAG 8	43	1050.63	785.318			5 hours H2O control 8	146	970.119	900.546
5 hours 10 nM SAG 8	44	816.655	744.054			5 hours H2O control 8	147	1011.74	1241.78
5 hours 10 nM SAG 8	45	780.84	734.359			5 hours H2O control 8	148	1347.1	920
5 hours 10 nM SAG 8	46	916.36	778.074			5 hours H2O control 8	149	1257.58	1090.7
5 hours 10 nM SAG 8	47	904.125	839.36			5 hours H2O control 8	150	784.077	791.886
5 hours 10 nM SAG 8	48	1033.73	895.091			5 hours H2O control 8	151	1086.9	933.143
5 hours 10 nM SAG 8	49	795.822	755.019			5 hours H2O control 8	152	1404.76	1358.06
5 hours 10 nM SAG 8	50	1162.28	787.622			5 hours H2O control 8	153	1095.46	775.62
5 hours 10 nM SAG 8	51	1538.83	782.84			5 hours H2O control 8	154	1609.89	974.52
5 hours 10 nM SAG 8	52	1393.29	819.492			5 hours H2O control 8	155	681.602	660.724
5 hours 10 nM SAG 8	53	1056.25	800.401			5 hours H2O control 8	156	861.705	768.069
5 hours 10 nM SAG 8	54	1150.47	812.668			5 hours H2O control 8	157	1383.82	1002.21
5 hours 10 nM SAG 8	55	1301.83	830.264			5 hours H2O control 8	158	1289.18	1014.32
5 hours 10 nM SAG 8	56	1386.63	830.149			5 hours H2O control 8	159	1267.18	997.638
5 hours 10 nM SAG 8	57	1030.39	762.964			5 hours H2O control 8	160	1383.53	1182.42
5 hours 10 nM SAG 8	58	1145.33	757.402			5 hours H2O control 8	161	1875.13	899.194
5 hours 10 nM SAG 8	59	1143.48	818.656			5 hours H2O control 8	162	1168.23	805.536
5 hours 10 nM SAG 8	60	1024.89	819.027			5 hours H2O control 8	163	1773.99	776.468
5 hours 10 nM SAG 8	61	1097.11	807.504			5 hours H2O control 8	164	1388.99	858.065
5 hours 10 nM SAG 8	62	1126.27	754.694			5 hours H2O control 8	165	1760.08	746.199
5 hours 10 nM SAG 8	63	1252.7	779.304			5 hours H2O control 8	166	812.861	688.101
5 hours 10 nM SAG 8	64	1310.83	938.464			5 hours H2O control 8	167	1073.51	1037.09
5 hours 10 nM SAG 8	65	1289.11	1847.58			5 hours H2O control 8	168	895.558	728.54
5 hours 10 nM SAG 8	66	789.056	743.604			5 hours H2O control 8	169	753.223	730.245
5 hours 10 nM SAG 8	67	969.281	752.466			5 hours H2O control 8	170	774.742	670.753
5 hours 10 nM SAG 8	68	1277.14	1059.08			5 hours H2O control 9	0	1105.33	1012.14
5 hours 10 nM SAG 8	69	868.727	775.179			5 hours H2O control 9	1	1591.24	868.317
5 hours 10 nM SAG 8	70	1139.37	859.983			5 hours H2O control 9	2	755.946	753.617
5 hours 10 nM SAG 8	71	890.494	779.261			5 hours H2O control 9	3	768.568	759.857
5 hours 10 nM SAG 8	72	1130.45	792.095			5 hours H2O control 9	4	816.316	749.718
5 hours 10 nM SAG 8	73	892.697	737.499			5 hours H2O control 9	5	1923.24	850.755
5 hours 10 nM SAG 8	74	1242.19	777.394			5 hours H2O control 9	6	1384.25	790.678
5 hours 10 nM SAG 8	75	1128.11	779.237			5 hours H2O control 9	7	742.19	744.02
5 hours 10 nM SAG 8	76	1439.3	819.028			5 hours H2O control 9	8	1173.89	814.889
5 hours 10 nM SAG 8	77	1524.59	801.436			5 hours H2O control 9	9	1401.57	805.616
5 hours 10 nM SAG 8	78	1433.4	808.459			5 hours H2O control 9	10	1201.68	818.481
5 hours 10 nM SAG 8	79	969.972	719.297			5 hours H2O control 9	11	922.749	887.049
5 hours 10 nM SAG 8	80	1685.69	821.138			5 hours H2O control 9	12	1413.22	902.389
5 hours 10 nM SAG 8	81	1067.6	764.637			5 hours H2O control 9	13	1712.06	886.281
5 hours 10 nM SAG 8	82	1449.56	791.685			5 hours H2O control 9	14	1324.19	981.739
5 hours 10 nM SAG 8	83	1116.52	798.744			5 hours H2O control 9	15	1311.53	836.885
5 hours 10 nM SAG 8	84	985.939	724.506			5 hours H2O control 9	16	1601.55	853.03
5 hours 10 nM SAG 8	85	1082.69	709.741			5 hours H2O control 9	17	1180.62	976.948
5 hours 10 nM SAG 8	86	1130.57	825.223			5 hours H2O control 9	18	1540.82	1645.59
5 hours 10 nM SAG 8	87	1305.89	2816.84			5 hours H2O control 9	19	1327.08	866.261
5 hours 10 nM SAG 8	88	921.914	752.959			5 hours H2O control 9	20	1169.74	1010.45
5 hours 10 nM SAG 8	89	1074.88	773.234			5 hours H2O control 9	21	952.188	775.386
5 hours 10 nM SAG 8	90	904.408	759.474			5 hours H2O control 9	22	1426.83	907.796
5 hours 10 nM SAG 8	91	1315.93	791.339			5 hours H2O control 9	23	1327.81	848.085
5 hours 10 nM SAG 8	92	1052.37	781.064			5 hours H2O control 9	24	1631.33	851.789
5 hours 10 nM SAG 8	93	842.95	738.07			5 hours H2O control 9	25	1886.47	858.102
5 hours 10 nM SAG 8	94	1170.51	780.808			5 hours H2O control 9	26	859.715	780.129
5 hours 10 nM SAG 8	95	1156.74	811.736			5 hours H2O control 9	27	604.996	600.187
5 hours 10 nM SAG 8	96	1158.32	772.048			5 hours H2O control 9	28	747.629	637.342
5 hours 10 nM SAG 8	97	1444.53	808.243			5 hours H2O control 9	29	660.69	618.101
5 hours 10 nM SAG 8	98	1221.07	792.896			5 hours H2O control 9	30	688.759	621.812
5 hours 10 nM SAG 8	99	1235.77	791.139			5 hours H2O control 9	31	666.321	629.022
5 hours 10 nM SAG 8	100	1240.95	786.924			5 hours H2O control 9	32	948.397	1127.27
5 hours 10 nM SAG 8	101	1024.9	758.269			5 hours H2O control 9	33	906.115	1854.15
5 hours 10 nM SAG 8	102	1070.52	766.687			5 hours H2O control 9	34	795.869	648.798
5 hours 10 nM SAG 8	103	942.084	759.646			5 hours H2O control 9	35	741.265	644.336
5 hours 10 nM SAG 8	104	1042.72	761.951			5 hours H2O control 9	36	682.196	761.494
5 hours 10 nM SAG 8	105	1053.59	813.738			5 hours H2O control 9	37	643.916	597.554
5 hours 10 nM SAG 8	106	880.556	688.091			5 hours H2O control 9	38	1245.46	851.963
5 hours 10 nM SAG 8	107	1099.94	724.805			5 hours H2O control 9	39	1291.33	906.387
5 hours 10 nM SAG 8	108	1053.46	739.969			5 hours H2O control 9	40	1383.63	904.817
5 hours 10 nM SAG 8	109	695.041	652.583			5 hours H2O control 9	41	1509.42	1549.37
5 hours 10 nM SAG 8	110	847.682	681.476			5 hours H2O control 9	42	1616.6	859.868
5 hours 10 nM SAG 8	111	1029.29	730.879			5 hours H2O control 9	43	1618.98	873.265
5 hours 10 nM SAG 8	112	1033.59	731.601			5 hours H2O control 9	44	1284.55	823.849
5 hours 10 nM SAG 8	113	948.085	707.207			5 hours H2O control 9	45	1077.35	797.752
5 hours 10 nM SAG 8	114	1358.47	783.761			5 hours H2O control 9	46	1508.96	844.133
5 hours 10 nM SAG 8	115	1233.31	796.887			5 hours H2O control 9	47	1090.83	770.704
5 hours 10 nM SAG 8	116	2034.52	2934.56			5 hours H2O control 9	48	1949.49	997.961
5 hours 10 nM SAG 8	117	1162.73	759.429			5 hours H2O control 9	49	951.736	731.133
5 hours 10 nM SAG 8	118	930.058	725.228			5 hours H2O control 9	50	1428.4	3655.84
5 hours 10 nM SAG 8	119	1237.58	765.765			5 hours H2O control 9	51	1634.33	954.839
5 hours 10 nM SAG 8	120	1297.48	790.138			5 hours H2O control 9	52	1460.43	867.225
5 hours 10 nM SAG 8	121	1198.01	758.123			5 hours H2O control 9	53	1691.58	844.763
5 hours 10 nM SAG 8	122	1159.3	756.866			5 hours H2O control 9	54	1118.93	823.349
5 hours 10 nM SAG 8	123	946.788	716.245			5 hours H2O control 9	55	1687.55	863.713
5 hours 10 nM SAG 8	124	1249.32	751.393			5 hours H2O control 9	56	1429.87	837.859
5 hours 10 nM SAG 8	125	890.439	699.937			5 hours H2O control 9	57	1262.79	815.667
5 hours 10 nM SAG 8	126	1089.64	872.428			5 hours H2O control 9	58	1383.88	844.623
5 hours 10 nM SAG 8	127	859.223	706.812			5 hours H2O control 9	59	1559.91	848.414
5 hours 10 nM SAG 8	128	805.863	682.774			5 hours H2O control 9	60	1647.68	985.173
5 hours 10 nM SAG 8	129	758.006	670.575			5 hours H2O control 9	61	1427.77	873.156
5 hours 10 nM SAG 8	130	686.504	638.197			5 hours H2O control 9	62	1238.46	814.878
5 hours 10 nM SAG 8	131	1074.35	745.423			5 hours H2O control 9	63	1812.3	1080.05
5 hours 10 nM SAG 8	132	991.02	703.446			5 hours H2O control 9	64	1866.58	853.484
5 hours 10 nM SAG 8	133	1083.83	732.486			5 hours H2O control 9	65	1909.35	869.223
5 hours 10 nM SAG 8	134	860.525	730.33			5 hours H2O control 9	66	1458.63	882.926
5 hours 10 nM SAG 8	135	965.044	739.782			5 hours H2O control 9	67	1396.06	879.174
5 hours 10 nM SAG 8	136	756.196	682.118			5 hours H2O control 9	68	1100.63	829.84
5 hours 10 nM SAG 8	137	821.928	704.434			5 hours H2O control 9	69	1276.95	805.704
5 hours 10 nM SAG 8	138	1050	744.446			5 hours H2O control 9	70	851.11	806.281
5 hours 10 nM SAG 8	139	1148.34	775.295			5 hours H2O control 9	71	1186.73	788.053
5 hours 10 nM SAG 8	140	1189.52	785.336			5 hours H2O control 9	72	1468.32	893.562
5 hours 10 nM SAG 8	141	770.288	659.111			5 hours H2O control 9	73	1188.21	800.013
5 hours 10 nM SAG 8	142	851.823	709.207			5 hours H2O control 9	74	1640.47	886.471
5 hours 10 nM SAG 8	143	944.503	741.385			5 hours H2O control 9	75	1595.97	820.399
5 hours 10 nM SAG 8	144	1226.78	751.73			5 hours H2O control 9	76	1751.49	889.115
5 hours 10 nM SAG 8	145	1131.25	759.197			5 hours H2O control 9	77	1666.2	830.298
5 hours 10 nM SAG 8	146	944.583	733.588			5 hours H2O control 9	78	1663.45	846.437
5 hours 10 nM SAG 8	147	1057.97	844.691			5 hours H2O control 9	79	1868.42	847.829
5 hours 10 nM SAG 8	148	932.049	731.907			5 hours H2O control 9	80	1552	877.59
5 hours 10 nM SAG 8	149	1001.89	758.801			5 hours H2O control 9	81	1448.91	869.444
5 hours 10 nM SAG 8	150	953.542	707.393			5 hours H2O control 9	82	1677.72	923.963
5 hours 10 nM SAG 8	151	1008.63	758.795			5 hours H2O control 9	83	1297.73	821.33
5 hours 10 nM SAG 8	152	1083.27	748.469			5 hours H2O control 9	84	1144.83	829.244
5 hours 10 nM SAG 8	153	1093.57	763.223			5 hours H2O control 9	85	976.172	785.088
5 hours 10 nM SAG 8	154	983.753	723.534			5 hours H2O control 9	86	1638.22	1765.35
5 hours 10 nM SAG 8	155	873.14	703.847			5 hours H2O control 9	87	872.219	703.943
5 hours 10 nM SAG 8	156	1202.61	778.776			5 hours H2O control 9	88	1014.7	742.768
5 hours 10 nM SAG 8	157	1057.13	736.812			5 hours H2O control 9	89	806.48	696.882
5 hours 10 nM SAG 8	158	973.049	748.788			5 hours H2O control 9	90	757.236	686.487
5 hours 10 nM SAG 8	159	965.386	714.75			5 hours H2O control 9	91	659.401	639.171
5 hours 10 nM SAG 8	160	965.026	682.479			5 hours H2O control 9	92	649.664	692.682
5 hours 10 nM SAG 8	161	964.451	741.233			5 hours H2O control 9	93	882.111	690.772
5 hours 10 nM SAG 8	162	948.814	731.589			5 hours H2O control 9	94	1074.77	1176.39
5 hours 10 nM SAG 8	163	932.502	715.212			5 hours H2O control 9	95	926.817	682.772
5 hours 10 nM SAG 8	164	943.346	706.223			5 hours H2O control 9	96	1336.77	792.508
5 hours 10 nM SAG 8	165	916.533	684.183			5 hours H2O control 9	97	861.183	721.46
5 hours 10 nM SAG 8	166	910.601	675.718			5 hours H2O control 9	98	1203.29	723.062
5 hours 10 nM SAG 8	167	850.172	694.853			5 hours H2O control 9	99	1033.03	744.085
5 hours 10 nM SAG 8	168	1101.18	744.142			5 hours H2O control 9	100	1023.16	757.755
5 hours 10 nM SAG 8	169	908.836	725.128			5 hours H2O control 9	101	1068.42	1116.55
5 hours 10 nM SAG 8	170	1123.09	748.356			5 hours H2O control 9	102	769.661	686.652
5 hours 10 nM SAG 8	171	728.87	657.641			5 hours H2O control 9	103	892.776	684.375
5 hours 10 nM SAG 8	172	810.398	694.134			5 hours H2O control 9	104	861.294	678.39
5 hours 10 nM SAG 8	173	701.576	632.957			5 hours H2O control 9	105	994.175	751.481
5 hours 10 nM SAG 8	174	701.93	650.925			5 hours H2O control 9	106	1009.47	768.411
5 hours 10 nM SAG 8	175	1007.44	737.714			5 hours H2O control 9	107	1395.81	800.702
5 hours 10 nM SAG 8	176	1015.29	733.442			5 hours H2O control 9	108	874.499	756.336
5 hours 10 nM SAG 8	177	999.301	725.577			5 hours H2O control 9	109	813.79	727.603
5 hours 10 nM SAG 8	178	1011.25	714.818			5 hours H2O control 9	110	889.442	717.144
5 hours 10 nM SAG 8	179	906.536	676.657			5 hours H2O control 9	111	958.6	694.675
5 hours 10 nM SAG 8	180	909.425	677.641			5 hours H2O control 9	112	945.433	728.776
5 hours 10 nM SAG 8	181	864.022	713.536			5 hours H2O control 9	113	943.341	726.501
5 hours 10 nM SAG 8	182	932.727	723.758			5 hours H2O control 9	114	885.888	683.831
5 hours 10 nM SAG 8	183	922.538	712.794			5 hours H2O control 9	115	793.048	746.32
5 hours 10 nM SAG 8	184	939.726	724.631			5 hours H2O control 9	116	826.164	781.506
5 hours 10 nM SAG 8	185	885.329	913.989			5 hours H2O control 9	117	810.007	758.442
5 hours 10 nM SAG 8	186	1094.82	888.884			5 hours H2O control 9	118	706.18	790.582
5 hours 10 nM SAG 8	187	1036.9	853.542			5 hours H2O control 9	119	699.428	781.965
5 hours 10 nM SAG 8	188	1075.54	746.491			5 hours H2O control 9	120	689.551	650.926
5 hours 10 nM SAG 8	189	760.998	713.553			5 hours H2O control 9	121	1037.36	700.771
5 hours 10 nM SAG 8	190	785.815	672.952			5 hours H2O control 9	122	725.716	674.355
5 hours 10 nM SAG 8	191	824.919	709.384			5 hours H2O control 9	123	1660.27	1209.94
5 hours 10 nM SAG 8	192	751.666	730.42			5 hours H2O control 9	124	1554.36	812.122
5 hours 10 nM SAG 8	193	807.162	676.393			5 hours H2O control 9	125	1560.14	856.201
5 hours 10 nM SAG 8	194	770.093	696.421			5 hours H2O control 9	126	1042.36	798.011
5 hours 10 nM SAG 8	195	667.307	618.676			5 hours H2O control 9	127	1698.08	859.236
5 hours 10 nM SAG 8	196	773.856	715.536			5 hours H2O control 9	128	1499	860.927
5 hours 10 nM SAG 8	197	657.701	648.073			5 hours H2O control 9	129	1638.8	928.732
5 hours 10 nM SAG 8	198	781.648	707.319			5 hours H2O control 9	130	1608.75	905.733
5 hours 10 nM SAG 8	199	832.516	685.778			5 hours H2O control 9	131	1654.75	1874.22
5 hours 10 nM SAG 8	200	797.8	665.899			5 hours H2O control 9	132	1958.91	1080.18
5 hours 10 nM SAG 8	201	662.947	636.437			5 hours H2O control 9	133	1835.3	1006.28
5 hours 10 nM SAG 8	202	681.519	615.856			5 hours H2O control 9	134	1948.3	843.35
5 hours 10 nM SAG 8	203	740.196	637.448			5 hours H2O control 9	135	1308.84	874.565
5 hours 10 nM SAG 8	204	752.085	661.688			5 hours H2O control 9	136	1140.21	799.17
5 hours 10 nM SAG 8	205	849.839	692.769			5 hours H2O control 9	137	2125.44	933.977
5 hours 10 nM SAG 8	206	678.553	641.098			5 hours H2O control 9	138	1158.9	806.534
5 hours 10 nM SAG 8	207	692.423	630.466			5 hours H2O control 9	139	1861.09	902.566
5 hours 10 nM SAG 9	0	911.297	671.368			5 hours H2O control 9	140	877.766	809.925
5 hours 10 nM SAG 9	1	1034.52	733.432			5 hours H2O control 9	141	1851.49	6845.9
5 hours 10 nM SAG 9	2	915.729	638.436			5 hours H2O control 9	142	993.75	804.269
5 hours 10 nM SAG 9	3	777.356	621.889			5 hours H2O control 9	143	1033.8	781.962
5 hours 10 nM SAG 9	4	1157.83	754.276			5 hours H2O control 9	144	2088.07	2408.38
5 hours 10 nM SAG 9	5	722.7	637.224			5 hours H2O control 9	145	841.138	798.453
5 hours 10 nM SAG 9	6	1096.17	800.839			5 hours H2O control 9	146	1869.97	944.513
5 hours 10 nM SAG 9	7	825.223	632.766			5 hours H2O control 9	147	2217.14	980.351
5 hours 10 nM SAG 9	8	968.853	675.506			5 hours H2O control 9	148	1852.52	968.427
5 hours 10 nM SAG 9	9	834.482	656.95			5 hours H2O control 9	149	1859.68	975.378
5 hours 10 nM SAG 9	10	767.36	618.897			5 hours H2O control 9	150	1070.48	803.345
5 hours 10 nM SAG 9	11	666.935	630.136			5 hours H2O control 9	151	1117.39	791.352
5 hours 10 nM SAG 9	12	716.183	645.695			5 hours H2O control 9	152	1580.9	941.243
5 hours 10 nM SAG 9	13	957.522	678.693			5 hours H2O control 9	153	1203.85	823.33
5 hours 10 nM SAG 9	14	1311.78	850.3			5 hours H2O control 9	154	1072.91	802.393
5 hours 10 nM SAG 9	15	828.717	675.04			5 hours H2O control 9	155	1229	822.362
5 hours 10 nM SAG 9	16	966.817	863.005			5 hours H2O control 9	156	1164.64	853.47
5 hours 10 nM SAG 9	17	802.887	652.917			5 hours H2O control 9	157	1014.73	779.695
5 hours 10 nM SAG 9	18	671.152	635.299			5 hours H2O control 9	158	1389.09	849.342
5 hours 10 nM SAG 9	19	760.684	625.243			5 hours H2O control 9	159	1169.89	789.134
5 hours 10 nM SAG 9	20	816.626	642.786			5 hours H2O control 9	160	992.662	757.194
5 hours 10 nM SAG 9	21	742.406	629.731			5 hours H2O control 9	161	1270.03	910.385
5 hours 10 nM SAG 9	22	1047.09	1092.36			5 hours H2O control 9	162	1299.47	787.72
5 hours 10 nM SAG 9	23	793.149	628.642			5 hours H2O control 9	163	1469.01	1538.07
5 hours 10 nM SAG 9	24	773.394	1090.48			5 hours H2O control 9	164	1230.55	1503.32
5 hours 10 nM SAG 9	25	911.024	1350.53			5 hours H2O control 9	165	1001.79	778.922
5 hours 10 nM SAG 9	26	1217.72	861.237			5 hours H2O control 9	166	2089.21	1428.11
5 hours 10 nM SAG 9	27	692.4	644.834			5 hours H2O control 9	167	755.958	742.462
5 hours 10 nM SAG 9	28	1336.91	964.346			5 hours H2O control 9	168	1037.74	765.52
5 hours 10 nM SAG 9	29	1005.63	703.502			5 hours H2O control 9	169	1045.86	781.042
5 hours 10 nM SAG 9	30	1075.66	719.955			5 hours H2O control 9	170	722.007	780.282
5 hours 10 nM SAG 9	31	856.431	697.051			5 hours H2O control 9	171	1304.61	821.506
5 hours 10 nM SAG 9	32	1139.96	815.637			5 hours H2O control 9	172	1393.08	836.762
5 hours 10 nM SAG 9	33	893.201	715.471			5 hours H2O control 9	173	859.076	799.425
5 hours 10 nM SAG 9	34	1122.2	724.558			5 hours H2O control 9	174	1388.77	2067.13
5 hours 10 nM SAG 9	35	788.159	667.381			5 hours H2O control 9	175	753.94	756.024
5 hours 10 nM SAG 9	36	1012.18	726.489			5 hours H2O control 9	176	1243.7	795.564
5 hours 10 nM SAG 9	37	792.735	822.306			5 hours H2O control 9	177	831.212	755.139
5 hours 10 nM SAG 9	38	929.387	780.613			5 hours H2O control 9	178	785.562	724.876
5 hours 10 nM SAG 9	39	1087.6	3181.13			5 hours H2O control 9	179	1099.7	778.707
5 hours 10 nM SAG 9	40	1123.43	892.008			5 hours H2O control 9	180	1222.61	1688.41
5 hours 10 nM SAG 9	41	1088.64	833.387			5 hours H2O control 9	181	681.496	779.173
5 hours 10 nM SAG 9	42	819.486	791.841			5 hours H2O control 9	182	722.756	751.44
5 hours 10 nM SAG 9	43	945.612	1024.18			5 hours H2O control 9	183	1548.98	2534.27
5 hours 10 nM SAG 9	44	1223.25	945.672			5 hours H2O control 9	184	866.292	748.446
5 hours 10 nM SAG 9	45	791.932	654.195			5 hours H2O control 9	185	737.457	757.45
5 hours 10 nM SAG 9	46	938.236	1155.93			5 hours H2O control 9	186	747.382	728.521
5 hours 10 nM SAG 9	47	743.915	662.78			5 hours H2O control 9	187	712.799	735.402
5 hours 10 nM SAG 9	48	813.141	1035.25			5 hours H2O control 9	188	647.303	655.109
5 hours 10 nM SAG 9	49	939.791	1058.79			5 hours H2O control 9	189	655.089	623.1
5 hours 10 nM SAG 9	50	847.511	782.182			5 hours H2O control 9	190	988.279	718.628
5 hours 10 nM SAG 9	51	1089.37	1047.65			5 hours H2O control 9	191	911.057	684.052
5 hours 10 nM SAG 9	52	925.107	685.318			5 hours H2O control 9	192	879.706	721.853
5 hours 10 nM SAG 9	53	922.329	696.247			5 hours H2O control 9	193	1090.15	768.188
5 hours 10 nM SAG 9	54	965.298	703.836			5 hours H2O control 9	194	1599.64	1478.05
5 hours 10 nM SAG 9	55	1121.72	1074.51			5 hours H2O control 9	195	1222.14	805.14
5 hours 10 nM SAG 9	56	972.144	786.514			5 hours H2O control 9	196	715.661	770.86
5 hours 10 nM SAG 9	57	879.616	709.811			5 hours H2O control 10	0	775.664	759.231
5 hours 10 nM SAG 9	58	701.168	654.068			5 hours H2O control 10	1	662.471	704.915
5 hours 10 nM SAG 9	59	743.501	695.261			5 hours H2O control 10	2	687.338	688.071
5 hours 10 nM SAG 9	60	1233.93	787.648			5 hours H2O control 10	3	1178.16	1201.34
5 hours 10 nM SAG 9	61	1413.59	911.266			5 hours H2O control 10	4	1174.29	863.561
5 hours 10 nM SAG 9	62	1449.57	1301.83			5 hours H2O control 10	5	1201.23	781.865
5 hours 10 nM SAG 9	63	1517.62	1151.57			5 hours H2O control 10	6	1019.31	734.805
5 hours 10 nM SAG 9	64	1187.62	1018.83			5 hours H2O control 10	7	1987.86	2318.24
5 hours 10 nM SAG 9	65	1550.58	813.454			5 hours H2O control 10	8	1281.4	790.435
5 hours 10 nM SAG 9	66	1184.64	848.077			5 hours H2O control 10	9	733.305	687.344
5 hours 10 nM SAG 9	67	1327.39	806.65			5 hours H2O control 10	10	645.687	624.261
5 hours 10 nM SAG 9	68	1472.16	800.346			5 hours H2O control 10	11	1264.46	726.726
5 hours 10 nM SAG 9	69	1381.92	1103.94			5 hours H2O control 10	12	1126.51	703.738
5 hours 10 nM SAG 9	70	1445.64	1141.4			5 hours H2O control 10	13	1312.69	1154.06
5 hours 10 nM SAG 9	71	1195.51	767.919			5 hours H2O control 10	14	878.197	651.327
5 hours 10 nM SAG 9	72	1190.05	898.333			5 hours H2O control 10	15	1138.93	744.513
5 hours 10 nM SAG 9	73	1249.94	833.297			5 hours H2O control 10	16	894.283	878.677
5 hours 10 nM SAG 9	74	1246.68	858.509			5 hours H2O control 10	17	925.466	701.328
5 hours 10 nM SAG 9	75	1124.35	1071.99			5 hours H2O control 10	18	635.562	628.356
5 hours 10 nM SAG 9	76	709.976	682.435			5 hours H2O control 10	19	756.504	656.07
5 hours 10 nM SAG 9	77	1057.44	1034.26			5 hours H2O control 10	20	715.064	628.677
5 hours 10 nM SAG 9	78	1115.88	1916.68			5 hours H2O control 10	21	626.444	590.195
5 hours 10 nM SAG 9	79	1138.45	953.183			5 hours H2O control 10	22	1050.53	1256.95
5 hours 10 nM SAG 9	80	693.934	672.948			5 hours H2O control 10	23	589.857	576.342
5 hours 10 nM SAG 9	81	780.469	718.942			5 hours H2O control 10	24	898.554	697.665
5 hours 10 nM SAG 9	82	1170.16	874.005			5 hours H2O control 10	25	861.052	1091.85
5 hours 10 nM SAG 9	83	1318.62	847.17			5 hours H2O control 10	26	632.321	627.483
5 hours 10 nM SAG 9	84	1345.85	828.52			5 hours H2O control 10	27	610.318	571.835
5 hours 10 nM SAG 9	85	766.415	726.608			5 hours H2O control 10	28	658.387	642.142
5 hours 10 nM SAG 9	86	1256.78	872.157			5 hours H2O control 10	29	691.713	607.725
5 hours 10 nM SAG 9	87	1226.04	1122.26			5 hours H2O control 10	30	665.978	614.09
5 hours 10 nM SAG 9	88	765.937	710.29			5 hours H2O control 10	31	1130.43	1189.1
5 hours 10 nM SAG 9	89	1413.86	933.743			5 hours H2O control 10	32	980.008	790.756
5 hours 10 nM SAG 9	90	868.648	747.981			5 hours H2O control 10	33	795.313	698.675
5 hours 10 nM SAG 9	91	1105.3	1010.01			5 hours H2O control 10	34	1013.17	728.821
5 hours 10 nM SAG 9	92	1707.06	1208.39			5 hours H2O control 10	35	1004.24	700.966
5 hours 10 nM SAG 9	93	1055.87	920.255			5 hours H2O control 10	36	1192.21	719.583
5 hours 10 nM SAG 9	94	957.417	1501.89			5 hours H2O control 10	37	1043.93	736.673
5 hours 10 nM SAG 9	95	1187.5	1191.66			5 hours H2O control 10	38	991.463	721.654
5 hours 10 nM SAG 9	96	1283.77	898.518			5 hours H2O control 10	39	983.606	681.951
5 hours 10 nM SAG 9	97	1074.09	745.176			5 hours H2O control 10	40	980.68	850.848
5 hours 10 nM SAG 9	98	747.601	666.474			5 hours H2O control 10	41	923.955	704.83
5 hours 10 nM SAG 9	99	753.489	676.538			5 hours H2O control 10	42	1294.9	765.077
5 hours 10 nM SAG 9	100	993.094	736.88			5 hours H2O control 10	43	1128.41	717.968
5 hours 10 nM SAG 9	101	808.934	726.113			5 hours H2O control 10	44	1071.51	760.347
5 hours 10 nM SAG 9	102	680.098	685.304			5 hours H2O control 10	45	961.037	714.422
5 hours 10 nM SAG 9	103	933.172	711.245			5 hours H2O control 10	46	900.281	729.973
5 hours 10 nM SAG 9	104	707.783	686.682			5 hours H2O control 10	47	691.9	646.192
5 hours 10 nM SAG 9	105	1516.19	862.075			5 hours H2O control 10	48	939.013	730.808
5 hours 10 nM SAG 9	106	1137.03	778.51			5 hours H2O control 10	49	1139.45	788.535
5 hours 10 nM SAG 9	107	957.686	734.983			5 hours H2O control 10	50	1088.41	725.44
5 hours 10 nM SAG 9	108	1559.16	796.271			5 hours H2O control 10	51	966.889	745.08
5 hours 10 nM SAG 9	109	2370.07	1285.26			5 hours H2O control 10	52	963.766	700.539
5 hours 10 nM SAG 9	110	870.015	961.995			5 hours H2O control 10	53	777.198	689.216
5 hours 10 nM SAG 9	111	825.422	787.462			5 hours H2O control 10	54	1361.98	1342.75
5 hours 10 nM SAG 9	112	886.737	782.833			5 hours H2O control 10	55	968.567	809.3
5 hours 10 nM SAG 9	113	917.749	778.939			5 hours H2O control 10	56	1023.41	769.322
5 hours 10 nM SAG 9	114	960.898	914.008			5 hours H2O control 10	57	994.946	778.088
5 hours 10 nM SAG 9	115	1543.35	818			5 hours H2O control 10	58	912.276	745.437
5 hours 10 nM SAG 9	116	919.79	782.945			5 hours H2O control 10	59	937.892	754.922
5 hours 10 nM SAG 9	117	1183.25	792.014			5 hours H2O control 10	60	756.309	714.328
5 hours 10 nM SAG 9	118	1136.09	809.621			5 hours H2O control 10	61	705.996	773.401
5 hours 10 nM SAG 9	119	878.533	779.005			5 hours H2O control 10	62	635.275	649.546
5 hours 10 nM SAG 9	120	1528.73	818.647			5 hours H2O control 10	63	757.167	681.274
5 hours 10 nM SAG 9	121	913.486	795.709			5 hours H2O control 10	64	908.401	1122.27
5 hours 10 nM SAG 9	122	1426.12	1111.87			5 hours H2O control 10	65	1032.26	797.176
5 hours 10 nM SAG 9	123	1318.81	774.362			5 hours H2O control 10	66	1749.8	1267.79
5 hours 10 nM SAG 9	124	1078.53	765.713			5 hours H2O control 10	67	1380.94	794.032
5 hours 10 nM SAG 9	125	1284.54	789.875			5 hours H2O control 10	68	1246.55	771.376
5 hours 10 nM SAG 9	126	1005.37	790.606			5 hours H2O control 10	69	994.702	856.124
5 hours 10 nM SAG 9	127	953.165	774.385			5 hours H2O control 10	70	1629.32	5090.79
5 hours 10 nM SAG 9	128	974.152	769.537			5 hours H2O control 10	71	713.806	707.714
5 hours 10 nM SAG 9	129	999.24	807.579			5 hours H2O control 10	72	661.321	625.123
5 hours 10 nM SAG 9	130	1133.2	787.522			5 hours H2O control 10	73	863.146	685.375
5 hours 10 nM SAG 9	131	1371.89	1500.7			5 hours H2O control 10	74	634.052	666.281
5 hours 10 nM SAG 9	132	849.275	753.098			5 hours H2O control 10	75	941.068	674.023
5 hours 10 nM SAG 9	133	1469.7	1844.22			5 hours H2O control 10	76	760.451	621.534
5 hours 10 nM SAG 9	134	851.595	752.139			5 hours H2O control 10	77	976.401	708.724
5 hours 10 nM SAG 9	135	925.715	794.457			5 hours H2O control 10	78	981.794	1130.3
5 hours 10 nM SAG 9	136	1041.21	776.298			5 hours H2O control 10	79	1032.17	893.323
5 hours 10 nM SAG 9	137	1476.21	820.748			5 hours H2O control 10	80	893.266	691.921
5 hours 10 nM SAG 9	138	1163.47	796.13			5 hours H2O control 10	81	991.612	693.349
5 hours 10 nM SAG 9	139	1315.88	1196.25			5 hours H2O control 10	82	857.759	722.624
5 hours 10 nM SAG 9	140	1477.65	1290.61			5 hours H2O control 10	83	1164.18	717.426
5 hours 10 nM SAG 9	141	898.376	728.087			5 hours H2O control 10	84	762.344	749.366
5 hours 10 nM SAG 9	142	1082.19	790.325			5 hours H2O control 10	85	1727.61	798.078
5 hours 10 nM SAG 9	143	1747.06	950.947			5 hours H2O control 10	86	1599.03	903.452
5 hours 10 nM SAG 9	144	1252.27	812.034			5 hours H2O control 10	87	1594.17	792.319
5 hours 10 nM SAG 9	145	1501.96	1685.84			5 hours H2O control 10	88	987.05	755.782
5 hours 10 nM SAG 9	146	1490.08	836.182			5 hours H2O control 10	89	2092.87	1397.86
5 hours 10 nM SAG 9	147	1275.92	799.46			5 hours H2O control 10	90	870.651	760.189
5 hours 10 nM SAG 9	148	1489.86	1114.25			5 hours H2O control 10	91	1105.17	789.128
5 hours 10 nM SAG 9	149	1379.08	877.597			5 hours H2O control 10	92	987.521	790.804
5 hours 10 nM SAG 9	150	1355.08	839.679			5 hours H2O control 10	93	1097.51	807.934
5 hours 10 nM SAG 9	151	725.941	751.149			5 hours H2O control 10	94	1113.23	794.991
5 hours 10 nM SAG 9	152	1340.58	979.16			5 hours H2O control 10	95	1126.1	774.915
5 hours 10 nM SAG 9	153	1618.58	967.684			5 hours H2O control 10	96	1052.6	1017.82
5 hours 10 nM SAG 9	154	1392.12	1665.9			5 hours H2O control 10	97	1362.95	1142.67
5 hours 10 nM SAG 9	155	763.73	695.725			5 hours H2O control 10	98	1393.49	810.038
5 hours 10 nM SAG 9	156	919.096	756.847			5 hours H2O control 10	99	1482.5	884.232
5 hours 10 nM SAG 9	157	940.571	817.797			5 hours H2O control 10	100	1412.64	815.035
5 hours 10 nM SAG 9	158	1463.7	869.563			5 hours H2O control 10	101	859.557	748.33
5 hours 10 nM SAG 9	159	1508.19	942.619			5 hours H2O control 10	102	1383.44	791.238
5 hours 10 nM SAG 9	160	1305.76	994.527			5 hours H2O control 10	103	1637.92	803.516
5 hours 10 nM SAG 9	161	877.077	809.109			5 hours H2O control 10	104	1555.41	808.389
5 hours 10 nM SAG 9	162	1026.07	800.031			5 hours H2O control 10	105	1803.03	904.317
5 hours 10 nM SAG 9	163	748.861	744.947			5 hours H2O control 10	106	1548.71	825.686
5 hours 10 nM SAG 9	164	722.534	743.22			5 hours H2O control 10	107	2078.1	869.839
5 hours 10 nM SAG 9	165	937.019	788.837			5 hours H2O control 10	108	1768.73	1611.55
5 hours 10 nM SAG 9	166	1265.42	817.377			5 hours H2O control 10	109	1310.66	761.735
5 hours 10 nM SAG 9	167	936.84	887.817			5 hours H2O control 10	110	1861.47	915.362
5 hours 10 nM SAG 9	168	944.343	712.941			5 hours H2O control 10	111	1215.96	818.822
5 hours 10 nM SAG 9	169	851.867	769.951			5 hours H2O control 10	112	1100.1	780.761
5 hours 10 nM SAG 9	170	1000.25	1051.04			5 hours H2O control 10	113	1676.68	1253.91
5 hours 10 nM SAG 9	171	786.385	724.219			5 hours H2O control 10	114	1969.11	1124.91
5 hours 10 nM SAG 9	172	1969.81	887.561			5 hours H2O control 10	115	1316.64	802.803
5 hours 10 nM SAG 9	173	1788.3	897.044			5 hours H2O control 10	116	939.212	778.501
5 hours 10 nM SAG 9	174	899.141	746.629			5 hours H2O control 10	117	1778.24	1797.03
5 hours 10 nM SAG 9	175	1852.12	818.902			5 hours H2O control 10	118	1106.11	788.204
5 hours 10 nM SAG 9	176	1293.43	834.993			5 hours H2O control 10	119	925.316	794.998
5 hours 10 nM SAG 9	177	831.722	798.125			5 hours H2O control 10	120	897.055	746.755
5 hours 10 nM SAG 9	178	909.483	868.64			5 hours H2O control 10	121	1414.09	815.414
5 hours 10 nM SAG 9	179	1268.46	890.132			5 hours H2O control 10	122	976.468	774.276
5 hours 10 nM SAG 9	180	1375.39	802.108			5 hours H2O control 10	123	1138.7	2246.5
5 hours 10 nM SAG 9	181	1530.76	1418.03			5 hours H2O control 10	124	725.372	742.46
5 hours 10 nM SAG 9	182	976.552	774.25			5 hours H2O control 10	125	1652.32	819.303
5 hours 10 nM SAG 9	183	1088.35	769.147			5 hours H2O control 10	126	1485.66	786.229
5 hours 10 nM SAG 9	184	1934.62	1784.73			5 hours H2O control 10	127	861.79	777.62
5 hours 10 nM SAG 9	185	1588.29	812.592			5 hours H2O control 10	128	1823.2	827.353
5 hours 10 nM SAG 9	186	1754.39	2306.09			5 hours H2O control 10	129	1416.83	802.83
5 hours 10 nM SAG 9	187	1586.39	1186.45			5 hours H2O control 10	130	2275.82	2284.46
5 hours 10 nM SAG 9	188	927.898	757.008			5 hours H2O control 10	131	981.548	791.717
5 hours 10 nM SAG 9	189	1081.28	754.881			5 hours H2O control 10	132	1204.75	788.22
5 hours 10 nM SAG 9	190	946.217	764.507			5 hours H2O control 10	133	1325.8	802.742
5 hours 10 nM SAG 9	191	941.19	759.955			5 hours H2O control 10	134	1844.02	955.669
5 hours 10 nM SAG 9	192	1338.31	1428.93			5 hours H2O control 10	135	2085.94	835.387
5 hours 10 nM SAG 9	193	2667.23	1012.2			5 hours H2O control 10	136	1786.88	878.04
5 hours 10 nM SAG 9	194	1043.69	759.995			5 hours H2O control 10	137	2374.1	927.22
5 hours 10 nM SAG 9	195	2115.32	2571.67			5 hours H2O control 10	138	1152.42	904.381
						5 hours H2O control 10	139	1367.29	1017.29
						5 hours H2O control 10	140	1916.87	864.005
						5 hours H2O control 10	141	1449.83	923.345
						5 hours H2O control 10	142	1924.33	824.689
						5 hours H2O control 10	143	2557.49	852.575
						5 hours H2O control 10	144	1615.06	905.697
						5 hours H2O control 10	145	2181.88	849.667
						5 hours H2O control 10	146	1758.37	868.588
						5 hours H2O control 10	147	1228.15	797.72
						5 hours H2O control 10	148	1670.99	817.108
						5 hours H2O control 10	149	1887.36	827.859
						5 hours H2O control 10	150	2096.59	962.115
						5 hours H2O control 10	151	909.96	727.035
						5 hours H2O control 10	152	1284.24	1111.98
						5 hours H2O control 10	153	1163.99	1002.15
						5 hours H2O control 10	154	1074.65	984.954
						5 hours H2O control 10	155	1112.99	1028.41
						5 hours H2O control 10	156	1170.61	735.146
						5 hours H2O control 10	157	1175.25	777.896
						5 hours H2O control 10	158	1089.68	743.845
						5 hours H2O control 10	159	766.361	713.745
						5 hours H2O control 10	160	1065.69	816.233
						5 hours H2O control 10	161	729.365	759.515
						5 hours H2O control 10	162	1433.4	848.12
						5 hours H2O control 10	163	1354.76	809.574
						5 hours H2O control 10	164	1243.16	776.055
						5 hours H2O control 10	165	1516.34	822.072
						5 hours H2O control 10	166	939.216	821.451
						5 hours H2O control 10	167	1351.96	824.769
						5 hours H2O control 10	168	1210.42	798.885
						5 hours H2O control 10	169	1106.91	1519.39
						5 hours H2O control 10	170	1011.35	834.657
						5 hours H2O control 10	171	820.24	772.885
						5 hours H2O control 10	172	1152.52	799.207
						5 hours H2O control 10	173	1266.31	982.405
						5 hours H2O control 10	174	1189.19	790.801
						5 hours H2O control 10	175	1387.15	1329.85
						5 hours H2O control 10	176	1329.83	871.835
						5 hours H2O control 10	177	1176.15	763.476
						5 hours H2O control 10	178	1350.48	761.869
						5 hours H2O control 10	179	1616.44	2170.3
						5 hours H2O control 10	180	1214.48	804.566
						5 hours H2O control 10	181	1223.86	772.938
						5 hours H2O control 10	182	827.763	753.505
						5 hours H2O control 10	183	1166.82	776.371
						5 hours H2O control 10	184	1002.43	774.208
						5 hours H2O control 10	185	1165.73	1369.9
						5 hours H2O control 10	186	1060.48	784.251
						5 hours H2O control 10	187	936.174	711.817
						5 hours H2O control 10	188	2029.69	1538.48
						5 hours H2O control 10	189	1090.23	800.302
						5 hours H2O control 10	190	1567.71	1275.84
						5 hours H2O control 10	191	1532.72	805.189
						5 hours H2O control 10	192	1218.76	1601.67
						5 hours H2O control 10	193	1237.74	750.844
						5 hours H2O control 10	194	1516.22	1041.67
						5 hours H2O control 10	195	1163.95	745.44
						5 hours H2O control 10	196	1023.08	763.075
						5 hours H2O control 10	197	1181.4	3014.78
						5 hours H2O control 10	198	782.963	764.544
						5 hours H2O control 10	199	2889.76	872.248
						5 hours H2O control 10	200	2050.94	853.63
								1911.66
