# Supplementary material for: Non-canonical Hedgehog signaling regulates spinal cord and muscle regeneration in Xenopus laevis larvae
Source: eLife. 2021 May 6;10:e61804. doi: 10.7554/eLife.61804 (PMC8137141; doi:10.7554/eLife.61804)
Supplement: Figure 2—source data 1. [file elife-61804-fig2-data1.xlsx]

## Sheet: EGFP to iRFP670 by treatment
	0 hpa					4 hpa					8 hpa					12 hpa					28 hpa
	X	Y	EGFP:iRFP670 ratio			X	Y	EGFP:iRFP670 ratio			X	Y	EGFP:iRFP670 ratio			X	Y	EGFP:iRFP670 ratio			X	Y	EGFP:iRFP670 ratio
	820.054	-91.9448	1.42533			911.663	351.097	1.28335			423.661	92.3842	1.20702			271.297	459.149	0.601983			382.842	-442.52	1.07363
	202.103	-183.657	1.60795			1258.18	41.5576	1.37234			1000.17	342.667	1.27071			97.0855	161.067	0.720745			1182.68	-122.358	1.16256
	478.66	-590.788	1.10266			840.324	191.315	1.37789			551.801	263.112	0.961232			649.455	405.772	0.664024			1163.14	0.286367	1.00725
	1004.2	-378.808	1.36604			1042.93	-249.046	1.51636			544.417	148.649	1.26998			-0.248531	-0.0713138	0.623872			296.706	347.71	0.808261
	218.369	-42.0872	1.57578			645.449	209.148	1.20263			193.749	-78.9099	1.42099			129.706	154.374	0.707002			898.102	-190.975	1.5674
	557.153	-32.6469	1.48013			1109.74	-123.234	1.34813			256.551	11.9178	1.11476			999.044	465.485	0.751788			542.434	-214.993	1.27952
	446.26	-601.6	1.12329			460.405	-293.007	1.40368			641.506	140.699	1.224			1148.28	458.293	0.643958			285.15	-91.1272	1.27532
	-33.2121	-482.029	1.13486			1160.41	367.081	1.3339			253.406	277.815	1.05248			77.6249	260.421	0.634011			425.262	368.19	0.907416
	548.178	-70.1567	1.44919			1117.81	138.172	1.41061			297.855	-161.43	1.04171			953.493	464.523	0.847027			530.453	384.948	0.977666
	856.656	-3.41717	1.54389			385.802	67.4001	1.16748			101.921	-117.069	1.10794			139.124	293.355	0.61319			410.447	-189.125	1.26948
	182.136	-35.066	1.92106			384.13	-141.456	1.23865			227.154	-183.517	1.274			458.393	-226.807	0.797803			995.777	-139.616	1.5648
	467.549	-501.676	0.837438			920.857	141.724	1.49875			-1.20062	89.5686	1.00618			979.478	478.655	0.710884			540.125	-212.008	1.36922
	991.015	-455.143	1.26533			781.273	-105.026	1.27829			424.945	-166.681	1.15193			1165.82	455.97	0.627645			574.292	-182.558	1.54162
	61.9247	-105.171	1.29903			165.849	-13.9976	1.10248			179.137	25.2703	1.12694			1124.84	418.473	0.63726			489.696	-151.011	0.972388
	219.686	-676.059	1.0736			858.935	128.312	1.32694			813.505	231.146	1.13041			1098.89	425.813	0.649137			964.85	454.152	1.14188
	752.455	-457.221	1.57039			619.052	-258.544	1.29715			342.571	171.689	1.14235			1050.07	-237.56	1.49454			653.871	-109.718	1.31661
	516.691	-165.182	1.42128			1214.62	152.091	1.40466			1083.06	113.21	1.25024			2.83831	23.9402	0.595674			1089.09	-161.597	1.4008
	176.654	-97.484	2.0833			916.41	225.329	1.33624			199.207	-81.8772	1.25304			1044.31	461.018	0.639017			1113.9	309.346	1.16325
	163.018	2.87492	2.22724			759.643	-248.214	1.31748			124.981	-123.841	1.21162			1019.94	-129.336	1.04069			806.402	-204.733	1.1783
	84.1496	-51.9964	1.66234			1147.71	-130.892	1.29401			1103.54	284.37	1.18093			74.1412	172.241	0.559269			435.032	-267.86	0.938256
	-1.17261	-438.539	1.21915			650.054	259.969	1.1452			495.571	-243.89	1.15243			153.359	40.9252	0.661024			985.414	-13.3828	1.64012
	453.464	-137.016	1.7251			852.887	142.883	1.2479			459.126	173.674	1.09957			1172.25	-246.665	1.35723			1036.51	-82.8412	1.5225
	-27.9574	-705.38	1.21187			795.478	186.433	1.27307			912.04	182.52	1.33947			39.9543	25.4598	0.56696			1165.96	-17.4332	1.21275
	622.88	-170.167	1.38702			454.224	11.6768	1.20193			188.152	-111.028	1.12972			1119.13	-133.843	0.901418			1138.29	156.298	1.33842
	1003.46	19.4176	1.37928			743.089	230.884	1.22021			371.937	74.4384	1.16115			643.826	-224.638	0.737633			368.996	113.75	1.01919
	767.92	-142.079	1.52572			998.467	88.1549	1.29842			769.419	120.832	1.27503			1180.64	257.962	0.732032			710.298	-120.334	1.56775
	877.454	26.702	1.55749			506.97	252.087	1.09727			1041.12	98.2205	1.62699			1154.36	-149.342	1.27902			1136.09	170.055	1.15769
	785.977	0.348416	1.37086			287.164	-56.763	1.23769			1106.21	156.893	1.43167			1091.51	-170.023	0.871871			1117.06	289.56	1.12041
	97.005	-487.238	1.26015			1162.51	84.4077	1.45847			1113.17	124.288	1.52822			388.298	-19.6551	0.737654			887.366	33.4802	1.52718
	-1.56251	-709.417	1.28731			378.652	28.9058	1.20637			950.405	270.04	1.23883			250.886	-221.521	0.639927			439.039	-109.405	1.16148
	544.523	-82.1045	1.27032			674.677	104.196	1.22511			966.437	199.652	1.4264			121.958	286.469	0.509469			701.894	-79.2535	1.38554
	356.568	-20.5974	1.5487			676.781	-249.818	1.32386			951.007	270.566	1.11426			265.757	165.073	0.587442			869.351	438.938	0.911919
	317.092	-23.2181	1.9881			334.101	100.927	1.17311			380.558	-107.588	1.02822			1200.45	-133.648	0.971364			404.977	-179.365	1.1374
	733.959	-44.3764	1.30533			200.461	-131.884	1.24053			756.102	306.977	1.23543			150.313	69.6806	0.577712			388.416	-46.5343	1.10013
	202.325	78.2584	2.13412			542.583	-110.021	1.19168			1136.81	87.4077	1.36382			893.545	295.659	0.726372			203.645	-74.5811	1.32328
	664.564	-535.151	0.947636			604.697	222.649	1.16162			127.85	147.135	1.02886			291.831	-77.2716	0.725716			520.848	-196.314	1.00366
	782.664	-481.716	1.18382			1136.68	163.682	1.37056			222.609	159.412	1.00474			816.212	284.864	1.07055			682.091	48.6084	1.24634
	970.106	33.4945	1.73193			414.273	206.473	1.10122			727.393	118.543	1.15951			321.786	31.1722	0.724468			572.843	-59.9897	1.3081
	599.224	-65.5429	1.41185			542.482	249.658	1.27894			749.697	136.262	1.35377			291.564	87.5074	0.576936			512.754	-143.832	1.42356
	611.562	-35.0604	1.60248			1167.16	-91.018	1.38936			56.533	6.33256	1.18099			1023.42	-21.4702	0.939727			768.105	-120.221	1.53279
	-0.560085	-702.862	1.15816			597.585	239.122	1.16322			1079.88	104.135	1.15777			724.3	192.568	0.634756			210.622	-13.1138	1.42804
	906.841	-176.987	1.37131			717.993	238.035	1.35629			891.103	165.304	1.15589			266.896	360.987	0.519272			1055.21	-37.4839	1.48382
	-0.377488	-696.731	1.2114			518.731	216.784	1.2678			449.558	-124.739	1.05608			493.974	-59.0967	0.801667			951.096	5.16395	1.28073
	70.0528	-229.504	1.28558			938.632	68.0137	1.34988			48.3204	94.0296	1.05114			941.251	-212.054	0.879835			1085.83	356.171	0.866097
	616.704	-302.581	1.48834			885.442	-234.845	1.39655			1131.42	46.5328	1.45373			1206.97	373.99	0.583274			1017.42	-74.5289	1.55818
	905.592	-174.97	1.31555			773.127	-122.68	1.24165			160.07	101.881	1.30101			349.721	208.422	0.554537			1113.63	-49.3071	1.35359
	559.777	-32.4843	1.43843			1255.68	-242.831	1.44685			1147.4	-158.026	1.35487			152.852	69.3019	0.625006			362.452	-62.0129	1.40673
	497.203	-67.8796	1.47525			641.056	-120.647	1.25592			617.318	-154.922	1.29577			337.202	95.3338	0.634191			142.349	22.46	1.3056
	950.146	-388.155	1.30855			1153.06	203.825	1.37498			246.137	-129.848	1.01675			406.447	-154.157	0.719517			968.057	5.55831	1.40264
	636.705	-116.298	1.47975			905.424	145.841	1.32818			594.886	-99.3051	1.21062			1058.07	441.628	0.511553			1109.61	336.276	1.26613
	752.664	-49.7404	1.24544			524.257	207.933	1.23885			1146.8	-21.4748	0.997016			1147.25	413.13	0.576271			325.815	207.025	1.02141
	686.014	-47.3789	1.27883			1190.04	98.5825	1.3967			200.1	-113.492	1.11141			312.802	30.4888	0.640929			598.443	-98.8682	1.31098
	875.388	26.1797	1.39659			271.719	-122.787	1.08638			162.327	-74.3829	1.04024			317.62	204.947	0.665283			693.893	-121.682	1.36798
	589.932	114.609	1.5019			1029.97	265.271	1.37684			352.828	-213.036	1.1502			291	132.201	0.637859			1094.42	-48.8849	1.19851
	117.728	-691.652	1.1734			889.332	-285.506	1.31377			289.659	54.7595	1.20214			1029.6	-128.467	0.810191			184.629	-24.8534	1.35796
	308.918	-90.6478	1.49391			1166.34	-110.561	1.30492			972.28	225.105	1.18665			629.847	236.61	0.571379			584.822	-66.8433	1.27018
	492.37	-258.033	1.41669			1245.19	265.288	1.422			184.857	-153.996	1.39827			660.575	-33.2266	0.874192			988.094	-89.6236	1.4897
	203.536	76.8877	2.14396			375.4	-1.61219	1.15762			1146.75	-9.10593	1.38071			585.967	235.748	0.667319			401.639	-7.20321	1.13982
	-39.9076	-614.75	1.21187			701.537	-112.863	1.24853			538.601	-149.902	1.17206			344.327	-76.003	0.627395			1114.26	-50.4164	1.57037
	545.712	-108.784	1.30577			757.715	100.397	1.20369			213.205	-44.2688	0.992875			614.29	-24.9642	0.719279			998.331	459.486	0.890873
	419.233	-35.1138	1.67622			1040.76	187.033	1.38781			505.002	-216.33	1.15881			339.371	95.1082	0.626304			842.251	290.609	0.836395
	810.026	-455.376	1.22188			655.713	-101.02	1.29066			1035.8	192.586	1.32558			474.172	179.219	0.675657			1073.45	458.407	0.803193
	367.518	-191.794	1.48829			670.365	235.981	1.22789			494.822	-75.4511	1.22551			778.936	344.413	0.576392			880.75	375.428	0.813635
	174.078	-98.5498	2.0607			559.284	-166.648	1.20481			399.633	14.9407	1.14093			149.161	117.924	0.59785			435.349	-71.6564	1.15392
	561.604	-121.142	1.33917			445.777	-86.6037	1.36254			565.816	29.7884	1.35417			196.15	207.25	0.488855			985.422	-89.0743	1.5854
	380.963	-40.8159	1.5023			1140.73	-209.276	1.44904			518.47	-91.1742	1.10283			670.85	-120.867	0.763267			619.272	-116.062	1.30982
	917.547	-271.785	1.34079			984.742	-112.544	1.39754			144.226	113.603	1.15423			848.036	154.223	0.582321			528.145	-68.596	1.46511
	225.442	-2.39386	1.57358			1043.89	-342.883	1.42147			213.97	40.8184	1.11423			466.285	-183.778	0.764293			447.433	-46.7136	1.22268
	373.378	-113.323	1.37618			1071.74	-103.472	1.34967			934.609	349.25	1.28552			621.276	213.649	0.636775			1095.91	-47.3512	1.77298
	385.161	-97.8376	1.69239			933.978	222.527	1.34174			863.464	-105.689	1.32435			827.516	-211.187	1.15958			428.24	80.8129	1.41825
	797.822	-450.54	1.47244			396.483	-97.6193	1.27535			267.62	48.4703	1.09916			303.384	55.1509	0.73637			665.174	26.2039	1.17751
	-64.9075	-664.37	1.22			314.178	-24.9695	1.15061			477.137	-221.66	1.2153			1179.7	384.07	0.579811			1122.58	-35.011	1.80505
	104.808	-299.628	1.69759			541.934	177.569	1.15405			460.336	-77.2205	1.10609			642.668	-13.8944	0.707656			183.088	-25.3298	1.3964
	-12.6394	-616.552	1.11257			900.456	-272.116	1.41593			588.327	-131.937	1.20716			1164.8	395.389	0.560906			511.694	-10.2355	1.51388
	577.492	-558.554	1.74562			1166.54	187.237	1.39425			833.882	86.8598	1.21974			1187.86	283.267	0.619409			774.127	-50.3554	1.60071
	652.61	-67.5424	1.42324			465.683	175.78	1.1959			308.11	83.5183	1.0563			484.495	194.148	0.560671			388.513	35.4054	1.17033
	944.389	-383.493	1.10044			473.102	-178.889	1.30749			465.226	172.604	0.96969			775.306	-108.965	0.772643			393.539	79.1609	1.04386
	-0.218131	-700.626	1.21226			1107.54	302.463	1.31884			1037.14	96.5532	0.929133			876.002	196.378	0.841417			473.539	-115.681	1.82468
	384.554	-237.769	1.43352			275.464	-195.681	1.24706			112.827	-93.0559	1.32459			1163.82	-39.1538	0.902134			475.736	-114.259	1.5372
	492.57	-258.031	1.36933			159.109	-44.8395	1.2244			1089.48	174.6	1.47388			788.559	9.71004	0.764904			534.802	-1.35031	1.19003
	491.155	-123.35	1.37445			1171.72	266.597	1.57116			476.37	-171.576	1.15433			1055.62	-54.7018	0.898055			1104.08	-2.32044	1.46257
	223.34	-249.869	1.48949			662.497	62.0083	1.29154			973.473	399.591	1.5789			908.892	260.62	0.636187			539.314	-212.376	1.18785
	377.243	-21.4101	1.72208			1243.7	-247.768	1.41101			369.426	86.9506	1.12471			1080.77	-59.5906	0.715048			957.822	-195.261	1.65473
	795.202	-151.783	1.36193			1180.15	-206.871	1.49504			262.679	-97.9936	1.12754			1026.81	214.266	0.54286			416.45	124.07	1.27219
	590.47	-296.497	1.21549			968.499	63.5117	1.42283			168.789	55.5695	1.09188			797.469	-146.554	0.858775			876.395	-69.5085	1.34506
	668.989	-259.499	1.23296			1156.51	248.665	1.40081			150.082	37.9148	0.978516			1014.06	-21.1365	0.838375			978.738	6.32927	1.23011
	854.024	-449.977	1.54205			654.884	80.1197	1.24477			746.614	125.317	1.3713			851.992	245.499	0.679294			381.428	-43.6965	1.01306
	610.617	-37.2706	1.4418			997.873	34.2854	1.36102			597.929	152.152	1.14076			544.67	-147.714	0.767751			152.397	16.8541	1.1966
	555.954	-283.331	1.29646			959.64	-384.714	1.53908			259.026	-11.8677	1.14185			620.04	-56.2683	0.735426			393.306	79.2838	0.95324
	644.068	-27.7211	1.65317			201.886	-24.6205	1.10358			531.196	61.8808	1.2216			1163.72	269.263	0.622329			1166.35	-19.8784	1.4558
	451.963	-214.442	1.74649			898.045	53.8558	1.26039			1077.06	-59.8643	1.31449			505.061	-152.293	0.781653			874.082	-58.2643	1.5601
	945.82	-384.144	1.1414			958.482	-180.379	1.32461			115.012	-158.477	1.37503			399.242	110.882	0.655589			619.386	-138.15	1.15042
	-41.2759	-570.287	1.14695			748.105	271.482	1.16699			702.987	-203.687	1.2222			339.765	93.0811	0.558375			1044.73	27.1677	1.41117
	829.751	-421.886	1.3591			1055.18	225.32	1.36935			286.434	-22.5013	1.12966			952.55	-53.7612	0.739454			891.32	-3.12351	1.77467
	451.272	-126.085	1.55624			691.151	-125.382	1.3412			488.384	242.662	1.16412			1186.77	361.846	0.634862			618.77	-43.3945	1.50722
	446.472	-18.4708	1.58014			1029.97	-249.247	1.31222			562.398	92.8811	1.15321			1071.28	-59.4067	0.801569			563.829	-22.5322	1.2594
	41.3972	-85.9709	1.35386			605.817	51.2057	1.1584			537.465	26.5588	1.20866			841.745	-7.94585	0.752414			501.303	13.8609	1.08906
	808.769	-427.667	1.5221			521.039	-253.048	1.36328			851.298	-229.302	1.18433			654.491	235.697	0.502423			333.196	-38.0918	1.17073
	423.968	-55.0148	1.56805			911.811	59.8383	1.32742			736.109	-269.375	1.18233			996.91	-22.0616	0.764294			364.518	-62.178	1.13816
	620.37	-130.347	1.55163			957.137	157.162	1.30982			28.1891	96.5918	0.926737			580.284	-83.3423	0.890542			857.217	-79.2469	1.82436
	293.719	-278.999	1.34412			1011.93	284.674	1.25407			832.758	-284.449	1.17342			1194.08	-35.2272	0.820655			387.259	-39.2405	1.29953
	255.034	-139.827	1.56959			426.516	15.6034	1.12271			289.811	-22.1765	1.12424			845.071	172.579	0.606168			501.038	14.2682	0.952613
	501.571	-345.577	1.32631			1149.31	68.7784	1.47187			455.339	-49.3891	1.26556			990.793	151.336	0.604481			1067.86	-39.7652	1.49821
	875.602	-302.365	1.21133			1140.77	76.9631	1.24962			308.815	0.601537	1.10463			700.82	-116.66	0.812709			1106.55	-21.0011	1.72336
	732.507	-208.8	1.38746			825.053	-81.1788	1.30494			577.42	94.2336	1.13668			1082.99	-61.4405	0.695442			351.229	-7.20513	0.875257
	238.157	-312.908	1.3949			753.152	114.1	1.2046			1121.44	-301.413	1.39865			733.373	271.597	0.598714			1128.95	-1.51267	1.30328
	464.629	-631.058	1.06276			471.251	167.188	1.13309			103.125	-97.1653	1.00921			620.489	-122.794	0.723325			270.694	-36.8	1.23217
	648.357	-33.6316	1.62351			1035.77	-115.178	1.34135			465.779	70.3406	1.19257			620.037	196.912	0.63113			301.814	-54.7049	1.64972
	321.692	-103.447	1.44499			266.313	3.31192	1.13341			296.781	2.7931	0.977772			331.669	184.25	0.518342			304.812	-53.0983	1.56082
	86.2535	-349.019	1.06263			631.515	43.2664	1.20171			575.018	93.7442	1.11446			826.243	194.067	0.568158			275.826	-53.2879	0.947274
	826.198	-33.6855	1.45865			921.689	54.8132	1.3407			505.372	-194.32	1.11645			767.368	11.1119	0.811942			672.181	-42.2654	1.32716
	431.485	-613.252	1.042			796.909	-146.425	1.3528			99.1405	2.3933	1.14791			1127.68	-12.9301	0.926056			1064.87	-31.2881	1.75314
	902.445	-429.91	1.31228			802.026	224.15	1.38399			524.658	-116.429	1.11908			827.476	191.95	0.657979			506.222	11.5702	1.0793
	576.895	-71.0022	1.31569			1044.28	268.344	1.42162			101.555	-51.2957	1.04993			728.677	131.595	0.554017			1143.02	-17.685	1.67299
	948.092	-385.567	1.18757			1059.76	-154.706	1.4037			647.663	-254.73	1.15263			1036.61	153.447	0.615625			332.992	-93.7439	1.19745
	523.73	-7.29905	1.41135			613.441	150.478	1.21178			648.326	424.094	1.02927			891.944	30.5622	0.718428			514.345	-11.3178	1.19407
	-24.6598	-537.951	1.17067			1228.95	230.83	1.33048			293.809	-67.4016	1.06676			284.743	25.7393	0.604551			428.114	-50.0304	1.26483
	-2.76456	-630.911	1.1447			720.096	81.6108	1.21465			548.655	-250.007	1.20424			630.75	-122.581	0.677417			1086.47	-18.959	1.59422
	207.626	54.091	1.8515			1250.25	90.0071	1.24662			479.036	-220.471	1.16233			388.844	-139.15	0.609122			495.559	16.09	1.03426
	548.828	-68.5954	1.54213			765.143	259.228	1.21734			505.739	-215.3	1.15927			807.823	166.92	0.534246			268.193	-80.0449	1.14169
	645.59	-30.5373	1.76244			1011.75	-219.105	1.329			989.283	255.511	1.47684			975.739	230.664	0.587545			833.701	-25.2492	1.43829
	212.837	-521.946	1.07764			1187.25	180.971	1.41687			804.319	-108.531	1.3142			956.763	-72.1322	0.808749			856.227	-68.4906	1.16592
	-32.7268	-510.82	1.14074			953.698	51.4289	1.28137			174.178	7.48256	1.1166			248.443	50.2101	0.522969			1144.16	-0.895023	1.5104
	530.645	-40.6764	1.36939			1246.98	125.73	1.34673			333.052	123.543	1.02441			1063.37	-14.1027	0.780444			833.927	-72.2701	1.2254
	361.187	-90.2709	1.33638			1084.5	202.624	1.41747			599.192	57.9162	1.18587			1105.82	-60.6108	0.843502			370.315	10.2936	0.955375
	844.048	-18.4459	1.33954			670.069	196.808	1.20823			391.712	-228.128	1.28892			222.422	145.958	0.482894			331.119	2.4564	1.01505
	660.41	-79.3094	1.41975			706.328	-83.1431	1.32676			190.411	-50.9072	1.18678			630.023	152.091	0.555479			337.102	-39.6102	1.24353
	856.202	11.9933	1.3511			973.656	52.1066	1.30887			819.304	133.944	1.22268			336.49	-78.6613	0.65681			858.866	-68.3113	1.29894
	280.312	-276.873	1.73821			465.427	-215.521	1.16666			304.742	-61.2398	1.0065			740.898	10.6363	0.669483			347.829	8.85004	1
	202.245	-131.407	1.91139			1137.65	-153.273	1.42127			799.775	-55.1093	1.27556			277.021	126.459	0.585388			460.927	2.70073	0.831778
	279.34	-63.9291	1.58484			1051.2	76.7072	1.31221			101.588	-51.9575	1.09264			375.97	153.018	0.562804			787.669	-50.4935	1.29319
	303.272	-400.862	1.28819			323.832	-151.216	1.18243			658.862	-135.317	1.2252			1197.84	192.829	0.563807			477.482	12.8425	0.823869
	883.57	-448.307	1.31774			886.346	-180.23	1.2878			519.759	-90.6156	1.01524			1060.7	304.38	0.48385			411.233	-52.192	1.00633
	346.99	-304.093	1.68256			1045.74	245.494	1.36497			852.445	-225.739	1.25737			807.378	167.38	0.522056			261.915	0.101398	0.872966
	521.014	-410.786	1.36253			967.604	-274.552	1.29886			659.17	-223.067	1.09899			824.848	196.089	0.500634			141.65	24.8173	1.09981
	172.726	-399.004	1.75482			871.71	231.597	1.30214			476.951	194.487	1.1338			628.104	11.2457	0.597783			341.795	12.0596	0.94324
	611.145	-31.022	1.53734			899.375	-170.841	1.3324			1147.81	-251.67	1.32778			1050.96	149.068	0.549191			497.111	12.7901	1.07314
	188.48	-277.632	1.6513			409.201	-135.326	1.19916			626.292	-180.459	1.14658			825.247	195.547	0.463141			377.815	35.9642	0.884559
	676.394	-30.8148	1.54932			224.157	-104.377	1.1613			624.601	104.875	1.20952			871.214	279.541	0.763474			415.494	-41.9582	1.50547
	281.442	-125.938	1.65247			761.912	-131.608	1.28828			303.675	-62.9935	1.03315			652.489	234.693	0.506343			651.114	-31.9584	1.06283
	426.375	-464.276	0.890303			712.402	-103.497	1.20152			644.902	139.857	1.40203			959.497	142.843	0.593504			334.566	-37.6537	1.22154
	238.047	-51.191	2.1084			1069.46	98.0684	1.28898			1083.56	38.581	1.37501			503.289	-5.88719	0.686552			811.28	-35.7452	1.90242
	708.295	-135.89	1.46193			1144.91	31.9762	1.36995			1140.25	45.0092	1.47342			823.947	219.65	0.523616			381.646	-152.581	1.19491
	150.107	-229.315	1.53981			600.724	191.341	1.25288			867.861	253.101	1.59123			370.731	133.973	0.495491			307.204	23.73	1.07264
	749.237	-440.684	1.34223			1077.16	-79.2784	1.41533			536.766	236.342	1.11388			1123.43	277.765	0.521548			351.274	31.7694	1.06052
	670.896	-309.151	1.40583			721.566	20.8005	1.21858			902.443	235.237	1.31675			1211.12	180.469	0.525983			372.433	28.4326	0.882073
	382.474	-639.431	1.01504			854.003	-368.831	1.44378			867.701	254.263	1.52265			445.705	-173.028	0.863937			413.001	-85.5422	1.10491
	319.468	-85.6282	1.73279			719.42	96.5375	1.22563			446.137	-124.786	1.04972			947.361	200.776	0.68666			331.871	11.7364	0.930139
	169.528	-310.389	1.72271			1240.16	190.784	1.3318			411.229	-171.326	1.05806			376.407	-88.2403	0.530366			757.724	37.3199	1.22685
	276.907	-239.802	1.46251			190.985	39.7612	1.13597			853.974	-216.446	1.3031			1042.68	222.546	0.605547			294.082	15.2781	0.93871
	95.0672	-221.413	1.2773			1178.19	-34.5127	1.39971			422.156	-126.943	1.23221			364.154	153.001	0.528928			1050.21	2.78438	1.23214
	200.899	-65.3406	1.74103			774.224	92.3097	1.23985			606.527	-153.487	1.12462			257.247	136.338	0.474137			457.615	14.8388	0.752687
	615.064	-290.29	1.45657			618.723	60.604	1.2186			680.522	-274	1.2315			1009.04	542.447	0.385621			843.279	-47.5379	1.55847
	666.678	-82.7089	1.55913			402.496	-86.2166	1.20761			165.811	-118.591	1.0665			340.898	100.554	0.48257			802.321	-47.1153	1.16614
	575.008	-103.725	1.56428			978.24	41.291	1.21227			271.511	-43.5275	1.16812			595.077	-79.9809	0.758344			353.405	19.4279	0.940314
	634.548	-49.7948	1.32407			949.185	199.605	1.38142			834.513	112.284	1.30621			175.642	118.123	0.427837			342.9	12.4595	0.870963
	434.749	-304.247	1.3975			740.265	122.268	1.29994			433.351	142.067	1.06351			586.879	-17.9842	0.615119			374.026	20.212	0.872877
	-35.1758	-469.188	1.03305			897.389	192.351	1.3018			207.464	136.211	1.06177			937.697	150.249	0.633864			1049.84	-43.2672	1.69786
	667.252	-75.2403	1.28477			173.994	-239.504	2.21781			1113.1	-67.3342	1.24339			376.509	-146.075	0.512048			370.297	21.6603	0.816604
	279.45	-85.3304	1.71526			646.633	-236.075	1.29656			1036.03	267.287	1.51816			1006.42	186.319	0.47296			349.633	10.5591	0.87183
	408.591	-521.366	1.06889			1238.69	178.602	1.36372			836.138	85.5556	1.07343			482	-221.785	0.53978			557.356	-118.516	1.23193
	927.586	-16.5737	1.25634			986.844	-138.622	1.38314			1040.06	-101.158	1.29338			1038.21	215.818	0.572893			463.003	-57.5429	1.13523
	280.567	-63.7688	1.47832			1188.79	214.037	1.35731			119.358	-123.126	1.11039			941.289	-23.5742	0.75098			332.783	11.271	0.813894
	701.061	-196.643	1.29728			1025.65	-188.543	1.46236			997.894	238.002	1.21037			810.314	24.791	0.669937			292.681	7.68219	0.791608
	341.287	-96.6292	1.50834			1018.08	30.2635	1.41699			670.127	113.586	1.30379			152.284	-96.2452	0.486097			326.785	10.196	0.670758
	412.6	-138.563	1.7245			1226.34	-238.354	1.36758			889.9	-274.547	1.17771			1052.82	210.126	0.513154			316.873	-186.359	1.30168
	828.617	-34.3899	1.56213			900.339	-342.796	1.17377			579.574	108.833	1.23742			377.3	-64.7438	0.51936			273.865	13.2614	0.654971
	476.844	-352.502	1.46525			831.669	155.108	1.34369			704.892	-260.571	1.14185			286.429	53.1066	0.521981			273.734	13.8623	0.62587
	508.71	-52.5903	1.53059			935.726	31.1721	1.2633			496.819	-73.8164	1.14417			968.34	110.645	0.515681			466.889	12.8176	0.346591
	617.684	-301.135	1.44362			173.489	19.7451	1.08315			946.81	-104.37	1.34541			1184.6	184.953	0.558449			540.199	-337.627	1.03798
	329.669	-39.1065	1.32155			687.364	228.38	1.30135			353.27	24.8766	1.29279			659.619	87.6986	0.570311			952.932	-331.429	1.18525
	154.568	-293.766	1.63646			1210.77	-87.9375	1.43141			453.287	-77.2643	1.06915			412.077	-62.9082	0.518498			738.248	-334.653	1.15771
	170.322	-402.627	1.74823			564.209	88.1605	1.13797			858.248	63.5558	1.08485			823.435	-127.006	0.703738			1061.8	421.349	1.37308
	90.0618	-88.1755	1.31808			1183.88	306.214	1.40272			750.688	103.621	1.21982			1025.04	529.187	0.416194			1178.27	-328.046	1.13538
	554.127	-213.006	1.37549			484.276	9.37652	1.15189			548.529	104.908	1.17848			837.975	221.957	0.575128			1201.73	-327.693	1.03932
	549.395	-364.207	1.303			1112.1	-182.264	1.46447			346.492	4.18785	1.14839			957.71	194.217	0.607385			888.799	-332.393	1.13549
	538.243	-385.781	1.78979			758.408	250.665	1.2332			474.411	40.808	1.13092			1050.99	149.503	0.506359			896.863	-332.271	1.06928
	865.123	-417.478	1.34141			987.398	-171.484	1.39864			1057.71	217.766	1.31582			1186.09	181.944	0.60721			1201.49	-176.979	1.13688
	475.368	-352.224	1.23576			831.12	131.54	1.20996			74.9679	32.7532	1.04998			908.564	90.8227	0.693091			1200.95	-140.508	1.14818
	600.048	-102.846	1.3173			267.707	21.9731	1.18954			649.179	-264.243	1.37056			1031.82	543.825	0.390208			168.991	-28.7529	1.3012
	291.454	-651.918	1.1202			1238.53	229.827	1.41889			635.022	-33.1154	1.06474			655.227	-8.29635	0.659516			1184.02	-327.959	1.17918
	857.764	-18.3544	1.45891			1104.06	61.7047	1.39025			1023.83	16.7093	0.944955			891.16	227.44	0.598668			351.158	113.175	1.03839
	543.874	-35.8379	1.49424			459.573	253.299	1.35634			801.701	-53.5978	1.16346			747.946	105.62	0.513646			182.406	-43.0151	1.09612
	1022.4	-94.7706	1.9693			1048.69	-121.416	1.32803			39.8499	59.7413	0.952907			416.478	16.4982	0.497941			1199.18	-22.8375	1.04633
	627.613	-402.317	1.38789			1263.46	-95.3125	1.44761			75.7492	57.6748	0.826509			864.727	26.8189	0.581204			320.359	163.427	1.3075
	659.308	-80.3015	1.43212			1048.38	28.2119	1.31308			951.759	14.7371	1.22501			1085.24	203.02	0.553194			1200.53	-112.627	1.16634
	845.848	-13.8227	1.59856			1160.8	38.6742	1.29279			935.009	83.2407	1.34709			314.102	153.723	0.44068			1200.09	-83.6886	1.07825
	125.267	-135.272	2.0361			772.532	-158.942	1.30307			158.395	100.615	1.37191			790.109	-108.385	0.55599			1140.44	122.547	1.35799
	681.258	-460.806	1.43359			1180.74	-191.388	1.47392			857.124	-294.132	1.37089			1197.44	183.241	0.538052			898.413	-332.248	1.01594
	793.122	-444.008	1.55691			695.649	48.8123	1.24277			737.724	-130.718	1.27601			1199.93	68.5287	0.481317			1020.46	82.9321	1.65593
	177.323	-311.94	1.46544			269.892	-158.65	1.18726			810.66	-201.657	1.23564			835.552	-122.382	0.694661			980.044	116.916	1.62106
	29.7887	-11.7306	1.67327			1223.8	142.747	1.46363			496.446	-246.824	1.08972			993.778	-129.763	0.595861			1203.25	-294.035	1.13734
	834.077	-374.535	1.34009			859.614	109.266	1.22919			325.555	-46.0019	1.17698			472.499	-169.073	0.631676			648.201	-174.902	1.02816
	120.714	-269.461	1.73055			759.338	150.082	1.2861			841.773	54.0249	1.24127			507.652	-142.926	0.688717			542.113	-113.084	1.54343
	406.841	-129.255	1.4966			1158.53	321.557	1.37661			134.09	-66.3029	1.13018			465.294	-172.559	0.58217			1197.11	115.082	1.53567
	85.878	-239.369	1.24524			424.653	-91.8013	1.26396			350.941	-75.7605	1.03656			362.044	-76.66	0.508974			920.745	-12.1688	1.19975
	251.974	-112.375	1.68853			326.684	79.8567	1.11416			816.568	-191.672	1.10974			890.3	96.6362	0.525603			1127.33	47.3756	1.35699
	-81.2609	-677.197	1.18127			1198.52	88.7195	1.47978			1091.91	-83.0077	1.24788			654.199	181.78	0.497499			1023.65	56.609	1.64849
	790.491	-81.2682	1.54038			946.65	59.8243	1.253			710.128	-219.423	1.20235			972.36	68.4818	0.658559			398.053	117.351	1.32516
	585.195	-193.382	1.90561			1258.81	-66.0176	1.35018			207.345	107.797	0.826908			599.501	-119.411	0.672616			511.121	-85.3894	1.17847
	117.249	-269.147	1.68017			414.439	29.5561	1.1481			913.15	-140.23	1.38548			426.636	404.439	0.339291			475.801	-125.626	1.27875
	36.1941	-42.1711	1.80415			365.964	-161.804	1.27335			888.483	304.097	1.13877			330.738	104.24	0.46135			1075.38	-329.591	0.859541
	216.761	-85.2119	1.68965			764.704	51.2285	1.2647			476.566	-103.895	0.985714			597.801	-119.788	0.735028			397.492	8.72013	1.29681
	537.014	-384.488	1.72537			681.426	60.5328	1.23619			1146.29	95.9471	1.16692			842.36	515.814	0.439926			329.809	173.051	1.20298
	567.259	-17.6932	1.61159			884.533	65.2799	1.26881			771.991	-186.114	1.29306			430.937	50.9385	0.449926			1201.42	-172.329	1.1117
	483.919	-69.3607	1.58344			798.507	127.866	1.27549			785.562	-266.608	1.151			907.683	82.5999	0.48015			317.817	122.182	1.13745
	251.134	-641.428	1.10438			785.198	78.7221	1.21573			148.971	-76.6282	0.958486			999.701	215.031	0.537377			1003.87	-50.781	1.32132
	434.775	-32.296	1.7472			1033.52	111.362	1.30995			777.413	60.6983	1.3693			831.157	23.0757	0.62623			433.467	107.074	1.16685
	238.883	-80.4723	1.50039			1070.94	-131.162	1.3047			17.5206	13.6455	0.966744			912.756	72.2551	0.511012			393.118	-44.6905	1.08597
	449.223	-314.856	1.5258			953.297	98.6964	1.2369			682.665	-246.519	1.20257			338.211	88.9379	0.445613			812.878	58.5056	1.24725
	84.023	-49.3896	1.78057			681.717	172.313	1.22001			336.413	-4.13218	1.15126			685.902	120.377	0.495161			1203.01	-277.917	1.042
	584.342	-399.597	1.51588			1172.53	-279.607	1.47871			886.784	78.0544	1.1677			1153.58	80.4174	0.479635			609.535	-81.2832	1.16989
	803.464	-454.762	1.51206			788.038	228.756	1.29465			435.891	169.388	1.06969			504.488	437.859	0.366648			388.382	99.2525	1.5313
	249.337	-420.266	2.14585			257.565	-159.63	1.21151			825.255	-147.103	1.27385			382.464	134.944	0.520777			494.073	13.7369	1.15383
	806.767	-454.407	1.59687			306.353	5.98303	1.13515			221.941	-81.5811	1.36182			685.232	116.46	0.46325			1119.37	-138.104	1.92513
	857.426	-18.5506	1.8045			1088.53	364.703	1.46777			465.357	73.7988	1.14613			882.047	-16.2913	0.671255			812.652	58.3452	1.35983
	676.343	-349.4	1.46554			1044.62	-100.699	1.37455			706.963	88.2304	1.17784			688.021	-75.2519	0.62609			876.273	-160.982	1.16859
	387.93	-145.532	1.86797			427.993	-71.997	1.15829			742.543	234.755	1.1783			917.284	66.8258	0.595157			454.696	-157.041	1.31699
	291.28	-260.441	1.49818			901.2	-109.107	1.25155			592.933	21.5716	1.07926			986.287	66.8654	0.614022			651.424	-241.024	1.16545
	333.047	-401.123	1.88051			1268.39	-165.661	1.41763			483.777	-74.6163	1.13073			957.963	66.8893	0.601394			714.665	-135.417	1.15976
	416.986	-219.326	1.49164			968.527	-120.017	1.43734			682.977	-126.44	1.20302			570.258	72.3238	0.433983			405.347	193.746	1.09246
	1026.59	-291.929	1.30654			1017.84	136.377	1.38343			659.871	-102.126	1.20781			942.033	72.9228	0.532786			399.294	127.755	1.28157
	286.934	-377.588	1.73728			1162.99	-53.4192	1.36314			843.604	-124.984	1.25195			916.313	127.358	0.485844			659.231	67.1276	1.45122
	538.454	1.62127	1.53546			1145.91	-74.7526	1.487			1090.12	-105.701	1.29708			104.602	65.9965	0.373191			391.137	-46.0864	1.06647
	311.337	-314.39	1.32241			1116.68	-101.813	1.46373			922.924	-102.079	1.35112			311.889	153.587	0.394597			597.933	40.6493	0.954102
	645.06	-409.051	1.39159			971.588	255.558	1.28754			874.669	-206.948	1.17024			1141.01	227.611	0.554414			481.567	20.0848	1.1745
	304.429	-57.7362	1.47254			1247.2	-107.777	1.54476			1123.98	-267.219	1.36695			585.723	-8.13564	0.527125			320.732	125.179	1.16173
	411.262	-428.741	2.15126			1006.64	-207.377	1.37827			859.56	62.7725	1.26335			747.935	107.977	0.496235			619.518	46.21	1.04013
	189.816	-406.198	1.71135			954.494	250.399	1.33193			1122.42	-301.409	1.31196			855.182	-4.16543	0.612079			746.936	-156.883	1.2657
	520.676	-339.774	1.28008			1122.18	-161.474	1.34475			931.627	-119.472	1.28235			522.93	-6.38599	0.500545			491.004	25.134	1.25734
	554.597	-37.8155	1.49496			1057.29	172.579	1.29447			283.491	-135.079	1.091			882.337	483.64	0.371534			1055.98	-96.3918	1.28894
	683.525	-425.463	1.43721			1015.2	213.079	1.34366			342.976	26.1638	1.08356			42.6491	267.326	0.360638			980.15	-130.841	1.37448
	351.572	-334.462	1.53231			790.928	63.2273	1.29938			969.813	211.025	1.22924			515.449	167.198	0.4351			585.678	-8.10119	1.10653
	330.206	-314.637	1.50715			1250.57	53.2044	1.40516			467.989	-31.4898	1.02852			177.58	74.7813	0.379521			438.102	-39.1005	1.1646
	432.356	-311.116	1.51003			980.114	244.073	1.39091			853.798	67.3364	1.22533			957.671	-25.9732	0.595422			320.898	-120.928	1.28219
	355.058	63.0335	1.65443			968.661	-108.907	1.27642			787.98	-219.064	1.34289			823.969	-56.3293	0.772986			322.743	-119.538	1.3239
	372.953	-112.763	1.48816			926.929	-94.2625	1.32451			775.427	-221.891	1.1565			745.64	105.51	0.441637			1076.31	88.8663	1.51621
	361.68	-92.1174	1.63458			1115.87	-246.489	1.27832			1038.47	318.175	1.21847			1197.42	438.211	0.358716			1159.51	-120.783	2.31898
	592.412	-412.169	1.3846			1114.44	-284.56	1.53108			147.919	-77.4298	1.02156			467.869	401.932	0.31449			409.068	-102.563	1.03034
	511.612	-452.992	1.83861			185.92	-51.1111	1.25181			1024.98	281.446	1.24669			1172.56	183.254	0.489671			971.727	-91.3282	1.34649
	141.457	-87.3636	1.85342			1120.57	180.197	1.36152			528.329	58.8002	1.13713			1048.62	127.895	0.654116			926.537	-96.6083	1.34622
	444.126	-310.486	1.42923			1150.75	145.571	1.30049			922.169	-173.361	1.25271			1172.66	30.5674	0.638623			926.31	11.0054	1.50059
	444.911	-393.473	1.57072			1154.68	-204.273	1.50044			464.672	70.5818	1.06064			867.882	227.056	0.49246			375.53	-15.1543	1.57286
	549.763	-459.907	1.64847			1192.22	280.248	1.40105			184.126	-30.2164	1.00093			536.75	-120.359	0.529887			249.379	21.9238	0.981303
	237.013	-352.923	1.65004			575.143	17.8192	1.24863			451.089	-166.1	1.12727			415.462	-205.596	0.440457			477.982	-125.153	1.06202
	592.391	-408.047	1.42124			857.578	-167.582	1.44458			1051.17	-264.036	1.20354			1171.65	85.3093	0.414978			332.652	-70.8704	1.30407
	395.574	-235.382	1.61224			406.887	49.2304	1.13179			746.317	-113.776	1.38551			1175.34	72.7124	0.446192			957.877	-77.4426	1.33382
	448.234	-59.0671	1.45966			1163.12	116.021	1.3221			1066.41	-46.5146	1.24675			732.785	426.46	0.318656			423.869	-46.61	1.14079
	373.175	-347.885	1.7835			325.567	-73.4398	1.30928			503.977	-11.2596	1.03096			868.068	243.925	0.617664			461.573	-2.11191	1.22944
	931.894	-358.062	1.28439			630.753	24.7965	1.20698			656.137	158.442	1.17638			199.899	52.2047	0.381642			746.559	-100.928	1.2302
	499.681	-457.617	1.56408			878.112	-144.453	1.35358			124.514	-80.9449	1.11956			353.881	120.517	0.420747			374.079	-14.615	1.35797
	193.269	54.6198	1.52584			863.372	-48.4129	1.25504			605.003	118.945	1.24492			1174.74	81.9076	0.42024			583.943	-8.65434	1.15066
	579.181	-431.919	1.64485			886.116	252.986	1.2733			875.697	-49.0962	1.13237			710.988	-12.9441	0.488742			417.762	-140.436	1.09575
	315.471	-350.03	1.53669			1233.26	38.9536	1.30176			122.494	-80.9046	1.17955			1172.1	79.3785	0.423788			421.25	62.812	1.1445
	78.6595	-235.938	1.40631			778.65	142.728	1.26087			1117.56	-246.936	1.29354			350.01	153.361	0.360643			457.079	-148.631	1.50586
	228.615	-270.38	1.75301			1239.96	-9.968	1.56302			730.958	51.2047	1.44653			1008.88	503.595	0.348876			256.736	-17.8682	1.01354
	48.093	-82.9601	1.25911			733.617	73.9607	1.23746			773.466	-222.818	1.24256			1211	114.362	0.43562			932.543	-45.8324	1.29691
	415.17	-329.741	1.43842			1152.05	233.15	1.28054			146.371	36.7996	1.12459			1180.76	-55.977	1.19537			760.377	-90.5555	1.18978
	289.79	-326.776	1.45103			495.752	43.1701	1.26194			737.58	-57.6935	1.2303			497.71	111.957	0.399615			392.098	72.9974	1.16623
	767.151	-175.473	1.84301			543.397	34.1561	1.15994			827.04	-139.454	1.28771			536.703	388.21	0.336423			680.931	-158.782	1.29379
	485.389	-439.76	1.83722			728.819	-8.09769	1.23422			787.083	15.9691	1.12929			1162.46	173.708	0.412957			332.137	-70.328	1.34512
	276.547	-301.97	1.34296			1217.73	-134.724	1.36329			933.233	-116.786	1.44598			1073.54	425.031	0.319011			469.021	-149.286	2.20059
	265.142	-345.072	1.79067			211.787	-72.5855	1.1681			689.897	-41.0622	1.16482			484.887	15.0628	0.377811			500.215	14.4181	1.01572
	444.858	-394.479	1.76081			1245.75	-34.9385	1.39553			778.403	51.5006	1.22814			675.344	162.194	0.423853			366.29	-38.1376	1.66242
	571.479	-460.649	1.33634			1211.49	62.0296	1.32768			474.396	-171.047	1.07722			1042.94	305.07	0.343386			985.724	-32.8405	1.27961
	198.758	-402.465	1.74721			503.335	90.0729	1.13293			1017.81	45.2424	1.345			568.358	-31.5256	0.475969			1082.53	130.3	1.66151
	493.246	-380.448	1.42224			1159.54	-43.468	1.34344			650.006	-267.984	1.24737			620.756	-81.8068	0.63316			323.688	13.4556	0.952632
	402.765	-392.957	1.694			585.859	-144.497	1.20809			1066.2	-176.216	1.20496			913.004	72.0694	0.437002			585.69	-145.907	1.02485
	765.083	-176.138	1.45503			1269.08	-179.662	1.58034			839.025	-175.384	1.26143			1003.92	269.269	0.418854			583.42	-142.418	0.988252
	521.843	-389.028	1.54023			506.224	27.4862	1.07654			111.419	-160.039	1.56765			845.152	51.4667	0.428199			979.111	-116.211	1.38721
	128.997	-371.434	1.99529			1008.18	-75.0932	1.48436			575.929	-197.191	1.04923			933.562	49.5492	0.521728			367.797	-32.1913	1.59607
	809.985	-425.371	1.29129			992.125	72.3557	1.25466			1090.34	-262.602	1.27364			919.391	194.824	0.418641			595.579	40.804	0.959942
	388.259	-439.84	1.75498			795.384	257.331	1.29027			724.448	39.9662	1.2843			312.27	190.236	0.343315			1054.96	-82.0915	1.29005
	281.4	-424.528	1.95175			543.485	-133.088	1.22747			356.147	26.0402	0.952179			396.863	211.579	0.345875			488.99	25.5618	1.01468
	549.182	-412.094	1.44104			1091.42	254.318	1.41507			789.492	-81.0634	1.13096			285.521	85.9847	0.376772			451.621	68.4346	1.35802
	433.966	-413.911	1.79613			1204.37	223.873	1.45172			678.301	114.365	1.14856			891.905	145.335	0.44504			397.936	3.38825	1.53477
	329.823	-319.92	1.63799			1038.22	-272.164	1.38832			691.692	-67.7277	1.19496			227.989	91.4678	0.39288			857.892	-164.583	1.47551
	302.617	-354.387	1.7573			1001.23	229.723	1.37226			276.35	15.0581	1.10838			754.363	156.026	0.411588			751.019	-57.9113	1.28238
	882.759	-425.308	1.46001			835.424	-112.22	1.20037			456.526	20.2048	1.00889			513.631	346.166	0.306028			306.084	-2.43855	0.889793
	438.572	-79.201	1.29024			903.216	-22.9448	1.29013			328.2	-45.8784	1.06011			732.964	85.6637	0.582017			762.609	26.8103	1.32153
	507.055	-314.456	1.42241			283.923	-40.8352	1.1409			878.797	-198.812	1.21167			979.693	-21.1098	0.472984			392.911	7.66826	1.42642
	202.801	-64.5165	1.78545			589.47	-57.2589	1.20684			1007.48	-16.5472	1.23979			779.241	95.5923	0.3689			394.118	73.6978	1.29508
	313.84	-183.161	2.14397			521.876	-45.474	1.14157			229.152	-182.879	1.13562			1094.62	183.891	0.419544			473.256	-148.815	1.71837
	587.859	-435.733	1.52483			841.131	-160.803	1.33041			753.224	-163.831	1.15714			806.402	389.279	0.320014			422.957	-147.448	1.06396
	487.577	-67.201	1.87225			704.33	206.784	1.17385			947.133	-106.348	1.39735			1191.41	123.345	0.383443			313.904	18.6182	0.66987
	-44.8388	-497.353	3.13207			868.71	278.437	1.20407			776.174	-79.4934	1.26541			1029	401.532	0.310557			972.797	-94.4495	1.63608
	257.874	-367.632	1.69636			1170.88	-2.91394	1.25299			165.483	-117.029	1.13069			1182.45	70.4121	0.387912			310.179	4.25168	0.735045
	552.957	-237.392	1.11594			1227.9	-74.3354	1.46194			1067.99	-229.204	1.16414			553.081	46.6534	0.463175			623.74	-151.724	1.21908
	249.962	-387.047	1.67016			824.856	-53.0804	1.39091			874.089	-93.9086	1.18683			1185.05	88.5589	0.363557			305.121	-1.04587	0.776279
	314.367	-417.698	1.79741			273.489	-69.3089	1.1535			925.814	-110.974	1.37888			543.354	346.68	0.272372			757.008	-96.7628	1.13233
	78.4567	-278.694	1.23753			1105.79	46.4722	1.30434			371.439	-26.6056	0.960262			550.261	166.014	0.380517			267.075	-6.23172	0.770941
	339.14	-376.222	1.44566			539.59	-1.86079	1.16596			110.769	-24.8003	1.02166			525.294	185.877	0.400271			275.193	0.0629448	0.555941
	213.922	-400.03	1.75132			920.308	-158.898	1.30252			1044.83	25.4351	1.45838			1167.29	159.031	0.365156			501.948	173.887	0.27001
	433.378	-30.2841	1.73612			510.224	-99.9012	1.13208			954.903	-201.573	1.22303			1213.52	68.2864	0.342584			439.899	-104.814	1.57675
	493.472	-402.174	1.725			910.158	80.3207	1.22017			391.534	-222.987	1.07743			569.91	169.88	0.356429			691.595	57.3255	0.310192
	433.242	-389.449	1.62321			1223.74	59.4808	1.32419			389.1	-21.6366	1.11475			846.368	52.7109	0.339753			-72.6074	423.52	0.996311
	463.466	-400.056	2.02241			1087.61	-17.0261	1.3199			733.426	-89.2369	1.14214			510.439	13.8073	0.312344			272.053	345.135	1.03634
	213.048	-319.154	1.62232			869.662	166.632	1.29301			1070.25	15.2867	1.27482			1188.5	72.329	0.335031			754.98	432.71	1.05427
	408.049	-429.342	1.52592			1032.44	46.1954	1.28503			780.415	46.5423	1.21287			244.721	75.4122	0.337152			-63.2405	-419.964	1.00808
	721.739	-276.431	1.34887			359.517	52.8463	1.05075			1072.61	-180.675	1.34429			937.326	118.88	0.453554			1124.61	436.815	1.10043
	349.26	-382.129	1.5651			1150.01	265.774	1.44888			556.254	-131.229	1.20346			816.701	98.7537	0.336566			212.865	265.494	1.04263
	411.252	-430.565	2.04083			377.465	-68.2212	1.1015			1067.71	-236.523	1.27739			734.535	-13.7324	0.425387			1228.47	437.968	1.08765
	380.641	-365.489	1.42116			822.198	-175.161	1.38636			233.242	-91.1219	1.02259			814.243	45.3349	0.445738			983.244	435.245	1.05634
	199.809	-17.983	1.99294			798.554	41.3209	1.2556			1071.71	-225.72	1.24457			896.618	118.271	0.393452			70.1644	248.547	1.06666
	118.341	-254.85	1.97929			1107.99	223.889	1.40613			411.961	-169.976	1.04815			1173.79	179.947	0.356387			875.615	434.05	1.05374
	245.605	-355.563	1.66524			835.896	-60.0467	1.29145			1089.1	-274.737	1.36611			588.482	62.7096	0.297905			943.27	434.801	1.08652
	102.779	-303.569	1.80184			538.49	-19.272	1.10529			539.372	-149.866	1.01253			614.87	161.144	0.287493			659.13	370.982	1.06589
	88.5236	-208.531	1.27112			743.107	-21.4729	1.20199			916.304	-236.581	1.58013			891.851	146.516	0.311318			106.14	-432.548	1.0493
	173.933	-338.271	1.69722			935.621	-151.191	1.29146			1078.73	-119.226	1.39716			1173.91	179.342	0.356096			-65.962	-174.892	0.969347
	332.888	-403.371	1.63692			560.97	-74.591	1.11639			954.887	75.2333	1.18782			707.778	162.477	0.317003			576.774	360.827	1.12149
	573.31	-435.398	1.822			581.77	78.9042	1.12315			333.337	248.949	1.12542			942.627	48.737	0.437584			28.3759	-291.25	1.15857
	366.876	-428.629	1.74912			575.697	-60.4394	1.16687			718.48	-93.6991	1.13109			524.207	47.7077	0.351146			389.237	253.958	1.11256
	139.572	-362.119	1.90818			745.879	42.612	1.33592			466.806	8.0035	1.07576			1171.28	181.403	0.43684			-65.6974	-198.72	0.949412
	458.212	-439.25	1.73433			790.751	-38.9572	1.12756			685.483	-157.641	1.31836			1177.89	42.8722	0.427482			214.644	163.793	1.10265
	105.798	-292.591	1.80976			587.402	-31.4203	1.16055			97.2585	0.551095	1.01697			784.102	-14.2528	0.391428			-4.24601	-433.68	1.01709
	565.247	-127.297	1.6651			1170.61	138.528	1.35037			715.545	307.461	1.2764			1015.98	47.0813	0.380031			916.735	434.506	1.03742
	296.425	-417.88	1.90274			766.437	34.4896	1.20721			834.423	-178.235	1.34694			1185.68	123.33	0.358041			936.698	388.425	1.12691
	423.403	-299.421	1.51457			450.026	-60.9006	1.17542			733.798	292.828	1.37558			719.372	67.5917	0.329315			915.321	369.917	1.12207
	404.891	-381.741	1.645			623.193	-8.83313	1.19752			821.916	-92.4271	1.08585			572.215	-124.656	0.36851			16.7042	-62.4204	1.0439
	427.895	-240.993	1.37595			868.759	28.9729	1.2856			490.272	136.031	0.980008			589.506	16.0308	0.387749			30.2746	-368.569	1.08675
	539.2	-33.9661	1.55348			732.163	-98.4196	1.25117			959.754	-141.153	1.36677			913.318	120.631	0.368204			70.7054	-170.294	1.0862
	209.912	-361.686	2.00449			467.145	-54.9602	1.21467			761.922	-86.3286	1.24638			1131.16	156.293	0.286292			53.1447	-316.22	1.08156
	345.925	-93.9543	1.40378			947.811	218.108	1.41208			893.132	-137.598	1.22549			607.826	13.6173	0.429715			79.7066	-394.603	1.10119
	309.337	-317.561	1.66337			848.213	-65.2581	1.30165			883.148	25.257	1.15326			720.22	161.617	0.343762			-55.0966	-335.616	0.965919
	187.148	-58.9943	1.71964			856.274	-28.533	1.38396			124.352	128.302	1.09955			710.999	-186.956	0.317606			175.445	-431.778	1.04097
	258.622	-392.951	1.89429			1126.96	-36.3834	1.4367			984.145	80.838	1.1339			1167.6	114.041	0.322454			935.378	391.051	1.14743
	849.149	-456.022	1.22268			344.009	-55.7882	1.05107			1074.9	-57.7497	1.20329			1015.73	255.744	0.300266			126.044	-278.813	1.10417
	158.739	35.2987	1.73157			473.508	-27.581	1.13137			555.315	-126.137	1.16608			746.33	107.214	0.300622			116.567	-406.134	1.11577
	402.586	-394.841	1.74071			600.503	-22.4409	1.15458			202.378	-113.003	1.04116			1117.43	316.233	0.260871			106.841	-312.904	1.07065
	94.1425	-262.339	1.36932			363.588	41.8373	1.11318			860.996	-59.4904	1.27775			962.076	48.4131	0.325989			515.25	204.354	1.07566
	503.398	-78.0317	1.79513			1130.2	20.5541	1.39958			591.526	-53.3743	1.06741			1156.9	73.336	0.315337			765.323	231.545	1.15736
	260.601	-398.9	1.81456			686.609	-84.6791	1.16349			915.943	235.1	1.35222			1140.38	126.067	0.295744			100.42	-320.932	1.05701
	460.608	-211.038	1.58026			802.193	-3.58745	1.34606			931.991	-256.902	1.27138			984.801	183.139	0.33226			1034.9	280.553	1.20502
	203.151	-389.61	1.72897			922.841	-203.296	1.35434			536.986	221.01	1.02078			676.325	119.761	0.331719			1257.49	295.756	1.16866
	104.4	-302.852	1.87115			882.346	156.01	1.34834			940.185	-159.993	1.3573			996.509	47.8738	0.522412			201.988	37.3362	1.08767
	469.635	-415.336	1.69064			941.217	-247.518	1.32512			1117.65	-194.027	1.41992			529.302	100.961	0.257634			848.728	307.3	1.22606
	514.916	-454.109	1.79015			1153.97	-219.771	1.57707			752.046	-215.106	1.18143			609.647	122.7	0.26799			929.829	305.794	1.22021
	427.869	-413.432	1.87698			781.785	-44.0424	1.17806			328.372	-44.4936	1.10976			786.891	177.848	0.244559			1049.64	335.332	1.26097
	311.11	-391.079	1.70821			814.688	17.649	1.27203			1142.79	-228.308	1.23006			282.461	82.3094	0.237688			168.363	-274.864	1.12017
	145.456	-356.354	1.76246			1161.76	-11.949	1.24973			1017.59	45.1654	1.07566			1140.75	272.624	0.246669			1258.71	186.263	1.25403
	279.325	-301.257	1.48025			894.369	-249.482	1.25306			1036.1	-77.031	1.33366			636.367	154.181	0.250156			561.664	191.096	1.09211
	128.939	-330.654	1.86343			609.614	1.82972	1.23009			1087.61	-3.82872	1.46846			584.338	127.456	0.272023			1258.94	165.73	1.24775
	866.914	-453.648	1.45069			527.181	-34.5728	1.12489			494.799	-78.4773	1.23087			957.676	16.4556	0.453457			346.649	147.51	1.04594
	468.458	-437.67	1.8291			779.484	-66.5599	1.25594			205.75	134.84	1.1187			1149.77	141.523	0.265914			694.951	171.167	1.1069
	210.428	91.6564	1.83833			1011.68	-86.8359	1.33814			836.084	-283.22	1.10919			1099.56	81.5367	0.244976			146.558	-404.295	1.09119
	421.237	-291.888	1.79771			668.515	-84.7544	1.24052			21.7874	16.7031	0.882623			549.076	100.477	0.253351			774.563	201.194	1.18563
	371.872	-345.514	1.64765			805.861	27.2904	1.32706			957.766	-246.629	1.25948			1213.03	90.8422	0.239735			272.664	63.3946	1.04358
	320.052	-55.703	1.8243			1034.86	127.689	1.30443			271.736	45.8693	0.897082			1160.85	76.008	0.344704			209.398	-407.548	1.03618
	350.883	-421.059	1.90277			1029.83	-134.554	1.32198			581.331	-10.7273	1.15907			987.629	49.6062	0.342202			213.373	-363.85	1.08465
	324.242	-411.528	1.7589			742.278	-88.1675	1.24424			682.359	-69.2394	1.11718			692.515	120.773	0.258027			286.103	-430.55	0.991788
	277.511	-301.947	1.54321			1123.23	-63.8963	1.43678			1095.08	-213.621	1.38384			603.945	100.871	0.255042			769.542	169.596	1.16813
	865.596	-453.687	1.36012			509.745	-46.2158	1.12606			978.798	-123.154	1.15357			594.198	75.5098	0.246128			212.549	-385.072	1.03361
	287.697	-392.555	1.71297			1093.03	-197.889	1.41662			1078.92	-96.2745	1.27853			1185.23	89.8751	0.247126			130.999	-387.323	1.12954
	95.2544	-222.048	1.4274			463.423	-92.3085	1.21774			117.816	37.9671	1.07535			414.919	47.2009	0.232922			428.402	148.854	1.09789
	479.598	-437.054	1.73364			414.594	-25.1915	1.12153			96.7554	-33.1354	1.03499			949.045	323.248	0.286782			224.471	-317.66	1.0293
	118.217	-531.756	10.675			1042.25	-2.79229	1.23296			523.975	26.5379	1.05995			1115.02	80.6383	0.254019			258.607	-417.92	1.07144
	307.07	109.596	1.81809			801.902	-25.4853	1.2125			890.572	-139.977	1.26744			912.268	50.1586	0.260673			258.572	-6.86318	1.0719
	229.097	-382.103	1.55592			877.022	22.3744	1.17349			867.425	18.6414	1.15409			1168.99	90.4406	0.253503			557.222	118.313	1.04019
	740.33	-51.0408	1.32077			473.118	50.0258	1.18999			739.066	13.4067	1.16095			1022.41	272.337	0.214516			281.302	3.03283	1.07385
	335.143	27.7252	1.86357			706.163	93.6108	1.19724			1137.2	-171.578	1.14834			1187.45	89.5735	0.223332			270.329	-349.685	1.10508
	209.723	-358.216	1.93941			609.251	20.8129	1.1214			492.077	27.1258	1.0133			1103.87	193.689	0.218529			859.658	176.158	1.15039
	464.636	-399.593	1.80919			779.929	-24.5492	1.17543			590.795	-201.324	1.16617			809.687	113.355	0.279827			233.427	-347.881	1.05713
	189.489	-354.375	1.71213			921.513	277.519	1.33029			1024.87	-162.95	1.39892			1021.82	80.4419	0.295766			718.221	145.474	1.13573
	346.54	-415.448	1.62293			665.971	21.8726	1.19593			871.333	17.6254	1.16149			534.574	12.4335	0.225644			473.129	84.3869	1.12791
	363.732	-409.101	1.70622			658.011	-13.2415	1.16533			716.802	42.1149	1.19366			740.018	69.3739	0.244468			1202.42	138.259	1.20205
	388.347	-442.929	1.88299			747.107	-33.773	1.19972			599.31	55.3937	1.2029			1179.27	76.9494	0.218754			231.997	-396.481	1.09912
	248.368	-416.623	1.90163			420.732	-114.855	1.18251			517.976	-57.668	1.00215			546.893	13.7324	0.245578			411.857	91.371	1.04659
	711.526	-49.4833	1.35296			898.646	-35.4198	1.25249			948.507	19.567	1.24055			227.406	77.8912	0.192481			1071.44	118.289	1.18701
	114.4	-342.116	2.39875			919.294	-1.63902	1.27317			969.402	-206.161	1.18425			770.653	110.324	0.248442			806.832	225.168	1.13963
	50.5831	-286.544	1.26342			1111.23	-61.8563	1.60574			987.463	-136.43	1.44699			758.082	-14.9608	0.201872			428.1	107.731	1.09683
	105.05	-198.68	1.177			1152.3	-15.1541	1.27363			874.284	-29.3871	1.12126			796.13	113.038	0.211533			1252.26	86.9178	1.14407
	297.757	-432.421	1.90512			768.927	20.6132	1.23099			738.468	-57.0396	1.18015			515.613	72.7246	0.202069			289.037	-396.159	0.998317
	653.089	-48.3189	1.41612			793.424	10.1257	1.17703			1132.82	-25.2778	1.17832			430.639	45.5749	0.187012			360.146	-429.727	0.975028
	232.297	-128.793	1.86986			768.241	-49.993	1.26781			1136.63	-233.641	1.42205			1035.12	81.7059	0.201131			239.527	-143.342	0.9986
	153.993	-380.511	1.71942			808.171	-93.0537	1.21156			477.077	50.9667	1.06985			925.299	232.148	0.34369			819.072	157.929	1.13562
	73.1542	-269.172	1.24187			505.884	0.0913581	1.11541			637.426	-15.0368	1.2673			438.767	66.8977	0.177702			1127.74	53.717	1.19554
	384.448	-415.495	1.87767			1102.01	-20.3275	1.21099			1103.83	-79.7557	1.40364			855.305	50.5227	0.222197			1050.85	105.602	1.13975
	652.409	-254.876	1.45989			827.809	208.814	1.3251			691.99	-38.2721	1.23461			701.666	62.8747	0.205481			327.122	-265.809	1.04893
	190.248	-21.8731	2.03474			880.181	214.026	1.21881			588.876	174.272	0.999729			496.352	75.9721	0.194547			252.449	-287.582	1.08113
	298.624	-130.627	1.87081			354.627	-14.1914	1.10698			603.137	224.523	1.12544			591.875	169.938	0.158939			311.132	-397.661	1.14141
	493.052	-121.061	2.04808			999.767	2.65729	1.32209			682.356	-50.1142	1.12295			576.47	101.649	0.173735			1114.34	116.458	1.15913
	233.944	-651.931	5.74469			596.963	-36.6372	1.13802			707.346	-32.1111	1.10167			1192.41	72.6466	0.194155			1153.8	79.268	1.15992
	521.268	-548.641	0.35836			1236.89	-59.5311	1.43243			683.721	-126.481	1.13493			1143.92	34.6234	0.187497			306.711	-430.321	0.940525
	629.649	-261.075	0.371667			415.589	-12.0266	1.07839			1102.41	-24.6574	1.23351			780.075	61.3383	0.169596			271.103	-298.811	1.00418
	575.169	-40.4329	0.248209			846.896	245.049	1.20809			461.505	217.728	1.07413			1213.64	62.3857	0.206874			239.4	-213.017	1.02225
	514.777	-470.495	0.28943			302.039	-89.9573	1.13612			1000.67	-128.473	1.39177			575.681	59.3299	0.158193			341.271	56.9961	1.01409
	400.651	153.208	0.136415			912.316	-35.9438	1.2043			639.913	-60.8324	1.05042			637.592	118.28	0.172877			395.918	39.0888	1.08285
	749.172	221.965	0.0672305			676.061	24.8076	1.20156			274.865	-42.5549	1.05646			1049.24	36.5016	0.173905			275.229	-280.204	1.09143
	814.788	-96.0614	1.72744			597.615	-89.6704	1.23671			769.141	-7.11635	1.2474			460.079	124.849	0.135292			282.352	-258.126	1.11789
	880.995	108.181	1.13812			1129.76	227.084	1.30424			1006.35	-262.07	1.25879			1068.34	81.5067	0.161144			448.776	-411.541	1.03615
	825.287	320.294	1.24447			917.437	16.1332	1.45913			973.192	-190.144	1.42262			1164.22	215.323	0.165622			309.053	-383.345	0.991749
	858.624	-17.3673	1.3678			543.941	-92.8078	1.08832			1080.54	198.595	1.51446			1147.7	183.318	0.140813			299.018	-285.072	1.03583
	134.307	540.335	1.11665			1110.66	-11.1347	1.30474			737.685	16.1177	1.1188			799.792	61.1892	0.146872			485.559	-356.185	1.07056
	-127.415	442.994	1.28663			864.318	5.59611	1.19905			766.597	-124.146	1.20648			1098.67	309.737	0.128391			341.696	-377.539	1.07056
	847.646	149.107	1.09033			294.466	-139.013	1.08469			622.197	-222.75	1.10145			475.17	70.7227	0.123871			309.178	-264.52	0.990418
	625.684	11.6194	1.31582			1108.16	-49.2917	1.3056			761.441	-125.267	1.23926			562.754	60.3915	0.135438			289.959	-269.571	0.996299
	851.608	101.53	1.26842			585.25	3.26184	1.13669			826.585	-252.383	1.05994			1067.14	150.644	0.116447			343.351	-390.335	0.988392
	907.764	-159.275	1.60694			1105.61	1.52497	1.32599			834.393	-285.602	1.18503			870.186	64.7944	0.143578			351.357	-255.251	1.02474
	282.336	-228.527	2.02117			394.48	-44.5726	1.05888			118.845	38.1575	0.984707			1100.71	111.252	0.114194			359.232	-422.551	1.00244
	196.872	-212.545	1.91371			1085.93	69.966	1.39197			696.685	-34.0486	1.12768			1135.31	154.423	0.163565			794.152	138.609	1.12457
	118.213	104.538	1.07236			716.831	-54.1453	1.2163			679.812	-39.3022	1.09879			1170.96	147.037	0.119061			286.105	-208.441	1.05484
	0.398395	0.0916434	1.59482			754.019	-81.9484	1.20423			175.879	23.8411	0.94578			643.163	61.4325	0.105384			289.61	-183.13	1.06365
	858.392	70.249	1.38888			1110.71	106.317	1.23781			1141.18	-7.05517	1.52123			888.777	624.092	0.0567855			338.808	-320.801	1.0829
	168.723	-212.908	1.91241			498.057	-64.9865	1.15758			1093.96	-34.1154	1.54303			498.053	126.287	0.100219			1028.73	84.2875	1.17287
	635.667	-45.804	1.39425			742.115	19.2475	1.17296			888.266	-3.93492	1.22601			1148.3	151.588	0.112504			967.689	79.9684	1.14837
	937.5	-182.374	1.36265			649.828	-53.1054	1.2614			474.031	-247.278	1.012			352.263	51.6861	0.100023			474.11	-389.132	1.08615
	-124.013	520.574	1.33312			623.75	-67.5929	1.18327			658.059	29.9466	1.13367			832.931	60.4992	0.087006			331.309	7.8234	1.02121
	881.896	101.787	1.45414			1199.41	-243.953	1.65537			358.303	37.0476	0.958748			1099.91	40.1948	0.103656			879.824	63.3607	1.13975
	751.4	242.653	1.11293			904.535	-55.211	1.19751			889.455	-21.4299	1.16184			612	60.6405	0.0882148			437.625	-428.867	0.974824
	16.2841	33.0173	1.25821			617.654	-75.8098	1.15148			1066.74	-260.885	1.26534			1052.67	273.479	0.0867463			323.17	-373.896	1.01902
	936.016	90.7971	1.4099			976.144	-17.7616	1.16381			71.9987	46.3124	0.836985			1089.38	150.016	0.0909456			1141.7	188.5	1.48963
	-131.239	355.804	1.17625			1122.7	-7.54726	1.29368			562.449	307.531	1.39034			594.585	58.0752	0.0822657			448.166	-396.969	1.01521
	304.9	-75.7181	1.40958			965.885	182.665	1.39202			306.662	17.1653	1.06801			862.639	84.8215	0.0847242			337.582	-57.2629	1.13145
	754.546	336.257	1.40039			1031.63	-32.9855	1.16602			69.9231	45.3173	0.769456			508.149	127.194	0.0697155			314.752	-277.15	1.05127
	464.952	-68.7672	1.50452			974.162	-48.189	1.32072			645.23	-63.9452	1.08636			824.986	93.1547	0.0827243			601.704	58.2141	1.08641
	316.805	-58.5852	1.41274			993.973	-28.8449	1.23462			740.729	-194.277	1.17077			381.334	54.8159	0.0695028			1175.21	13.1656	1.23176
	119.233	-58.3015	1.72871			835.946	-51.7676	1.34663			1112.76	22.3232	1.39086			527.414	129.769	0.0731268			419.174	-423.282	1.03147
	435.272	-68.1633	1.85296			891.316	136.105	1.26526			349.68	-76.874	1.03428			760.061	89.8316	0.0816755			432.742	-376.8	1.03685
	791.067	28.2311	1.05813			722.463	-74.321	1.30437			868.624	11.7415	1.19282			1118.86	179.204	0.0773405			355.431	-301.649	1.02939
	-116.176	551.319	1.22184			795.006	138.322	1.22559			1049.67	-39.3375	1.22321			1096.37	280.37	0.075151			408.217	-424.232	0.990079
	384.439	200.98	1.33441			751.469	-127.158	1.21862			952.051	-251.202	1.2937			552.931	129.029	0.0685125			636.301	-426.661	1.00096
	160.485	419.647	1.05252			734.478	-47.365	1.35014			681.304	-47.4958	1.16957			1016.98	183.649	0.0714028			549.607	-427.623	0.999623
	-126.072	473.627	1.21987			667.36	71.9434	1.18138			657.49	17.428	1.08123			1113.48	153.76	0.0794251			400.569	-2.09911	1.05177
	543.625	450.711	0.998045			522.303	-33.5113	1.28789			1113.3	-191.332	1.38922			772.23	89.7919	0.0835319			1257.39	36.0207	1.20349
	782.56	24.7535	1.44214			413.032	-174.133	1.40675			607.824	-2.42273	1.24339			1094.25	125.075	0.0662483			393.303	-31.9086	1.03774
	740.934	214.107	1.33868			339.351	25.4044	1.42375			722.466	-15.197	1.22903			1204.55	40.2111	0.0810721			270.663	-230.442	1.06548
	32.4718	185.569	1.16428			108.714	193.697	1.33041			968.355	-205.565	1.22057			838.438	89.6267	0.0686561			395.814	-262.824	1.00141
	37.6626	57.9427	1.75842			586.724	-159.193	1.24939			893.307	-16.5581	1.08155			1143.62	129.967	0.0572743			566.139	-427.44	1.08742
	209.851	-84.8789	1.6703			187.93	110.974	1.37249			569.674	-22.3482	1.0166			804.911	91.3266	0.0526363			1236.73	11.7186	1.1892
	-1.69655	46.2671	1.48954			16.5723	33.0107	1.54299			1116.83	-66.6489	1.22063			987.342	382.896	0.621764			550.734	67.7926	1.05025
	-116.329	551.326	1.21725			301.346	34.1535	1.3353			980.534	-128.539	1.38079			548.4	336.683	0.643194			386.605	-424.656	0.951784
	653.322	-17.5073	1.46553			101.422	26.0003	1.3486			904.938	-233.633	1.23708			1002.97	366.589	0.592991			340.665	-266.359	1.03289
	581.132	-209.289	1.82533			818.094	-4.8644	1.24294			453.938	-163.572	1.05389			1003.98	239.423	0.685596			673.214	47.1684	1.1016
	869.55	375.605	1.63371			354.791	19.3592	1.40191			759.026	-273.74	1.18052			1003.18	-236.804	0.665442			346.784	-324.569	0.997243
	717.542	277.817	1.37395			847.455	-113.589	1.20836			733.735	-1.00969	1.14896			560.532	433.963	0.616261			469.963	-428.508	0.969177
	458.044	508.72	0.966521			210.664	-135.087	1.42246			873.819	230.063	1.4812			779.293	411.476	0.642551			1064.72	36.8482	1.16757
	437.663	-195.829	1.80371			138.3	97.9522	1.32212			1024.66	-255.126	1.34373			468.001	263.016	0.66585			371.748	-70.7884	1.0516
	-129.421	397.245	1.24716			351.633	223.95	1.4122			458.556	19.4126	1.09005			1062.1	183.862	0.656672			460.2	-415.578	1.00404
	584.22	280.937	1.35284			637.969	177.636	1.21163			791.669	-240.379	1.1482			994.559	285.762	0.610668			491.613	-19.2342	1.08198
	393.7	-67.1351	1.39369			279.888	8.71266	1.46893			899.171	20.6558	1.07891			603.367	222.712	0.763367			1221.09	0.873406	1.13479
	193.18	-90.3578	1.54602			355.806	165.247	1.32745			1023.67	-254.155	1.34768			592.432	304.664	0.61653			998.031	185.957	1.4509
	471.094	-34.1661	1.53178			328.186	26.3462	1.44548			765.386	-79.0194	1.3371			70.4176	382.298	0.839039			562.705	-354.289	1.05837
	493.638	11.9466	1.28543			71.6537	21.5578	1.53927			838.79	-24.4459	1.26022			288.478	375.221	0.731882			1203.66	32.6718	1.16932
	353.183	-115.408	1.54513			243.903	-127.547	1.49583			993.775	-211.28	1.16508			436.626	190.118	0.675438			395.438	-324.124	1.06917
	256.355	289.724	1.04468			567.336	20.6277	1.30768			972.867	-190.686	1.44243			595.265	59.5819	0.895399			426.627	-90.6472	1.10176
	493.684	13.0236	1.30167			16.1275	-40.46	1.66774			984.006	-72.3501	1.16696			563.696	431.603	0.59622			477.443	-355.997	1.06937
	365.423	-46.6276	1.84258			248.556	-181.644	1.39352			949.683	18.7141	1.1857			525.641	125.919	0.794959			1084.81	-1.1281	1.20837
	626.541	-47.3367	1.75482			126.526	188.961	1.55207			432.338	-28.4012	1.1139			304.058	323.921	0.678811			941.261	47.0349	1.12767
	772.007	-10.7003	1.39509			221.939	76.3383	1.40437			966.35	-86.8753	1.30654			620.481	257.452	0.607554			480.625	-8.35152	1.07654
	600.873	-58.8272	1.45067			177.031	-59.6496	1.73987			560.805	-166.615	1.14936			856.416	391.075	0.621228			813.02	38.0853	1.14924
	-13.9642	175.561	2.12451			267.643	31.2373	1.46042			860.175	-62.966	1.219			985.421	384.393	0.569575			328.354	-402.282	0.999386
	404.132	-34.3396	1.55225			590.862	139.275	1.37189			1087.79	-160.374	1.32975			330.246	104.361	0.770249			405.547	-329.531	1.03902
	259.673	3.06088	1.5469			419.05	9.08246	1.25561			867.572	-240.12	1.10885			351.359	365.204	0.691823			530.276	-405.374	1.03911
	472.685	70.3296	1.22502			296.39	6.31959	1.4439			977.026	-270.965	1.23163			448.104	250.977	0.604244			467.83	-240.767	1.0819
	953.214	129.164	1.32429			214.556	115.456	1.37225			520.162	-7.188	1.0328			74.3298	366.896	0.733011			378.388	-299.369	0.994311
	168.837	-84.9772	1.74798			769.738	147.184	1.25431			903.489	-203.144	1.06508			545.065	122.54	0.795583			465.948	-229.326	1.00897
	378.212	173.275	1.13422			62.8971	-81.2685	1.50267			1033.8	-198.119	1.17207			304.475	-359.752	0.774334			416.065	-75.5226	1.07274
	839.294	-32.1196	1.49216			581.013	164.785	1.26222			454.711	-49.2468	1.06224			806.863	389.522	0.575593			602.063	-326.335	1.10964
	497.417	131.524	1.28014			517.869	-172.906	1.32521			455.373	-3.53449	1.05657			731.285	370.923	0.573482			620.567	-403.869	1.12418
	740.8	249.102	1.16408			552.085	-110.093	1.30064			1095.87	-61.6583	1.13454			664.082	369.96	0.560756			1136.69	60.7598	1.1328
	189.42	-9.51847	1.76186			98.971	47.4348	1.31994			846.791	-75.7985	1.05652			924.536	127.223	0.644947			444.935	-326.802	1.01987
	630.174	223.982	1.23568			159.896	-66.802	1.63008			485.445	-164.202	1.23506			993.846	108.533	0.56443			414.966	-298.219	1.0106
	162.946	236.717	1.09885			543.819	-0.515185	1.27122			846.207	-13.2294	1.48151			308.585	367.011	0.671861			511.286	-328.519	1.10808
	314.939	-103.192	1.94576			231.466	29.8927	1.45278			598.531	53.3833	1.08848			783.691	304.069	0.598963			640.564	24.8365	1.08558
	440.749	273.393	1.41024			418.569	32.8069	1.31268			386.022	-20.872	1.14509			928.637	295.598	0.601813			501.171	-251.46	1.16173
	414.446	96.0206	1.61144			139.134	-59.3281	1.46975			927.783	-214.467	1.11788			927.121	126.808	0.593746			1217.73	72.2324	1.11646
	370.233	-12.2814	1.47226			147.826	-144.058	1.37877			607.426	-46.0499	1.02905			663.813	360.817	0.518399			684.978	-394.612	1.11635
	455.773	-7.70741	1.51355			76.5503	6.89622	1.46736			1146.71	-0.380001	1.18094			409.856	-122.096	0.740299			1086.55	17.2504	1.17679
	408.696	-35.796	1.31823			253.328	61.2637	1.29241			1057.12	-215.526	1.27892			332.316	52.7259	0.73786			372.629	-324.759	1.03257
	336.013	-66.6384	1.57177			352.597	-180.678	1.30795			889.278	50.431	1.21323			448.524	-336.663	0.732622			1195.58	96.674	1.69577
	547.648	11.6401	1.53182			307.811	93.6832	1.50951			1096.91	-251.859	1.27809			286.177	45.6195	0.789839			534.568	-337.929	0.998261
	489.53	-24.6786	1.40728			602.908	-152.415	1.28013			1099.21	-64.7997	1.25701			765.006	222.738	0.598766			655.618	-261.843	1.06464
	868.488	374.361	1.49841			253.866	-109.464	1.39545			952.557	78.4112	1.20575			720.243	115.217	0.62001			559.3	-382.303	1.04513
	521.59	-30.7019	1.3855			211.17	185.412	1.4508			1145.15	-290.005	1.29024			319.754	358.234	0.604872			491.262	-332.084	1.13567
	168.659	-236.619	2.18761			465.366	-152.433	1.32001			773.613	-72.5795	1.15174			127.789	-101.375	0.791785			363.756	143.349	1.46384
	496.454	-43.7843	1.34423			143.238	23.2861	1.32698			1114.68	-48.3702	1.04615			831.491	106.136	0.634837			1231.67	-58.2258	1.25273
	365.142	272.713	1.30363			160.921	13.5545	1.41428			347.751	251.586	0.895884			396.35	-208.223	0.709037			536.867	-420.343	0.980264
	353.798	-159.216	1.88176			298.378	136.728	1.48873			911.554	-261.388	1.1641			241.1	353.18	0.605979			408.223	-227.409	1.00431
	116.809	33.9433	1.46517			255.218	215.858	1.31967			828.248	-40.461	1.0953			337.252	354.813	0.602938			400.098	-336.222	1.0044
	-20.6355	88.9154	1.23573			666.053	-100.718	1.24843			465.911	32.9998	1.01962			521.727	237.176	0.678973			603.425	111.44	1.34344
	528.456	147.781	1.30271			377.862	-136.565	1.43253			847.979	-78.4913	1.17589			696.789	244.114	0.56145			451.69	-275.612	1.02467
	160.165	108.025	1.48322			346.694	52.8356	1.24002			832.268	-43.4555	1.35351			64.1753	409.705	0.673951			987.558	2.18821	1.11815
	232.85	-191.818	2.31655			148.62	-115.062	1.57807			383.065	-20.0059	1.05036			719.701	206.433	0.639842			1162.33	-20.0304	1.12925
	352.646	-154.616	2.02594			262.595	-103.828	1.40531			975.135	-266.724	1.39679			263.886	377.897	0.573615			440.337	114.662	1.35606
	327.375	-14.2247	1.26359			57.1029	-11.9459	1.55804			643.663	-107.577	1.06295			339.163	370.404	0.544489			539.626	108.194	1.40202
	686.049	347.624	1.21369			135.731	-118	1.52248			928.444	-218.487	1.10081			753.052	231.317	0.548934			913.081	-18.006	1.16268
	706.254	42.6155	1.33958			78.1215	165.991	1.52631			793.539	-159.953	1.20448			676.752	308.507	0.661872			1234.51	-4.24495	1.16346
	443.297	47.5922	1.38164			377.607	-96.5078	1.44285			994.384	-175.119	1.40308			832.776	98.1	0.641812			436.522	-270.612	0.984602
	725.489	359.266	1.61804			793.018	-45.104	1.22633			272.684	-43.9714	1.08155			775.747	364.928	0.51488			463.611	-287.661	1.08523
	3.64816	-29.408	1.18265			843.466	-69.909	1.24607			1059.16	73.196	1.37352			826.723	100.248	0.590734			336.956	-161.746	1.0195
	290.473	109.862	1.33683			908.496	-119.37	1.28318			722.104	-11.8285	1.01172			215.764	306.09	0.616701			1260.78	-0.341959	1.21096
	553.52	79.5861	1.29396			313.874	-105.869	1.37247			1132.43	-31.2086	1.24654			528.826	-16.2501	0.71215			577.404	-427.315	0.990967
	673.864	41.6896	1.19838			167.343	49.4249	1.44332			1037.32	-95.3549	1.18343			280.995	-331.248	0.716637			346.648	-70.5561	1.08792
	327.73	-22.3941	1.6783			202.631	-66.0767	1.36375			919.929	-168.008	1.26375			700.278	243.141	0.555978			637.204	-87.6487	1.07602
	93.2187	20.4107	1.35616			311.171	149.618	1.57998			1025.57	-11.0773	1.23523			410.214	-123.737	0.631617			507.237	-88.002	1.0786
	182.287	8.43426	1.41497			88.4822	-128.789	1.54504			66.8404	73.4591	1.13511			537.812	-13.2831	0.642523			930.133	28.6832	1.14449
	905.44	92.9076	1.72709			295.997	-105.611	1.42558			591.194	-55.0867	1.06834			983.423	57.5439	0.60371			1261.48	-63.4751	1.13706
	325.988	50.4702	1.55528			290.672	-121.441	1.37721			625.244	-77.7435	1.21907			438.735	-171.293	0.654194			643.486	-322.759	1.05999
	690.699	373.408	1.20453			342.382	-212.498	1.34488			973.266	-266.579	1.37125			595.479	13.4086	0.627337			1066.64	-185.396	1.14164
	163.382	-31.691	1.55145			405.101	-184.382	1.3769			1041.62	75.3645	1.35757			772.661	298.402	0.518423			467.751	-327.411	1.00821
	526.395	145.638	1.30664			362.719	-24.9423	1.29638			770.62	-14.475	1.16025			720.126	114.527	0.531924			450.402	-178.837	1.03392
	620.697	-49.0333	1.57801			389.87	-133.459	1.40398			1057.44	364.108	0.9852			680.629	362.107	0.490029			567.132	11.4603	1.07523
	-12.7426	299.787	1.01526			225.159	-4.20666	1.35397			83.6121	59.3231	0.763025			222.184	326.797	0.539504			507.377	-339.704	0.979603
	15.4885	100.29	1.09104			391.166	-159.323	1.32987			875.969	-47.815	1.11208			264.94	-307.622	0.681239			494.294	-225.067	0.997328
	159.924	-215.886	2.11673			620.266	-132.611	1.32198			692.687	158.007	1.36175			124.231	31.2075	0.713298			409.499	-124.684	1.02515
	482.315	112.108	1.35443			80.3973	-78.8746	1.47894			770.218	-12.6607	0.947136			711.242	239.182	0.526702			567.482	-64.5205	1.07856
	630.478	222.98	1.29692			783.683	-62.1371	1.20853			707.836	3.03538	1.0544			458.161	-13.5767	0.600267			560.848	-101.514	1.10902
	647.878	210.102	1.12073			212.012	7.79115	1.43644			1003.18	-231.801	1.15261			172.26	-182.2	0.770144			524.015	-246.616	1.0778
	142.131	22.6501	1.46148			300.135	-212.635	1.83991			430.602	-28.1207	1.01765			357.977	-172.68	0.618238			594.538	-390.668	1.13626
	675.447	13.6563	1.57899			800.298	-102.924	1.24395			1000.15	342.934	1.36893			227.936	293.795	0.540889			504.826	-65.1143	1.0603
	-28.0196	453.816	1.18916			400.895	-84.4139	1.25378			612.327	-121.239	1.25267			126.709	33.8385	0.709059			622.323	-399.35	1.16297
	-114.075	533.357	1.12093			110.109	-34.0168	1.41628			646.832	-1.31061	1.03102			470.582	354.175	0.974118			1006.67	48.2564	1.09237
	293.433	174.545	1.51007			83.6801	-68.087	1.49741			992.086	-271.071	1.28237			55.4954	82.1624	0.739025			595.192	-278.419	1.0286
	680.946	63.7115	1.3006			210.033	-103.517	1.53189			822.533	-53.114	1.17565			163.899	-187.791	0.69983			432.08	-59.1937	1.04107
	629.25	181.373	1.15402			674.864	-15.3188	1.26597			797.846	-277.179	1.2376			249.474	371.814	0.517345			1261.82	-94.1642	1.2432
	132.174	-232.291	2.49766			172.454	-7.80084	1.37445			472.739	-28.215	0.968918			125.117	32.3894	0.680792			588.699	-185.01	1.02021
	238.457	-47.7675	1.65442			102.998	-50.0373	1.50981			93.8665	62.9289	0.804279			528.808	333.472	0.458586			459.114	-359.937	0.972335
	557.422	144.12	1.40469			608.145	-100.909	1.32732			653.574	-168.286	1.2383			309.683	51.2438	0.650219			858.692	16.5241	1.13143
	761.638	28.0572	1.47155			220.179	-68.2038	1.4466			379.349	-4.44796	0.980715			351.926	-171.906	0.630402			737.397	-212.178	1.21539
	312.298	165.137	1.68829			109.378	-60.5026	1.58121			1115.01	71.1364	1.276			504.592	-118.455	0.628631			654.981	-426.453	1.00093
	365.571	-249.815	2.02949			562.991	45.707	1.24539			1101.19	132.156	1.30791			369.875	-166.826	0.618761			765.872	48.5894	1.08517
	-79.9787	549.732	1.05658			117.052	-101.724	1.44772			837.951	-42.6827	1.20172			724.672	234.526	0.493894			928.562	-20.8393	1.11012
	369.815	191.177	1.16178			251.69	90.4703	1.37794			486.344	-163.58	1.08217			101.949	33.5664	0.610222			905.597	53.2543	1.05958
	346.563	-67.4134	1.71428			328.213	-90.697	1.37243			1047.86	-123.275	1.35946			816.027	111.587	0.550832			351.83	-120.114	1.04688
	392.98	205.023	1.56025			534.756	-120.419	1.23675			373.087	-148.449	1.04775			128.769	31.6853	0.702316			470.166	86.4452	1.39886
	609.955	71.2598	1.47318			711.224	-64.5683	1.2365			1122.93	-250.036	1.21709			605.052	211.759	0.484075			442.256	-259.424	0.9707
	353.36	-25.8542	1.37142			107.023	-92.4229	1.47775			398.553	50.7393	1.06747			638.35	189.875	0.533871			703.331	-165.878	1.08901
	381.62	115.087	1.56567			200.692	-49.4335	1.44985			367.343	-30.1376	0.92786			836.747	102.68	0.475436			275.925	-122.878	1.20224
	717.72	68.1106	1.40102			418.011	-40.8933	1.36098			343.542	-37.4424	1.02731			504.781	-117.669	0.555277			383.751	-337.475	0.981975
	605.753	111.791	1.45193			315.937	-166.232	1.40384			676.739	-87.752	1.0747			107.918	28.5428	0.722605			667.281	-102.801	1.0639
	600.062	200.933	1.14424			662.099	-38.4846	1.35913			89.7769	69.6921	0.76644			514.847	210.382	0.508837			572.33	-39.6731	1.04821
	209.045	-46.736	1.57557			234.854	-120.951	1.44574			1132.77	-25.475	1.17201			220.605	350.902	0.479818			298.856	-103.443	1.27157
	596.543	-55.7876	1.35737			697.414	-87.2891	1.23686			1019.93	-174.021	1.32246			474.677	-4.68509	0.543037			612.859	-257.462	1.08891
	239.381	-33.3141	1.52776			231.695	-20.9285	1.40152			546.83	126.237	1.1576			696.924	182.788	0.473512			552.836	-78.197	1.06152
	608.437	147.218	1.21961			435.322	-163.198	1.3101			381.767	-55.3589	0.978403			231.302	371.021	0.389729			763.299	-373.045	1.19321
	555.768	143.1	1.37343			189.497	-21.1295	1.36166			862.557	-203.395	1.14016			978.063	28.1912	0.455454			1089.74	-206.477	1.16052
	372.635	-12.5919	1.42655			268.591	-165.7	1.50069			531.005	7.9724	0.917482			223.532	94.8316	0.580722			690.457	-124.307	1.10682
	731.816	164.251	1.39864			197.948	16.3061	1.38298			1142.46	-3.22955	1.46622			948.746	319.934	0.383058			683.586	-189.156	1.06612
	316.946	-11.6053	1.55591			868.634	-98.5602	1.22038			463.187	-33.9227	0.994417			781.907	403.209	0.455712			505.437	-299.748	0.968839
	223.799	247.729	1.48331			459.297	-68.9739	1.362			496.936	-28.7775	0.976331			959.613	406.174	0.338512			919.698	163.84	1.46557
	692.358	86.2251	1.53375			603.63	-27.7129	1.24119			1135.62	-54.9039	1.00977			501.832	222.615	0.429965			469.46	-82.8321	1.09773
	476.39	324.504	1.4285			437.641	-36.1291	1.24962			983.413	-134.879	1.33935			783.151	412.847	0.449555			792.598	36.2165	1.13604
	62.7021	41.4959	1.61082			93.8493	-0.62314	1.29353			780.713	13.6873	1.26438			516.329	171.855	0.508378			1246.66	-205.31	1.289
	576.214	105.081	1.27424			411.938	-115.039	1.38917			1003.63	-25.3681	1.2034			993.849	424.674	0.352452			1140.79	-165.658	1.11984
	512.192	76.2235	1.29576			187.007	-95.6014	1.39267			1138.28	-105.361	1.26227			461.843	-15.8163	0.501803			577.36	-90.7064	1.05098
	270.961	95.7414	1.64344			265.748	-62.3246	1.39335			957.313	-291.186	1.14343			352.927	320.606	0.461641			598.379	-234.224	1.02825
	107.126	-222.451	2.05184			113.656	-72.4278	1.53696			1019.07	-25.6788	1.18129			668.186	195.743	0.407515			666.609	-293.246	1.10534
	477.635	103.707	1.21761			531.019	-149.668	1.25925			1138.48	-15.66	1.26521			995.317	395.133	0.376111			1169.55	-85.7053	1.12363
	25.8081	-29.1426	1.72066			541.231	-27.1219	1.30929			1067.22	-48.075	1.36665			63.7891	29.3758	0.580224			975.879	5.65775	1.09862
	149.605	21.6017	1.58174			111.954	-17.4015	1.33113			93.1612	71.0099	0.799788			63.1213	31.2233	0.584071			500.041	-41.5449	1.00414
	206.457	209.512	1.59231			773.071	-71.9915	1.26121			952.238	49.1895	1.13605			659.555	202.384	0.409805			469.705	-145.223	1.10199
	71.1186	46.0025	1.77003			694.752	-69.2174	1.29982			424.717	-63.2167	0.997221			951.786	129.471	0.388718			985.093	-65.5803	1.11422
	689.48	201.417	1.07239			175.732	-42.4274	1.46191			462.285	-35.2186	0.947873			822.889	221.399	0.376807			-33.1182	418.418	0.733859
	415.096	-45.828	1.56478			127.784	-124.104	1.40212			566.177	-27.8756	1.14148			986.788	111.141	0.32604			374.834	67.0924	1.27893
	522.588	-10.6914	1.38273			245.077	-67.5621	1.40067			964.824	-18.7463	1.16885			153.744	76.4023	0.67538			1263.48	-243.042	1.25308
	684.323	81.7008	1.42893			266.947	-51.1728	1.43736			899.895	63.7414	1.29868			839.413	-82.259	0.40894			1064.83	-172.099	1.10794
	582.574	-43.7471	1.60787			232.739	80.3498	1.59091			631.297	-17.7986	1.19363			1054.69	52.8808	0.371932			622.262	82.3268	1.35419
	247.118	19.1413	1.34787			413.87	-57.654	1.3253			772.032	-20.3049	1.18383			84.0174	54.0359	0.58016			851.666	-183.871	1.13191
	235.325	106.39	1.42057			319.836	-128.848	1.41842			623.423	-34.014	1.02346			813.326	250.83	0.325883			894.782	-149.736	1.24236
	291	93.6375	1.42723			260.045	-191.661	1.79184			1069.45	-174.564	1.27663			65.4029	39.7482	0.489512			422.903	58.7526	1.317
	427.179	-20.6071	1.58961			201.304	-106.53	1.44215			371.63	-149.054	0.976954			966.641	76.5489	0.344329			1263.04	-203.571	1.1661
	339.874	116.864	1.43485			592.174	-42.8135	1.23132			607.787	-48.4843	1.05963			9.9122	39.7713	0.555949			504.637	-141.869	0.988235
	385.313	87.4857	1.37987			194.561	26.498	1.41476			909.215	8.39452	1.24244			1037.59	202.523	0.314859			639.84	-114.319	1.13902
	392.139	230.407	1.41697			607.389	-11.7481	1.30423			875.755	-202.837	1.12212			261.72	27.5862	0.428645			700.614	-362.29	1.06998
	104.89	-35.9917	1.61534			264.429	-130.512	1.43708			1051.4	-70.0092	1.28586			968.07	96.2954	0.251337			465.514	-332.764	1.03302
	564.903	197.849	1.47804			161.913	-106.264	1.49317			816.581	-86.4523	1.02964			880.315	196.044	0.217944			1090.5	-217.371	1.20129
	529.092	50.4453	1.40965			481.02	-104.833	1.24576			770.482	-35.2388	1.00006			730.568	134.016	0.21165			813.127	-19.184	1.12324
	429.794	108.229	1.5272			300.133	-76.3742	1.35713			971.317	-21.004	1.14335			689.206	130.56	0.226235			661.226	85.2597	1.43292
	637.706	339.048	1.24521			796.127	158.655	1.20171			1129.18	-190.556	1.28971			645.682	131.932	0.225033			1177.33	-148.242	1.14763
	460.864	325.072	1.31569			47.2133	-33.4518	1.69658			1039.23	44.9698	1.42302			608.021	138.22	0.225746			699.082	-225.833	1.13372
	-0.514894	88.4655	1.27078			221.038	-95.8353	1.43599			505.38	86.2384	1.02897			658.12	122.931	0.192317			719.946	-389.719	1.13775
	695.331	15.458	1.29066			724.728	-107.463	1.19507			1027.59	15.9497	1.28735			619.354	130.332	0.19965			1248.95	-62.9552	1.18502
	340.018	-71.7548	1.62865			86.5919	175.822	1.57038			972.135	323.463	1.24108			673.091	131.453	0.221799			835.068	-418.062	1.11505
	893.092	-41.6586	1.41755			581.088	-117.226	1.31155			708.389	-6.71328	1.10253			855.69	230.757	0.195627			1242.62	151.3	1.57133
	216.349	68.846	1.76304			140.802	-88.2172	1.4784			976.48	2.06178	1.1723			143.921	352.699	0.136362			563.577	-123.427	1.0865
	252.335	134.79	1.20906			471.262	-58.5127	1.38563			628.53	-38.4558	0.944519			119.702	332.902	0.118231			444.365	-139.245	0.989803
	555.222	-119.141	1.539			862.884	10.5173	1.43261			708.311	-1.26258	1.15792			135.19	111.355	0.0652248			899.378	-72.2095	1.13525
	-3.12078	155.315	1.37887			474.906	-5.07813	1.28722			977.773	20.6396	1.18189			1104.37	-289.345	0.424772			554.864	-240.984	1.10832
	332.454	-7.1394	1.63337			133.002	-22.5077	1.49193			755.175	-53.1627	1.07129			533.517	-336.914	0.444542			1214.2	-159.851	1.16486
	88.6149	-32.7596	1.78531			67.5677	-34.8687	1.56623			546.479	-41.4756	0.909321			265.809	-204.909	0.594287			699.62	-122.312	1.16039
	187.281	13.4683	1.45833			363.404	-35.806	1.37532			718.276	-71.0208	1.01208			-12.611	-243.845	0.638429			848.429	-49.5639	1.16044
	437.521	195.963	1.44283			637.966	-121.927	1.26069			890.463	-235.251	0.989323			280.668	-224.398	0.550161			1012.22	-80.6321	1.13001
	651.703	62.1421	1.49077			710.218	-125.749	1.28499			845.787	20.4571	0.932915			672.649	-232.958	0.448908			867.388	-424.094	1.18694
	164.466	-29.9829	1.39058			282.469	-66.32	1.43391			806.211	105.107	0.982711			753.629	-272.853	0.488927			737.555	-331.462	1.04709
	402.278	297.396	1.56001			655.836	-59.2233	1.2266			1078.33	334.862	0.236409			650.09	-227.056	0.459403			672.135	-90.8461	1.12984
	493.336	328.437	1.28149			502.716	-126.155	1.29257			430.676	254.805	0.236481			492.484	230.551	0.536262			1224.68	-211.132	1.15978
	489.316	283.976	1.428			600.433	-113.324	1.36321			348.176	475.723	0.0818666			87.5625	-43.7807	0.68396			1232.35	-148.365	1.13169
	140.01	87.287	1.80573			592.524	-57.4453	1.27276			339.395	-31.2905	1.15403			688.039	-260.199	0.453293			807.187	-334.889	1.18178
	259.687	270.706	1.57391			554.128	-30.2269	1.18665			567.768	-111.101	1.14406			1002.27	277.099	0.418476			518.296	-165.673	1.03567
	626.333	8.49604	1.58211			175.802	-120.855	1.56296			310.088	-22.5004	1.18885			609.307	-115.395	0.52668			995.436	-193.892	1.14162
	257.441	-10.3062	1.51031			304.464	-147.242	1.38667			290.284	-160.686	1.46185			-18.8331	-291.871	0.557239			634.448	-345.061	1.04439
	-17.4128	522.016	1.18938			8.73941	-18.654	1.69038			1135.65	-228.134	1.22713			568.026	-332.45	0.385372			374.516	-121.879	1.07975
	327.166	-36.9934	1.59412			460.213	-121.525	1.24617			239.849	6.84804	1.03207			146.315	-85.82	0.538739			804.289	-185.809	1.04602
	587.601	41.4835	1.47924			275.532	-24.7151	1.37026			1060.79	-164.399	1.61597			535.011	221.887	0.832505			880.809	-40.0997	1.17538
	562.256	329.591	1.41846			462.098	-45.9547	1.34385			526.608	-145.62	1.24899			986.632	47.6292	0.435347			685.163	83.4044	1.42638
	560.333	39.281	1.46656			244.189	-48.4659	1.23958			1149.95	-171.269	1.43891			754.552	-259.909	0.472836			717.937	-267.679	1.12408
	165.642	-238.162	2.37546			42.6481	-22.7985	1.57544			406.266	-53.6553	1.21471			132.19	28.4678	0.622947			896.311	-41.2387	1.07024
	443.215	280.754	1.38616			476.032	-36.2728	1.30427			1148.45	-215.246	1.30475			350.638	-99.8154	0.458453			1167.6	-191.978	1.20817
	65.2561	251.99	1.66764			451.462	-82.3426	1.25108			180.604	-55.2552	1.05151			639.62	-222.566	0.495245			1214.69	-114.889	1.1967
	344.594	204.941	1.56826			736.041	-32.3704	1.17397			781.706	-116.401	1.34753			857.325	427.498	0.386033			589.616	-353.24	1.03721
	174.65	51.8084	1.54529			940.674	-92.5104	1.10929			1078.61	-163.955	1.38069			669.121	-136.905	0.464019			575.805	-328.649	1.02936
	781.709	164.258	1.41093			631.499	-80.9675	1.24517			573.746	304.366	1.10444			906.48	-95.0545	0.407403			912.798	-31.134	1.06722
	681.455	-35.5511	1.48513			101.138	65.116	1.5129			101.29	86.7376	0.967062			972.737	-89.2614	0.383239			611.782	-63.0285	1.04702
	165.865	491.619	1.10776			220.44	-52.716	1.38143			1008.02	-110.81	1.34339			816.774	-61.9465	0.418109			1011.1	226.246	2.15903
	174.789	252.387	1.82981			148.268	14.0858	1.28618			927.025	-168.906	1.18581			809.556	-135.693	0.388246			684.913	-366.65	1.03964
	136.883	191.578	1.78411			681.685	-88.8308	1.30898			1017.13	-409.021	1.57479			197.186	-147.889	0.398327			1044.55	-194.275	1.16165
	787.313	-82.5458	1.41606			640.717	-55.0812	1.19423			1250.48	-196.232	1.4027			271.732	-92.6123	0.511083			519.62	-43.4107	1.0082
	626.965	-176.028	1.44513			126.966	26.6973	1.27152			368.146	-32.9203	1.20191			876.51	455.386	0.365028			679.498	-169.161	1.07786
	600.875	112.091	1.21398			892.327	-81.884	1.27811			948.311	-107.699	1.82507			616.705	26.3558	0.44415			718.652	-66.382	1.15033
	463.134	76.0846	1.34605			93.5111	-24.1194	1.31395			1250.47	-194.956	1.34117			258.522	-181.873	0.41903			736.087	-322.554	1.09596
	304.415	88.9822	1.41744			652.33	-69.8625	1.20452			435.999	111.283	1.19334			859.513	-127.073	0.376705			650.741	-251.861	1.02158
	623.759	89.7708	1.49058			531.47	-84.8485	1.4135			1209.11	-147.279	1.47017			842.717	424.966	0.376495			811.445	-256.005	1.14211
	45.1383	185.669	1.58567			782.152	-109.365	1.18726			977.372	-122.472	1.47974			0.393048	23.9874	0.550917			583.429	-173.659	1.08292
	37.0961	200.449	1.95191			368.784	2.58208	1.43793			421.715	-83.6174	1.10695			376.488	-84.5775	0.407458			696.333	-413.558	1.02933
	305.281	165.884	1.53918			427.349	-104.404	1.44712			1017.7	-245.982	1.52651			744.608	-14.144	0.418678			618.954	-129.817	1.05746
	76.152	116.047	1.76053			757.783	-87.2778	1.13193			711.065	-173.303	1.36313			427.374	294.037	0.440965			1142.09	-91.7196	1.19099
	729.042	22.0564	1.33828			244.694	-34.5215	1.40646			884.655	-51.3092	1.30094			671.55	310.055	0.379282			756.859	-328.316	1.1245
	647.877	80.2461	1.44626			391.917	-192.972	1.32962			580.911	132.685	1.11074			1057.2	296.556	0.324969			1182.5	-218.02	1.14294
	250.432	160.053	1.3169			285.189	-89.029	1.51278			405.401	-85.1412	1.0204			1125.75	76.0924	0.325976			387.249	95.981	1.41631
	427.224	104.748	1.47894			308.553	-122.183	1.4331			591.201	172.022	1.1984			776.427	-35.6991	0.433762			780.204	-152.385	1.07854
	728.454	356.502	1.49622			309.564	-65.8039	1.37148			1163.55	-122.137	1.59069			418.117	-20.0625	0.400353			1165.03	-134.483	1.11296
	295.289	248.71	1.44385			412.593	-151.125	1.32536			933.978	-124.586	1.47131			510.363	404.983	0.368542			607.157	-53.5363	1.03171
	676.025	-48.3795	1.60942			354.462	-144.779	1.21757			1249.42	-76.359	1.7533			802.103	-312.856	0.311121			667.237	-359.007	1.05845
	554.898	-5.80316	1.48791			429.226	-95.6567	1.35946			1221.96	-175.232	1.65048			464.241	-28.9491	0.473457			726.516	-194.417	1.0468
	291.674	199.369	1.46331			192.206	186.465	1.50969			880.822	-52.243	1.3419			546.537	-60.2494	0.370989			861.02	-232.027	1.10681
	634.845	224.392	1.18661			278.767	219.174	2.10657			1085.05	-125.719	1.74899			598.334	59.5919	0.460851			880.145	-346.637	1.13865
	75.9879	116.344	1.81651			567.161	-139.917	1.4061			774.98	-143.722	1.32311			837.51	-267.539	0.319772			966.137	-122.999	1.07382
	111.588	157.09	1.18147			435.106	-16.7978	1.36024			936.626	175.004	1.31739			325.662	-88.596	0.453158			817.051	-156.923	1.08941
	222.427	65.1181	1.72798			149.14	-22.8029	1.49104			1250.5	-198.396	1.24393			957.951	4.4959	0.404434			1072.05	-72.8672	1.0886
	42.9259	154.138	1.57935			513.679	-77.228	1.36604			924.678	-122.716	1.5604			444.068	285.848	0.44731			718.775	-420.357	1.02164
	802.359	99.674	1.2709			329.923	-25.2345	1.35585			354.326	-211.486	1.20063			768.084	275.476	0.42726			843.458	-244.916	1.14244
	536.515	-23.8332	1.40957			566.717	-83.9465	1.21605			625.002	-28.8736	1.22373			261.179	-97.1825	0.446409			1144.54	-140.211	1.23285
	551.318	83.7746	1.36916			532.456	-58.8114	1.21401			577.49	136.086	1.29429			217.501	98.0249	0.508645			441.735	91.4668	1.27697
	258.691	94.778	1.41241			349.466	-70.6263	1.43139			895.403	-157.94	1.20579			168.258	-19.2831	0.481742			704.672	-249.831	1.09919
	245.601	196.671	1.33913			822.999	-87.049	1.15524			1237.88	72.162	1.35702			380.818	-26.4164	0.433265			1027.3	-197.574	1.17563
	95.3865	83.7026	1.37041			84.9864	196.116	1.42641			712.424	79.8827	1.05324			593.691	108.037	0.529939			736.983	-172.606	1.01989
	362.589	49.741	1.41909			443.556	-71.4659	1.38986			637.901	-100.564	1.19521			1058.52	112.595	0.352497			558.051	89.6663	1.38478
	166.129	117.422	1.32069			447.494	-87.9201	1.42242			393.381	51.1182	1.17386			514.003	63.7942	0.398853			280.545	-108.986	1.17911
	39.6537	200.771	2.03936			607.532	35.3111	1.34135			938.079	62.5368	1.34805			1047.74	112.349	0.3452			773.278	-146.659	1.1121
	472.318	-57.7713	3.14017			546.142	51.2165	1.17579			937.811	173.032	1.24725			720.982	-1.51952	0.373902			712.15	-414.222	1.05888
	577.646	205.811	1.3168			0.707801	-17.3636	1.50118			1005.33	-112.472	1.52389			535.419	-66.9081	0.390547			1239.59	87.2301	1.72762
	603.45	114.167	1.51711			495.394	-132.132	1.39927			463.099	-22.1085	1.21531			640.49	25.5283	0.445816			632.492	-102.514	1.05076
	229.779	158.293	1.32967			140.685	-16.1927	1.37214			1224.42	114.823	1.30945			493.044	27.084	0.397263			809.722	-369.384	1.12608
	526.76	12.6472	1.47212			612.469	-205.145	1.50117			1077.5	-109.025	1.58867			581.383	108.332	0.378264			1154.22	-232.323	1.21854
	527.321	-41.2351	1.45714			632.001	-110.794	1.25244			1028.82	158.218	1.3385			941.233	255.546	0.341293			771.005	-42.8412	1.08346
	26.497	204.193	1.62127			640.994	144.936	1.298			525.478	-33.8725	1.15605			659.973	-265.642	0.327889			483.096	46.1572	1.39698
	359.06	-44.659	1.98309			658.92	129.738	1.23171			751.331	103.955	1.23015			197.729	-187.316	0.358385			783.937	-332.148	1.05486
	407.445	143.389	1.2857			143.379	-171.315	1.44467			1076.63	-229.701	1.57923			875.775	430.795	0.325635			592.748	-411.624	0.995838
	416.895	99.5097	1.37646			154.132	-148.692	1.44977			748.466	56.3993	1.35609			1070	-28.5437	0.314964			773.069	-56.7891	1.05193
	186.001	17.3891	1.40706			585.272	-192.145	1.53882			440.327	105.256	1.24699			375.519	15.9283	0.444643			1124.95	-291.234	1.17748
	307.223	281.747	1.42357			418.559	-185.897	1.41573			580.382	133.673	1.28411			208.995	79.2778	0.600989			891.285	-339.926	1.13738
	79.066	121.279	1.69077			410.189	-104.802	1.7123			612.897	-326.588	1.55823			323.1	87.7806	0.400957			783.97	-341.503	1.14827
	329.832	22.2197	1.52797			264.554	-143.284	1.67691			1100.6	-83.0982	1.51178			1047.23	-29.7931	0.328034			630.02	-301.047	1.11371
	20.2848	10.3923	1.06488			53.628	-105.998	1.64188			805.972	48.1675	1.22942			943.038	49.6874	0.325943			644.565	-206.772	1.01267
	163.317	209.213	1.4546			667.206	-1.40459	1.15739			1210.81	123.499	1.54119			207.781	-128.033	0.405204			920.14	-108.116	1.13423
	-1.97266	34.0851	1.2483			601.438	-115.573	1.3062			1006.04	-112.767	1.4063			1032.46	112.793	0.328936			1230.59	-51.7414	1.1345
	932.845	-254.764	1.57983			720.537	35.1604	1.16855			1169.82	0.00675424	1.52856			1007.8	294.758	0.290996			1007.76	-215.257	1.08364
	49.0606	136.239	1.54794			766.402	-93.4703	1.45691			449.866	4.31599	1.05617			374.373	45.6938	0.428541			801.746	-154.073	1.15339
	104.869	96.8488	1.5916			490.876	-37.9679	1.35078			801.936	62.2965	1.21266			368.445	-3.56072	0.433107			650.936	-286.134	1.00041
	64.0757	-31.2231	1.59114			271.627	-199.076	1.37532			1121.67	-311.072	1.81127			188.249	-107.34	0.387536			777.598	-425.092	1.05609
	53.4275	38.2611	1.45864			420.812	39.8691	1.34253			894.737	113.589	1.21417			957.48	48.9864	0.329328			1220.51	-53.9165	1.1019
	444.652	280.124	1.43201			255.762	-38.5702	1.30727			1246.55	249.196	1.09895			704.911	-60.9186	0.335856			655.499	-175.834	1.07575
	565.041	147.268	1.46489			686.75	-116.146	1.33026			509.835	3.90422	1.27919			1076.12	233.418	0.307126			995.454	-422.672	1.16923
	660.527	84.8493	1.4003			119.693	174.39	1.29805			596.728	-11.062	1.34743			193.753	-77.8606	0.445779			649.219	-29.2317	1.06478
	-11.216	174.73	2.04271			208.457	195.234	1.28681			895.799	110.474	1.23476			907.976	-90.455	0.298808			1076.87	-211.091	1.10976
	524.039	-31.2678	1.41832			279.952	-210.297	1.29196			1234.27	77.4425	1.57789			700.167	-34.2811	0.395197			402.818	2.83114	1.19052
	249.193	141.827	1.30394			119.248	161.857	1.29342			274.035	53.406	0.945108			779.507	82.3469	0.428994			916.209	-108.857	1.06764
	751.165	57.1239	1.42638			302.167	173.368	1.36303			619.1	5.00574	1.11401			562.014	-54.2187	0.362279			904.401	-411.91	1.16483
	385.253	203.524	1.62162			503.014	12.3087	1.3331			757.366	-104.179	1.19546			367.577	-93.683	0.499601			550.081	-27.8075	1.00927
	738.767	184.48	1.33041			104.924	148.181	1.47382			404.455	-5.83443	1.06708			568.706	372.92	0.351479			1059.68	-328.044	1.20299
	455.943	183.186	1.49823			154.455	-19.8096	1.49668			267.94	50.4952	0.992831			748.129	-94.6654	0.327501			887.553	-423.871	1.07416
	443.602	48.6669	1.38412			771.759	59.1381	1.27573			912.362	-106.853	1.30053			418.126	53.0509	0.404233			491.823	26.0909	1.33455
	283.663	-36.2799	1.96003			481.659	-19.9784	1.312			1076.98	-108.612	1.4408			637.966	4.38829	0.378574			976	-134.851	1.13747
	149.85	-23.0349	1.79893			969.877	-26.054	1.28197			920.721	-218.534	1.12785			142.02	-265.729	0.378573			396.39	-85.4097	1.28898
	207.495	292.154	1.57523			390.807	62.8833	1.32659			936.702	176.79	1.35751			180.202	239.295	0.383465			809.956	-205.374	1.11717
	461.516	157.413	1.23196			701.14	-100.028	1.40402			1247.75	112.985	1.20471			595.311	470.661	0.348786			335.667	-22.6001	1.255
	323.667	149.824	1.18869			256.559	158.225	1.44598			703.646	107.885	1.22024			133.689	442.646	0.471167			895.357	-362.034	1.1661
	46.3985	92.1037	1.67222			339.476	155.535	1.29724			763.238	69.5959	1.28976			866.924	-12.1339	0.346815			680.397	-335.728	1.01804
	305.782	283.861	1.35504			312.287	150.93	1.41127			772.386	104.666	1.39855			64.3454	1.71758	0.399082			791.771	-331.242	1.14563
	271.836	95.0373	1.53457			838.97	-45.5003	1.48973			751.666	105.737	1.21971			736.965	-40.7997	0.369771			786.006	-361.872	1.1184
	465.289	85.7354	1.47053			426.931	-114.733	1.34672			831.204	80.1241	1.22664			130.882	-275.886	0.383349			785.185	-205.707	1.1118
	279.282	284.789	1.64549			216.698	-204.371	1.56683			410.434	7.01171	1.14477			878.441	-11.1353	0.338767			845.139	-349.844	1.14909
	-6.00102	194.12	2.0819			32.6879	-2.97671	1.33588			275.931	52.7017	0.852766			425.841	-112.549	0.388368			662.686	-377.413	1.05125
	573.731	168.689	1.31943			359.286	181.433	1.28			1193.1	-132.093	1.38872			132.266	-252.282	0.348378			968.366	-422.973	1.15529
	144.578	21.76	1.59932			75.2045	-81.4842	1.62082			962.119	105.154	1.37351			305.041	100.494	0.380122			1154.94	-221.396	1.20363
	444.52	19.1313	1.29476			85.9543	252.355	1.55189			1250.48	-196.388	1.34917			249.8	94.6042	0.370882			1090.8	-148.589	1.16752
	275.234	82.9979	1.49374			306.965	-12.4207	1.41944			964.673	120.785	1.36392			159.475	234.826	0.408758			563.452	-223.996	1.0151
	71.3846	173.047	1.31901			574.09	-61.4544	1.28727			745.579	3.49682	1.48652			753.033	83.7606	0.354606			711.812	33.9972	1.47639
	193.398	166.156	1.57335			915.012	1.07485	1.29029			828.736	90.1107	1.44926			278.614	78.991	0.424374			1100.02	-57.6616	1.18535
	310.404	38.3903	1.27677			319.658	-65.2636	1.37245			479.509	-38.4196	1.01696			484.208	46.7543	0.374844			594.278	-154.301	0.985568
	375.468	34.2429	1.42638			88.6759	29.6965	1.32635			842.72	55.7155	1.23147			388.186	-14.109	0.374544			550.085	-155.455	1.00993
	890.784	50.6561	1.41087			474.906	-273.9	1.43419			1149.56	-87.1511	1.53713			406.139	2.79572	0.385628			977.117	32.9812	1.44306
	274.312	81.5139	1.43144			181.955	-121.804	1.57736			439.312	-4.31736	1.04802			547.65	-52.1992	0.391744			994.947	-46.5707	1.05876
	183.197	148.16	1.86872			479.279	13.4029	1.41098			1065.34	-90.0771	1.14968			774.409	80.6942	0.363771			639.347	-153.789	1.02584
	425.832	-18.9386	1.40474			650.67	37.1337	1.28458			795.976	9.892	1.16321			253.399	-313.049	0.345105			691.711	21.7153	1.44513
	33.2936	236.654	1.8005			355.704	36.2436	1.30538			1116.45	-117.061	1.62029			614.466	153.385	0.329473			1008	-259.173	1.11993
	288.994	48.1897	1.77353			311.676	-3.91343	1.43714			1159.39	163.543	1.57843			187.214	10.744	0.493542			1186.65	-331.264	1.23606
	371.04	77.9739	1.41854			560.351	9.95175	1.3446			438.867	108.215	1.21332			1061.02	-0.942889	0.262154			1239.46	-419.963	1.25742
	137.668	-85.9976	1.56997			397.514	130.83	1.39409			368.888	-92.2361	1.08176			934.277	113.614	0.308352			1024.96	-346.792	1.24811
	237.324	239.873	1.54625			665.785	17.5193	1.34764			958.821	90.5796	1.19448			82.2775	1.61982	0.384902			1082.69	-65.5156	1.16028
	454.007	175.939	1.35679			488.427	-157.57	1.50932			1166.78	-112.545	1.39466			271.237	152.757	0.403385			692.231	-169.78	1.02824
	296.597	12.4313	1.61202			499.352	162.437	1.33905			509.361	-24.2931	1.21113			707.971	164.851	0.367749			951.263	-187.49	1.08093
	-5.01878	147.116	1.43454			207.928	-124.196	1.52358			937.699	143.118	1.22356			962.444	110.854	0.315712			490.29	0.441346	1.35337
	58.7963	167.883	1.57889			61.8081	232.321	1.52055			394.163	-4.59307	1.19524			921.829	185.048	0.291911			1135.82	-236.644	1.12218
	568.171	-40.0886	1.58031			17.0858	0.63233	1.47155			1075.78	-108.583	1.47663			740.141	319.896	0.316267			1263.91	-281.731	1.20697
	97.211	46.7171	1.53938			581.794	114.797	1.2682			1212.77	125.06	1.45541			329.123	290.924	0.348802			1047.42	-271.265	1.16038
	219.853	78.8901	2.21397			207.242	18.5004	1.39708			1151.19	191.583	1.66141			208.186	191.345	0.384163			921.329	-134.751	1.1371
	394.873	-67.8462	1.52119			492.781	-75.1438	1.43242			1030.27	162.244	1.37871			527.284	-113.295	0.301386			865.146	-28.7969	1.08595
	555.464	89.8949	1.26811			208.883	164.806	1.36149			1100.07	149.569	1.41718			523.489	158.533	0.376138			715.285	-248.963	1.02136
	345.963	297.054	1.56319			223.433	102.629	1.2954			956.12	87.2527	1.40443			1029.03	0.430147	0.282665			854.45	-379.927	1.20099
	260.577	271.066	1.79711			309.51	-68.5661	1.64412			391.158	89.7521	1.1114			842.845	-279.215	0.289424			749.944	-84.8396	1.03051
	461.211	-133.935	2.3007			318.799	-141.401	1.4013			1250.58	-207.879	1.046			898.512	-71.8059	0.290106			1029.21	-259.011	1.18024
	650.946	268.848	1.2469			34.9152	-52.0131	1.61378			867.614	-332.469	2.44339			108.326	76.9886	0.423664			913.87	62.8487	1.55695
	172.785	187.665	1.59343			365.909	-115.16	1.34304			617.866	2.77279	1.14108			838.133	-131.379	0.273276			1060.96	-118.883	1.19301
	372.582	79.5408	1.44455			317.849	167.259	1.30508			387.793	91.9686	1.0973			900.213	-8.55301	0.32433			929.386	-347.066	1.21493
	331.098	26.7275	1.65432			127.407	-27.0947	1.47337			1029.24	161.167	1.47752			559.608	421.746	0.294152			1093.62	-219.36	1.10402
	531.481	101.979	1.30694			334.156	4.18014	1.5408			1197.74	-114.447	1.50037			1079.9	-3.69774	0.272347			982.999	-370.596	1.23283
	436.702	194.383	1.39216			325.898	39.3795	1.40573			697.546	21.6214	1.09808			661.194	-56.272	0.278055			883.213	-362.163	1.16705
	451.175	16.7695	1.86297			185.192	149.484	1.61599			549.115	-0.404966	1.16971			754.501	-39.278	0.303351			956.344	-40.538	1.13508
	79.1011	-19.5351	1.4151			341.412	-9.14262	1.43049			498.071	61.8208	0.941245			651.149	-114.259	0.3252			818.269	-146.366	1.15712
	20.2207	-2.8706	1.20238			170.599	-135.532	1.6173			365.391	-90.6208	1.08372			301.156	59.9251	0.312262			838.475	-421.952	1.09714
	147.04	124.315	1.54538			530.091	-72.508	1.30723			757.002	87.5107	1.18993			129.56	220.605	0.399371			718.326	-293.625	1.02832
	530.4	245.775	1.2727			186.323	-152.601	1.56835			1220.62	144.035	1.03742			802.651	402.911	0.277712			848.816	-381.575	1.16544
	664.717	115.209	1.16046			274.755	-86.3323	1.48498			958.877	106.571	1.46077			546.723	12.1967	0.349198			273.253	51.1864	1.35006
	102.255	-38.2254	1.84266			215.041	-34.0423	1.78286			1169.08	-0.459834	1.56213			124.129	-218.148	0.315271			983.748	-239.722	1.12165
	745.604	180.259	1.1727			951.911	209.952	1.40814			1228.22	-122.071	1.68377			1024.06	76.1785	0.247029			890.453	-96.8091	1.12411
	219.528	152.818	2.09216			373.677	17.717	1.33024			638.422	-16.8699	1.1213			1026.85	-28.8386	0.267156			668.644	-127.541	1.06878
	244.683	197.424	1.51095			419.208	-144.679	1.35239			1242.38	156.389	1.5925			759.246	164.342	0.337041			1122.87	-248.12	1.25623
	334.202	213.737	1.42513			270.176	77.4631	1.3357			625.553	45.3202	1.08401			239.638	182.875	0.340796			1053.09	-209.438	1.11035
	300.673	77.9836	1.71068			124.447	190.327	1.3638			746.624	7.21315	1.47733			372.29	94.9228	0.306821			666.216	67.331	1.57139
	227.005	67.1015	1.6532			132.826	-153.516	1.47062			828.999	151.438	1.31015			934.93	42.3526	0.269374			1254.23	-315.795	1.2139
	83.7543	-59.7386	1.6292			457.086	89.8326	1.2828			704.934	83.7469	1.1098			627.283	-53.333	0.26711			1252	-404.746	1.33801
	140.723	193.348	1.54518			438.339	-39.0615	1.39599			998.955	89.2491	1.21889			289.253	427.2	0.351379			867.696	-407.694	1.17685
	354.111	32.4428	1.44583			350.1	-34.7587	1.27222			655.71	-12.0794	1.05474			998.357	110.334	0.249404			809.245	-267.858	1.12889
	189.407	-64.9931	1.63657			406.451	162.011	1.31663			766.922	16.7313	1.15832			100.103	120.025	0.453997			1191.1	-420.5	1.15997
	-2.84148	88.5145	1.3873			368.62	153.738	1.30648			1241.79	154.704	1.51959			296.103	41.1738	0.377123			805.527	12.2555	1.26561
	-6.01086	133.303	1.25774			213.438	-67.3117	1.5679			723.471	43.0346	1.18539			434.635	-114.544	0.278402			897.677	-168.319	1.06628
	289.291	54.2705	1.56012			516.594	153.394	1.351			793.093	3.85038	1.09002			196.014	247.723	0.347579			1070.89	-190.267	1.15951
	382.1	111.702	1.54152			514.421	72.6213	1.32472			673.307	2.96515	1.11837			574.287	455.733	0.270422			944.83	-104.465	1.12432
	638.701	102.198	1.27449			202.726	-18.7563	1.48918			1072.4	207.495	1.42871			892.05	-14.8343	0.277377			986.525	36.4569	1.45904
	215.237	25.5132	1.64759			173.075	-20.8094	1.30448			1010.18	92.6831	1.13599			291.836	-132.19	0.313926			1207.53	-143.006	1.1213
	625.876	-47.0603	1.96053			518.577	-223.525	1.62452			670.435	47.2006	1.1128			328.73	280.316	0.315318			912.116	-246.692	1.09995
	604.27	114.317	1.39668			180.734	-39.2363	1.36001			719.422	38.4207	1.22568			232.558	227.86	0.264895			1111.77	-222.461	1.10944
	182.245	173.475	1.773			446.771	-46.4776	1.52528			1076.34	108.545	1.46517			569.709	405.712	0.266002			1059.16	-268.043	1.12767
	299.245	178.901	1.45154			11.2919	-32.4983	1.58629			626.566	44.797	0.96084			158.27	10.0222	0.360812			716.083	-139.624	1.02846
	643.196	113.742	1.35678			563.808	171.613	1.32609			619.25	-1.45822	1.01108			274.787	120.455	0.362022			924.782	-153.67	1.12939
	297.446	77.8409	1.75056			335.929	-155.065	1.39499			699.92	38.687	1.07752			337.542	17.3102	0.323213			684.315	-251.438	1.01473
	182.276	148.382	1.82225			156.256	24.488	1.21251			619.917	-8.53556	1.02158			226.62	-122.444	0.302305			943.868	-297.906	1.24549
	293.715	316.832	1.64365			358.395	-178.683	1.52922			673.808	3.39457	1.06405			1042.73	433.361	0.235936			767.924	-401.559	1.04878
	207.698	290.683	1.83833			309.521	12.0463	1.29871			464.898	14.6907	1.08653			613.463	450.08	0.273561			944.496	-126.971	1.07597
	624.618	-46.2574	1.87344			49.7137	-45.0306	1.54224			1125.71	-112.781	1.53826			1071.54	413.751	0.210093			389.684	84.7534	1.39289
	228.061	51.214	1.56499			100.509	110.609	1.33246			796.912	9.02619	1.15476			591.998	450.1	0.246447			895.856	-150.009	1.06579
	504.619	-19.5988	1.77622			194.789	-66.9115	1.58801			1048.43	-32.7209	1.25019			126.837	157.49	0.332684			460.577	-106.573	1.28675
	250.182	-91.3169	1.75687			105.591	58.857	1.29855			1150.43	191.273	1.43964			456.058	78.3853	0.30122			908.936	75.7777	1.63707
	958.944	32.9511	1.21834			783.087	5.73515	1.31659			822.592	18.9908	1.08091			949.382	-146.398	0.226855			884.931	-51.6947	1.06314
	416.507	32.9718	1.73987			660.728	-70.4557	1.35286			857.282	59.713	1.1043			348.471	360.489	0.32086			731.41	-379.211	1.0498
	183.643	167.239	1.54723			229.301	-68.5698	1.53893			956.152	88.596	1.46457			917.625	-13.4778	0.252778			1224.16	-339.929	1.19559
	293.73	289.096	1.53823			456.549	-106.95	1.41544			1153.78	-121.152	1.53235			232.516	10.0941	0.343827			922.463	-423.483	1.11149
	622.596	337.023	1.37646			613.162	-17.3577	1.32438			1218.59	143.705	1.46918			1067.04	29.5236	0.261048			1193.8	-221.768	1.0958
	579.845	-12.0932	1.50977			561.508	-107.988	1.29411			841.885	119.448	1.44726			304.594	-198.654	0.249728			512.51	184.942	1.23201
	466.587	72.9042	1.41425			866.609	8.79207	1.23896			1140.26	-121.719	1.46351			484.685	148.668	0.308485			1136.29	-216.588	1.11001
	356.274	207.854	1.4593			83.9812	-58.0671	1.6099			1129.85	-39.1348	1.81538			716.404	-296.799	0.225654			998.301	-267.295	1.16432
	537.93	-29.7468	1.54223			483.54	-188.659	1.36667			1141.31	128.735	1.33821			611.755	410.269	0.223101			790.795	-283.386	1.10738
	219.939	76.5232	1.95417			583.015	-92.3933	1.378			492.041	-5.36689	1.21754			923.55	-65.5583	0.264833			1043.56	-245.906	1.19947
	734.739	63.0953	1.26144			738.597	-62.3055	1.39764			712.947	45.394	0.975853			587.814	406.959	0.230398			905.678	-284.98	1.09418
	124.536	243.292	1.75363			867.132	-63.8783	1.26399			723.597	40.4646	1.20469			597.901	427.969	0.248738			897.574	-265.944	1.10465
	316.893	186.071	1.65892			713.361	-33.6358	1.23426			1139.19	-104.819	1.55681			621.01	360.258	0.247255			900.697	-394.93	1.10789
	201.829	-73.1442	1.58771			247.56	-103.125	1.52319			456.86	-82.0708	1.01181			685.976	484.728	0.19635			1055.03	-144.138	1.17082
	255.608	85.7954	1.57033			1056.75	-262.809	1.35034			844.561	153.922	1.29006			120.849	115.316	0.366705			933.157	-253.819	1.07569
	148.761	57.0387	1.44606			7.97843	-87.1012	1.75749			650.372	20.2298	1.1188			768.097	-79.5212	0.235649			775.221	80.3852	1.44906
	298.802	9.55991	1.63892			857.346	24.575	1.39127			1127.13	98.8765	1.61127			195.084	-257.352	0.217371			736.58	13.446	1.41555
	641.273	111.844	1.26709			755.109	-31.1071	1.23277			933.148	-385.441	1.37874			34.4454	116.309	0.363038			909.968	-272.378	1.1857
	45.5736	123.646	1.73134			528.149	-41.4012	1.38624			1127.07	97.6809	1.28895			899.003	-0.591009	0.232617			1259.11	-341.985	1.17333
	-0.378925	144.983	1.64117			772.765	-23.43	1.25489			954.926	-209.274	1.4336			643.406	59.2293	0.23315			987.244	-339.345	1.23884
	367.727	-221.146	2.13303			892.395	-91.2269	1.45258			552.451	-103.411	1.35605			487.352	-113.81	0.219483			917.352	-304.141	1.13957
	106.582	117.344	1.52041			59.7693	56.9211	1.64435			414.533	-161.773	1.1233			485.514	71.2397	0.265359			1050.44	-270.623	1.22005
	348.896	70.2957	1.35426			796.699	-76.7316	1.35366			676.864	125.917	1.38087			268.267	352.449	0.245875			1056.16	-421.998	1.0967
	263.872	59.7213	1.55828			402.018	-157.668	1.29093			634.834	-13.3872	1.36572			70.2631	-116.164	0.240725			728.184	-285.148	1.03023
	661.247	372.169	1.2621			-2.48412	-76.5625	1.63677			633.202	56.6563	1.25301			323.88	99.6385	0.254531			870.083	4.21889	1.45079
	254.002	56.4206	1.51734			235.108	-133.348	1.69095			723.516	133.856	1.16871			45.6089	-307.442	0.279386			438.392	151.731	1.20137
	470.245	-57.3861	2.51107			329.002	-101.669	1.54968			554.319	-107.325	1.3231			665.405	-81.2336	0.217415			794.536	-275.12	1.15017
	326.943	-22.6368	1.6734			398.975	-83.3379	1.4074			351.108	-164.201	1.24698			740.985	-64.4166	0.223711			849.396	-120.427	1.06742
	380.758	302.9	1.5026			99.9863	43.5536	1.29857			636.525	-106.565	1.29128			206.638	-243.245	0.185492			721.736	10.92	1.35895
	269.19	-11.6662	1.50762			545.799	20.048	1.35815			901.767	-103.763	1.33616			205.296	54.1075	0.315294			350.734	-166.28	1.2014
	203.218	149.232	1.79028			357.35	-72.0971	1.38642			202.696	9.08834	1.14688			245.863	421.532	0.268393			812.342	45.8723	1.86397
	719.32	352.831	1.34183			112.242	-14.9449	1.59113			491.922	-171.701	1.27426			1047.96	25.0379	0.176544			1101.49	-300.435	1.17174
	45.8774	124.846	2.20566			44.4967	11.7216	1.3632			579.884	206	1.29218			153.46	209.099	0.246144			1088.14	-327.352	1.19246
	377.17	131.919	1.39953			353.05	-113.672	1.37642			767.469	-234.116	1.6159			449.193	385.691	0.21971			1125.75	-118.054	1.10914
	326.16	-25.3311	1.36215			271.879	-189.194	1.46513			868.857	355.614	1.08999			242.742	348.302	0.235432			1210.68	-398.283	1.32127
	696.277	171.541	1.2728			283.609	18.7116	1.34229			76.0561	-28.0236	1.11666			868.979	23.8979	0.193202			1104.03	-346.898	1.19944
	45.7499	124.721	2.0254			95.6569	-57.705	1.62905			565.462	-355.666	1.24811			1056.97	74.2761	0.188319			962.232	-302.378	1.20565
	454.064	82.44	1.49293			274.476	4.86289	1.32344			929.429	103.823	1.47391			705.75	140.842	0.234702			1018.52	-322.889	1.14245
	368.775	-193.76	1.79837			732.334	-77.7559	1.23669			814.342	267.495	1.09435			423.235	370.976	0.213225			794.046	-191.63	1.08602
	146.118	-230.541	2.35284			289.015	-38.0291	1.42192			175.68	65.0634	1.05632			460.124	-107.258	0.233266			936.209	-300.786	1.1233
	151.237	-24.372	1.74716			282.62	-61.3758	1.44634			489.537	83.6782	1.22567			424.26	144.99	0.218006			982.263	-273.555	1.12517
	65.9246	248.86	1.71634			435.51	-158.557	1.39938			564.671	44.0418	1.21718			437.154	144.245	0.23141			937.016	123.263	1.54053
	505.115	46.1426	1.55588			288.523	-101.43	1.32824			516.732	262.915	1.26253			1033.28	365.442	0.163585			1016.04	-260.922	1.18721
	742.419	184.388	1.26043			174.489	48.7896	1.40736			252.15	72.6996	1.19474			456.872	-112.435	0.202235			877.066	-294.244	1.09165
	517.621	55.6789	1.43384			605.45	-76.0762	1.27446			1031.36	188.29	0.970544			908.965	110.131	0.183375			703.072	53.3334	1.3794
	477.509	174.367	1.33422			129.805	-98.1213	1.53919			814.644	30.9706	1.38707			442.217	148.202	0.224495			758.986	36.0162	1.45963
	402.494	164.652	1.56922			595.094	-90.7195	1.63102			958.086	195.232	1.43513			486.194	69.4989	0.225501			1245.19	-419.899	1.20645
	66.9663	119.815	1.79254			323.883	-116.621	1.50188			780.733	-163.63	1.32919			890.047	101.983	0.195772			1181.32	-297.345	1.2317
	149.121	158.069	1.59596			108.393	-85.2529	1.49132			621.08	91.037	1.17376			985.351	-29.0568	0.158731			983.087	-324.02	1.16223
	583.661	67.5131	1.41406			354.674	-86.0638	1.46836			703.904	-141.478	1.31114			404.457	146.083	0.224914			1109.99	-412.1	1.21213
	289.577	111.086	1.12714			548.057	-7.91495	1.33569			872.073	-176.132	1.29876			190.475	59.9589	0.265744			1139.3	-329.231	1.15381
	179.853	-87.246	1.52306			256.623	-110.096	1.57367			256.356	71.307	0.91346			306.982	-91.1751	0.438068			1026.76	-301.303	1.17909
	-17.1239	46.3036	1.27242			169.804	0.655825	1.36018			655.424	-126.723	1.34339			236.355	360.042	0.224798			940.133	-311.325	1.10586
	209.865	66.702	1.52187			555.843	-22.1827	1.30129			718.04	195.368	1.14384			215.051	356.967	0.257575			745.021	-414.857	0.999835
	579.597	72.621	1.47163			173.86	-97.8829	1.5025			764.77	168.011	1.24761			734.863	269.002	0.195336			892.995	-384.364	1.16567
	467.403	74.539	1.49921			142.262	-121.979	1.63794			416.766	37.5127	1.20583			896.56	506.109	0.14781			1211.98	-311.27	1.29993
	304.442	254.47	1.5865			235.886	-123.611	1.94252			525.064	-82.5094	1.23122			1008.14	-29.157	0.156001			650.173	95.0825	1.46064
	67.9546	178.075	1.86225			11.4621	-51.7674	1.54438			514.596	202.97	1.197			458.883	-119.292	0.191718			775.345	-125.974	1.09431
	620.758	-77.9708	1.68306			337.025	-47.2139	1.29657			348.739	-60.6037	1.20365			665.488	22.1325	0.206133			1066.79	-421.88	1.10143
	832.417	113.362	1.30816			457.159	-205.082	1.40718			993.049	-225.151	1.40428			449.506	346.72	0.204194			1071.27	-294.59	1.10022
	787.177	131.82	1.44158			359.57	-215.277	1.58795			861.3	139.608	1.36622			410.07	357.532	0.195668			1186.53	-258.481	1.14903
	721.004	97.9545	1.3376			660.648	-18.7951	1.29452			470.525	-47.2195	1.135			513.651	-185.194	0.175929			971.308	-321.575	1.15058
	217.103	126.418	1.68389			301.28	-84.4779	1.38091			657.39	-36.7833	1.3506			641.587	-196.734	0.168773			1144.99	-323.085	1.27724
	483.411	40.2368	1.62132			263.916	-129.322	1.6475			1063.84	-148.324	1.65813			392.681	98.6291	0.206322			1085.72	-275.206	1.13038
	482.393	39.0112	1.40721			148.693	-54.134	1.54422			862.321	-291.48	1.64639			502.283	-190.342	0.170684			1149.69	-314.128	1.12066
	261.431	264.603	1.67298			304.017	-112.431	1.41624			1058.04	112.713	1.34376			1085.03	74.6575	0.165544			719.466	-366.888	1.01811
	328.357	-23.2474	1.6497			768.247	-35.9437	1.39771			506.156	315.067	1.17929			700.961	-24.844	0.209826			1233.02	-283.25	1.17121
	535.468	228.877	1.44942			584.199	-28.1736	1.26404			602.692	-106.641	1.36873			986.779	-2.57376	0.144706			932.137	-336.805	1.09879
	77.1454	18.1548	1.81942			579.728	0.382134	1.39693			1131.62	209.483	1.61922			654.456	92.2492	0.189488			921.224	-348.154	1.12954
	384.657	92.2741	1.44438			215.465	-105.442	1.56743			509.748	31.8094	1.09601			185.7	-298.418	0.174022			1242.61	-230.586	1.11462
	23.3449	122.2	1.91894			246.725	4.64468	1.68447			655.493	-49.557	1.39525			877.23	43.658	0.15313			1021.59	-247.559	1.09242
	452.946	14.9892	1.61087			177.081	-180.109	1.5426			141.323	23.5013	1.11791			208.357	-168.624	0.166636			1211.2	-244.038	1.09248
	409.703	141.505	1.30362			402.742	-14.208	1.35889			805.854	-69.8327	1.51435			485.463	-187.61	0.153252			951.29	-276.782	1.13383
	126.399	-28.0754	1.66402			436.295	-145.488	1.35887			542.952	-57.0288	1.34251			1156.1	94.4817	0.121576			830.292	-72.4377	1.06962
	180.9	-87.8134	1.56674			394.401	5.85136	1.39322			468.014	2.76059	1.20876			207.499	-288.485	0.15143			1190.35	-301.357	1.16542
	59.3667	219.102	2.07534			393.826	29.2078	1.31249			925.092	-290.558	1.5734			723.195	-95.4618	0.193395			763.915	-256.039	1.0447
	194.896	126.593	1.91274			435.44	-9.60151	1.33076			650.97	-120.494	1.21588			31.67	49.3742	0.233947			1080.12	-347.189	1.21698
	202.081	-72.2524	1.87665			60.1726	-23.7812	1.51781			544.196	-318.023	1.15319			1046.07	434.325	0.144626			670.963	-31.4714	1.35898
	102.149	-54.7036	1.63222			617.505	-40.6893	1.27758			385.87	-39.7697	1.26507			525.311	-181.774	0.171001			1039.47	53.2698	1.66982
	411.744	89.672	1.57633			606.016	-2.33931	1.38123			645.081	-83.9623	1.21395			735.617	-137.233	0.158888			940.326	-420.03	1.09117
	235.199	-69.5877	2.13051			109.239	-58.3731	1.55694			344.595	48.0677	1.20201			253.998	-141.851	0.150437			1155.05	-292.166	1.16424
	785.231	-53.3075	1.21108			621.424	10.4346	1.41449			828.568	222.192	1.12914			962.126	-280.675	0.129944			1082.21	-281.152	1.1917
	254.759	-69.6757	1.99073			196.552	-298.356	1.96051			676.852	126.982	1.16419			613.002	158.3	0.178741			1007.02	-304.323	1.22781
	199.594	35.0766	1.54639			633.738	185.558	1.16444			843.652	220.723	1.5445			176.568	-144.367	0.172307			788.616	56.0004	1.55199
	563.805	-39.731	1.63825			268.676	45.6078	1.37995			901.757	145.461	1.22392			275.927	14.3188	0.167533			880.029	41.5876	1.53168
	326.603	66.2074	1.61138			625.921	-53.4532	1.21166			772.318	-352.581	1.54073			320.107	-8.81512	0.200231			851.747	-281.948	1.06195
	489.676	160.663	1.5033			165.43	-62.9546	1.56784			524.98	326.066	1.18828			435.134	14.1715	0.170977			669.588	-128.696	1.00312
	306.879	283.468	1.63778			400.336	-135.745	1.29805			201.193	48.4918	1.12579			1029.94	440.341	0.141101			346.347	-87.4175	1.34474
	308.866	285.446	1.87078			510.558	-3.67589	1.43014			504.601	-33.0908	1.17604			917.105	-273.905	0.11983			420.044	-21.073	1.41447
	418.401	-7.75126	1.60248			388.888	-96.3513	1.36488			458.223	58.7453	1.20803			972.008	-16.6241	0.132841			703.093	69.4306	1.35149
	583.876	-42.1446	1.81712			441.339	11.7742	1.38842			140.107	24.3857	1.30138			318.944	184.67	0.212904			1216.92	-359.786	1.25858
	331.464	52.9637	1.67381			457.797	-188.333	1.41891			717.978	113.304	1.2725			815.457	79.6197	0.154001			1240.04	-261.798	1.13661
	-2.43108	226.271	1.72483			73.8978	1.93871	1.713			709.016	-108.419	1.27952			951.125	-254.595	0.106749			1024.4	-169.478	1.04894
	257.708	-56.3791	2.23446			194.086	66.6716	0.5419			560.666	194.611	1.08527			895.81	-142.287	0.124055			839.001	-357.083	1.10675
	374.438	155.637	1.53984			471.834	-254.384	1.21288			268.076	5.66807	1.27388			222.975	-148.496	0.149944			1184.44	-330.294	1.24663
	270.31	191.692	1.77927			270.068	-82.601	1.20801			597.023	158.66	1.09017			752.724	-118.706	0.139412			1081.93	-421.712	1.09197
	183.704	74.2714	1.88227			1174.86	-122.994	1.51664			918.083	-126.405	1.35179			718.11	80.7217	0.167657			1180.09	-362.753	1.32627
	833.565	371.113	1.16935			669.975	-126.075	1.48485			534.57	-157.307	1.24123			52.2974	63.5046	0.191559			1235.7	-357.923	1.2028
	-6.70216	92.019	1.01793			501.803	34.9531	1.34191			514.829	61.9901	1.32982			131.149	131.802	0.197972			998.356	-345.551	1.15451
	46.9991	-262	0.374502			968.501	-235.627	1.21554			994.373	-224.793	1.51543			1090.59	12.7229	0.133725			822.67	-281.287	1.11336
	12.8182	97.1688	0.832049			515.598	225.441	1.47139			581.929	37.4087	1.15006			738.335	111.98	0.139469			876.267	-319.314	1.11041
	58.8194	-179.874	0.245291			492.504	229.16	1.36599			336.824	-137.997	1.15558			745.28	266.736	0.129043			675.048	-22.7885	1.33837
	-214.569	463.515	1.25627			328.668	-19.155	1.12713			732.835	-61.5227	1.16697			738.84	45.3638	0.154648			965.163	-423.009	1.07334
	-213.854	82.2013	1.13573			634.24	85.1211	1.2792			897.621	84.1721	1.37641			714.005	69.2548	0.162329			670.127	46.5342	1.40288
	247.355	-260.988	2.16807			609.111	-162.111	1.1763			957.89	-99.9048	1.45084			586.778	162.551	0.139951			1071.31	-393.167	1.30015
	593.995	411.002	1.29197			746.58	-225.572	1.31815			939.029	-166.787	1.44739			832.791	27.2545	0.12313			874.769	-415.643	1.04699
	155.867	484.993	1.1121			336.641	-158.005	1.31231			803.066	-70.6679	1.62628			717.745	-98.9782	0.118477			853.197	-51.9601	1.50741
	614.34	254.833	1.44031			546.247	88.12	1.28929			577.099	83.8466	1.09385			96.7218	-136.619	0.163028			1147.57	-297.13	1.11936
	-213.999	159.317	1.17037			1085.1	322.966	1.28585			349.356	-60.7119	1.24809			359.385	99.9544	0.125266			848.868	52.6693	1.48521
	686.312	-60.4557	1.25558			609.73	302.728	1.35829			1159.4	-32.6982	1.39983			948.712	415.047	0.098862			875.396	-379.731	1.12074
	73.346	89.7026	1.06997			847.068	201.062	1.52384			871.532	34.7785	0.887829			935.961	427.62	0.104061			1213.89	-253.728	1.19112
	129.209	-230.329	1.94809			887.806	51.5844	1.39721			952.24	-135.71	2.2572			681.88	-9.27375	0.127277			738.944	77.4402	1.53884
	70.5333	484.833	1.0391			880.253	100.183	1.38052			952.676	-133.38	2.09501			223.473	-48.2218	0.133818			1170.65	-247.514	1.21528
	616.223	221.483	1.13031			688.199	-116.144	1.29276			929.214	6.37659	1.45342			881.824	-251.696	0.0968128			794.916	-414.009	1.0544
	-214.352	347.779	0.994725			264.918	-68.5683	1.19932			882.688	-108.77	1.25619			471.219	-6.18362	0.140199			961.783	35.5791	1.45387
	147.02	-65.7935	1.59018			568.046	73.5756	1.25209			804.942	-70.8527	1.41333			364.436	117.55	0.111383			1205.92	-381.117	1.29988
	72.9005	-58.3694	1.26286			737.169	28.4672	1.32172			587.671	-120.044	1.3288			237.365	-23.5587	0.153335			999.537	-299.627	1.14419
	173.221	485.026	1.08334			237.305	-22.9018	1.22274			624.099	12.5169	1.22082			760.39	112.861	0.116171			1079.6	-247.218	1.17499
	-116.396	484.483	1.18538			1214.26	-106.381	1.53232			1029.79	-201.951	1.3982			64.6229	106.888	0.164951			1265.32	-409.309	1.2714
	-214.462	406.07	1.23079			626.961	-156.799	1.29815			989.32	-170.411	1.38452			674.365	-99.3533	0.112096			649.426	132.119	1.69951
	-40.6854	484.625	1.13317			630.094	281.678	1.45267			444.921	292.05	1.18919			533.604	-139.286	0.113321			802.467	-219.639	1.29149
	-40.8165	484.624	1.06017			1026.04	-273.105	1.27059			1113.44	-82.5002	1.74427			955.423	373.619	0.102448			916.881	-386.898	1.08371
	353.974	-107.2	1.50829			1043.96	-190.18	1.46918			782.705	15.1546	1.27737			256.06	-68.2308	0.126258			1161.78	-278.166	1.11395
	-214.212	272.719	1.16522			658.118	-177.399	1.35123			719.337	-104.365	1.12115			461.304	11.805	0.116376			1015.51	-403.09	1.24632
	564.093	68.9865	1.46834			950.707	98.7498	1.40368			741.941	-73.5703	1.30161			115.858	0.246227	0.137853			446.691	-27.9125	1.34333
	-214.569	463.45	1.18491			684.63	-260.53	1.44003			806.044	206.931	1.21335			39.3943	7.32464	0.178564			617.905	64.0543	1.41781
	176.475	-252.663	2.4006			487.326	-156.664	1.40908			659.608	59.7499	1.5077			438.435	166.344	0.124525			1009.17	-407.083	1.23425
	630.251	454.036	1.28587			786.34	158.363	1.34119			840.694	222.009	1.58335			137.557	-7.82684	0.125021			525.305	-12.2926	1.28706
	167.028	-276.136	4.16885			268.684	54.1352	1.28693			537.149	-57.2154	1.53617			678.192	111.057	0.113707			1253.9	-383.507	1.33913
	424.673	223.273	0.975774			276.751	-97.0183	1.16467			829.106	-1.23171	1.3389			248.899	-39.1635	0.112095			641.355	22.7852	1.51781
	-139.306	380.251	1.18949			332.61	-35.6713	1.16955			1055.26	-7.67262	1.27589			159.434	-11.8368	0.122586			997.378	162.818	1.68788
	702.219	78.3434	1.27374			477.28	49.0984	1.17281			665.58	-74.5752	1.25118			827.653	17.9372	0.0957515			503.946	35.8082	1.43597
	781.328	-25.2555	1.31204			89.5164	-44.17	1.22179			588.317	-7.04345	1.1952			917.843	425.107	0.0799776			1203.26	-260.033	1.12756
	731.159	113.067	1.4186			252.826	-56.6578	1.19156			723.476	188.596	1.2205			80.5416	79.5576	0.152317			1116.92	-361.685	1.34863
	661.058	239.469	1.24949			1113.17	47.0843	1.45065			709.164	-131.295	1.65937			44.533	32.9878	0.118183			1126.29	-409.535	1.16572
	773.741	107.221	1.35358			495.16	21.5684	1.46276			681.805	-14.1339	1.17598			0.488384	95.2727	0.144251			1191.87	-272.42	1.11873
	534.578	-261.641	1.98684			743.784	-172.255	1.2902			895.003	81.106	1.54835			21.3138	90.6518	0.151145			485.404	-107.637	1.23649
	217.224	485.108	0.957076			756.616	279.895	1.48534			369.03	-4.11711	1.25542			706.851	114.816	0.099896			563.973	12.0322	1.38587
	593.275	411.228	1.38006			818.427	65.5193	1.34264			950.232	163.838	1.45247			224.363	-60.3859	0.10209			1144.7	-415.525	1.1845
	655.009	129.469	1.23158			1202.51	-277.417	1.42119			1073.5	-74.414	1.41076			704.787	-7.01911	0.0999022			1186.11	-363.43	1.26453
	-214.472	411.44	1.22538			537.834	-127.374	1.45108			551.337	-3.11683	1.27434			46.184	-142.428	0.110282			637.001	-8.31308	1.28631
	429.288	-68.0175	1.29742			656.026	87.8147	1.37323			879.842	-130.328	1.33309			948.128	91.1355	0.0787541			1242.84	-380.698	1.29475
	-213.847	78.3663	1.08905			401.26	-125.904	1.21976			360.517	-9.45084	1.12048			73.0773	49.9434	0.140182			858.638	-403.663	1.07237
	-214.243	289.486	1.15551			1140.09	-165.833	1.40122			633.887	29.6112	1.15676			883.528	167.548	0.0931164			830.284	79.8596	1.50427
	345.918	-244.54	1.75608			1202.56	-76.423	1.45462			525.787	-0.938638	1.27151			242.149	-70.0034	0.103859			595.531	15.3369	1.3705
	-201.028	484.324	1.11901			1163.98	25.5596	1.41634			936.689	-58.2353	1.38484			126.394	-8.72501	0.104953			1133.93	-389.365	1.29351
	627.045	-165.269	1.38489			651.248	318.407	1.35344			900.429	143.836	1.13766			859.329	-231.744	0.0814837			1251.94	-404.776	1.33836
	467.526	281.352	1.48941			997.977	-113.004	1.35784			789.234	-12.7946	1.23664			101.506	158.2	0.152121			1092.29	-200.38	1.42351
	501.431	-259.207	1.58095			681.878	-157.78	1.22352			392.882	11.2418	1.22761			156.603	178.134	0.09574			1265.01	-381.423	1.31427
	-134.685	484.448	1.12629			431.88	-33.9498	1.16604			888.285	8.63028	1.36477			146.584	268.45	0.0955347			1142.61	50.6399	1.59708
	162.574	-233.986	1.91813			1199.37	346.152	1.5907			1010.53	192.287	1.30556			509.736	270.821	0.0878279			763.977	-243.073	1.27965
	314.438	-94.1598	1.8052			540.154	40.0839	1.2493			538.662	-59.5212	1.29995			108.83	5.75685	0.140581			944.874	-365.753	1.29488
	-214.533	444.081	1.1879			803.585	103.564	1.60853			489.107	83.7586	1.08319			32.4063	-230.444	0.0867658			833.246	-55.9179	1.30281
	277.334	176.318	0.923446			1202.69	-66.2398	1.41855			390.077	20.2727	1.12222			639.324	74.97	0.0761924			1201.97	-368.518	1.24352
	394.018	-40.0415	1.3843			79.047	-44.8134	1.1933			886.759	-41.7185	1.36092			791.826	24.9054	0.0688296			802.254	37.5668	1.61108
	-43.1217	409.541	1.09024			598.258	108.555	1.31528			533.484	6.65551	1.3299			660.083	153.632	0.0735897			344.142	-101.444	1.34617
	237.697	133.895	0.998737			365.613	-53.7319	1.19059			749.03	-210.302	1.0995			46.3314	-195.711	0.085283			1131.47	-411.181	1.21508
	50.9316	179.005	0.88286			628.694	-120.521	1.32196			998.466	-107.604	1.27573			393.294	62.7433	0.0656345			828.721	15.9693	1.42037
	446.678	386.052	1.25045			994.44	-123.803	1.48518			1010.61	191.266	1.34334			877.898	132.314	0.0621561			1031.89	-383.626	1.56492
	-214.309	324.835	1.22992			226.888	-24.4269	1.2555			590.778	-39.1598	1.12063			870.788	-45.9456	0.061412			946.991	-400.312	1.24427
	769.529	26.5444	1.39397			1073.75	110.601	1.50634			338.401	-138.538	1.33478			445.133	412.903	0.0762372			1099.61	-405.267	1.25576
	131.302	108.255	0.943346			376.979	18.9463	1.32269			342.368	-60.5945	1.38662			419.058	209.262	0.0642296			1213.98	-411.128	1.34133
	705.134	-66.8574	1.4772			374.27	35.5246	1.29242			714.801	56.952	1.24849			696.621	52.483	0.0650554			609.1	-8.37088	1.49626
	604.773	155.094	1.22517			707.444	82.6316	1.26218			972.506	-3.48121	1.23886			453.956	54.6256	0.067436			939.903	45.9167	1.70519
	140.986	-270.714	2.75194			488.808	-15.9168	1.24505			758.051	53.9917	1.16199			50.2945	-166.956	0.0618538			1132.35	-377.687	1.43635
	737.902	178.401	1.15528			1163.44	-185.577	1.60652			586.682	-7.20663	1.15401			438.85	-233.205	0.0801185			971.717	-350.959	1.42074
	111.206	-275.361	2.05871			665.362	-108.339	1.19735			539.745	-352.118	1.44442			131.826	94.4359	0.106165			1111.61	-404.315	1.25547
	216.257	-57.9278	1.4999			555.192	-49.3906	1.2533			381.626	-37.3468	1.31809			456.04	197.112	0.0517967			1203.19	-405.458	1.43459
	804.29	459.579	1.25453			474.46	-96.6513	1.15839			1050.4	65.6408	1.29531			409.004	207.3	0.0524248			483.231	14.5548	1.44406
	579.677	-15.7555	1.32043			395.05	117.343	1.21844			1074.69	-75.5758	1.52336			130.986	254.407	0.0718062			1205.73	-379.761	1.33448
	466.686	344.377	1.28925			984.832	-0.11161	1.31554			883.9	-44.097	1.28665			395.094	208.596	0.0528349			465.885	9.02488	1.36781
	677.295	110.407	1.40746			418.312	-159.471	1.40823			527.417	-0.297504	1.3867			396.445	-76.1501	0.0576612			968.484	-360.836	1.51827
	165.516	-94.9059	1.4615			294.746	10.0154	1.29633			1094.56	246.362	1.36666			384.371	121.092	0.0491152			1122.21	51.3324	1.31134
	605.839	287.41	1.18746			389.888	-70.9754	1.20605			853.042	15.5006	1.1442			705.442	120.603	0.0505013			1062.16	-374.328	1.49835
	700.575	75.1563	1.30231			1099.51	46.3896	1.49674			509.086	17.139	1.15479			350.299	216.847	0.0522448			987.742	-399.027	1.29991
	415.964	336.753	1.49986			1059.44	-107.891	1.29975			515.267	265.039	1.17084			364.147	143.695	0.0527994			1219.68	-399.062	1.46996
	625.595	337.038	1.2243			705.903	126.18	1.45277			696.76	31.0918	1.25033			152.026	117.774	0.058003			943.009	-384.143	1.25138
	713.388	146.947	1.33907			816.613	-302.951	1.55809			559.423	-31.6517	1.05256			230.186	449.238	0.0500082			963.126	-374.7	1.55009
	719.852	318.305	1.09298			1030.37	-291.199	1.46781			191.195	94.9554	1.23251			627.871	-37.8921	0.0427765			964.448	-392.513	1.46871
	12.4624	162.53	1.27133			711.534	-169.431	1.38396			859.888	-62.4857	1.23624			208.1	244.982	0.0467156			1259.92	77.6782	1.65072
	519.369	282.715	1.32028			1096.86	-258.758	1.56801			454.681	18.514	1.25256			434.65	433.125	0.0375552			1163.13	-377.5	1.43313
	623.645	43.821	1.43546			532.385	-100.676	1.17298			1086.28	251.929	1.23229			169.129	141.383	0.0471861			951.959	-390.146	1.36183
	528.261	-41.9059	1.27751			596.466	-132.838	1.1545			387.435	18.8411	1.12542			147.215	-193.08	0.042888			462.119	-16.2655	1.30398
	642.895	266.058	1.13011			930.581	-68.5063	1.51968			765.992	121.651	1.4915			-52.5965	-188.136	0.0563611			1028.79	-392.984	1.46912
	389.796	-52.2204	1.24505			559.059	-127.723	1.22744			664.784	-150.103	1.30175			1117.17	-99.8623	0.645958			1116.67	-377.657	1.39285
	400.17	217.129	1.13318			919.989	291.73	1.34499			489.572	-22.2188	1.14298			926.429	288.373	0.720983			1037.87	-402.803	1.28603
	786.258	-14.2973	1.4342			767.211	13.8069	1.36509			1052.64	60.1552	1.15771			84.542	-332.114	0.755417			1052.16	-375.377	1.50361
	-29.1666	480.956	1.10105			626.64	-82.4929	1.2047			726.934	9.31484	1.13998			1093.33	-19.5366	0.683195			969.799	-246.576	1.7053
	2.36824	-46.0086	1.12456			863.649	111.291	1.4506			462.766	43.8129	1.19947			1181.61	-200.431	0.516452			1188.62	-372.347	1.26558
	174.314	294.512	1.07118			747.812	-64.5807	1.38842			1001.51	-157.096	1.4129			88.9394	-295.358	0.783191			1084.82	-361.862	1.29431
	518.454	284.513	1.43523			535.067	-90.0753	1.22542			590.49	-25.1679	1.22399			577.229	170.693	0.709219			583.421	80.7524	1.4767
	381.145	44.8335	1.21102			1177.2	-61.1364	1.51501			514.963	-50.9796	1.16611			390.769	225.267	0.7428			572.092	20.0929	1.40291
	605.478	165.083	1.1612			424.143	28.636	1.25958			583.219	26.6371	1.31465			598.954	-319.456	0.540599			1182.17	-388.778	1.5789
	136.801	-79.5267	1.53694			763.949	-86.7105	1.19149			396.706	9.42951	1.31594			1075.49	-203.938	0.491465			1021.16	-358.606	1.33854
	437.315	80.2019	1.32012			745.507	-109.508	1.31295			993.97	-377.586	1.87103			1192.26	-40.2925	0.501797			1120.02	-392.649	1.4887
	255.652	-18.5568	1.57471			515.665	-72.9672	1.27381			460.055	34.4322	1.16775			504.957	265.573	0.652898			302.015	99.6648	1.45204
	778.974	188.433	1.14447			1045.26	84.8893	1.4862			1029.05	-46.2415	1.55181			549.337	-65.4301	0.974722			516.522	26.5392	1.36259
	431.586	306.13	1.25746			504.075	-115.123	1.18732			959.712	-59.0753	1.63314			374.408	-254.502	0.549037			936.934	61.5547	1.54155
	26.8872	225.586	1.77152			953.09	9.0938	1.39908			504.41	-4.78163	1.19306			1139.7	266.162	0.511118			739.629	-247.621	1.12202
	408.405	195.975	1.31061			1021.48	-85.3465	1.3758			645.267	36.6091	1.20979			1056.43	-204.371	0.466383			1015.78	-376.273	1.4435
	293.728	-237.02	2.26588			1013.26	-140.617	1.32041			857.148	-59.1478	1.34869			462.395	-150.477	0.716465			828.451	36.0966	1.58203
	267.002	212.679	1.30404			386.244	-36.2834	1.38046			1015.12	12.0804	1.20546			998.672	-150.247	0.557141			1082.4	-375.667	1.44695
	236.466	-6.41475	1.5853			999.956	40.4838	1.38742			674.054	-170.71	1.42197			656.17	-163.921	0.63032			992.161	-357.427	1.38523
	631.009	146.412	1.17662			937.08	66.5881	1.5072			758.913	53.5713	1.20633			526.895	-318.982	0.724657			1188.12	-402.274	1.41219
	-187.557	447.237	1.28141			1208.03	-197.098	1.71521			1060.01	146.506	1.08842			506.632	86.5945	0.778479			1105.63	-391.116	1.43787
	716.201	147.434	1.47294			1116.69	-283.241	1.32791			1000.02	192.673	1.3589			461.026	212.497	0.625134			1047.94	-388.07	1.4439
	-130.829	336.99	1.16285			427.774	-9.66068	1.34847			742.467	28.8498	1.22761			410.722	-115.65	0.667241			986.595	-386.478	1.51181
	329.546	-52.9304	1.50389			573.503	-67.7995	1.20422			650.617	-0.0766092	1.14772			258.768	205.372	0.720759			1242.74	-403.285	1.33899
	400.55	178.191	1.31257			890.161	25.9869	1.36793			1087.47	16.1472	1.65891			254.474	216.728	0.721763			1041.69	-365.91	1.39588
	646.794	125.243	1.28866			915.778	53.1395	1.28938			731.439	189.465	0.957883			271.127	-353.685	0.518519			729.969	42.9374	1.32393
	307.884	287.597	1.32751			684.459	-174.124	1.34333			1049.51	57.0614	1.26523			1078.48	140.847	0.569945			608.388	23.4501	1.37472
	404.432	-13.3649	1.44732			969.899	88.8363	1.52965			708.468	-132.908	1.49975			893.535	54.8948	0.630372			672.702	125.11	1.50198
	408.003	-24.0173	1.46968			1198.87	-170.078	1.54003			585.05	-60.9064	1.26983			1074.71	93.423	0.508285			975.897	-394.737	1.35794
	45.7316	-58.4454	1.03333			429.185	-74.1346	1.22567			1051.55	192.797	1.87356			119.48	69.5142	0.798419			1206.99	-396.036	1.47415
	570.259	197.209	1.28727			549.426	-73.9534	1.21941			1029.02	-96.7113	1.41776			348.806	-100.793	0.754665			780.161	28.9669	1.48555
	561.067	67.4778	1.19947			1217.78	0.440055	1.42423			632.581	50.243	1.36439			423.766	203.251	0.629077			510.379	83.8406	1.32816
	556.827	192.107	1.2832			1124	-19.2187	1.4465			841.215	-68.8516	1.37888			1041.59	-204.893	0.563976			1083.51	-393.01	1.33703
	208.188	50.8983	1.10852			932.778	4.57218	1.30369			860.172	-47.4842	1.23641			111.819	332.701	0.784504			974.909	-380.336	1.49113
	463.242	-48.2548	1.32833			511.006	-281.82	1.18386			760.494	-183.647	1.29795			602.873	-164.609	0.630319			1162.6	-395.295	1.48065
	170.141	-61.0622	1.5989			823.755	-89.1717	1.55421			1032.4	-77.9345	1.36249			106.099	385.286	0.723527			1139.39	-388.014	1.41212
	844.594	-38.9119	1.10393			696.579	-226.152	1.3292			561.428	13.8906	1.39418			105.868	-3.78183	0.966542			978.811	160.639	1.82788
	380.858	136.649	1.23999			648.757	-57.4288	1.2118			952.994	-138.237	1.78876			271.319	-148.037	0.676934			1005.59	-388.78	1.38644
	586.859	-204.294	1.44559			924.329	130.05	1.48178			1105.25	227.653	1.35559			282.711	216.567	0.673538			937.852	-240.284	1.6581
	118.45	218.184	1.44814			1098.12	-174.251	1.39536			875.488	33.7865	1.25108			1058.33	170.779	0.50147			229.302	-94.3996	1.04557
	402.396	120.853	1.33863			956.329	20.5387	1.43019			633.506	51.1872	1.23283			896.003	-146.558	0.499491			441.673	8.32598	1.21586
	273.65	320.373	1.56543			715.235	-97.6091	1.37688			983.209	14.4186	1.52582			343.984	-320.55	0.555544			227.7	73.277	0.650354
	469.763	113.222	1.19928			1179.43	-202.614	1.52024			799.61	10.0118	1.31763			1030.82	-204.044	0.515882			-17.0043	-350.023	0.546708
	58.8489	-26.5467	1.67242			416.409	-2.64907	1.36092			1017.41	-57.1589	1.51962			596.423	175.774	0.853112			-127.478	-110.239	1.0025
	436.716	266.583	1.25153			1029.62	26.7867	1.44			758.713	36.079	1.1586			315.923	-21.742	0.680383			930.418	-552.985	1.06398
	524.677	291.016	1.34721			420.785	-132.029	1.30762			793.173	-16.1519	1.22349			516.007	-293.522	0.416923			1146.57	-575.656	1.05897
	327.453	173.319	1.20593			788.678	-78.7664	1.4065			349.502	-42.3507	1.14384			94.3689	-272.462	0.636072			-64.4353	314.237	0.9928
	482.195	7.47086	1.33943			517.261	-5.29507	1.33216			1068.24	-23.9042	1.47498			438.075	209.319	0.629341			117.924	-153.192	1.1299
	284.132	296.431	1.42724			611.461	-175.913	1.26254			808.011	205.178	1.03583			1071.85	92.8933	0.524135			329.653	-308.516	1.05334
	893.165	3.78818	1.32064			704.735	63.4588	1.28784			989.219	-59.0963	1.22153			611.221	32.8411	0.669665			890.696	-547.086	1.04967
	431.912	-1.20641	1.29602			899.28	-231.072	1.39673			1126.35	-52.8032	1.37415			467.67	276.648	0.594104			106.579	419.197	1.10535
	108.909	254.527	1.52693			1198.05	-110.387	1.44363			1092.04	187.971	1.72808			755.245	-149.809	0.531377			309.139	-258.173	1.09299
	349.754	359.549	1.41126			492.964	-52.8233	1.13562			481.688	-12.2796	1.08279			545.831	-299.312	0.462853			-7.25773	206.109	1.02836
	379.475	397.092	1.23217			572.508	-41.4471	1.25491			979.173	-96.9592	1.30208			990.953	-268.437	0.430273			49.7457	240.668	1.23621
	600.637	-31.0872	1.32492			564.829	-76.2072	1.2143			1036.67	-75.7434	1.47342			109.152	318.634	0.695239			139.208	345.711	1.20799
	465.242	225.795	1.37227			504.27	-18.6076	1.2986			984.253	-48.4887	1.20101			596.454	-117.256	0.584668			1031.3	-529.339	1.1913
	39.9952	463.524	1.07937			523.4	26.7267	1.28099			920.494	-285.023	1.62255			96.5839	73.3276	0.675911			871.426	-504.654	1.15905
	539.985	161.194	1.23891			492.463	118.453	1.39696			1124.47	32.2111	1.37892			203.018	161.666	0.651433			725.508	-482.386	1.14336
	371.654	-70.1255	1.38264			533.49	69.5386	1.20871			953.091	-122.219	1.60034			547.552	-287.613	0.449744			69.6287	294.357	1.22143
	621.129	-17.6538	1.48863			1121.37	123.33	1.42922			999.089	31.5222	1.17416			351.9	-90.3802	0.683858			781.826	-401.824	1.22396
	198.851	-16.7783	1.40762			321.172	-135.551	1.32481			589.639	-23.6736	1.30435			741.5	-150.952	0.497979			1169.69	-420.005	1.24335
	126.251	136.317	1.41774			590.967	38.1051	1.23004			236.09	62.3345	1.09387			295.475	18.001	0.764778			153.401	-23.0306	1.14372
	600.742	-28.646	1.3122			534.435	-3.42528	1.31397			1081.52	52.8541	1.21585			272.122	224.59	0.644019			1074.74	-513.327	1.22188
	631.845	59.5825	1.23999			1143.57	-36.511	1.52929			799.676	9.37656	1.14238			1059.29	282.042	0.447934			216.388	420.473	1.0524
	680.726	158.2	1.2807			558.109	-148.6	1.20855			761.14	-182.005	1.43462			848.981	-145.556	0.533673			999.781	-361.197	1.23806
	628.645	145.592	1.27829			1061.86	-252.624	1.23633			999.685	-59.5339	1.17052			105.98	416.167	0.689163			170.541	427.282	1.00946
	389.119	84.2595	1.3768			464.852	25.9525	1.19902			788.603	-62.2056	1.43602			1121.38	94.883	0.451094			1114.49	-443.697	1.3016
	326.39	129.957	1.23288			380.042	-176.67	1.43703			791.13	-68.3253	1.39227			1080.53	-268.888	0.445408			867.221	-369.073	1.18604
	729.152	245.767	1.14188			982.671	56.2577	1.51974			699.49	29.0611	1.23087			441.805	70.2914	0.609408			808.578	-440.832	1.09978
	352.43	356.63	1.34713			1021.67	-170.089	1.32611			859.918	-48.264	1.16963			1017	-204.797	0.483025			692.639	-352.201	1.10644
	443.622	-6.38046	1.42416			887.05	-153.052	1.37392			1072.82	-72.8526	1.45223			347.615	-21.552	0.752008			125.846	390.791	1.11198
	646.612	102.328	1.19699			1169.09	-9.77879	1.55452			938.624	-92.8137	1.45081			247.449	167.357	0.605091			1176.51	-374.063	1.19062
	566.33	-19.0215	1.44897			473.126	-41.6443	1.18087			994.629	138.623	1.45843			666.886	-162.947	0.529259			211.137	-379.91	1.27855
	113.946	-237.746	2.1291			654.488	-88.3859	1.1916			893.898	82.3352	1.50354			1099.82	-101.943	0.488538			977.741	-407.704	1.24465
	-3.50921	180.431	1.82546			1025.61	83.6609	1.40826			464.393	-35.0202	1.26641			232.027	50.0438	0.677128			802.47	-475.953	1.44512
	826.056	168.511	1.17763			563.087	23.8152	1.25862			648.93	0.556895	1.22699			565.654	-291.15	0.432656			199.498	-13.5254	1.12709
	84.8829	-27.0969	1.55129			1001.98	-81.5878	1.34036			1102.8	-31.2698	1.27829			1209.9	-89.1467	0.415299			385.541	-198.429	1.08462
	311.972	355.817	1.68652			409.292	264.72	1.63323			694.407	-26.2644	1.24242			357.619	-23.3185	0.690125			152.675	307.326	1.16895
	256.594	321.489	1.61921			467.623	3.13399	1.33425			356.735	24.6379	1.15739			307.8	-193.11	0.789439			1087.75	-361.106	1.30516
	59.4159	-26.0037	1.57448			929.296	-24.1982	1.54687			808.518	-92.9004	1.16509			391.525	-104.417	0.628121			949.884	-363.636	1.20137
	60.0879	-26.5454	1.44239			909.575	-120.379	1.41949			1008.92	-69.0707	1.35414			268.678	260.426	0.551724			618.747	-242.932	1.10105
	172.748	190.711	1.40589			879.503	-199.117	1.58417			823.857	-91.2045	1.31629			525.187	-284.671	0.428357			278.101	411.307	1.00299
	319.832	16.5975	1.43684			1125.03	-89.3818	1.54112			1034.44	190.477	1.26069			429.6	13.5159	0.716166			152.555	148.661	1.0788
	623.724	-49.914	1.54416			891.902	-127.597	1.34263			1095.61	-37.2691	1.36821			363.865	-188.461	0.602303			180.892	154.039	1.16929
	-8.98311	259.862	1.56996			1104.45	-36.3541	1.43709			894.7	80.7012	1.22278			560.138	349.407	0.541629			1148.35	-342.772	1.30247
	281.373	148.909	1.23489			392.255	21.3683	1.35498			845.176	-80.6224	1.22998			349.14	78.1594	0.634856			242.522	416.592	0.991461
	575.119	162.687	1.481			1224.41	41.2278	1.65392			1015.3	-139.628	1.28417			173.628	-140.633	0.636476			1027.77	-361.629	1.13069
	123.126	196.382	1.30973			953.835	-181.336	1.31574			1038.82	29.436	1.02463			828.842	-149.019	0.494389			1185.56	-313.171	1.09181
	322.669	227.027	1.39347			1225.45	98.4357	1.47708			679.178	-148.391	1.03338			453.077	41.5232	0.516125			972.321	-307.722	1.20497
	14.5968	3.31539	1.31196			956.917	-104.65	1.34757			984.069	-54.8278	1.25254			367.506	-177.5	0.531848			862.206	-298.433	1.17661
	525.461	180.229	1.23019			954.689	-83.1872	1.39353			881.041	55.5913	1.18164			993.694	-280.947	0.353712			185.23	293.042	1.1219
	157.529	-38.0828	1.98542			1098.85	-25.4301	1.61542			897.563	151.906	1.25848			476.11	233.086	0.584343			923.078	-276.28	1.106
	370.396	-256.874	1.97365			367.586	-14.6509	1.2377			875.129	36.6371	1.52758			1018.33	-99.849	0.414813			802.359	-305.143	1.08542
	398.409	-15.7822	1.35009			1011.3	-0.494281	1.37005			858.203	-60.5264	1.02504			251.567	-11.1165	0.638238			401.409	-261.818	1.27168
	494.143	41.1523	1.27456			852.507	-242.015	1.20743			1035.44	-95.7173	1.2958			755.944	11.8953	0.592495			727.588	-212.09	1.11816
	550.828	-2.33252	1.25014			687.895	-1.57449	1.28963			1098.51	-47.0201	1.81316			597.407	33.5168	0.525751			1195.96	-243.126	1.28085
	325.576	136.983	1.17074			264.692	-33.5412	1.12426			1098.79	2.68547	1.55891			555.112	-120.258	0.537261			621.28	-229.526	1.09288
	479.148	102.594	1.30333			583.63	63.3042	1.42533			626.685	-343.87	1.28896			524.247	366.353	0.50624			811.578	-212.312	1.07947
	18.6884	-29.557	1.33659			861.435	-116.174	1.45169			683.447	-155.033	1.20035			964.153	-266.071	0.407676			249.549	312.452	1.16923
	181.239	92.4099	1.59026			679.477	-68.1624	1.23394			280.921	225.326	0.218264			380.344	-93.0636	0.744362			1022.3	-285.43	1.11124
	375.91	352.825	1.41815			919.89	-112.015	1.53156			666.501	159.21	1.41993			770.991	-147.304	0.546792			220.162	108.869	1.04871
	69.2284	29.7218	1.45255			698.631	18.0938	1.34731			756.92	260.299	1.22608			524.877	-115.667	0.540495			239.514	323.234	1.15361
	53.2333	-53.4393	1.30268			573.374	-110.876	1.17993			304.194	27.656	1.1329			456.943	246.642	0.540219			764.759	-257.822	1.10116
	377.554	138.596	1.43807			1029.47	6.98845	1.30647			927.608	225.659	1.68254			353.9	14.9816	0.609267			347.514	240.786	1.08146
	133.672	100.858	1.80039			971.56	70.1953	1.60925			1254.83	162.087	1.53556			604.836	-100.071	0.893258			331.712	313.633	1.07241
	188.829	-55.6621	1.60659			583.778	-108.099	1.27601			380.342	-138.898	1.25877			330.298	-22.0601	0.513553			704.481	-227.761	1.11681
	100.141	287.172	1.79754			1047.36	44.1897	1.29111			588.59	-61.041	1.1797			1093.73	-261.392	0.366956			842.752	-180.267	1.22273
	141.052	188.522	1.65029			718.659	-159.406	1.47278			394.511	67.156	1.17659			939.041	-148.341	0.373435			1001.28	-219.473	1.1196
	489.426	3.94339	1.42165			990.025	-47.627	1.35756			934.351	263.17	1.5615			327.321	-198.481	0.526598			387.506	395.059	1.00438
	583.125	-7.85902	1.62934			468.894	-73.6596	1.28946			1089.99	331.307	1.51378			958.227	-150.208	0.355355			981.352	-215.723	1.16908
	342.949	-22.7352	1.42881			1058.5	2.29636	1.34195			1235.52	62.924	1.65755			80.2588	7.08559	0.726063			483.521	380.799	1.0467
	-27.8335	99.447	1.228			708.048	30.9328	1.36647			327.08	247.153	1.30711			88.1354	-242.739	0.457187			517.982	375.681	0.982
	243.087	192.521	1.29082			727.867	-44.2735	1.19645			1298.7	71.938	1.46308			236.117	-11.0932	0.572969			979.913	-197.945	1.25015
	729.086	114.252	1.24519			905.079	28.0538	1.32528			276.86	77.054	1.1921			252.502	276.316	0.48549			437.502	365.019	1.14431
	184.126	216.236	1.40113			654.172	-6.51505	1.23704			708.952	-17.937	1.47882			281.578	-345.089	0.379085			1180.68	-206.214	1.30505
	319.583	46.3521	1.25977			689.794	-30.2488	1.3245			861.69	182.099	1.36249			582.087	-104.238	0.522117			1011.22	-213.162	1.15885
	111.958	102.504	1.46205			996.396	-16.2518	1.71729			513.761	114.753	1.11809			828.035	-195.019	0.413279			886.784	-188.692	1.20257
	234.811	-19.5419	1.2953			1118.31	-41.4713	1.52288			609.527	240.455	1.35358			228.671	132.506	0.544658			267.561	122.691	1.05354
	577.929	108.35	1.17423			593.292	-84.5394	1.33623			347.786	67.095	1.69167			217.8	385.444	0.470892			288.796	360.313	1.07594
	303.6	225.546	1.27278			1151.43	-108.314	1.35867			1001.13	180.417	1.2347			994.1	-101.874	0.387175			367.529	312.603	1.11264
	58.5204	122.534	2.01376			797.189	-43.74	1.25295			1161.66	501.411	1.68671			214.368	402.104	0.47641			343.685	390.089	1.03757
	195.852	180.845	1.56173			1194.24	1.31257	1.42903			755.163	191.389	1.52627			512.406	-172.513	0.429912			259.087	-10.6383	1.0747
	206.394	-13.5701	1.34002			845.331	-70.1657	1.45839			1298.7	123.324	1.7203			116.349	-104.361	0.482292			1108.49	-206.682	1.15868
	748.905	-20.3993	1.31696			1211.19	-38.1074	1.51675			320.432	-45.847	1.10578			372.712	18.3977	0.535184			562.511	-111.681	1.05122
	284.25	295.908	1.37808			885.375	-1.01228	1.25323			770.896	134.821	1.18105			93.8904	-28.1547	0.550288			362.149	-266.887	1.41337
	940.908	-238.258	1.2071			803.423	-174.561	1.3745			341.693	299.855	1.15759			330.246	17.6288	0.486189			503.022	377.902	1.02361
	657.596	17.0716	1.39819			763.624	-174.411	1.40625			991.865	-66.667	1.52585			201.311	378.91	0.448828			335.773	379.495	1.09733
	87.9988	58.337	1.58374			573.194	-6.09321	1.19603			616.903	-100.563	1.29924			787.696	-99.4803	0.538527			454.167	-64.4772	1.0911
	281.981	241.25	1.30159			596.139	-52.681	1.26436			854.199	63.25	1.53226			635.422	-165.333	0.378174			686.315	-160.853	1.06836
	266.498	343.122	1.43029			867.836	-161.976	1.27397			352.353	56.433	1.43653			595.883	-296.813	0.367038			1204.18	-187.78	1.1049
	176.691	180.985	1.48182			459.719	-135.845	1.30546			964.164	286.102	1.1536			465.937	-195.274	0.39233			500.023	358.632	1.13258
	361.167	76.8511	1.27945			1058.72	-7.35496	1.39725			484.98	-17.701	1.19577			204.19	360.784	0.438306			306.764	210.347	1.12509
	118.812	75.6539	1.45123			1144.82	9.48223	1.32757			509.831	124.956	1.09885			230.716	404.709	0.464717			935.371	-207.792	1.07476
	480.388	4.00842	1.45742			1078.13	-52.144	1.55323			1046.5	-156.235	1.33423			178.309	32.2308	0.473321			291.457	376.713	1.09868
	356.504	-20.0208	1.58099			967.626	33.3289	1.44963			573.113	-48.881	1.36612			392.702	73.1892	0.421418			465.246	217.187	1.15016
	0.466672	268.711	1.60037			1095.71	91.0764	1.46332			1066.75	-203.01	1.47802			310.486	-334.465	0.397366			470.318	322.211	1.06147
	71.2325	147.032	1.74368			1182.53	123.082	1.44796			259.6	-64.893	1.23108			323.044	123.731	0.461085			482.316	10.3333	1.12839
	511.782	92.0785	1.2781			706.543	9.34423	1.26966			1110.59	343.102	1.47576			838.301	116.297	0.44267			416.661	373.074	1.06536
	560.176	-11.608	1.71523			780.609	-140.589	1.43289			982.18	193.839	1.42563			142.017	-46.4925	0.570586			1207.04	-168.507	1.25123
	650.483	-102.495	1.42826			591.846	-10.8372	1.26893			339.413	299.016	1.11401			467.43	369.984	0.398532			426.308	344.597	1.08205
	547.762	24.9568	1.32862			514.257	-38.4579	1.23395			1185.56	286.158	1.55502			216.813	423.26	0.447951			531.087	217.777	1.18002
	159.234	-19.1826	1.49364			1015.95	-63.5635	1.4811			1016.88	342.148	1.47739			627.817	-283.597	0.296445			360.053	20.4716	1.08949
	553.675	-3.66019	1.44732			1080.88	-32.0862	1.30711			315.934	-45.512	1.00853			843.624	-198.32	0.311465			331.679	237.623	1.04773
	453.618	139.301	1.18202			997.663	-26.5176	1.47815			594.482	163.113	1.41255			1008.32	-270.296	0.279912			519.764	272.008	1.07059
	63.3241	113.097	1.75586			777.198	-40.0783	1.21757			621.719	61.983	1.08376			318.361	-325.175	0.347963			703.139	348.181	1.04844
	580.873	-75.4674	1.5593			810.928	-35.046	1.2195			395.595	75.812	1.12658			530.745	-305.748	0.299693			486.739	380.321	0.939144
	441.832	234.162	1.22518			1131.38	3.8671	1.36941			1112.44	214.362	1.48297			213.102	-60.7057	0.34872			761.521	-183.739	1.11713
	143.385	35.4418	1.75064			1112.28	-16.6791	1.46866			785.759	185.178	1.39545			912.886	-198.045	0.335764			537.45	361.887	1.02026
	61.1698	55.1428	1.30405			748.201	-0.111911	1.38448			689.575	187.906	1.18124			633.99	-166.335	0.309354			486.193	164.365	1.05794
	30.2832	252.241	1.73324			639.86	23.8425	1.22423			947.921	220.987	1.32434			1084.51	-103.461	0.322465			465.307	-68.833	1.07614
	789.391	-47.6265	1.54496			1090.19	21.5605	1.3638			329.65	-77.237	1.09802			802.739	-147.84	0.329892			466.538	-108.822	0.993781
	446.412	45.5948	1.44279			772.443	32.277	1.34293			710.019	223.641	1.32566			116.583	-38.5354	0.52485			506.217	-20.7795	1.07841
	618.401	127.258	1.31912			757.969	31.2821	1.26918			1155.5	285.887	1.20809			340.274	-138.239	0.340227			325.378	209.392	1.09341
	332.068	-46.1897	1.44417			866.22	67.6506	1.22582			533.736	313.499	1.11976			850.218	52.005	0.357602			387.65	-56.9081	1.04072
	194.688	253.041	1.32474			700.396	-55.2357	1.1603			1196.98	199.086	1.5543			732.77	-228.493	0.292086			687.43	-90.3641	1.15479
	40.8304	68.0826	1.49656			522.329	-31.1322	1.18977			475.272	126.712	1.18959			730.938	235.023	0.280628			555.385	327.27	1.12476
	529.517	-17.2555	1.42329			588.546	16.3222	1.19465			460.291	-49.35	1.1489			617.833	-261.19	0.261597			506.819	126.281	1.09912
	479.267	102.936	1.34022			813.047	-2.48361	1.33808			932.25	179.288	1.37154			116.961	-122.064	0.321661			318.168	254.768	1.0292
	823.238	167.031	1.28008			842.173	52.0161	1.32497			387.517	-78.966	1.12328			893.847	-174.221	0.287679			607.971	-62.0972	1.04055
	606.184	157.562	1.41398			771.079	44.4923	1.2956			1152.37	239.332	1.73371			198.278	346.649	0.344107			583.826	347.675	1.09491
	-55.8998	95.8904	1.18636			924.557	-38.5574	1.47788			505.728	322.164	1.10895			635.398	253.603	0.318415			370.016	230.968	1.06833
	361.534	109.648	1.33593			984.7	-9.16912	1.39363			324.999	-14.305	0.987619			1214.12	-35.7061	0.234743			335.857	281.915	1.07965
	191.926	147.624	1.65061			861.116	-209.367	1.42352			974.478	135.582	1.56393			1094.12	-207.882	0.272504			947.467	-121.523	1.13864
	52.2742	82.0801	1.47858			771.373	-25.0667	1.43533			1275.33	198.145	1.5432			804.198	201.56	0.278587			410.008	41.4626	1.06582
	103.14	136.795	1.51276			911.487	261.226	1.39037			425.782	10.447	1.1176			286.738	-286.218	0.273738			497.143	295.703	1.13118
	524.206	145.604	1.38488			841.296	36.8164	1.35871			1155.03	197.962	1.45015			686.855	-186.215	0.259896			942.438	-105.495	1.13117
	142.528	-13.3059	1.36596			812.301	8.29155	1.28856			668.671	-99.564	1.42627			590.766	101.444	0.325017			591.508	-77.4746	0.989765
	283.51	72.3486	1.31754			1154.89	116.315	1.61752			1173.32	372.67	1.91327			147.111	309.168	0.344078			582.127	59.5836	1.10628
	761.308	74.4851	1.16874			719.529	153.77	1.40462			1141.5	-242.627	1.46705			619.328	337.598	0.32805			767.371	338.642	1.14608
	144.195	144.163	1.48337			480.435	4.28599	1.20361			1142.04	268.539	1.43327			201.609	329.08	0.28842			452.17	17.8292	1.04186
	-16.6124	205.077	1.55076			679.831	-39.3031	1.25774			570.577	171.751	1.26201			524.775	466.783	0.25786			560.191	356.234	1.0491
	256.922	-68.4205	1.86892			916.6	-161.253	1.47179			857.048	-48.952	1.35009			697.621	393.936	0.233589			574.52	-54.253	1.03971
	205.333	139.565	1.55997			1079.91	-310.763	1.3694			334.158	0.421997	1.20352			449.061	-303.388	0.272418			506.423	276.779	1.05554
	237.875	164.545	1.25194			948.366	-35.4303	1.4012			813.331	-150.647	1.08864			231.813	375.087	0.288241			540.811	306.673	1.12691
	379.298	-82.2082	1.3911			1135.54	120.458	1.35167			740.81	170.074	1.38176			1057.17	-103.454	0.240532			881.243	-227.936	1.43567
	277.322	-19.1362	1.55789			1188.12	59.7178	1.57892			509.746	329.888	1.15337			212.107	339.398	0.281824			520.291	191.177	1.04819
	209.014	-79.6873	1.46026			672.845	-0.550922	1.22775			774.129	-212.257	1.14779			101.27	157.051	0.291514			512.284	154.778	1.05385
	142.901	35.2449	1.67767			1081.84	-177.294	1.47492			656.703	-99.952	1.52716			1024.04	15.4911	0.224652			969.707	-106.209	1.22078
	354.287	4.31808	1.54211			898.677	-26.2169	1.25905			522.297	-113.368	1.24322			137.735	289.52	0.280632			380.581	71.9343	1.07579
	621.976	-52.2122	1.28513			730.211	-7.17172	1.27705			912.548	302.169	1.34454			551.229	-201.671	0.271126			159.979	37.9365	1.50616
	157.559	228.172	1.44426			1172.37	-24.1161	1.42942			617.18	16.658	1.25271			116.491	176.486	0.302041			534.544	156.316	1.06167
	96.4314	24.9758	1.5915			1002.3	-173.128	1.69542			1201.37	-251.3	1.63585			244.566	330.913	0.281507			1200.08	-129.479	1.12617
	309.58	-90.6769	1.5269			411.388	-48.3556	1.14788			1185.85	-42.72	1.65033			770.741	317.448	0.212518			503.642	340.906	1.08827
	505.36	9.84424	1.69366			1197.7	-19.5016	1.29674			499.498	-92.651	1.13285			733.117	342.295	0.211498			731.653	289.876	1.11269
	202.816	-60.247	1.72951			794.328	26.8074	1.24863			479.221	-130.764	1.30729			734.349	369.352	0.217046			949.313	-65.877	1.09909
	142.114	72.2695	1.39609			726.867	-25.8225	1.33971			560.934	57.724	1.38142			193.559	355.94	0.26226			968.914	-144.265	1.13904
	93.6132	-38.4436	1.74543			553.309	-4.93684	1.32818			810.103	16.77	1.42494			1007.31	-44.4858	0.214867			1007.77	-98.9007	1.10133
	49.103	109.435	1.67129			880.227	-36.0897	1.34058			1198.34	200.674	1.50615			246.242	356.088	0.260255			591.795	268.18	1.12136
	552.88	73.6505	1.20552			716.625	-20.4333	1.3433			684.075	-51.793	1.26972			550.907	406.451	0.220514			1196.06	-94.135	1.14346
	474.295	153.059	1.20141			1018.21	-38.3754	1.32387			524.311	205.639	1.17994			349.688	274.984	0.237734			656.665	272.912	1.18225
	409.389	62.4025	1.45446			1030.42	-26.317	1.31117			361.819	-11.748	1.05184			567.037	422.029	0.237631			344.674	378.095	1.0421
	283.343	-2.72391	1.30015			626.866	7.25324	1.27204			1063.95	191.368	1.37594			533.47	410.977	0.224141			560.422	181.784	1.09255
	453.957	198.215	1.09505			633.653	-38.0788	1.37904			1057.02	162.408	1.46513			124.913	262.443	0.254691			697.236	349.058	1.00072
	445.571	110.572	1.29727			459.656	-107.941	1.32525			521.668	146.255	0.978714			545.595	455.251	0.223458			288.702	163.412	0.999467
	127.919	224.974	1.55527			836.005	-27.9158	1.45488			587.03	-62.104	1.19774			293.647	284.564	0.249986			425.046	294.269	1.09332
	392.358	204.033	1.2541			1057.85	-42.436	1.50945			872.933	75.998	1.23397			675.859	-124.556	0.23119			1212.22	-77.733	1.12712
	148.306	-4.91001	1.41016			832.79	-54.1255	1.44408			595.9	108.96	1.33459			548.91	430.992	0.210207			546.548	186.339	1.13209
	281.898	-18.2356	1.54853			830.448	17.7523	1.17696			803.291	237.24	1.4968			712.445	378.178	0.223814			499.456	-16.7677	1.06072
	657.779	156.753	1.27279			71.918	-15.7638	1.49877			495.432	53.405	1.20488			259.955	-287.363	0.228845			724.354	345.031	1.03579
	219.017	332.009	1.64335			296.859	-180.889	1.52493			392.265	-101.061	1.08567			358.43	283.76	0.251479			440.704	280.23	1.08369
	100.544	-92.8707	1.42193			341.535	-42.411	1.41724			1093.12	-213.479	1.74388			84.6678	173.038	0.264393			541.344	277.631	1.14673
	562.322	119.949	1.44666			268.897	-129.877	1.55309			1170.96	181.726	1.48345			720.549	352.761	0.195843			1169.37	8.93697	1.1496
	417.236	-25.075	1.25653			196.804	-134.131	1.48244			479.234	-26.793	1.26788			763.097	336.392	0.181264			725.579	344.848	1.06108
	88.76	-40.9727	1.5516			647.746	-90.6188	1.35826			990.718	315.951	1.43713			339.258	259.485	0.239732			285.98	-87.8123	1.20979
	441.356	-194.318	1.48803			398.587	-66.9703	1.35412			359.159	-14.104	1.06757			230.53	346.084	0.242049			555.38	291.307	1.05812
	-10.615	48.5522	1.1682			180.123	-204.957	1.45561			1182	82.285	1.39338			286.782	300.709	0.218704			748.625	-81.2926	1.13545
	157.857	192.588	1.43614			125.612	93.6454	1.48167			971.173	-19.624	1.28975			67.2197	76.9629	0.242654			894.965	-38.5372	1.18126
	287.472	293.489	1.452			234.379	-88.3502	1.35957			1021.16	296.225	1.57741			321.754	265.901	0.231436			613.45	187.965	1.11149
	235.218	161.458	1.07443			277.483	-76.9098	1.47813			1062.12	-50.218	1.39748			591.72	-183.875	0.186041			716.373	-195.224	1.40718
	395.175	103.517	1.15622			251.899	-208.423	1.41325			906.501	180.766	1.38157			571.196	47.5761	0.227324			1080.43	-97.9043	1.09382
	571.683	42.7656	1.28709			457.195	-204.826	1.41625			1157.83	162.193	1.60598			991.571	-207.644	0.179498			526.225	322.559	1.04973
	342.004	-52.498	1.66436			258.054	-11.445	1.44284			436.083	-103.742	1.23979			359.583	254.099	0.227156			1169.83	-55.137	1.11266
	357.66	8.74439	1.37277			627.323	-60.4431	1.28863			1190.12	158.692	1.44014			492.545	403.306	0.191894			912.862	317.033	1.15323
	196.834	318.656	1.52596			353.406	-275.335	1.32818			598.918	229.874	1.29922			749.833	348.386	0.202542			504.102	128.18	1.07544
	466.389	100.618	1.32795			138.347	-139.936	1.5235			902.615	-153.427	1.35614			576.223	-198.908	0.181737			673.508	-0.323889	1.09093
	274.726	130.024	1.57173			482.838	-131.799	1.36241			521.372	145.997	1.07829			919.957	-173.507	0.190356			586.697	333.971	1.0532
	218.692	332.168	1.76248			170.756	-191.143	1.56524			727.877	179.921	1.3806			1177.04	-61.574	0.149709			1225.73	-42.6868	1.12905
	210.174	154.135	1.67444			239.326	-129.918	1.5077			718.919	-35.183	1.31896			882.427	-199.201	0.183766			500.515	258.484	1.0812
	100.646	-23.9574	1.68499			410.106	-132.402	1.35313			1280.57	-134.977	1.77953			126.199	-149.026	0.202356			1098.49	-123.398	1.18783
	479.687	205.169	1.17925			327.545	-46.9966	1.41322			892.213	66.252	1.41308			199.468	296.709	0.254544			546.742	-8.90921	1.02179
	103.563	158.498	1.3231			197.893	-51.0055	1.56317			1200.8	-146.035	1.4466			103.568	221.099	0.189646			516.974	3.46225	1.04567
	9.41818	274.666	1.52403			381.612	-112.262	1.33704			1254	42.769	1.24896			1164.8	-31.679	0.154119			750.85	294.947	1.19274
	511.658	288.034	1.32347			457.266	-105.52	1.42053			1153.59	55.596	1.62105			331.828	289.98	0.202817			1127.88	-12.861	1.19265
	-1.01765	175.336	1.61093			186.694	-150.464	1.71382			484.553	-50.916	1.08893			627.02	399.617	0.170327			239.955	42.5647	1.3245
	605.755	159.327	1.53536			343.307	-89.6352	1.36896			696.382	-142.252	1.18436			310.702	158.646	0.179666			613.757	312.257	1.14745
	61.9614	143.348	1.58304			147.642	-45.7027	1.29361			1104	119.392	1.62217			686.959	1.11862	0.163658			1213.05	-40.6959	1.24973
	216.956	91.7079	1.80548			303.923	-86.2285	1.40538			406.537	-48.148	1.29378			940.647	25.2946	0.183241			512.766	25.9069	1.09175
	4.19026	102.301	1.13205			110.08	-28.7149	1.35002			577.924	-87.897	1.24932			601.96	-6.89825	0.163752			1105.87	288.368	1.12905
	107.39	125.24	1.53437			337.951	-261.567	1.42243			729.086	149.164	1.35534			240.641	140.879	0.18818			1053.74	86.2115	1.19173
	44.5955	143.789	1.7312			451.354	-27.9967	1.61736			939.647	378.205	1.20463			701.169	-12.8285	0.192875			1122.26	-48.8561	1.16498
	493.188	41.9395	1.22017			604.847	-85.4928	1.37094			799.691	-56.349	1.4373			201.934	319.519	0.179952			884.086	100.295	1.16366
	219.264	-58.6381	1.484			327.646	-100.165	1.43532			1025.75	-32.196	1.24625			546.596	276.808	0.162381			1056.17	-75.3828	1.21003
	-13.1583	6.56135	1.2019			80.0365	-28.4192	1.48801			639.819	100.621	0.946104			685.006	-212.037	0.167513			1035.61	73.3166	1.12096
	59.7828	59.9122	1.41337			85.259	-95.3546	1.54162			903.824	-149.67	1.35335			706.453	492.591	0.151776			758.292	159.45	1.20182
	290.171	-34.8382	1.58493			97.7894	-25.8317	1.32523			635.732	-118.513	1.20833			737.585	-12.9069	0.134597			875.493	-13.4504	1.14061
	417.931	131.47	1.17418			270.713	-107.405	1.38268			946.541	148.812	1.48547			569.539	-12.8355	0.154983			769.541	-33.2632	1.10101
	8.87852	-4.00235	1.48512			144.244	-69.265	1.52227			614.795	6.384	1.37006			944.384	-57.0545	0.138209			1031.1	9.88559	1.16876
	263.638	2.01816	1.50456			78.6041	-239.484	1.5793			433.608	-35.015	1.62405			638.264	109.811	0.207506			753.571	252.678	1.12357
	144.862	69.3097	1.28149			231.898	-104.692	1.52126			1186.38	-42.817	1.64007			955.776	-188.64	0.125979			607.407	304.568	1.09228
	420.502	17.6482	1.55235			131.837	-35.8448	1.42338			851.149	-14.75	1.37375			754.879	-203.978	0.115371			924.966	307.634	1.13858
	360.629	85.3621	1.39487			457.638	-134.294	1.37987			625.602	19.143	1.3606			866.437	-182.728	0.111189			164.675	85.4177	1.39832
	273.187	33.4341	1.19684			138.22	-58.8634	1.45534			1001.52	8.29599	1.48018			108.712	-127.471	0.222304			1151.12	0.810827	1.17491
	355.892	-23.5759	1.7318			339.932	-115.064	1.37254			456.494	320.931	1.38565			865.945	-167.181	0.103872			279.542	253.557	1.21038
	284.953	141.307	1.24039			267.406	-147.195	1.40015			596.034	32.634	1.20019			574.804	7.30821	0.125313			544.641	11.1683	1.06131
	537.364	0.459268	1.31669			307.992	-231.565	1.4124			680.147	-122.718	1.32552			768.857	-196.795	0.106169			763.445	274.031	1.16818
	527.282	43.2404	1.30241			193.08	-198.783	1.77711			381.441	-137.628	1.01094			501.411	-211.33	0.110295			730.134	236.15	1.09174
	349.531	61.1382	1.4628			390.624	-236.021	1.35781			1184.26	111.747	1.37675			436.636	391.755	0.109762			952.24	-50.2827	1.1643
	418.929	142.531	1.41186			127.07	-87.3122	1.34278			513.021	121.456	1.13372			934.129	-177.397	0.0976463			206.427	-147.572	1.23542
	679.348	0.271363	1.39316			146.157	-167.419	1.6214			843.81	249.43	1.39099			501.918	430.263	0.0939354			1185.8	77.5872	1.18581
	249.391	103.517	1.40861			873.262	-64.4317	1.31615			901.109	154.216	1.3106			789.724	-185.284	0.100035			1031.28	299.446	1.16999
	158.881	-18.9062	1.36617			382.588	-88.561	1.40583			792.077	286.499	1.29051			489.336	427.492	0.0972071			1052.48	-28.5001	1.22254
	183.982	32.4909	1.44123			342.009	-152.017	1.45551			435.552	-26.986	1.27311			687.329	-97.1459	0.130322			644.323	-9.96697	1.06086
	250.353	-79.6719	1.77607			366.876	-99.0083	1.27071			1111.74	-50.941	1.38832			506.389	-199.586	0.097226			567.071	200.012	1.0811
	433.486	-1.88748	1.46394			133.416	-75.9366	1.41291			1129.35	260.674	1.75258			464.729	362.019	0.0983234			688.995	307.985	1.10774
	-6.15494	217.098	1.95607			764.144	-144.215	1.37745			669.207	-97.273	1.29253			653.743	-1.12434	0.105087			680.229	259.454	1.14535
	25.1842	132.771	1.45943			589.766	-101.321	1.32359			1046.8	197.006	1.80292			1127.54	-164.565	0.0722367			735.436	316.605	1.19416
	391.765	-50.8577	1.27524			175.758	-111.318	1.60009			254.74	66.021	1.04568			524.221	-203.301	0.0815247			1055.06	295.915	1.14133
	288.813	-36.4587	1.38343			199.969	-245.081	1.44315			471.075	83.563	1.13618			264.701	310.431	0.0881736			999.279	-37.4843	1.18213
	361.345	106.586	1.22554			280.039	-173.78	1.41918			1180.81	79.8	1.218			534.473	39.6165	0.0533349			619.16	213.766	1.10758
	158.705	-21.3826	1.26878			716.679	-89.4958	1.27756			258.21	-67.8	1.18593			530.439	48.8383	0.0459164			1177.85	161.716	1.1962
	266.256	250.746	1.39567			237.085	-171.186	1.44431			963.88	285.693	1.40721			899.914	209.913	0.0313762			1226.24	141.724	1.27279
	97.2451	25.6243	1.54374			292.565	-112.421	1.43031			276.38	-30.423	1.20604			425.474	-307.562	0.0386423			724.03	81.3411	1.09499
	521.108	-2.15025	1.23554			360.331	-211.481	1.45443			796.593	-98.273	1.42982			545.458	40.3467	0.0350314			226.854	-90.9241	1.74002
	355.452	-153.724	1.84984			179.603	-94.1898	1.40977			768.487	-188.984	1.11892			551.8	53.5814	0.0371069			1239.33	48.8976	1.22879
	410.84	62.4982	1.60754			209.212	-242.233	1.62076			580.322	-86.952	1.23606			287.991	-244.634	0.0302266			849.689	-62.9002	1.08106
	605.777	157.054	1.52311			473.86	-102.016	1.42579			453.722	164.642	1.20328			552.378	29.9161	0.0316287			859.794	269.661	1.16081
	236.855	-197.619	1.9153			382.07	-155.061	1.40318			530.577	182.553	1.19471			285.832	69.9148	0.0285907			1263.89	214.295	1.28103
	342.768	95.2296	1.43338			125.342	-159.794	1.38023			331.576	-132.983	1.43615			218.24	-61.7692	0.0276227			1105.9	-42.8614	1.21938
	222.258	84.1987	1.53214			146.575	-206.388	1.19783			1244.55	386.389	1.71465			960.461	-173.396	0.633374			977.164	-237.979	1.47447
	159.287	127.239	1.35677			117.768	-195.776	1.55834			1164.65	122.962	1.62932			1149.25	46.3196	0.492451			1036.76	298.632	1.13126
	499.35	81.1731	1.27948			580.693	98.0637	1.562			471.258	49.763	1.08538			71.5847	372.605	0.567128			589.598	34.9509	1.06466
	22.5286	146.962	1.71724			252.784	-31.3153	1.51723			1286.1	121.528	1.71522			457.699	154.453	0.560858			1150.7	215.6	1.27914
	143.78	45.1846	1.38117			489.829	8.08804	1.42834			937.233	128.636	1.0628			951.494	171.547	0.608558			810.414	204.153	1.15658
	-2.25194	51.1769	1.18223			525.888	-434.107	0.562437			1122.42	57.389	1.35854			367.883	157.975	0.581688			1152.83	105.471	1.20019
	-23.425	195.794	1.67021			877.969	-128.468	0.559624			909.897	127.047	1.30573			910.454	-287.652	0.51453			154.53	77.0109	1.77103
	85.115	28.3606	1.46381			985.422	-41.3158	1.31242			650.781	-120.033	1.48742			336.695	332.386	0.495075			763.627	112.611	1.069
	214.629	138.378	1.35182			700.56	-187.529	1.28087			1147.35	-81.574	1.25317			977.747	-144.878	0.516496			791.673	-55.796	1.03552
	323.006	5.41448	1.43962			796.367	-153.313	1.29141			1000.99	177.627	1.43993			1008.99	166.77	0.495132			1231.07	177.504	1.26302
	298.516	95.8107	1.4726			697.353	59.7368	1.23001			433.508	-132.863	1.09982			633.336	-254.016	0.56456			982.505	306.69	1.14509
	741.874	181.248	1.11225			182.102	-1.27242	1.54851			1059.59	-88.084	1.26255			688.089	435.842	0.510204			888.175	221.182	1.17117
	75.3991	132.891	1.52155			552.389	71.2969	1.33649			826.473	-74.478	1.30646			967.544	-194.086	0.536691			658.972	69.9086	1.04917
	372.37	-193.433	1.43918			855.398	-30.367	1.21101			1055.14	250.035	1.60347			634.168	322.819	0.565269			713.609	299.312	1.08207
	255.545	-43.4551	2.02643			746.014	-54.561	1.20688			598.731	337.261	1.27814			908.904	351.794	0.462711			879.595	-0.355026	1.06675
	653.928	15.7668	1.20857			815.015	-156.174	1.29748			354.687	30.554	1.10479			560.617	-243.568	0.606553			829.649	323.232	1.06533
	449.859	45.6873	1.39859			600.583	-137.257	1.29861			1252.49	44.13	1.53781			69.858	-84.3319	0.649159			635.752	212.68	1.05478
	430.915	-1.22232	1.36409			784.718	-166.413	1.3098			703.229	103.916	1.44176			415.125	283.486	0.480637			825.394	193.907	1.16996
	0.35585	-0.455327	1.69492			954.724	-60.7368	1.15314			432.208	-36.136	1.30193			360.223	-286.743	0.622646			741.174	230.146	1.12743
	102.467	-22.284	1.34132			789.035	-100.146	1.29558			732.771	85.178	1.40991			899.986	-150.718	0.598162			1249.85	119.743	1.20058
	90.6266	57.3689	1.47128			371.302	-230.894	1.47621			914.333	196.437	1.3792			848.63	-197.396	0.500868			1127.67	50.8966	1.1213
	477.048	204.174	1.13865			474.012	-271.429	1.26118			718.68	98.372	1.43245			177.487	-71.6236	1.41152			257.963	230.124	1.20343
	24.279	156.358	1.91103			10.3823	20.9563	1.56765			478.571	31.605	1.07676			763.597	-200.829	0.520402			1194.08	111.704	1.18404
	433.94	-3.16563	1.26195			573.113	-208.459	1.46816			1063.47	-45.093	1.37484			61.1211	2.85228	0.771411			748.443	155.335	1.11033
	461.562	-124.734	1.61275			739.625	-138.051	1.20648			1185.47	-117.8	1.35316			482.373	82.2863	0.525121			967.965	201.826	1.19446
	313.332	89.9555	1.37017			567.57	35.1244	1.33888			1213.19	-104.068	1.45325			1073.53	-257.317	0.485788			1105.17	113.014	1.24186
	64.5178	138.867	1.66628			30.1501	-301.011	1.50181			797.312	-96.514	1.39039			543.723	80.9387	0.582102			645.559	25.1767	1.00579
	165.86	126.035	1.42242			597.806	-76.3332	1.21627			1008.06	233.307	1.77172			767.448	-228.637	0.681638			853.204	240.843	1.12463
	465.302	223.188	1.29174			684.98	-208.55	1.28881			658.968	33.409	1.17021			110.982	-184.881	0.591987			794.196	242.24	1.09033
	561.32	119.096	1.51907			712.646	-119.57	1.24428			1170.88	101.775	1.41869			7.92928	-38.3285	0.580067			381.703	-2.79533	1.1712
	556.554	-103.283	1.38309			294.024	-219.136	1.45984			756.497	-43.633	1.13892			61.2908	-277.936	0.652843			1008.4	-23.0232	1.15251
	197.55	179.769	1.59443			611.403	-116.405	1.28951			1142.2	24.977	1.29743			68.6296	-74.3644	0.702325			1078.81	257.898	1.2302
	676.951	-16.6002	1.34944			415.218	-183.706	1.35191			863.903	24.984	1.35284			836.473	-21.5459	0.554899			1249.01	182.797	1.1917
	-12.0364	154.383	1.15693			886.984	-11.2733	1.12458			342.795	-32.089	1.14918			363.051	-134.633	0.592288			746.307	280.992	1.13644
	558.484	117.288	1.39636			505.807	-93.7218	1.31132			804.047	159.421	1.46807			504.061	82.263	0.521834			1196.52	161.471	1.21138
	459.791	114.344	1.29685			270.142	31.9165	1.39584			681.846	-121.282	1.24818			151.868	-290.124	0.989433			680.77	246.209	1.06576
	49.0116	143.234	1.44839			815.318	-97.7045	1.24071			967.951	33.936	1.14991			55.6749	-325.139	0.59909			922.048	218.108	1.1912
	261.023	8.06228	1.49404			98.9457	102.883	1.56561			974.613	57.813	1.45412			140.711	-199.716	0.518819			736.543	202.666	1.16662
	101.136	111.014	1.4624			302.565	-296.576	1.44666			1026.8	53.369	1.22815			108.31	-255.153	0.588343			777.483	324.058	1.07629
	-12.8959	107.725	1.18974			198.778	-207.544	1.48727			585.748	69.198	1.27942			380.734	307.52	0.388235			679.708	81.9135	1.08614
	624.021	-16.1714	1.69497			651.697	-150.436	1.29597			781.839	96.92	1.378			377.676	292.748	0.41635			861.332	198.113	1.18228
	73.7593	-56.1089	1.48954			283.983	6.04369	1.47654			822.859	99.894	1.44437			1247.77	-94.6755	0.354362			227.862	54.0447	1.26437
	258.078	78.3659	1.33678			811.539	-4.63057	1.20726			675.221	50.395	1.23642			81.6981	138.307	0.575445			892.419	296.42	1.20706
	141.484	-247.509	2.23222			368.901	-163.252	1.46116			940.041	47.931	1.63392			110.601	-208.581	0.607681			889.718	24.2811	1.07404
	288.423	32.6677	1.53684			188.537	36.1742	1.40703			433.336	-107.495	1.17367			471.495	315.978	0.381305			1028.63	122.719	1.17663
	48.4654	144.422	1.49795			394.937	22.8355	1.46678			656.424	36.242	1.23596			134.693	344.317	0.582302			853.88	142.43	1.11855
	178.144	178.825	1.55875			548.034	-21.7647	1.40397			955.695	-49.979	1.66538			484.589	348.817	0.455714			908.387	279.355	1.17265
	154.577	-245.997	2.23041			399.652	-202.654	1.45972			459.154	-29.328	1.31383			109.775	-113.735	0.493496			1138.03	83.5338	1.15025
	21.8771	146.698	1.92405			232.582	-185.473	1.43072			710.828	12.828	1.20874			611.839	-292.518	0.395245			1028.12	221.467	1.19044
	256.045	-56.1862	1.93362			223.632	-219.135	1.44344			455.981	-48.523	1.19867			805.75	326.225	0.431136			666.751	249.458	1.08555
	142.82	-17.1513	1.56437			678.998	-181.521	1.28506			1064.45	5.05899	1.49452			917.024	-196.969	0.423677			1033.78	278.67	1.21957
	14.4968	235.376	1.6012			924.798	-3.13343	1.18416			574.232	-128.814	1.42809			1245.99	-94.2265	0.315825			631.007	304.892	1.05698
	633.961	156.121	1.1956			612.287	-71.0752	1.24243			651.196	104.905	1.21341			579.695	-197.697	0.56458			805.826	25.6625	1.17121
	404.513	122.133	1.35638			67.4633	-131.682	1.5608			1042.96	52.583	1.66095			895.617	-200.225	0.407747			1041.36	137.945	1.15173
	180.025	-81.0557	1.46234			463.717	-88.4206	1.21411			844.509	148.728	1.27445			1267.31	-76.6456	0.288472			570.623	91.2492	0.9992
	371.29	-223.979	1.71106			909.908	-282.303	1.28805			616.257	162.057	1.64409			748.83	-210.836	0.484453			1030.26	-12.2898	1.14924
	23.8111	157.329	2.06624			619.22	27.9867	1.32042			408.725	143.693	1.14919			66.8785	-261.045	0.523591			1251.97	134.013	1.23307
	341.419	97.7601	1.34569			647.947	71.4367	1.30813			1063.07	4.983	1.29372			79.0825	-306.417	0.515853			762.263	304.799	1.0927
	362.007	194.618	1.44929			757.143	-69.6048	1.23297			768.012	-96.175	0.972394			310.42	-123.718	0.566509			1087.61	212.776	1.16333
	470.366	-34.8014	2.13012			377.843	107.493	1.44288			720.202	130.197	1.43733			409.293	159.722	0.342297			982.929	97.3657	1.14749
	326.589	89.9693	1.55537			539.342	-94.4262	1.35681			551.24	98.961	1.14615			594.423	-184.656	0.376481			1013.91	183.387	1.1883
	174.385	87.996	1.69795			344.877	-143.409	1.36166			942.709	-32.38	1.36118			968.809	-247.181	0.294271			1000.16	280.582	1.14635
	47.335	255.078	1.62753			805.54	37.6203	1.305			490.137	-18.071	1.0343			853.02	-115.398	0.349266			863.25	314.378	1.06403
	376.792	140.964	1.41829			786.905	-70.9771	1.34183			1035.14	126.495	1.32154			827.023	-261.549	0.331821			1148.73	244.307	1.23971
	126.021	103.295	1.60979			22.0462	4.92687	1.66205			841.45	143.91	1.43503			1259.92	-84.1917	0.243784			965.915	222.534	1.17544
	451.331	45.0831	1.29907			741.33	-67.212	1.16391			341.966	-105.516	1.15264			833.274	10.0043	0.415973			888.265	277.574	1.15477
	577.108	22.6658	1.55194			149.219	6.44625	1.64995			635.845	120.78	1.0981			810.549	-2.8138	0.330121			656.154	76.4717	1.08782
	318.075	-5.8548	1.34493			529.707	-203.216	1.31851			683.197	-80.911	1.15481			35.0063	15.913	0.573323			1114.31	-143.432	1.44143
	234.554	-58.4605	1.70572			185.602	-309.311	1.38775			530.479	-18.242	1.04176			746.907	-210.744	0.303596			177.783	-75.8708	1.15829
	276.421	128.421	1.54329			35.5846	-254.538	1.74321			1076.8	179.58	1.29551			483.154	-106.984	0.349633			927.626	77.7948	1.0945
	260.693	20.0807	1.40165			611.402	-101.647	1.40701			518.102	9.30399	1.37149			330.352	229.279	0.222381			1242.33	106.764	1.20686
	412.429	18.9391	1.38871			284.468	33.7304	1.54062			789.05	113.406	1.43301			322.989	-133.18	0.42686			878.884	300.339	1.14521
	212.293	40.479	1.56767			10.2343	-402.357	1.61186			518.386	7.883	1.15783			930.612	447.714	0.202896			1174.01	214.187	1.21027
	178.015	89.4908	1.75319			266.226	-162.758	1.31662			1082.17	351.137	1.71215			340.361	-139.585	0.247923			547.752	-57.4958	1.26944
	200.712	48.8793	1.60764			278.748	-183.128	1.44156			455.293	80.832	1.152			1228.57	-110.446	0.162864			872.944	290.031	1.10624
	5.69635	160.938	1.57722			647.992	-69.3038	1.33161			698.089	130.176	1.21851			454.102	-129.135	0.263334			1242.99	192.643	1.16517
	-9.63147	6.11099	1.07864			208.808	-205.605	1.44524			1236.94	-151.814	1.80321			226.055	26.2497	0.276236			1151.03	144.793	1.16447
	19.9265	50.4304	1.40972			883.893	-54.3628	1.18438			1275.11	43.2	1.55581			12.1699	-55.3815	0.195463			891.533	230.033	1.12078
	261.243	81.8458	1.34886			422.268	-112.088	1.32119			870.641	37.453	1.28846			306.249	226.171	0.139705			1256.95	187.513	1.18834
	286.811	105.06	1.30226			578.716	-126.504	1.30886			268.81	-70.842	1.19518			499.314	-95.0804	0.290646			976.089	244.056	1.15291
	258.716	229.764	1.48647			406.248	30.6004	1.42859			1272.63	42.369	1.29715			983.434	-104.389	0.132703			297.8	80.6561	1.195
	478.828	71.4277	1.27558			687.325	-4.33415	1.31361			984.606	11.873	1.88134			958.565	-101.041	0.135166			1201.88	188.074	1.18274
	152.949	301.416	1.79925			233.831	28.2001	1.57232			1110.19	-117.723	1.81568			823.028	-57.5216	0.110633			1237.14	221.414	1.21698
	42.2365	290.522	1.47097			14.1656	-0.360203	1.56983			735.605	60.854	1.32835			38.0042	91.3659	0.181988			1151.83	272.264	1.12761
	-19.0918	259.717	1.64919			757.669	0.303972	1.37029			536.347	-70.209	1.05275			27.2631	-71.1695	0.0993886			955.354	302.871	1.08521
	69.1245	30.2046	1.64557			178.271	-214.742	1.42888			778.141	115.105	1.43291			719.479	546.093	0.0503364			1226.73	197.071	1.19483
	65.9118	-9.95649	1.31342			389.186	-146.967	1.29046			1234.36	-82.597	1.51802			52.6435	212.647	0.0744478			824.447	250.737	1.11414
	191.879	146.788	1.68739			135.461	-325.032	1.50957			937.102	56.754	1.4876			318.083	-252.504	0.0689454			925.765	267.761	1.1914
	590.822	131.9	1.22101			636.114	-163.218	1.37858			1139.55	-131.023	1.39433			753.293	-79.771	0.0391025			892.807	127.997	1.13146
	583.755	-11.9658	1.72854			230.019	-206.202	1.46907			420.366	8.97699	1.10859			686.203	-164.2	0.0294552			926.498	293.828	1.14758
	97.6595	-54.0711	1.49231			830.05	3.04396	1.28614			1155.57	-177.518	1.46635			1189.48	-92.0456	0.507048			951.581	263.456	1.17779
	116.488	-16.4817	1.53313			200.147	-13.5542	1.49208			721.129	113.29	1.20747			770.046	-394.042	0.563646			978.276	240.983	1.20205
	-6.06487	138.639	0.983957			258.96	30.7655	1.47263			530.321	-79.029	1.13965			1069.96	-57.8242	0.536768			855.655	197.477	1.15784
	0.140203	114.28	0.901026			241.654	10.6614	1.4998			830.782	-221.469	1.32971			80.2106	-239.675	0.730552			967.098	272.778	1.15479
	94.3144	-284.483	3.40484			304.464	-237.53	1.37132			500.635	30.514	1.1753			1092.77	-64.6926	0.537713			1227.53	264.264	1.15267
	509.11	43.9813	0.20918			768.994	-67.6686	1.15016			643.18	22.017	1.25034			733.647	-149.885	0.642302			890.943	244.054	1.13366
	546.891	99.4463	0.0599977			331.828	5.77508	1.31256			377.977	-139.72	1.17554			654.915	169.792	0.545128			1195.88	240.319	1.25896
	-70.968	-319.114	0.0451982			627.702	-55.0682	1.38614			626.081	116.881	1.05398			672.41	-420.03	0.562534			974.976	152.462	1.16396
	1096.66	-90.8863	1.12407			257.478	-41.8203	1.45674			1073.21	-27.907	1.58316			179.922	23.6162	0.75612			1095.97	283.193	1.11774
	228.212	-262.706	1.4358			667.507	-19.4731	1.2928			486.433	24.185	1.01843			37.3011	-293.802	0.719906			809.743	259.775	1.16078
	264.826	-419.602	1.82349			365.761	-80.6495	1.42782			889.468	174.769	1.36877			36.5639	-51.0899	0.768537			559.064	-91.5681	1.33965
	185.01	-395.563	1.73859			225.081	41.438	1.42026			616.92	-74.395	1.06135			638.963	169.573	0.632061			1181.77	135.879	1.19999
	296.041	-460.976	1.89104			40.2594	-211.754	1.6446			615.512	-169.162	1.36175			620.441	161.544	0.582894			1258.5	225.685	1.21331
	395.279	-281.117	1.46612			147.865	-402.966	1.43025			771.18	-211.892	1.19518			502.941	28.8479	0.602192			1088.5	241.545	1.15941
	859.648	210.902	1.33149			764.585	10.9071	1.24472			1205.91	65.039	1.52107			1064.61	-139.086	0.483472			1093.22	151.709	1.17762
	123.742	-430.517	1.93233			292.672	-192.508	1.50705			622.892	-103.411	1.20539			992.117	-99.8619	0.492396			368.092	124.552	1.24777
	812.58	-327.569	1.25334			232.304	-142.85	1.38908			1057.51	173.331	1.9543			700.395	-31.9467	0.515426			1220.24	157.477	1.17683
	416.962	-214.043	1.42937			214.457	-180.261	1.52437			882.358	-38.354	1.32366			641.489	-455.845	0.539738			1008.54	257.67	1.21453
	769.438	-248.182	1.50663			146.162	-209.76	1.54266			849.135	-5.03101	1.10336			591.421	-254.174	0.534956			1079.84	289.68	1.08675
	290.617	-236.708	1.56334			483.376	-107.747	1.4366			835.979	211.032	1.18992			567.692	131.132	0.536926			1165.36	238.725	1.21631
	868.074	57.5605	1.35137			717.832	-31.6842	1.24329			1235.4	-81.806	1.31559			591.527	-397.662	0.552095			422.247	61.3211	1.36921
	680.517	-227.069	1.34751			547.437	-197.065	1.33344			966.593	31.768	1.26843			32.8038	-40.1558	0.741294			895.094	174.477	1.11161
	444.963	-312.321	1.3365			484.211	-2.50391	1.38608			1029.8	241.955	1.47045			42.9217	-69.528	0.647486			857.549	289.568	1.11223
	198.521	-451.182	2.0181			484.692	-74.4883	1.46608			1241.35	94.675	1.61777			506.997	-219.825	0.498616			1097.03	211.313	1.18116
	951.643	-162.012	1.53803			638.646	-210.898	1.42915			756.525	76.947	1.23681			1012.04	-256.875	0.468693			274.264	-155.231	1.39066
	776.36	-208.018	1.36195			216.179	-125.868	1.34418			225.09	-25.286	1.12992			428.333	-64.2908	0.623185			801.108	72.0125	1.12269
	730.388	-454.665	1.68383			563.98	-233.361	1.25915			1222.21	-5.491	1.34536			519.971	-453.298	0.518251			1139.32	175.349	1.14838
	353.212	-383.903	2.01952			93.2769	-114.51	1.39582			932.121	-12.6	1.3382			304.638	-76.7541	0.560231			1127.61	277.048	1.13474
	970.866	-187.216	1.39632			669.803	-52.4042	1.29792			479.917	-143.559	1.17481			656.506	-185.58	0.514057			1139.03	-119.119	1.47627
	-41.8808	28.9764	1.20338			472.95	-72.4177	1.44532			353.769	28.911	1.15395			303.838	254.288	0.462256			853.403	281.546	1.16593
	219.675	-395.784	1.7178			475.072	-61.4061	1.29304			437.762	21.808	1.06339			576.036	125.004	0.519213			962.063	283.834	1.14269
	862.541	295.556	1.17559			122.486	12.9529	1.52939			856.754	112.158	1.26571			496.941	-413.546	0.510401			117.428	36.9185	1.45005
	221.408	-273	1.71246			442.206	-268.006	1.32303			707.853	93.16	1.65795			483.33	-433.497	0.512534			1213.4	250.561	1.23684
	947.284	61.509	1.25288			252.054	-209.517	1.3945			1098.75	135.628	1.55178			383.334	-58.8041	0.570502			1123.59	254.756	1.21819
	870.985	230.852	1.21501			487.811	42.2738	1.65637			591.249	59.689	1.42515			728.165	-27.3333	0.56928			1171.67	234.564	1.22926
	440.944	-201.747	1.38572			105.362	-6.90509	1.42778			1120.88	-5.487	1.47453			485.799	143.67	0.582709			1251.36	238.814	1.22116
	154.966	-286.504	1.92109			397.68	-165.731	1.329			352.512	60.536	1.21415			544.81	-207.491	0.521273			1202.95	253.273	1.22192
	1014.94	8.55092	1.17571			727.691	-66.7805	1.20023			1026.19	52.603	1.35931			1161.06	-136.429	0.424977			929.722	184.619	1.11441
	994.624	-117.218	1.29564			367.414	3.24162	1.46178			1159.34	-36.598	1.34176			558.505	-397.497	0.475663			973.507	169.447	1.12355
	961.363	-82.2286	1.2318			109.121	40.5377	1.59494			1013.63	-211.298	1.56616			209.264	-266.784	0.712649			626	-13.4985	1.35402
	735.372	-217.642	1.23809			260.299	-73.3691	1.46039			566.905	-124.022	1.26094			359.811	-51.9499	0.527051			837.244	189.724	1.10634
	84.8973	-391.941	1.58614			593.331	-9.34819	1.2083			452.802	41.192	1.29875			210.043	-153.228	0.616793			417.944	94.4779	1.28213
	784.012	172.038	1.32711			246.361	-224.638	1.3945			1010.31	144.11	1.45077			544.286	-451.94	0.498367			428.002	-176.926	1.63757
	98.2544	-292.481	1.57395			55.3721	14.2004	1.7482			1161.06	-190.633	1.40832			427.676	-40.9828	0.636785			1024.32	208.959	1.11895
	-108.009	346.062	1.2444			358.768	-18.0536	1.43409			254.95	-104.929	1.16477			436.782	-42.6356	0.583592			1026.49	261.946	1.19213
	726.84	268.699	1.11972			791.778	-192.819	1.80341			1241.05	136.722	1.56589			1054.26	-243.845	0.391496			827.254	284.976	1.08677
	1005.73	-249.966	1.30648			24.6576	-329.491	1.65636			1042.91	52.202	1.50287			302.72	-78.4071	0.565811			273.013	-143.198	1.21738
	967.9	-117.391	1.24806			259.103	-86.2409	1.46992			932.443	-75.864	1.21908			585.869	-186.382	0.502596			1059.99	242.293	1.1816
	-48.039	373.49	1.09894			74.9605	-57.4089	1.44768			1062.22	41.932	1.71724			149.05	-114.504	0.598412			1042.35	198.461	1.14637
	194.291	-331.945	1.72165			562.8	-97.8346	1.31202			969.377	249.055	1.35552			161.946	-157.916	0.582745			938.467	180.011	1.13264
	1012.81	68.3097	1.35358			651.679	20.8864	1.25924			423.275	-29.198	1.28958			548.069	137.744	0.55267			554.393	96.2822	1.28318
	657.401	-272.962	1.55969			501.966	-39.1581	1.42562			645.271	102.072	1.26233			727.797	-32.9749	0.624494			791.156	-86.8693	1.46671
	33.156	90.1739	1.22635			56.095	2.69673	1.72551			1003.16	-141.623	1.38795			241.285	0.301019	0.903965			407.414	57.337	1.22458
	293.485	-374.632	1.3395			91.3146	32.6857	1.4621			1204.86	62.625	1.38659			164.869	61.1917	0.704646			292.044	57.6126	1.73852
	794.497	241.46	1.37576			265.594	-26.6886	1.51353			1114.52	-35.859	1.35011			446.315	-43.7037	0.520439			201.11	6.99639	1.3131
	882.758	276.065	1.24305			945.847	-196.903	1.21118			794.866	-58.512	1.25497			655.685	-26.3985	0.510943			229.017	-186.905	1.50183
	952.625	-34.2041	1.18679			207.261	-133.614	1.41792			1198.74	18.089	1.35888			226.841	-154.86	0.50347			526.215	127.64	1.20564
	576.605	-314.775	1.52643			452.379	-103.904	1.23832			1053.44	-242.848	1.40804			385.284	-93.0701	0.471003			271.232	-114.742	1.23596
	368.188	143.437	1.18806			640.509	-197.824	1.35779			746.897	37.563	1.16006			485.46	133.041	0.516798			635.136	54.4677	1.41115
	697.208	-235.446	1.40955			201.411	4.19113	1.49093			1280.65	28.1	1.39655			692.71	-24.5386	0.502354			1215.85	67.2647	1.73678
	751.224	-242.885	1.64418			546.757	-63.3796	1.31489			1138.46	-131.307	1.45183			303.26	241.869	0.432384			1120.51	253.325	1.21719
	631.534	-196.171	1.09048			39.5991	-66.6043	1.85093			657.306	-99.659	1.33677			669.826	-19.6254	0.534017			1176.23	246.828	1.21773
	862.579	-229.06	1.25451			194.157	-168.854	1.39049			633.394	228.929	1.28432			369.61	41.6825	0.629494			458.004	78.0456	1.16952
	782.267	175.823	1.35995			346.926	-244.152	1.284			979.812	10.485	1.31796			1089.6	-267.693	0.358983			1055.62	263.372	1.15335
	789.728	-258.389	1.18385			331.856	81.6998	1.41467			964.261	243.87	1.46589			573.126	-200.152	0.473285			378.269	70.4922	1.22763
	210.839	234.61	1.21848			826.434	-48.28	1.35861			553.403	-35.287	1.10802			139.053	-302.612	0.621795			603.837	77.2833	1.28345
	970.089	-128.22	1.26112			265.337	-7.37877	1.41636			1073.26	89.79	1.35694			489.345	-95.7395	0.544232			822.702	189.687	1.1213
	1045	-141.965	1.3174			388.501	-99.5038	1.38082			432.729	325.871	1.2813			315.706	240.015	0.397719			519.211	87.1051	1.191
	528.244	-230.774	1.74173			275.97	-104.717	1.49042			1016.55	50.558	1.58923			409.403	70.1888	0.524183			266.215	4.84656	1.23994
	927.272	204.914	1.13851			448.163	-189.461	1.48412			1115.87	132.845	1.71985			42.8297	41.203	0.641295			886.584	44.4737	1.4078
	204.449	-280.258	1.7271			624.758	-86.0505	1.28648			720.506	126.818	1.40788			551.997	224.815	0.466352			1246.97	100.335	1.39859
	787.584	290.541	1.29997			181.622	-196.487	1.6267			1134.61	179.791	1.56474			236.433	-128.045	0.514859			1110.08	252.492	1.18855
	495.557	-237.119	1.43146			382.126	5.80297	1.46307			945.992	-44.132	1.39547			573.075	229.961	0.385116			530.472	56.1054	1.33309
	889.2	-64.0258	0.825338			307.075	-134.309	1.30202			1215.84	233.242	1.6226			284.763	-82.3371	0.476427			766.634	118.002	1.34307
	913.398	207.809	1.10352			773.684	-173.882	1.2817			682.049	-81.06	1.23965			108.92	-435.483	0.522478			1078.14	271.408	1.17321
	562.154	-305.81	1.463			222.15	-18.8158	1.49274			849.922	9.246	1.38322			1130.8	-258.341	0.322266			1151.94	110.268	1.62383
	186.058	-394.726	1.77369			381.558	-195.119	1.4168			430.373	325.438	1.31347			32.6085	24.668	0.541441			441.975	62.1003	1.27719
	539.058	-248.079	1.52731			516.51	-52.3952	1.35217			651	157.906	1.21395			-2.88341	-309.754	0.50668			1206.78	143.896	1.52626
	161.81	335.662	1.38011			559.347	-47.5464	1.26991			792.523	-30.179	1.51073			240.918	-182.501	0.470211			768.793	78.112	1.28894
	390.505	-258.489	1.31101			79.1081	-40.6092	1.37119			1226.49	18.757	1.35708			916.52	19.3421	0.403416			433.475	93.1762	1.20109
	790.479	208.168	1.20736			511.563	-77.775	1.3315			555.017	55.822	1.36648			162.546	-136.718	0.589346			708.091	78.8829	1.34604
	1052.76	-112.207	1.17963			884.879	-155.883	1.35209			615.475	156.924	1.59482			1136.22	-121.197	0.386237			709.439	110.429	1.31375
	795.923	293.075	1.27578			182.019	16.1174	1.5424			824.677	37.948	1.53976			1080.37	110.473	0.381725			1059.6	116.772	1.42842
	85.9504	-203.837	1.9805			467.583	-15.1826	1.67574			678.392	73.145	1.25197			71.4301	-407.664	0.487999			54.9297	93.0085	1.3793
	1040.69	24.3584	1.16691			196.38	-146.953	1.40523			745.478	-14.157	1.26243			21.7148	-6.73408	0.672526			489.704	135.599	1.17505
	350.627	-257.983	1.76725			413.014	-33.061	1.41847			840.779	93.257	1.30871			764.948	26.4033	0.444991			423.968	144.757	1.30574
	615.07	-249.635	1.33738			63.5969	-54.5109	1.5539			927.007	34.134	1.53106			1016.57	-270.069	0.370995			1226.84	126.092	1.47074
	771.024	-258.77	1.56632			37.4015	-42.2297	1.60194			1056.19	-79.18	1.39929			497.228	-40.0201	0.400135			925.761	86.3972	1.44052
	990.657	-63.9825	1.23913			389.218	-57.0703	1.38648			1208.95	123.571	1.24844			981.776	-278.384	0.353176			969.443	106.232	1.46668
	882.351	103.012	1.34904			402.692	76.9528	1.37126			913.503	105.726	1.49663			428.815	-23.818	0.432591			881.173	-51.4744	1.41451
	889.658	-159.639	1.53331			290.197	-99.276	1.41632			1114.79	131.278	1.64585			761.252	42.6555	0.404687			1107.97	-3.1345	1.26977
	809.1	-234.937	1.36828			417.094	-129.996	1.54548			708.132	94.177	1.58895			-8.35521	-325.504	0.541533			1104.28	70.9389	1.37812
	918.834	-212.452	1.20872			169.688	-25.3526	1.57412			360.332	-89.837	1.05864			364.039	219.584	0.409761			1020.9	146.937	1.37061
	849.631	213.102	1.15159			439.015	-63.6247	1.30403			586.595	-20.938	1.35277			449.612	-97.6356	0.441212			818.794	28.6175	1.44167
	345.349	-278.45	1.63255			532.002	-77.3364	1.66719			1142.67	155.727	1.48657			656.725	17.7481	0.436585			371.831	-138.289	1.25121
	952.469	-20.3926	1.38116			581.298	-90.0601	1.21995			1201.91	-251.3	1.7779			1056.3	-133.574	0.344219			577.984	159.744	1.2665
	671.445	278.519	1.16859			312.054	-19.4928	1.43725			726	-181.258	1.24168			97.6358	-70.8355	0.483648			965.461	-6.82244	1.3712
	540.791	-247.225	1.54205			86.4296	22.5674	1.56216			722.232	127.177	1.37031			319.783	222.268	0.401817			653.912	-62.6615	1.3307
	143.381	-368.094	1.94765			470.717	-32.2841	1.38184			567.509	65.6	1.16308			593.37	-164.43	0.444426			892.404	174.75	1.32752
	303.457	-449.482	1.72051			610.045	-20.9835	1.32864			822.153	176.245	1.31808			111.604	-422.546	0.455638			800.797	68.1149	1.40335
	99.7609	-358.439	2.02861			313.143	-185.234	1.42978			922.173	156.295	1.28782			180.085	-143.268	0.481292			307.48	26.195	1.23772
	451.908	-413.429	1.57392			649.417	-35.7752	1.24837			696.057	166.201	1.25198			747.015	118.112	0.380709			234.033	109.621	1.3058
	887.428	3.28744	1.49908			534.872	-20.0181	1.29522			649.577	104.456	1.10352			87.7911	-86.4079	0.501143			678.854	99.5342	1.31337
	722.789	295.167	1.28925			811.29	-20.1644	1.21891			978.43	123.955	1.3372			566.767	-166.47	0.39726			982.817	64.8018	1.41777
	762.818	-222.829	1.38696			480.634	-29.7312	1.32669			463.005	-21.411	1.12884			726.29	126.658	0.378556			585.296	16.5259	1.19508
	73.5662	-197.065	1.22521			16.4653	-86.1083	1.901			1042.65	52.572	1.50482			1193.88	-0.235575	0.276453			986.369	94.0171	1.39003
	897.458	71.9913	1.30841			627.112	0.285199	1.42069			585.533	117.7	0.962671			220.258	-64.0979	0.487499			997.097	92.1164	1.38515
	211.026	-400.887	1.55801			147.522	23.7698	1.55168			481.37	-20.79	1.14089			491.959	-24.1583	0.382118			1081.78	222.344	1.46523
	688.226	251.758	1.26532			130.649	-38.8894	1.4952			574.639	67.025	1.09728			569.062	214.076	0.333539			1074.46	61.2483	1.48871
	1018.14	9.04851	1.18855			186.161	-103.058	1.4246			525.298	13.834	1.05552			-16.0809	-280.707	0.521397			824.141	160.058	1.30714
	975.992	-198.806	1.29409			284.189	-54.8572	1.39403			1102.93	167.215	1.20225			147.392	-435.785	0.422256			795.61	116.173	1.36559
	498.839	-235.823	1.74828			415.821	-81.1731	1.38509			967.789	71.203	1.37814			416.029	-87.2821	0.388534			664.658	35.1723	1.30754
	707.727	-286.472	1.43915			200.942	-54.796	1.52468			904.097	-65.589	1.29546			252.504	-80.6156	0.385913			810.29	87.6898	1.4038
	97.2928	-265.211	1.7295			733.651	-103.33	1.23646			1017.52	59.911	1.36348			464.354	-96.4566	0.468601			648.428	178.098	1.36332
	516.975	148.158	1.16066			546.641	-1.3141	1.26916			433.377	19.469	1.14571			331.165	-122.164	0.455468			471.513	216.253	1.39604
	746.181	-242.928	1.50375			158.583	-130.151	1.41913			1014.82	120.517	1.348			346.247	-119.015	0.369994			1133.32	78.8391	1.65149
	812.541	279.397	1.13059			81.0994	3.19127	1.75555			235.12	-29.661	1.0913			635.819	14.3935	0.381249			686.718	130.251	1.43886
	929.419	-60.7473	1.37732			443.507	237.886	1.33684			532.892	85.964	1.08133			704.059	99.3042	0.410553			201.369	34.3359	1.07391
	859.207	210.131	1.03118			238.917	-109.207	1.56688			575.482	-119.486	1.36473			20.2829	-6.13232	0.611514			1117.71	131.948	1.41008
	192.476	-190.734	1.28486			273.008	-59.4972	1.45654			715.594	-33.921	1.28082			92.4528	-424.786	0.381023			619.302	90.8425	1.2472
	80.5478	-322.163	1.44147			172.365	-170.053	1.46008			1004.28	36.746	1.37004			92.594	-35.7744	0.50726			1100.62	29.2925	1.46372
	676.291	235.673	1.23234			118.631	-128.785	1.34525			646.861	-99.864	1.05206			528.057	233.795	0.366087			542.595	115.52	1.22029
	977.894	-139.277	1.2887			288.399	-151.824	1.41139			918.064	7.02301	1.16234			569.175	64.1844	0.363097			197.831	75.7935	1.28872
	880.865	116.395	1.35952			84.1508	-24.4599	1.42346			1102.87	100.415	1.2002			296.006	-111.853	0.446349			218.183	24.8146	1.08014
	896.906	-79.3513	1.51799			436.795	-12.0298	1.39698			670.085	61.551	1.221			1106.77	-158.549	0.298076			330.549	-179.405	1.30755
	540.044	-245.3	1.50048			376.093	-116.833	1.34013			1168.73	157.613	1.46924			732.421	109.541	0.423832			318.611	334.2	1.37044
	949.043	8.52536	1.23623			540.407	-47.7515	1.29131			754.019	-3.22101	1.26029			100.938	-38.3063	0.444599			379.696	193.943	1.19344
	559.579	-379.372	1.44519			233.259	-64.1163	1.50344			677.164	73.105	1.36859			133.189	-439.744	0.406282			871.489	118.65	1.39476
	245.408	-334.658	1.21674			660.584	-229.636	1.56934			707.161	117.402	1.30601			106.483	-62.8217	0.42304			942.127	62.8494	1.58817
	976.749	-211.517	1.3581			581.589	-44.7604	1.26875			791.361	-125.604	1.16488			625.774	-34.3783	0.36958			850.173	71.9741	1.48575
	844.365	125.91	1.13154			185.077	-78.2131	1.40745			754.028	50.123	1.2584			314.049	-114.188	0.491485			1086.94	31.7274	1.4435
	57.4227	-117.928	1.5875			684.044	-47.6968	1.31775			596.297	48.591	1.12742			312.689	-130.117	0.379567			1234.43	52.0719	1.60138
	892.115	137.352	1.19606			174.223	-119.389	1.33956			1005.15	35.193	1.47592			432.665	-97.5671	0.375736			1024.37	19.9347	1.38213
	373.866	308.061	1.40419			302.606	-34.8031	1.53104			669.37	163.689	1.1508			612.12	-192.579	0.357614			733.754	127.752	1.35622
	645.79	269.068	1.23743			302.25	-160.952	1.47455			884.45	82.362	1.24222			337.059	227.216	0.350399			729.658	194.761	1.21411
	1002.35	-190.211	1.50774			766.976	-44.7059	1.31106			480.896	-22.364	1.40582			586.009	-25.8634	0.358209			659.219	131.82	1.23866
	508.083	-254.986	1.39228			593.836	-20.0662	1.256			708.293	8.96201	1.17076			1088.82	-151.199	0.268512			1108.93	26.1098	1.52525
	895.683	134.534	1.2595			458.052	-45.4297	1.25892			861.571	11.988	1.37444			941.207	-119.163	0.282442			1024.57	62.2868	1.5622
	187.314	-250.417	1.61944			748.274	-216.588	1.22359			1066.74	-80.869	1.56268			935.286	-130.981	0.279185			1160.67	233.27	1.4072
	1036.79	-217.938	1.27458			286.29	-72.3612	1.32341			777.178	385.2	1.5541			369.144	-352.071	0.334709			387.715	299.936	1.17416
	1027.62	-29.4769	1.37928			136.067	-24.3008	1.50374			1113.63	296.33	1.55712			193.185	-149.755	0.365146			786.676	-175.4	1.55069
	20.2793	105.672	1.4831			222.045	-78.4567	1.36052			501.314	-111.442	1.27122			455.184	-17.4788	0.369954			1127.91	133.011	1.43915
	837.556	259.686	1.32406			562.564	7.94207	1.62327			1262.53	-50.891	1.39968			385.842	-339.754	0.349908			623.771	241.621	0.910857
	1055.65	172.41	1.15056			168.793	-92.1666	1.67985			834.037	78.59	1.22861			-0.628931	-286.508	0.365369			1094.63	19.1052	1.43768
	-106.255	328.309	1.24591			123.989	-120.623	1.41985			1272.46	76.337	1.35274			1013.23	-159.801	0.299523			875.076	184.704	1.70975
	828.04	241.473	1.18286			154.074	-38.2339	1.46789			1112.73	-114.039	1.4825			-8.24696	-344.671	0.370684			328.167	124.723	1.13178
	783.267	-286.306	1.39145			608.49	-202.586	1.25516			825.679	41.104	1.36417			268.617	10.9877	0.353795			188.394	249.953	1.45274
	767.782	269.434	1.09855			342.984	-39.9721	1.3216			1060.08	173.333	1.71952			323.604	-368.261	0.30819			391.118	154.419	1.31079
	85.6633	-267.805	1.69193			208.086	-41.2325	1.64143			166.3	-57.859	1.1895			464.949	-416.804	0.271013			776.201	188.962	1.57115
	410.751	324.954	1.22123			331.458	-115.322	1.26755			1096.52	139.311	1.53031			912.687	-133.292	0.263627			202.109	53.6811	1.34234
	319.283	-251.523	1.84054			128.211	-77.8497	1.54383			615.354	57.316	1.40176			348.773	-345.724	0.263945			497.745	232.59	1.21901
	967.48	-183.24	1.27918			108.885	-210.441	1.17082			632.17	61.774	1.47139			364.649	-328.797	0.269098			490.432	65.4853	1.24252
	569.34	-228.306	1.44745			317.738	-74.5749	1.39316			1227.03	158.524	1.69331			1179.61	-184.869	0.220145			691.391	188.498	1.56086
	396.765	-298.593	1.52649			340.622	-98.5293	1.5035			386.259	-79.421	1.13074			324.58	14.0722	0.323784			384.972	-91.8822	1.23446
	863.12	64.0942	1.05671			258.469	-125.419	1.46303			571.575	97.075	1.11221			329.321	-344.667	0.271454			959.536	183.859	1.56435
	576.285	-177.006	1.23679			110.52	-159.824	1.62564			799.176	75.371	1.35018			298.969	-359.223	0.264555			1221.65	244.578	0.617676
	682.142	-266.913	1.43002			150.705	-88.0592	1.61183			1147.5	123.623	1.62622			337.952	14.3211	0.277634			679.413	527.688	1.03365
	843.701	18.2667	1.1389			294.085	-82.0754	1.44587			991.47	134.734	1.26978			129.192	-108.433	0.443453			1222.83	533.245	0.985348
	141.186	-230.151	1.49286			983.125	-207.42	1.42463			797.778	66.254	1.34103			314.125	-346.284	0.263741			1254.76	307.355	1.01845
	782.827	-237.402	1.2691			447.29	35.0678	1.18082			431.296	-55.276	1.40581			621.43	-661.9	0.174583			351.696	506.29	1.06498
	740.043	195.42	1.12094			269.395	-101.625	1.31609			1247.89	-159.532	1.46556			869.784	-213.886	0.211882			1261.86	-294.11	1.05433
	551.253	-187.685	1.55334			427.343	-43.2024	1.29037			559.733	-90.842	1.30385			857.533	-146.081	0.21978			1283.14	-127.854	0.988008
	795.447	-62.7311	1.10441			1099.01	17.9515	1.30732			716.735	37.557	1.51439			961.981	-147.227	0.203172			1211.31	-297.41	1.07261
	119.521	-278.255	1.67163			1035.98	122.219	1.47072			839.464	102.102	1.38107			1042.37	-157.083	0.198008			1270.36	68.1841	0.95166
	593.568	231.281	1.30453			1151.99	-276.283	1.53356			583.303	16.729	1.39421			73.372	-33.1884	0.321375			1154.88	-301.095	0.999015
	911.007	224.622	1.18539			673.872	207.656	1.19758			960.333	-2.58499	1.34537			558.321	-232.808	0.212375			-79.6747	353.094	1.11433
	907.036	-73.3546	1.59595			323.577	44.3315	1.19573			990.042	-150.596	1.33732			812.766	-121.245	0.198562			1243.26	-172.526	1.0218
	115.482	-197.043	1.8061			1299.53	-164.21	1.45178			636.221	65.386	1.2032			337.028	115.961	0.221869			6.90562	445.136	1.1
	557.953	-243.322	1.59196			708.646	-217.275	1.57445			798.114	58.241	1.24893			833.658	-130.009	0.189234			-77.9069	326.018	1.10449
	333.527	-405.209	1.44475			780.069	-165.205	1.42279			685.418	50.098	1.1379			310.262	103.976	0.234973			1050.45	-307.913	1.01918
	810.151	279.286	1.37382			309.825	54.6346	1.30729			642.04	21.437	1.19951			424.143	104.348	0.196198			223.102	386.493	1.07503
	362.636	-400.483	1.6658			602.693	127.017	1.24781			617.128	58.588	1.48976			402.877	-162.156	0.210862			1097.61	-85.0459	1.18525
	526.872	-423.868	1.33286			760.325	-211.221	1.56297			910.679	63.964	1.57876			386.225	113.398	0.214595			765.427	299.576	1.08736
	431.402	-228.841	1.61837			851.636	-264.337	1.42842			549.39	35.683	1.28286			343.476	-168.619	0.209264			-42.6979	295.478	1.15255
	905.169	-73.0798	1.27401			429.824	82.1852	1.25573			979.428	90.948	1.52148			787.242	-150.635	0.157841			1107.32	-260.685	1.10394
	105.143	-407.769	1.66562			609.253	95.8647	1.28012			1252.98	-160.321	1.42117			199.088	-122.577	0.256365			-76.924	310.964	1.12812
	917.053	209.995	1.23349			689.717	-212.318	1.57388			500.295	36.612	1.05226			868.225	-384.363	0.165252			-70.3692	259.764	1.17534
	-30.8346	372.399	1.02471			720.305	212.995	1.30026			1095.83	157.236	1.59052			844.361	-279.607	0.149878			1027.58	-309.406	1.02676
	229.209	-296.372	1.62628			693.104	210.092	1.19788			1112.07	85.131	1.55161			847.709	-262.675	0.138742			1030.31	-231.022	1.1216
	421.324	-228.488	1.63077			1022.42	-307.733	1.46587			614.438	55.674	1.38368			825.946	-281.263	0.142691			1045.19	-287.171	1.09817
	538.265	294.164	1.38347			1061.24	-167.686	1.41801			1153.32	217.286	1.31682			813.451	-144.514	0.15161			1002.79	-311.025	0.990973
	981.672	33.6863	1.46452			1200.65	-284.073	1.63238			655.585	356.614	1.32708			885.519	-269.304	0.130197			1012.34	-218.562	1.10791
	771.084	269.871	1.08248			377.221	164.653	1.21491			618.609	60.674	1.22727			-2.6347	-229.763	0.177278			-66.1065	145.288	1.13889
	812.58	157.083	1.32858			743.19	191.001	1.45498			506.471	48.744	1.10321			-13.5475	-251.409	0.16909			981.626	-292.851	1.04878
	74.6567	-388.182	1.22053			708.796	55.2534	1.29619			949.026	32.221	1.4101			887.996	-284.517	0.118611			998.395	-311.312	1.00891
	495.52	-240.94	1.45263			1104.7	-291.761	1.65884			679.393	73.374	1.26481			867.892	-268.688	0.126145			1024.48	-166.136	1.09704
	672.259	254.9	1.19684			811.149	274.357	1.32294			653.702	53.731	1.35313			189.759	99.2496	0.124128			192.116	229.562	1.07945
	795.269	163.516	1.24042			1019.44	87.8119	1.46258			1122.1	162.779	1.2063			144.337	-222.063	0.0978416			828.835	353.343	1.57701
	102.68	-275.138	1.78759			446.19	149.505	1.22872			386.336	8.10501	1.17295			128.641	-249.172	0.087947			984.068	-305.383	1.01763
	913.442	-250.225	1.11896			1297.57	54.5868	1.67756			618.7	61.315	1.19244			173.682	-278.85	0.0909418			0.36293	122.506	1.1703
	286.917	-337.962	1.62521			740.979	-123.782	1.40455			519.594	50.398	1.38115			88.3056	-164.8	0.137074			276.93	219.8	1.04329
	162.441	-234.264	1.75648			379.068	151.441	1.20088			683.104	91.733	1.22958			155.98	-306.622	0.0882171			973.293	-88.4812	1.11005
	110.138	-282.43	1.53033			374.887	-135.253	1.3182			950.73	-182.272	1.64292			180.521	114.985	0.105442			986.082	-191.959	1.10861
	302.776	-461.172	1.58347			757.909	-139.944	1.46518			699.698	28.983	1.14303			871.122	-227.674	0.0656175			141.809	205.153	1.15437
	618.062	-312.786	1.13623			1226.37	-196.474	1.50988			988.629	-51.217	1.55766			910.919	-214.49	0.0698782			395.219	171.893	1.09103
	750.847	129.601	1.17318			535.76	35.0886	1.21468			555.731	-91.456	1.30943			856.339	-217.439	0.0683554			886.779	-307.894	1.0344
	783.411	-279.167	1.25292			988.474	251.782	1.39293			1008.37	-156.161	1.44005			871.546	-206.486	0.0648722			866.859	94.3597	1.06071
	813.006	-251.386	1.34784			1144.28	-245.677	1.60628			807.327	80.405	1.19844			832.152	-219.704	0.0620541			909.869	-274.082	1.12739
	906.669	46.9179	1.15644			1305.22	-108.43	1.45546			754.628	77.4	1.53535			760.809	-251.532	0.0508185			815.802	-232.513	1.10042
	344.791	-367.836	1.70036			264.043	-150.533	1.24951			795.661	70.223	1.33622			805.027	-229.914	0.0562222			919.932	-246.765	1.09363
	807.156	-184.599	1.43774			1233.58	89.8552	1.4944			577.702	16.357	1.29111			795.791	-214.208	0.0568542			895.05	49.6255	1.09898
	535.864	-441.606	1.49677			1027.52	-158.891	1.63257			1032.27	-46.417	1.36518			751.548	-252.922	0.0519958			267.821	153.217	1.17149
	102.027	-275.747	1.87006			1264.85	239.563	1.40302			1053.73	78.299	1.34323			784.517	-224.842	0.0459057			1045.08	29.8142	1.42575
	744.856	190.212	1.34937			1248.79	-286.586	1.6254			749.651	65.944	1.12264			632.075	-223.128	0.0472496			878.247	111.908	1.06282
	448.418	-260.169	1.49895			1043.78	192.481	1.37896			1052.23	136.566	1.46155			725.333	-218.039	0.0472912			947.041	-186.505	1.133
	578.784	289.331	1.19924			755.642	-158.785	1.44519			1284.7	154.494	1.44721			163.245	91.7492	0.0634437			268.116	144.1	1.18814
	83.0484	-163.354	1.85058			306.925	-76.2916	1.16624			761.905	299.375	1.45041			674.299	-219.242	0.04519			873.726	-243.813	1.03891
	320.874	-459.294	1.61754			674.304	169.042	1.30746			1208.7	50.545	1.19352			294.746	16.8415	0.0584638			658.611	-333.498	1.08986
	958.872	103.767	1.25261			684.024	61.8934	1.29237			1131.49	89.697	1.59084			768.488	-226.467	0.0445719			817.042	-295.22	1.02068
	464.153	-165.268	1.34493			797.135	232.062	1.37484			1026.26	40.154	1.25591			698.908	-227.028	0.0381874			789.721	-316.915	1.04026
	808.614	279.757	1.29019			1062.75	145.66	1.32256			1132.4	-66.065	1.51458			725.396	-237.372	0.0387502			-61.2013	70.1616	1.17129
	446.925	-284.101	1.52082			1169.42	70.6091	1.34621			422.705	227.972	1.60668			1059.62	210.581	0.491386			758.49	-237.271	1.06559
	538.582	238.47	1.30596			948.65	273.924	1.27815			1023.41	-210.487	1.06801			1029.26	16.5107	0.490658			-60.2706	55.907	1.16603
	347.196	-452.798	1.78869			469.209	94.3764	1.23086			771.18	-162.766	1.27818			1040.12	258.584	0.445883			888.98	-195.137	1.11772
	719.69	-376.243	1.5871			1013.23	103.66	1.69006			657.817	184.496	1.22466			987.218	279.55	0.454151			770.696	-253.997	1.04638
	819.532	-208.619	1.4036			1159.31	165.187	1.39471			353.491	267.426	1.56456			1060.48	126.27	0.452065			432.011	168.725	1.08578
	791.492	-102.775	1.26134			1203.06	-172.202	1.41512			706.447	-117.698	1.28037			992.897	20.5649	0.492237			947.574	-175.517	1.10616
	1055.72	-189.844	1.30644			1289.62	-53.6151	1.52714			353.579	226.478	1.3565			1150.47	179.952	0.398107			566.112	124.848	1.07164
	785.291	-278.425	1.37568			294.413	-349.74	1.28999			352.647	83.6691	1.28819			959.586	420.696	0.407523			770.919	-279.597	1.09307
	986.821	-384.62	1.28581			585.675	156.495	1.27789			958.697	-224.892	1.13581			332.163	67.7759	0.59172			386.03	116.549	1.09941
	558.806	-242.76	1.86289			962.652	100.155	1.34536			874.651	-208.806	1.21557			945.225	84.3479	0.47174			300.007	144.693	1.08036
	925.686	-187.207	1.50533			658.379	125.557	1.25854			351.619	229.009	1.22125			821.218	453.854	0.374197			564.588	136.508	1.05758
	486.221	-210.955	1.52833			864.222	-229.148	1.26484			507.061	90.9306	1.3988			629.569	82.0726	0.550304			400.044	142.703	1.0497
	949.322	61.5661	1.2749			1181.94	200.394	1.34005			560.446	169.993	1.19144			189.178	-108.474	0.528507			171.916	120.921	1.06847
	536.189	313.551	1.16453			886.909	-145.089	1.46765			422.169	228.318	1.49799			424.36	10.1954	0.545062			844.65	-313.614	0.978088
	416.24	-212.584	1.31529			1261.17	51.5509	1.49692			796.424	26.3752	1.13075			405.742	-23.8551	0.709809			641.507	88.9166	1.12427
	110.157	258.706	1.57313			375.546	36.0227	1.16384			382.927	41.5915	1.20638			1014.57	205.574	0.419505			736.111	-171.618	1.08113
	545.625	-270.227	1.50551			362.927	-92.58	1.25466			466.265	221.029	1.28997			1003.48	397.755	0.362547			790.028	-300.708	1.05227
	787.258	252.205	1.24871			341.415	-102.573	1.33254			457.823	231.856	1.25644			479.731	57.2617	0.557124			236.019	286.747	1.2004
	911.675	-37.4983	1.17021			789.291	152.1	1.4538			450.47	174.135	1.19488			804.568	-83.1406	0.600363			809.353	37.3138	1.10002
	595.869	-215.327	1.46933			630.875	-337.288	1.334			448.51	174.624	1.1961			335.044	222.952	0.777934			832.497	-53.5954	1.0666
	105.487	290.887	1.3734			924.55	-154.629	1.47475			418.603	-296.892	1.28147			330.392	95.2795	0.594127			752.18	-297.538	1.0973
	278.766	-131.609	1.2553			1039.38	170.923	1.34822			723.31	120.476	1.2518			877.831	67.9914	0.567166			737.268	-275.076	1.07056
	760.28	216.896	1.21945			1184.09	183.606	1.35945			465.305	221.579	1.23895			330.107	-171.706	0.880332			853.684	-4.51277	1.13194
	103.508	-344.254	2.04197			602.286	76.4004	1.28195			470.451	-252.527	1.32615			366.677	-1.34419	0.583022			790.705	-171.128	1.06906
	671.935	-194.152	1.30151			1121.34	-287.923	1.47605			329.594	123.224	1.25355			915.419	402.363	0.337668			142.917	68.1815	1.13985
	926.674	-220.593	1.22344			692.326	-192.7	1.39008			712.443	59.498	1.03461			946.351	57.5737	0.432912			554.61	-340.288	1.01725
	579.011	-178.658	1.32258			999.981	286.807	1.41881			352.171	186.891	1.26089			923.901	346.201	0.353989			582.668	-338.456	1.0061
	545.57	294.853	1.24381			961.225	-192.439	1.6135			455.391	279.381	1.48546			1058.1	98.8119	0.408702			-49.9869	-101.596	1.21745
	817.506	102.876	1.30776			1185.12	-43.5552	1.31359			500.045	-269.245	1.35411			928.748	28.092	0.518835			551.541	-289.278	1.1215
	831.709	-36.5782	1.24553			1057.32	89.0487	1.33333			577.878	-57.7713	1.21954			559.502	-167.291	0.494621			730.885	53.4747	1.05649
	74.6425	313.981	1.4182			808.505	-161.87	1.44418			850.144	-216.931	1.10476			824.33	250.127	0.424618			842	-183.909	1.09229
	298.582	-459.363	1.84698			888.926	-177.053	1.47648			826.68	-219.353	1.09207			438.108	-2.02315	0.49581			1.03317	55.3593	1.18897
	535.026	317.247	1.356			1085.41	-274.029	1.58109			211.643	128.976	1.32619			684.59	-170.143	0.522499			697.701	-307.62	1.08197
	792.07	239.268	1.14499			1271.05	187.508	1.48966			438.629	-208.443	1.37161			351.12	16.5615	0.586026			-18.9857	-5.63495	1.18556
	193.911	292.661	1.46188			1142.39	323.106	1.53918			661.518	-126.358	1.1674			66.8028	-322.427	0.579007			401	95.1198	1.12318
	163.992	-229.094	1.66245			1250.71	-234.992	1.54069			821.625	-40.7758	1.29254			892.581	227.486	0.360366			909.337	-129.858	1.14326
	809.087	-284.897	1.23974			1159.52	-113.217	1.4891			839.865	-30.9289	1.13893			64.1566	-17.0325	0.650062			856.619	-139.027	1.09448
	625.524	278.343	1.17672			685.889	-119.473	1.39903			97.0098	431.721	1.58078			571.743	-170.568	0.515294			846.015	-105.697	1.04904
	477.654	-164.824	1.48111			375.187	-149.21	1.21071			1033.83	0.185513	1.21269			-61.2525	-390.733	0.562347			816.301	-294.064	1.05908
	273.181	-180.643	1.63755			1257.89	-157.422	1.46002			849.387	-214.797	1.18676			62.3472	-46.8375	0.526068			683.245	-311.017	1.11371
	1015.78	-4.99667	1.40253			1268.26	132.247	1.56469			497.012	97.0326	1.44734			1002.97	-66.9549	0.434917			723.027	-258.204	1.05619
	235.252	-310.458	1.64581			959.918	140.13	1.24304			561.738	-4.46456	1.1523			885.308	414.143	0.317918			662.429	-278.276	1.0994
	750.404	241.355	1.24958			354.521	-155.149	1.22708			820.508	-38.0823	1.18413			291.881	383.451	0.472676			863.388	-30.5668	1.03683
	912.692	-36.9386	1.38986			725.526	-230.853	1.44318			786.285	102.248	1.1299			165.624	-367.488	0.501872			153.988	-105.29	1.17488
	726.97	141.322	1.19503			1120.99	-119.733	1.41328			737.728	50.2973	1.16972			838.34	498.28	0.307749			24.4941	-113.722	1.23049
	668.622	212.142	1.24088			1241.69	-191.66	1.66924			-104.669	-82.8962	1.25353			705.886	-82.6947	0.430081			799.127	16.5203	1.06418
	713.766	296.587	1.26289			912.034	-229.112	1.56139			608.57	61.6485	1.23296			446.037	-67.0848	0.4744			679.369	-214.573	1.03253
	843.935	105.642	1.26277			993.55	-167.471	1.39894			230.036	235.407	1.50536			514.619	-35.8502	0.48657			851.113	19.4547	1.10937
	898.712	-231.113	1.33727			828.956	-156.456	1.4277			957.071	-136.67	1.44455			661.818	-161.771	0.611019			256.267	-112.666	1.13471
	899.836	-64.5822	1.41706			1044.11	-182.429	1.41874			232.739	161.416	1.22402			434.149	-25.4294	0.537252			-38.3433	-279.924	1.22082
	595.089	293.086	1.10013			1068.91	-236.766	1.43403			464.589	439.665	1.15578			1113.39	94.307	0.353302			192.836	-74.1856	1.18052
	815.649	130.029	1.23471			618.979	-185.984	1.27672			989.108	-238.253	1.13187			607.484	-170.42	0.460935			509.665	-343.223	1.0416
	53.3226	281.438	0.891975			363.602	91.6105	1.31107			797.881	-218.966	1.15874			964.443	117.959	0.338451			-34.4493	-238.512	1.22736
	489.206	107.579	0.90535			226.545	-67.4732	1.2789			625.592	-215.733	1.00479			790.202	-170.78	0.424618			197.022	55.8033	1.13477
	743.23	193.358	1.20491			703.723	-279.143	1.39708			543.455	32.9872	1.24859			859.963	219.942	0.343419			-17.6288	-79.259	1.15718
	322.602	-179.609	1.53436			615.021	5.04726	1.20956			99.7616	201.645	1.56059			428.66	324.939	0.525159			796.597	-58.8026	1.03751
	268.092	-299.364	1.5157			732.104	15.4081	1.35125			216.272	231.798	1.71039			93.0775	145.446	0.58803			631.817	-181.854	1.12162
	939.79	-311.267	1.16795			526.076	196.503	1.36533			707.97	-25.6453	1.11989			355.223	239.96	0.382187			655.82	81.1857	1.09517
	833.937	255.625	1.12741			1274.65	176.635	1.49509			312	-190.642	1.41435			1199.76	-76.8475	0.314923			908.821	-204.625	1.03604
	748.251	-294.874	1.25955			337.046	-88.1244	1.2929			696.355	-187.814	1.23386			957.636	-4.15235	0.435223			393.598	-350.801	1.14746
	699.327	226.546	1.24937			850.324	-171.978	1.35573			782.869	233.669	1.18599			588.609	-6.69137	0.477215			791.343	-17.3237	1.02502
	130.798	334.36	1.35016			344.365	23.1375	1.23032			539.903	-137.828	1.16886			754.632	-97.8836	0.483414			567.225	-278.617	1.11519
	130.245	-269.505	1.72881			791.428	195.499	1.37129			565.754	-143.152	1.29572			87.2553	-46.9887	0.605781			-8.40795	-53.6378	1.11336
	119.188	-332.953	1.92083			1288.21	-0.342858	1.42069			751.413	-170.209	1.46091			954.284	25.3452	0.364578			-47.8294	-53.1332	1.14229
	689.055	254.831	1.19054			496.853	81.6564	1.24913			43.5069	96.5661	1.50049			852.651	250.292	0.348071			605.159	-329.799	1.01197
	620.998	279.519	1.27616			326.295	-41.1211	1.28929			593.322	-9.4408	1.14089			332.762	-122.93	0.458353			-19.329	-170.118	1.17943
	879.926	-134.73	1.51532			383.874	-124.153	1.33522			575.108	86.659	1.20132			1121.68	381.208	0.279717			634.457	-243.308	1.06215
	866.97	137.542	1.25363			1117.55	170.713	1.36682			363.305	19.3193	1.39965			298.28	-123.311	0.466863			597.592	29.1454	1.06106
	683.29	-247.051	1.51392			1112.62	37.3815	1.38397			801.051	-219.038	1.13321			268.76	344.354	0.468018			354.129	-289.33	1.17526
	686.412	-211.222	1.24064			1076.58	-120.677	1.44368			891.309	-310.353	1.17255			357.167	-115.027	0.486629			604.891	-203.708	1.10752
	804.55	-179.261	1.1885			868.547	-337.073	1.44837			730.179	43.6904	1.1489			370.865	163.242	0.326271			641.393	-155.118	1.15878
	867.074	-94.7076	1.24227			1167.91	110.475	1.36341			695.521	-211.497	1.2952			1238.38	-94.7068	0.252623			108.902	-113.322	1.12022
	875.774	-194.503	1.48456			391.733	-155.677	1.22896			821.923	-176.492	0.898069			897.316	311.494	0.269971			-35.1141	-47.8455	1.14803
	668.833	140.675	1.40943			1160.64	224.769	1.55962			732.215	42.6104	1.36434			1184.89	-79.879	0.284845			660.497	-18.0103	1.0968
	848.104	-12.2083	1.26346			1283.28	199.955	1.58482			192.614	89.5337	1.40531			-60.46	-309.97	0.457926			162.792	-92.6653	1.11958
	622.387	115.435	1.15878			1274.29	-303.985	1.62564			907.616	19.6096	1.16371			41.6932	83.6635	0.456903			554.523	-303.275	1.10523
	548.901	211.586	1.20173			1130.98	121.55	1.36324			540.744	61.384	1.25628			179.035	-202.253	0.396767			702.673	-190.07	1.07653
	821.279	-33.1761	1.2503			1138.03	147.368	1.52848			404.554	19.9997	1.20275			784.7	-82.5324	0.388645			211.698	-362.678	1.14217
	622.007	-172.388	1.44746			1120.28	3.14505	1.46939			224.806	52.9141	1.31324			423.252	121.831	0.355739			260.748	-262.597	1.19527
	701.781	-201.272	1.53045			847.809	214.237	1.37187			748.045	-170.898	1.24561			411.198	142.317	0.312279			196.339	-78.1418	1.10928
	67.8193	79.2236	1.47889			378.745	110.283	1.29224			538.195	-71.2343	1.11593			810.439	17.6391	0.377839			663.575	-52.018	1.03929
	205.603	-85.3661	1.35698			1111.6	245.219	1.34646			508.179	135.117	1.1948			279.255	188.523	0.379736			326.898	78.1938	1.14949
	546.371	173.728	1.39009			1187.99	40.6915	1.46019			499.389	-12.9968	1.18181			203.302	-43.1115	0.499353			69.3371	-84.4729	1.15039
	862.715	-37.9769	1.18115			580.062	-15.008	1.31435			229.037	-52.6204	1.29454			487.342	-34.0513	0.478916			-23.2406	-367.92	1.20065
	657.905	294.505	1.44432			1286.05	-38.531	1.47124			48.1775	-249.998	1.54455			378.685	-60.762	0.402349			368.031	-240.616	1.19788
	260.194	-167.486	1.39314			1047.83	-277.241	1.76247			444.773	-117.493	1.40505			798.055	18.4255	0.337448			633.017	-320.253	1.01204
	822.75	-207.698	1.8754			909.631	181.686	1.41635			334.772	225.002	1.59605			571.584	-13.6105	0.335791			110.221	-176.316	1.15905
	233.112	294.06	1.39706			480.149	12.862	1.27985			641.754	0.291526	1.22407			370.068	43.571	0.429321			236.866	-91.3474	1.13189
	166.75	-251.925	1.87874			829.535	-124.514	1.37777			1024.97	-211.79	1.06641			143.626	-249.557	0.393362			205.918	-167.204	1.15439
	108.809	-53.6809	1.49792			382.128	-100.409	1.29394			494.459	-125.897	1.18906			657.531	-14.0748	0.442058			-12.1401	-63.0038	1.09771
	858.078	3.24137	1.12333			920.327	-123.666	1.45481			231.561	-44.9142	1.24036			787.955	361.924	0.256669			627.613	-300.871	1.09716
	677.078	155.737	1.12409			1182.3	-269.011	1.54082			658.034	-207.377	1.40504			459.445	291.486	0.26817			532.181	-271.315	1.05076
	848.418	-196.407	1.11549			529.33	-179.964	1.23164			395.922	-37.621	1.11681			769.941	393.919	0.23338			335.724	-140.97	1.10691
	83.9741	-147.748	1.81375			958.735	-324.229	1.26512			543.287	-17.8483	1.26353			184.304	-138.987	0.40647			-55.3349	-19.6861	1.08824
	886.889	11.8457	1.2438			1114.48	86.4617	1.41004			1045.22	4.8887	1.11765			172.561	-116.658	0.407371			367.559	-352.501	1.09142
	716.724	-240.317	1.32916			811.611	224.999	1.30201			520.802	-195.588	1.28245			411.772	278.863	0.269478			-3.13373	-95.3377	1.15013
	856.314	-259.279	1.3024			459.612	14.9988	1.36679			888.192	-306.44	1.068			1153.83	-39.6222	0.259521			550.451	-316.617	1.09373
	298.504	-459.048	1.63033			1096.68	61.8873	1.35355			505.429	90.7327	1.1463			116.482	-199.723	0.401115			290.237	-285.319	1.17168
	621.191	128.139	1.54604			385.161	88.5166	1.31903			239.676	-155.78	1.1661			285.044	240.788	0.32409			80.8895	-106.036	1.11321
	765.105	-159.672	1.4343			444.897	-192.547	1.333			326.105	231.146	1.5064			1104.72	325.491	0.219135			89.3487	-12.3679	1.09148
	333.849	-401.997	1.56006			1195.32	-152.71	1.49441			684.266	-41.5837	1.05463			464.452	127.169	0.359209			597.236	-240.67	1.04189
	413.009	-178.446	1.63011			927.614	122.497	1.41434			697.248	-187.369	1.19931			679.878	-17.0325	0.3319			759.837	-122.798	1.03767
	748.381	-256.972	1.23059			902.868	-198.968	1.48071			606.497	-84.6171	1.13828			834.054	428.657	0.260693			490.651	-302.168	1.14646
	588.117	137.484	1.52032			521.304	97.0276	1.42461			452.016	-181.442	1.29747			69.0345	78.9902	0.38667			111.833	-269.987	1.22992
	1024.71	-111.057	1.37835			875.526	-142.098	1.39416			757.544	-7.38448	1.23894			628.596	-81.7712	0.309456			132.263	-367.864	1.1971
	570.636	-227.011	1.5484			1037.85	-226.085	1.5775			-88.7047	-87.7694	1.48997			667.68	369.576	0.215623			148.676	-294.057	1.18163
	447.826	-321.771	1.7328			625.389	-254.523	1.50005			932.727	-238.637	1.17421			646.154	-18.1729	0.341823			665.726	-52.6653	1.0415
	418.479	273.676	1.50052			783.851	-233.42	1.40278			521.208	-198.711	1.31454			784.985	378.445	0.215836			141.31	-367.274	1.1176
	581.393	-191.972	1.36909			920.438	72.4782	1.34333			406.824	-187.224	1.53539			1050.64	294.662	0.21069			295.202	-307.909	1.20182
	972.926	24.0766	1.28968			1105.24	-142.012	1.58946			269.051	96.533	1.38707			729.664	338.063	0.222242			240.669	-71.28	1.13341
	435.203	-83.9171	1.1502			474.568	192.69	1.34879			87.798	-0.816144	1.34549			682.909	358.076	0.238368			135.088	-135.319	1.16781
	976.124	-69.8763	1.39326			1053.44	-131.891	1.47897			114.057	368.595	2.10292			957.984	488.017	0.202137			147.57	-18.7851	1.21409
	504.545	151.9	1.17566			1075.69	-131.601	1.34729			563.474	-187.762	1.20653			1127.89	-17.9222	0.214868			142.376	-123.032	1.11556
	814.527	-101.193	1.35693			645.839	147.444	1.21445			668.828	-11.179	1.21889			173.145	-21.9701	0.355527			246.688	-352.826	1.14404
	692.761	120.925	1.36083			1057.39	67.2691	1.53988			265.752	-187.863	1.30723			1145.72	-9.00612	0.216469			396.402	-248.526	1.12057
	404.117	-128.813	1.46802			912.086	165.663	1.39996			487.211	-185.796	1.35542			162.944	-6.23278	0.386907			378.828	-351.765	1.09512
	130.222	310.747	1.33151			424.794	13.1251	1.1901			262.814	21.5247	1.36434			1147.68	-20.5597	0.226911			318.111	-205.393	1.13921
	924.845	-188.448	1.32703			508.155	79.6255	1.24476			25.5049	-56.3161	1.54428			623.101	315.666	0.202631			390.264	-137.423	1.06391
	114.781	-264.554	1.67075			1168.9	-288.775	1.56515			179.511	168.485	1.88082			454.456	400.979	0.219107			297.47	-140.855	1.13258
	780.229	-180.869	1.27279			983.115	214.13	1.43283			177.133	51.7789	1.37398			747.166	335.044	0.200765			-25.1226	-206.727	1.22332
	544.998	305.806	1.22842			702.594	-14.6646	1.42704			322.704	-35.6802	1.28985			920.858	176.184	0.259761			238.668	-360.917	1.10726
	94.1701	-263.26	1.88772			581.461	106.188	1.21783			212.507	-172.377	1.31952			483.741	389.784	0.186821			529.481	-228.52	1.08604
	75.0386	54.3256	1.71241			1164.41	137.745	1.40647			84.8319	-258.737	1.27539			627.166	338.176	0.193232			333.889	-105.714	1.10303
	509.782	-158.285	1.36795			902.265	-164.812	1.47513			589.207	14.0591	1.1992			1073.76	28.2318	0.194735			1208.08	-273.188	1.18547
	484.882	-219.722	1.40954			836.077	209.336	1.3454			586.666	35.9036	1.12529			103.876	270.625	0.22163			415.092	-270.62	1.11602
	927.075	48.4181	1.23583			960.181	-256.955	1.59573			118.666	136.04	1.57609			856.891	181.886	0.221196			606.316	-248.885	1.04594
	705.399	-340.858	1.20666			640.959	7.30477	1.23204			174.31	21.3873	1.37154			112.315	-57.7228	0.461792			189.162	-364.149	1.099
	223.282	-156.873	1.39461			908.477	-244.497	1.42103			992.5	25.1296	1.25542			1008.41	304.815	0.176261			361.047	-346.628	1.15279
	897.525	-81.2764	1.4329			304.156	16.7049	1.25342			485.154	29.2522	1.23369			981.638	-32.1633	0.209443			554.518	-66.0654	1.02006
	107.441	296.268	1.36286			728.687	-189.129	1.33592			190.876	-108.615	1.42233			125.727	331.321	0.220169			346.052	-159.158	1.13018
	732.68	-173.365	1.50453			339.766	-123.63	1.32699			410.982	-200.498	1.302			848.73	80.5332	0.233626			42.5555	-250.874	1.18282
	931.852	-11.3331	1.23699			991.639	37.216	1.43659			262.326	-93.8647	1.45518			664.012	-82.87	0.260168			396.115	-245.781	1.1214
	379.234	-181.73	1.39757			634.576	-21.2141	1.3909			138.543	48.0297	1.28606			633.05	183.644	0.226662			169.645	-312.763	1.1941
	725.14	143.324	1.18491			1261.83	-208.025	1.71309			540.977	58.2123	1.34723			224.052	-166.204	0.239798			320.942	-124.268	1.07905
	454.737	93.906	1.21642			815.012	-105.296	1.35843			90.2659	-204.824	1.38682			1096.13	-37.1894	0.191404			330.874	-178.378	1.13605
	360.309	124.059	1.40825			775.838	-140.923	1.38933			496.841	-126.992	1.11471			308.964	241.354	0.247224			311.652	-341.086	1.18064
	928.866	-232.631	1.41544			1283.27	34.1683	1.3455			515.997	-123.921	1.15124			546.982	188.552	0.20472			236.808	-73.9091	1.1046
	925.964	-232.103	1.26682			1284.43	108.32	1.78943			-95.5095	-74.9473	1.69533			142.95	348.156	0.202079			312.64	-248.631	1.1391
	387.663	-178.378	1.51328			740.403	-292.996	1.3955			817.661	56.5386	1.06134			956.115	-36.9651	0.194146			46.6292	-319.219	1.28601
	455.877	-175.989	1.30186			991.102	-253.097	1.46104			392.566	-11.0531	1.25703			820.502	90.6324	0.221138			622.742	-82.4261	1.07374
	499.548	218.431	1.36732			768.505	130.531	1.40285			802.05	-16.4501	1.19313			234.267	-174.798	0.251982			118.679	-368.751	1.19204
	842.869	-23.0536	1.25464			1204.5	-135.93	1.44708			468.659	-276.947	1.39003			294.781	-193.434	0.216987			261.075	-185.372	1.13995
	851.248	98.3866	1.15802			499.053	156.696	1.2216			14.1083	7.83516	1.43338			310.755	-250.457	0.213484			46.7478	-190.42	1.15196
	367.673	242.772	1.35602			410.624	-146.082	1.42262			77.1072	103.018	1.46342			310.578	154.07	0.249159			517.12	-267.657	1.06429
	883.712	-178.348	1.32406			741.12	25.8145	1.32959			252.434	-86.1608	1.3586			877.684	156.222	0.196938			186.047	-260.968	1.20563
	322.743	284.261	1.21252			1265.57	198.326	1.62484			209.286	-23.4089	1.29045			584.178	193.306	0.232921			236.304	-257.341	1.15088
	855.471	102.566	1.34743			1215.18	218.077	1.49345			432.113	-90.9173	1.39362			915.52	-46.0152	0.204573			-13.2051	-181.011	1.21382
	32.2106	-2.19653	1.51523			1262.66	70.2041	1.56952			616.357	-158.189	1.20213			88.0571	214.247	0.20056			180.236	-194.976	1.17332
	387.995	275.447	1.19353			1187.64	167.068	1.44858			794.219	-36.3472	1.1059			344.057	178.138	0.213201			251.188	-194.346	1.15223
	648.155	214.093	1.14931			1026.1	-261.694	1.60316			47.0618	-262.882	1.30525			528.977	184.629	0.188781			519.526	-316.401	1.0934
	36.0954	212.999	1.27042			411.235	19.4809	1.43628			382.687	-149.351	1.48851			891.298	256.983	0.153632			80.9989	-155.905	1.16325
	460.103	32.0632	1.12545			1271.25	-220.243	1.45131			199.247	-136.38	1.42224			488.033	297.182	0.177463			288.991	-178.035	1.14077
	219.323	285.694	1.47002			1154.35	258.672	1.44553			171.557	-163.575	1.24813			154.599	33.6315	0.236912			401.926	-304.141	1.12941
	267.722	-230.603	1.85421			1098.92	159.521	1.39062			272.321	-13.0778	1.29526			421.449	191.785	0.249065			433.802	-150.231	1.08627
	754.706	137.468	1.29235			1011.02	-46.2899	1.45726			279.394	-145.492	1.30287			317.495	-239.227	0.20897			-18.2209	-283.969	1.181
	743.453	240.929	1.25058			948.383	-3.93577	1.34734			186.925	133.391	1.32509			116.105	197.157	0.212664			379.005	-306.77	1.16088
	785.206	-233.254	1.56063			962.701	116.009	1.52721			700.456	1.42367	1.16794			125.156	208.611	0.23762			348.027	-290.958	1.13416
	188.444	-137.178	1.29366			492.361	-38.8621	1.39026			194.53	176.996	1.94413			652.918	282.628	0.153387			334.198	-255.696	1.1533
	532.478	232.145	1.46037			961.707	150.271	1.33458			1043.23	4.58	1.00323			961.82	183.736	0.185095			213.891	-214.032	1.16891
	600.641	-315.354	1.29591			877.293	-160.798	1.41221			258.597	78.1807	1.23663			802.806	310.339	0.153782			630.269	-191.475	1.07551
	615.72	-117.064	1.199			907.077	-116.49	1.52385			469.752	-104.998	1.16251			981.494	233.566	0.163397			275.051	108.385	1.34242
	246.267	-150.946	1.62079			1022.6	-223.629	1.52607			410.583	-201.935	1.28484			435.391	-91.8907	0.213521			417.398	-200.326	1.13468
	738.334	0.258844	0.877251			631.817	20.4393	1.3063			480.476	-228.306	1.12457			276.771	-190.097	0.189051			256.374	-359.761	1.08622
	108.017	-171.651	1.69305			682.643	123.315	1.37083			470.634	52.1758	1.38355			282.013	-199.304	0.183467			111.32	-251.759	1.13523
	96.6009	-288.629	1.51379			980.299	-275.695	1.52101			320.765	-108.127	1.1294			572.818	137.593	0.176848			332.843	-344.862	1.14853
	851.377	-57.1957	1.12879			1216.8	174.871	1.73048			222.827	-106.991	1.39891			904.877	-30.6641	0.16328			109.621	-208.055	1.19136
	125.858	180.635	1.58703			1139.44	-142.665	1.43058			287.541	-177.049	1.33746			130.591	-40.6354	0.179249			160.18	-191.953	1.12697
	928.7	-217.726	1.48988			592.316	-41.7365	1.30829			88.4191	68.2637	1.36778			1025.65	163.997	0.125398			21.2395	-325.18	1.17712
	547.825	89.0532	1.2689			1097.22	122.638	1.49068			96.1413	-229.963	1.44862			112.51	21.6152	0.243543			508.014	-288.192	1.19672
	228.732	-196.602	1.4121			1239.65	104.895	1.52552			541.736	-15.1308	1.03464			378.303	278.162	0.171501			461.226	-228.525	1.10979
	748.301	-130.409	1.2172			610.969	165.579	1.47938			471.556	-254.408	1.22936			126.149	-24.2714	0.212718			331.598	195.173	1.46984
	908.149	223.324	1.18892			1004.68	169.939	1.58579			129.97	-18.4682	1.21392			495.29	101.007	0.1483			74.0894	-215.627	1.17357
	673.84	183.999	1.109			812.895	214.972	1.32642			497.986	51.6793	1.23382			775.668	312.909	0.144103			626.089	-212.335	1.0464
	380.852	99.2821	1.31785			980.016	83.8751	1.42366			318.706	189.702	1.41307			275.866	59.6205	0.151268			402.745	-332.49	1.12205
	923.034	48.0582	1.0371			1273.09	166.567	1.58036			297.493	-167.363	1.28031			417.213	-74.652	0.185257			213.821	-257.337	1.10337
	575.781	-124.341	1.39449			1219.5	142.98	1.50184			429.679	153.322	1.59703			119.871	216.529	0.166591			98.607	-320.31	1.2129
	837.588	253.645	1.27649			411.558	-120.689	1.33561			358.562	45.2033	1.31334			773.192	75.4057	0.136622			157.51	-249.182	1.13318
	668.266	-255.616	1.50514			1145.19	249.163	1.45347			74.8226	62.0019	1.2937			758.13	272.261	0.123816			371.926	-157.932	1.04884
	852.981	-54.2743	1.26452			813.881	-229.362	1.52057			446.681	-113.924	1.17581			1148.2	-84.9215	0.100934			326.044	-282.897	1.19106
	844.998	-114.958	1.37873			539.169	-93.9225	1.25738			723.904	-94.8809	1.09282			574.903	261.998	0.148512			483.133	-332.949	1.04447
	1074.57	-107.291	1.19538			866.357	28.4643	1.38216			476.718	20.3741	1.14663			60.7943	53.0463	0.196365			545.033	-193.324	1.09901
	172.897	-194.409	1.98529			807.387	-34.1884	1.39225			100.194	-132.047	1.6252			460.406	-263.908	0.128708			259.715	-305.482	1.14946
	189.369	-242.76	1.60394			1203.29	-121.022	1.52342			332.643	-57.503	1.40337			874.259	183.573	0.0972419			447.289	-301.838	1.14306
	338.367	198.971	1.27349			914.026	-63.3622	1.32977			181.133	-167.97	1.59672			774.851	29.9946	0.119808			418.66	-220.429	1.05763
	458.417	57.9829	1.28291			913.606	-102.391	1.44724			231.101	-210.132	1.51916			821.84	-33.7951	0.117835			44.165	-285.67	1.18647
	661.25	-175.204	1.3848			926.903	143.729	1.36866			426.712	96.2325	1.27454			294.146	24.4438	0.131463			89.0314	-235.599	1.14689
	669.401	213.442	1.13599			832.653	98.6063	1.47484			167.365	-148.737	1.62937			228.895	66.3336	0.125911			116.077	-334.773	1.14997
	994.3	65.8082	1.12175			997.803	206.223	1.49185			759.948	-8.01392	1.09263			137.015	251.845	0.163068			102.096	-358.465	1.16394
	810.276	-233.177	1.38259			1283.94	-89.6634	1.46892			451.491	-61.4732	1.2268			-54.6401	-279.594	0.122345			50.6752	-212.722	1.17763
	284.635	-312.218	1.71622			304.144	87.6714	1.21407			46.3178	-263.147	1.46133			240.75	159.833	0.110181			-15.3044	-217.475	1.15574
	922.647	-211.572	1.30228			950.546	-213.038	1.43405			154.183	-37.7338	1.38485			479.597	-495.318	0.0608895			860.305	-26.8618	1.22162
	516.661	156.477	1.39905			775.028	175.089	1.35761			191.495	-110.682	1.33091			614.239	-32.5199	0.0854707			447.531	-319.699	1.10696
	188.986	264.808	1.50012			692.388	38.5001	1.28408			140.971	45.6195	1.26918			573.466	305.659	0.0673031			-26.917	-290.441	1.23588
	811.193	-18.6515	1.16537			1195.18	-210.474	1.30297			644.379	-38.463	1.13533			368.513	-40.1273	0.0835522			363.944	-302.849	1.1362
	795.847	39.0337	1.15474			1303.82	-78.5644	1.41304			122.948	124.395	1.19714			808.746	341.329	0.0722477			220.581	-220.405	1.15817
	686.373	68.6584	1.09065			898.265	137.697	1.40233			77.0699	369.689	1.96763			120.452	-238.524	0.0655742			-6.43766	-321.652	1.19496
	707.072	249.172	1.19387			974.659	118.482	1.30583			34.7469	48.928	1.48072			261.172	206.911	0.0480784			236.593	-232.492	1.09919
	113.346	-111.068	1.49276			1138.45	227.742	1.70341			580.943	-30.3214	1.15673			130.674	-275.272	0.0512755			-5.14689	-356.197	1.12879
	793.235	3.9697	1.51881			1103.95	-260.83	1.59811			356.228	-94.7923	1.32918			753.875	235.275	0.0552621			34.7497	-324.891	1.20701
	755.601	99.3555	1.15267			1099.17	202.782	1.44673			532.936	-197.109	1.23518			111.489	-273.94	0.0501366			-12.7469	-353.952	1.14668
	570.954	208.213	1.06693			553.25	-209.231	1.37231			34.3081	376.517	1.89807			118.707	-293.466	0.0528763			221.21	-344.069	1.1168
	409.257	-298.286	1.72996			364.741	-46.4632	1.31806			201.061	-227.233	1.28477			202.549	186.333	0.0463786			-3.68171	-340.608	1.21364
	702.605	11.0854	0.804075			613.921	-69.208	1.34543			515.274	-126.034	1.19307			951.515	149.936	0.0453056			323.813	248.901	1.10092
	516.449	189.753	1.21957			760.653	-36.0822	1.24903			477.283	14.3238	1.21948			234.043	-124.662	0.0514974			190.393	-316.341	1.17225
	140.524	-170.539	1.58167			1161.28	178.922	1.42194			198.772	-107.749	1.17869			412.892	234.053	0.050449			83.8024	-315.121	1.19516
	367.545	272.19	1.16858			1159.88	-264.72	1.60641			332.333	-69.6295	1.32476			1058.44	-67.34	0.0318742			317.454	45.021	1.1185
	934.321	-188.821	1.42391			1228.79	-81.4319	1.539			288.862	-173.088	1.3293			229.12	129.651	0.0325292			73.6319	-244.059	1.16644
	941.709	-87.8276	1.3044			910.054	76.7657	1.32626			242.499	-126.113	1.08432			891.021	-83.8254	0.0303942			-16.1117	-339.694	1.18173
	398.839	254.757	1.36421			458.302	170.795	1.28795			275.163	-34.102	1.32906			777.031	119.858	0.0286565			460.132	-260.505	1.11335
	545.469	-154.352	1.76908			964.97	161.411	1.50916			581.918	-108.133	1.3857			592.086	-120.923	0.026929			92.9438	-369.146	1.10585
	577.053	287.109	1.17025			584.654	72.1555	1.39395			724.312	283.166	1.30276			16.7981	8.81	0.0421589			140.204	-345.644	1.16123
	534.034	-385.35	1.86714			613.958	-231.996	1.34208			91.2935	77.4893	1.42734			247.867	88.651	0.874021			401.122	-70.8689	1.10282
	506.513	-287.159	1.48469			1080.14	-19.2778	1.43541			482.658	-59.2806	1.2584			130.807	-163.658	1.3112			56.2866	-334.387	1.17455
	301.199	-423.79	1.85854			1091.78	-255.157	1.49813			363.888	-179.006	1.37528			63.6976	77.0995	1.00742			281.404	-334.898	1.19526
	477.233	218.162	1.19174			884.184	125.07	1.43256			53.1489	-65.8653	1.56083			735.726	122.617	0.775327			870.378	5.16346	1.29997
	639.512	212.459	1.26326			801.228	-121.542	1.33309			121.126	-65.0589	1.46323			737.7	122.339	0.728516			295.213	-319.608	1.17409
	571.925	254.468	1.27261			1216.6	11.1459	1.45099			431.457	-70.8462	1.21081			440.292	-69.3188	1.31515			220.951	-125.232	1.40863
	720.501	153.064	1.24146			979.458	199.231	1.5533			248.964	-188.742	1.43615			794.126	183.991	0.773558			-3.09132	-275.261	1.14192
	172.394	336.147	1.11471			1293.96	-98.4932	1.40992			514.862	-9.22135	1.38841			1010.11	77.8005	0.841502			-4.78534	-316.356	1.13904
	722.108	-184.588	1.34997			460.042	-6.34756	1.40679			361.338	47.7569	1.35506			397.023	168.182	0.660004			369.108	91.7979	1.38676
	247.331	-175.649	1.62179			1214.5	62.8977	1.4062			684.853	-44.7357	1.16779			574.552	372.9	0.57376			35.8581	-234.23	1.15487
	661.76	48.933	1.31799			1074.11	65.7487	1.30292			145.463	-186.68	1.15396			672.902	82.8242	0.790922			769.126	56.7251	1.23764
	783.927	-15.8207	1.23641			861.563	186.345	1.42145			181.866	-168.456	1.47308			114.586	60.2047	0.909891			496.208	37.0285	1.34839
	641.391	191.994	1.20383			511.388	13.9078	1.25041			405.372	-54.0272	1.3123			230.532	10.8333	0.966325			168.5	28.7766	1.48752
	764.426	-110.553	1.36429			413.945	-70.3148	1.20361			681.095	-103.149	1.14083			208.366	24.9458	1.05477			141.073	-310.626	1.11528
	843.464	-112.181	1.32656			1157.26	16.6432	1.40747			83.0784	-5.87755	1.47465			674.69	132.156	0.634778			232.517	-328.057	1.11898
	786.49	30.3817	1.46035			745.883	99.2829	1.33499			469.43	-104.089	1.05126			160.92	2.62433	0.951599			551.361	13.2044	1.30515
	139.071	-267.287	1.7742			951.85	-281.776	1.56229			154.501	-31.3576	1.37146			72.8167	6.73224	0.861729			575.463	-89.7992	1.27848
	898.88	-190.557	1.17683			845.023	63.8924	1.31591			356.925	-268.419	1.23785			1225.59	216.985	0.503195			324.178	-217.6	1.13002
	399.915	318.643	1.22118			970.802	-146.154	1.44222			79.6977	-172.739	1.12625			87.5728	101.101	0.808382			26.6376	-355.872	1.14216
	822.02	-33.66	1.32933			1127.3	-34.4919	1.44756			106.849	-263.103	1.19824			156.893	-9.52293	0.934747			69.6352	-337.958	1.14646
	516.679	-83.5863	1.34435			1291.72	-173.951	1.60228			416.767	-134.41	1.11054			1019.36	86.8535	0.625768			683.253	-42.5007	1.21782
	750.81	44.4287	1.32456			1243.52	-0.640694	1.48694			194.369	-29.7989	1.22045			211.024	-26.9236	1.07136			734.045	-15.6473	1.3032
	577.001	169.538	1.24832			665.742	-262.088	1.39203			76.0139	103.616	1.49365			911.123	236.561	0.774566			353.49	-98.8899	1.3063
	876.943	99.7747	1.08331			928.786	2.19948	1.34154			218.491	-190.778	1.37292			669.542	80.842	0.665036			60.7314	-367.841	1.126
	633.062	175.062	1.19892			652.893	51.3742	1.28881			28.5112	-49.0673	1.4788			87.5424	96.1746	1.01645			525.931	-230.158	1.17316
	761.849	-171.194	1.33762			669.243	-45.8688	1.2581			613.331	-13.3889	1.14221			316.002	172.516	0.540334			559.385	-87.3946	1.22103
	183.091	150.534	1.59371			844.169	-6.349	1.38469			87.5941	43.8584	1.31928			137.938	-102.879	0.610619			122.327	-349.498	1.07491
	368.986	160.902	1.46716			365.703	8.20418	1.30916			55.0898	-63.0205	1.19297			258.309	-112.597	0.676742			84.4298	-19.4524	1.41554
	872.785	137.232	1.34293			1040.78	-202.255	1.53695			224.652	-79.0889	1.32839			809.726	206.073	0.551611			564.242	-18.0438	1.3512
	489.91	-145.478	1.33733			445.524	10.0303	1.23632			444.77	-116.032	1.33525			81.9855	29.4613	0.802291			95.0093	-80.5088	1.72697
	886.61	45.8306	1.11636			1029.58	34.7323	1.45329			436.428	-104.507	1.29028			253.594	-92.6382	0.710414			536.863	-75.9326	1.12436
	168.507	-188.529	1.73669			1200.25	-259.332	1.48073			739.471	-13.3487	1.19035			262.847	-92.1071	0.684353			177.114	-6.3398	1.51535
	409.731	288.104	1.36898			445.667	-14.5921	1.32561			145.592	-142.377	1.30854			499.619	-153.597	0.76883			388.062	-212.729	1.08236
	854.809	99.5856	1.47043			741.429	35.3846	1.35661			657.77	109.596	1.17167			757.006	-262.184	0.52199			439.143	-137.184	1.39119
	523.213	-312.847	1.30296			846.394	116.45	1.3371			319.578	-84.9931	1.26434			68.5993	37.9451	0.771587			495.437	-163.177	1.43284
	194.583	290.284	1.2866			866.139	-118.539	1.3562			70.6431	-210.694	1.73339			659.958	-296.846	0.634679			117.578	-52.9699	1.72976
	402.776	286.92	1.1495			416.033	-8.23653	1.35935			321.812	-144.309	1.14437			117.436	64.8903	0.68558			281.019	-51.4688	1.46984
	206.618	-163.587	1.58623			857.654	42.7457	1.25598			226.786	-134.19	1.11458			282.439	-72.4581	0.693396			740.17	-117.759	1.54927
	800.837	-103.961	1.25391			450.415	-220.115	1.37046			198.896	-271.11	1.36448			164.316	-135.701	0.600354			468.023	-25.0126	1.4296
	615.89	-470.383	1.23626			950.289	-252.732	1.66434			90.928	-41.2275	1.46644			223.029	158.383	0.578754			669.165	-75.8795	1.38255
	872.898	-99.0821	1.38489			1107.5	-430.953	1.53221			-71.0194	-67.8122	1.46221			308.851	164.223	0.42996			423.598	-181.849	1.4227
	195.891	193.721	1.35194			1003.95	324.698	1.36948			593.865	-86.0629	1.1053			237.41	-130.957	0.493225			592.736	4.46452	1.31308
	821.478	-145.454	1.3248			578.742	-157.896	1.34453			645.786	-39.8394	1.09466			457.819	-315.918	0.537714			684.719	-174.575	1.23025
	369.978	-124.764	1.53084			918.67	33.5804	1.35597			355.68	113.585	1.26161			282.494	175.775	0.384302			550.459	-41.0196	1.30234
	167.429	298.886	1.49194			1053.47	130.077	1.50612			322.387	15.3503	1.20403			364.735	176.483	0.364835			64.3511	-24.2558	1.64501
	773.356	-188.222	1.30547			780.403	-123.17	1.37251			108.739	79.9624	1.25005			1021.38	112.864	0.301227			497.284	-38.2072	1.29634
	277.851	-217.974	1.59065			1124.42	190.099	1.46431			626.807	-72.6159	1.03049			394.822	-146.382	0.368337			353.658	-157.356	1.41257
	534.886	-207.342	1.46219			1169.09	-322.806	1.62129			332.141	-59.1543	1.3395			105.549	113.898	0.36106			334.495	-216.087	1.31086
	348.69	-94.1288	1.43026			763.953	-229.309	1.48483			224.708	-89.674	1.19999			101.646	31.8561	0.46355			312.574	-178.309	1.33781
	421.307	-176.398	1.59027			847.958	-123.937	1.36286			77.8239	160.959	1.48053			402.543	-180.152	0.321085			512.978	-123.052	1.32598
	76.8081	53.06	1.45829			852.17	-104.844	1.48905			419.604	-135.826	1.09983			307.736	164.348	0.196003			499.229	-143.724	1.44511
	818.355	56.6852	1.2189			1272.63	-25.1922	1.43807			99.4122	-135.921	1.28991			211.373	104.756	0.178317			475.034	158.081	0.853535
	458.94	-276.237	1.7699			353.964	68.9343	1.09014			125.84	-174.791	1.37547			1155.18	333.582	0.075744			387.969	81.7333	1.58864
	766.809	65.9089	1.17338			557.748	-133.278	1.56488			295.418	-69.7295	1.27221			275.164	-137.943	0.0827129			531.649	-101.763	1.26243
	113.743	144.171	1.42264			923.38	-181.122	1.44414			544.195	28.1787	1.13563			232.967	-124.639	0.0679259			341.052	-55.1082	1.34783
	784.986	-18.0773	1.44927			492.058	-115.746	1.35847			237.639	-16.7845	1.28009			220.103	-265.998	0.722213			413.776	-75.3179	1.95271
	655.089	216.475	1.22668			1142.72	22.3743	1.50707			109.109	79.8285	1.26612			860.74	-210.383	0.682474			257.423	-26.41	1.46312
	603.331	-246.76	1.23389			520.295	-150.861	1.27684			365.541	-110.435	1.24805			15.0433	-0.13354	0.538781			437.561	-37.0098	1.11067
	620.776	-148.761	1.3953			695.501	-164.535	1.39277			169.909	-15.7967	1.36043			659.193	-270.638	0.654848			404.097	-5.50319	0.954264
	494.989	220.204	1.39786			479.749	171.141	1.2191			265.502	-146.678	1.16007			258.874	309.156	0.562476			393.834	-37.7744	1.49546
	434.026	205.197	1.28924			690.11	-146.08	1.41202			305.705	-225.887	1.28875			478.51	114.081	0.619999			264.949	3.80059	1.07803
	404.455	207.556	1.30931			817.934	49.9811	1.32816			258.542	79.9346	1.2122			572.088	307.624	0.609423			412.568	28.2524	1.68099
	498.866	217.085	1.37887			830.438	177.729	1.58172			463.077	-78.5614	1.06921			764.914	307.381	0.791384			399.199	-20.9942	1.33833
	79.4257	201.647	1.28435			415.59	-92.8405	1.34241			787.585	-27.6858	1.08923			533.337	-262.867	0.515751			198.271	441.005	0.597391
	61.5755	173.034	1.38049			1209.48	-60.3677	1.47355			497.415	-198.301	1.2034			535.221	-229.715	0.568197			351.074	39.9557	0.886699
	481.766	-139.259	1.4684			1090.25	109.468	1.57007			518.642	-154.248	1.45977			7.47081	1.51062	0.497162			304.549	9.97576	0.871149
	221.538	282.635	1.41632			1283.7	89.8309	1.39073			204.836	30.5878	1.14664			1233.62	-329.728	0.51913			346.586	18.0799	0.972264
	487.314	213.944	1.22869			1274.98	0.0158956	1.73471			94.2609	-99.357	1.65011			1189.87	147.254	0.660823			348.087	-0.529897	0.827114
	497.246	242.25	1.22617			1034.98	150.885	1.47834			-75.8762	-23.0483	1.14569			1187.3	-139.422	0.557988			459.666	-47.6502	1.76282
	740.547	42.3061	1.23503			485.074	-136.354	1.33726			322.017	35.8657	1.17749			1233.96	-158.227	0.548379			316.818	-13.3714	0.732982
	339.339	277.387	1.49879			654.828	-117.647	1.23188			299.237	-121.461	1.21595			548.022	223.309	0.638144			283.608	18.5526	0.733864
	939.572	-185.957	1.32104			801.382	-176.642	1.47165			84.9026	31.5097	1.62182			347.283	304.139	0.490972			1153.32	-385.302	1.02061
	771.031	-189.224	1.17053			395.943	-86.0488	1.29865			463.882	270.019	1.82507			251.695	-62.6527	0.55011			1179.87	-302.766	0.998996
	480.338	12.2445	1.29137			1122.8	218.119	1.60655			79.5705	-171.78	0.895874			754.801	-8.81331	0.748944			81.2213	-383.766	1.09837
	186.431	187.195	1.32424			1200.06	28.9007	1.52897			552.078	-53.3355	1.04746			1253.18	-316.376	0.521091			1233.89	-135.564	1.00556
	770.85	-35.7829	1.25855			913.432	154.572	1.54648			375.475	-22.9702	1.18583			432.416	-261.981	0.540407			1252.67	-77.686	1.03638
	372.462	-93.7871	1.86809			768.725	208.78	1.30312			114.079	-101.107	1.65797			877.009	-149.511	0.638704			92.8662	-379.756	1.0856
	588.021	141.973	1.30893			482.561	44.3087	1.10026			560.681	-127.769	0.92707			690.603	-78.5021	0.601944			1261.46	61.3151	1.0118
	361.921	196.294	1.5717			1201.25	39.6165	1.35616			144.159	-142.036	1.22719			146.301	166.401	0.448266			1275.11	62.0412	1.00933
	482.34	50.3913	1.45728			1051.84	44.5198	1.36019			561.043	-10.504	1.01597			169.997	148.321	0.499662			1247.11	0.270923	1.02198
	287.308	-168.388	1.45436			506.371	-56.3029	1.31835			527.29	-150.345	1.24064			535.076	-44.4439	0.562889			1119.29	-221.575	1.05891
	311.218	-464.163	1.85845			968.072	37.1602	1.5043			350.07	-132.027	1.06807			-5.60184	-56.3163	0.472644			1120.92	-135.185	1.10895
	453.558	-218.113	1.57938			1027.7	45.2268	1.33398			86.0499	-81.972	1.40845			691.915	211.33	0.642961			12.2586	-296.591	1.14174
	657.646	154.329	1.28808			1003.64	-128	1.47969			163.886	190.118	1.4026			234.551	-63.5122	0.503524			719.257	-425.19	1.07394
	646.828	251.107	1.39385			1091.13	-148.551	1.46065			713.093	-24.1282	1.14551			650.009	213.751	0.555894			933.171	-266.306	1.08225
	802.541	-208.465	1.19262			1280	228.015	1.43751			459.222	-40.4065	1.31955			750.518	98.2427	0.593479			721.897	-389.655	1.06504
	207.215	150.398	1.43557			853.923	-141.28	1.4233			291.905	-83.07	1.41258			260.059	57.7619	0.486832			-112.409	-204.644	1.21999
	619.698	-113.216	1.43748			721.452	-88.2939	1.32345			264.64	-147.867	1.32113			678.295	262.406	0.603596			75.2775	-297.395	1.12746
	812.802	-99.4263	1.16429			1187.66	28.3525	1.51105			657.614	111.133	1.30076			684.293	7.75805	0.50023			-151.172	-92.8581	1.24418
	587.297	140.354	1.42996			655.311	-203.488	1.48274			493.227	-18.2511	1.03256			912.072	-80.6691	0.480729			328.828	-269.196	1.15647
	577.971	205.377	1.38208			1069.19	27.0314	1.39881			324.687	-129.597	1.54762			803.288	365.12	0.563739			597.127	-316.357	1.08201
	650.044	253.139	1.41019			1161.49	-5.56787	1.47319			51.3725	-143.88	1.68168			206.884	-126.662	0.478732			1047.83	-2.61442	1.054
	894.759	12.065	1.47755			1014.26	1.45083	1.5262			414.52	80.8942	1.09864			650.499	317.522	0.515001			860.48	-286.394	1.10097
	826.511	71.679	1.67067			683.158	110.158	1.30383			410.66	-119.202	1.2359			140.937	255.792	0.457144			318.071	-268.202	1.14828
	972.744	-126.959	1.37631			999.252	107.473	1.67935			622.365	-128.363	1.17993			1193.32	-70.7747	0.53013			13.1146	-149.634	1.11486
	674.214	-161.552	1.27133			1148.05	-20.1676	1.4721			237.674	-158.877	1.19913			733.737	205.769	0.558318			896.906	186.854	1.05524
	884.953	4.23698	1.42752			1125.53	-96.7177	1.43741			-76.7867	-22.2807	1.34915			272.844	-127.861	0.494165			1139.11	-66.5883	1.28129
	44.3991	283.245	1.49578			1054.94	11.2233	1.46955			-95.6207	-39.86	1.3607			230.053	-49.092	0.490589			1024.27	108.814	1.06303
	763.561	-170.021	1.36421			591.548	-105.947	1.45342			170.893	-111.319	1.58999			773.002	321.777	0.584331			1105.97	-50.4983	1.34422
	429.496	204.981	1.35638			1241.42	130.28	1.41535			624.299	-130.644	1.1897			167.159	35.5298	0.503433			1019.49	98.8586	1.08246
	636.167	-139.543	1.36314			301.067	-28.2516	1.24277			-82.5981	-33.5506	1.25527			909.106	-163.221	0.455576			635.891	-297.179	1.08492
	145.262	-99.0155	1.79913			885.593	188.403	1.4463			649.21	19.0668	0.990589			511.572	60.1342	0.49775			-67.7086	-98.0301	1.23398
	805.152	-206.908	1.21236			861.99	-307.281	1.37025			142.283	-86.7776	1.62673			720.641	-142.663	0.476786			-120.512	-10.2228	1.225
	152.114	141.113	1.46402			663.805	-126.525	1.31036			994.877	-10.0583	0.103995			754.741	-119.765	0.539515			545.723	-551.486	1.3188
	117.409	-147.585	1.98274			893.047	91.7233	1.45365			266.254	-43.0526	1.27814			97.402	-220.824	0.407802			168.161	-192.993	1.12017
	578.954	231.834	1.16664			969.177	22.56	1.41836			444.105	100.602	1.10502			636.119	229.119	0.482643			954.495	-20.1659	1.07082
	506.412	-271.835	1.38584			596.325	-5.47847	1.15166			611.618	71.0305	1.40917			332.757	-126.047	0.453005			1106.9	-95.4011	1.36643
	742.259	111.779	1.2496			461.844	-51.1023	1.33756			1141.34	410.17	1.36582			531.796	-30.4317	0.409267			1138.97	-17.6875	1.31982
	205.304	235.482	1.31682			1171.78	281.184	1.62589			150.128	-144.678	1.42759			479.483	-145.562	0.470017			-73.7933	-7.05147	1.15616
	19.4204	297.864	1.67473			1253.93	-7.61695	1.3945			146.95	-145.135	1.34173			719.458	178.572	0.523055			37.9897	-128.658	1.19298
	636.126	174.174	1.1208			858.152	123.809	1.35345			269.853	87.2998	1.23803			814.415	-99.3644	0.483128			1087.46	-64.2526	1.32666
	8.66701	9.37712	1.37362			609.954	-21.2494	1.43731			1062.18	387.295	1.37262			721.076	234.551	0.521775			823.41	212.162	1.00298
	97.4576	198.878	1.37293			705.698	-174.612	1.33859			72.7379	-57.1559	1.06844			821.839	-173.886	0.508203			605.998	-259.937	1.10356
	499.968	-133.619	1.45073			303.691	-118.215	1.26799			1099.33	-359.896	1.55121			972.403	-135.796	0.45558			1128.66	-43.5354	1.28446
	710.074	293.641	1.3198			595.244	32.4205	1.24685			960.051	195.534	1.29199			501.898	78.3683	0.495964			91.3092	-226.752	1.8398
	213.85	-119.152	1.73105			1289.78	14.6456	1.6308			433.041	-159.637	1.18242			750.048	225.98	0.542786			901.082	-124.537	1.07741
	303.117	256.362	1.20371			1177.71	-28.2419	1.55417			370.562	-121.805	1.14611			899.431	250.816	0.499825			849.654	203.125	0.987418
	889.787	183.594	1.16222			534.78	-10.6607	1.28748			42.8633	-74.993	1.18144			698.724	-118.702	0.459796			7.26889	-86.7402	1.18728
	593.355	-187.926	1.56066			630.311	193.981	1.20651			190.474	-178.724	1.27641			257.088	238.16	0.448632			1040.72	-39.8982	1.30113
	372.335	255.487	1.17965			423.1	-120.414	1.3727			475.209	51.8397	1.096			110.822	42.1776	0.410319			783.16	226.023	0.987853
	879.457	-5.63187	1.33873			973.745	-99.4691	1.27946			1155.27	113.879	1.56288			278.02	64.629	0.446969			869.537	-44.5972	1.08529
	578.311	114.293	1.50145			1039.2	22.4992	1.54079			274.102	-213.131	1.25353			565.763	-56.4193	0.49847			930.244	140.085	1.08272
	265.851	218.972	1.56056			880.771	-224.611	1.5208			246.544	-270.289	1.04693			876.079	-99.5036	0.459169			802.875	219.234	0.987067
	297.055	-183.53	1.54296			1109	184.964	1.4433			1104.35	80.1965	1.46918			916.446	-379.807	0.396581			902.899	165.102	1.05138
	223.015	46.1755	1.31161			457.685	-117.568	1.52973			1112.74	103.038	1.6907			-3.39067	-95.9506	0.520651			286.769	-155.09	1.13619
	423.56	213.502	1.29378			1129.39	-0.847684	1.45455			920.867	162.979	1.27381			520.218	78.6268	0.542331			858.333	130.612	1.05321
	688.333	-127.956	1.33567			638.305	-148.604	1.46656			557.146	255.396	1.22731			645.13	182.956	0.50927			190.221	-108.66	1.17471
	753.957	133.432	1.36409			699.981	-83.2067	1.30812			1195.55	285.147	2.12324			441.234	22.5728	0.469519			381.425	-168.428	1.07959
	622.715	-171.865	1.35814			612.924	-4.4215	1.37167			638.037	-245.415	1.41834			874.389	-150.701	0.468297			913.623	79.7863	1.05147
	412.427	-166.426	1.71575			893.305	-248.638	1.42138			907.869	-119.788	1.49115			522.558	47.0321	0.481559			947.872	74.5771	1.05367
	442.364	270.159	1.33639			1106.93	-29.8635	1.42231			1104.07	114.28	1.52893			159.291	263.525	0.422467			541.277	-213.256	1.01136
	893.059	12.9193	1.23638			1167.37	42.3126	1.41373			500.654	-155.428	1.12682			152.804	33.4834	0.453119			781.3	-229.474	1.05435
	509.145	259.662	1.10073			1091.14	-54.2362	1.41672			1110.29	101.44	1.33653			450.365	-262.679	0.449704			673.071	-197.998	1.02017
	648.788	251.413	1.38039			599.896	-51.0121	1.32032			230.197	-90.3161	1.14524			713.519	21.7068	0.582045			765.372	232.148	0.983702
	665.592	284.146	1.11804			911.524	9.4596	1.38359			760.383	175.448	1.35784			1126.9	240.813	0.686185			855.718	-76.2177	1.041
	220.125	-339.937	1.52997			1270.98	43.544	1.69849			571.806	259.234	1.07103			551.989	77.0883	0.539209			772.883	-154.755	1.05863
	63.4834	259.614	1.46263			724.809	84.2896	1.29353			213.398	-136.378	1.09466			765.425	-158.598	0.459371			652.161	-215.163	1.03408
	147.496	-74.8244	1.39205			559.635	-118.28	1.33442			270.154	-147.973	1.09245			1040.87	46.4558	0.539144			592.273	-146.204	1.13104
	350.059	-138.427	1.40965			511.226	-0.81001	1.28166			426.949	48.832	1.20066			1103.97	416.817	0.507569			752.028	221.313	1.02892
	478.206	-253.293	1.70643			726.887	-140.97	1.41586			498.859	220.571	1.23547			617.103	-112.624	0.486478			-94.7387	64.0221	1.18121
	836.147	-170.301	1.24855			955.733	-141.716	1.29046			140.857	-201.439	0.962631			582.365	157.314	0.45098			545.673	-135.421	1.03602
	879.819	114.587	1.34233			934.573	197.33	1.3847			219.639	-155.491	1.23077			1143.01	-33.1312	0.533042			-94.1432	39.5433	1.18114
	442.776	-210.146	1.47127			1164.8	309.915	1.17512			677.156	-2.80484	1.28728			467.804	-28.7372	0.429656			735.893	99.713	1.0629
	324.506	-441.699	1.72036			1052.51	-301.237	1.60852			251.006	114.43	1.08677			499.335	-260.506	0.415348			748.735	237.878	0.994102
	497.142	151.555	1.4778			1145.65	110.506	1.49992			316.867	206.765	1.25607			952.377	138.764	0.521515			704.179	174.706	1.12057
	91.716	249.884	1.42086			1002.56	6.37248	1.45777			470.739	112.934	1.08672			1070.91	389.379	0.536539			653.963	270.513	0.990519
	892.514	-76.0807	1.29516			1296.77	71.668	1.586			844.984	36.4262	1.49499			724.282	168.355	0.47034			739.264	178.939	1.11336
	553.836	7.43095	1.30947			353.17	-28.4712	1.21264			905.876	95.4043	1.14752			152.86	-179.863	0.357179			182.681	-28.9412	1.12857
	351.579	-179.001	1.35206			560.098	-194.793	1.58089			157.738	21.4854	0.998653			1136.77	343.686	0.504401			611.521	-67.271	1.11281
	153.639	24.1973	1.3157			958.714	196.478	1.42938			1141.71	209.808	1.41928			919.756	268.879	0.516479			294.999	394.126	1.19448
	632.641	-348.176	1.49167			656.578	-25.2603	1.27514			187.642	-56.9376	1.43656			836.07	-156.41	0.413996			573.078	-435.994	1.41245
	327.994	218.68	1.39278			855.539	12.8866	1.40703			70.371	-57.1781	1.31879			592.876	63.0669	0.48798			544.056	115.272	1.1006
	77.7829	199.791	1.13737			848.413	-43.9172	1.40622			336.939	-112.004	1.13873			994.63	294.564	0.523755			844.244	59.7216	1.01408
	423.217	166.61	1.40612			1297.68	-140.99	1.39174			911.139	49.6268	1.41473			627.818	377.12	0.407955			774.438	192.79	1.07511
	677.226	71.5563	1.14514			702.449	-137.291	1.34			291.174	-175.292	1.17099			389.115	70.0366	0.406854			637.419	6.67427	1.11008
	165.795	-134.555	1.49391			921.252	-78.0174	1.45152			477.671	122.15	1.19189			671.13	-114.977	0.433116			-68.5045	60.4635	1.14753
	419.64	166.453	1.47673			523.922	-6.91306	1.29725			418.142	9.63172	1.15476			967.18	138.228	0.462167			790.595	124.047	1.08837
	990.808	-273.739	1.24223			327.348	-54.0909	1.2869			236.457	-85.6166	1.23246			590.922	53.2078	0.517179			578.078	225.312	1.10523
	395.281	-103.181	1.39999			1039.21	-144.373	1.47395			384.048	1.53182	1.29462			853.408	-155.371	0.423739			285.016	-47.1915	1.05208
	390.663	153.603	1.28901			765.584	37.7875	1.29944			481.946	-132.562	1.09378			703.014	62.3834	0.495381			-85.7695	65.2518	1.17383
	506.15	299.511	1.12837			621.116	-135.443	1.38103			408.569	-55.3964	1.10495			511.416	199.61	0.432983			640.989	-69.3669	1.09483
	407.821	217.413	1.19988			752.46	-65.2937	1.27223			584.812	-252.015	1.16221			501.036	-74.7782	0.54504			546.835	108.291	1.09909
	741.983	-0.972638	1.31192			1087.91	92.4548	1.62624			309.424	-155.039	1.34481			1124.64	375.14	0.503494			108.643	54.7509	1.16611
	197.163	155.083	1.72099			901.692	27.4771	1.32795			892.48	1.09477	1.38677			720.19	-81.0196	0.469486			765.741	128.464	1.05273
	686.317	128.156	1.20966			575.57	-106.323	1.32072			779.429	165.188	1.22581			1117.38	401.043	0.534173			581.427	295.492	1.01703
	274.219	-180.676	1.38074			885.659	53.4855	1.41922			606.044	49.1653	1.22533			891.996	-177.21	0.431518			654.711	236.335	1.11656
	280.959	318.204	1.2474			632.64	65.2973	1.31877			560.289	-291.94	1.02074			1002.47	-135.74	0.401215			546.444	307.538	1.0461
	786.42	-232.425	1.46368			532.838	-110.874	1.26122			352.75	-93.8135	1.12883			481.626	-7.38272	0.40264			689.855	-61.8478	1.00681
	284.843	-167.177	1.36243			871.903	98.6569	1.37411			719.829	72.5579	1.24317			568.749	66.7332	0.449416			708.474	237.752	1.03584
	351.064	-129.82	1.5109			1223.28	-279.998	1.55967			348.734	-303.371	1.13923			547.334	-7.28282	0.409158			644.99	75.5439	1.07524
	1000.66	-182.53	1.25218			516.87	-128.524	1.40569			153.628	-163.564	1.63559			150.716	-199.8	0.33266			778.545	148.1	1.04836
	892.858	-147.113	1.46091			723.28	-168.077	1.36768			733.503	-189.674	1.25552			497.987	-147.967	0.429366			774.761	-32.146	1.00676
	249.443	107.716	1.2462			1241.75	-71.1436	1.44773			1033.13	10.8463	1.3828			422.964	74.5854	0.420887			507.718	165.429	1.11035
	367.075	122.648	1.51383			474.217	-69.8384	1.17667			405.617	-179.516	1.16347			834.825	233.226	0.511983			559.446	-68.3472	1.05256
	195.07	-165.272	1.59536			1025.19	-8.50205	1.39005			307.368	-209.43	1.22846			800.147	-116.842	0.449832			-0.809171	217.688	1.20953
	387.495	274.606	1.28519			601.315	5.31253	1.23785			768.027	180.806	1.3842			958.113	117.151	0.484598			186.696	18.7715	1.11842
	656.344	152.272	1.28238			951.36	-42.1922	1.43752			444.368	-29.5168	1.12973			138.214	-214.895	0.325554			718.532	-158.501	1.03822
	475.206	179.358	1.29923			838.851	32.243	1.21367			1022.67	-114.754	1.51618			342.248	272.548	0.385252			33.9204	97.2436	1.16294
	731.22	146.609	1.29573			651.987	-100.252	1.34028			517.23	-213.352	1.21596			657.79	187.862	0.428723			526.22	195.909	1.14895
	479.066	275.407	1.40101			781.47	19.8281	1.47649			828.823	138.153	1.08396			886.515	-202.452	0.641343			564.417	61.232	1.05392
	864.855	-35.7799	1.28466			811.026	6.37102	1.28923			277.543	-211.105	1.06836			207.536	49.1329	0.399524			574.782	267.067	1.06726
	429.008	225.441	1.34172			1236.8	-46.687	1.60923			1228.18	-346.951	1.58754			718.501	169.946	0.451421			538.865	196.943	1.10523
	668.57	-52.3152	1.29721			861.377	-74.6439	1.36534			901.296	230.432	1.67451			885.277	269.733	0.5464			136.998	248.198	1.21294
	629.266	177.05	1.32755			810.319	40.8448	1.40682			584.851	-227.064	1.17221			759.77	152.077	0.422936			645.351	44.6	1.04999
	188.011	196.804	1.47061			993.061	-79.7891	1.45031			929.834	120.323	1.61318			457.307	-2.03469	0.451523			423.226	116.761	1.14559
	370.986	280.542	1.25293			1028.39	-104.913	1.60866			390.5	-31.8896	1.15692			770.792	33.4664	0.514115			571.773	249.583	1.1187
	732.679	-101.255	1.39006			972.634	-20.2369	1.43659			637.423	-217.127	1.33315			366.391	86.6358	0.403647			-46.9232	209.873	1.19539
	886.262	-208.288	1.28174			1196.86	-97.062	1.45034			996.165	213.071	1.4904			248.672	-131.362	0.355894			693.307	-247.136	1.18265
	700.877	104.258	1.34971			925.917	100.868	1.51856			418.415	-213.491	1.20139			375.693	142.429	0.397817			-43.2762	209.687	1.15683
	476.825	-163.931	1.36068			504.997	-21.5612	1.30985			326.459	-109.789	1.13498			815.171	167.803	0.486065			592.921	271.497	1.02482
	426.678	244.859	1.25001			792.761	-93.1366	1.64965			604.625	-225.259	1.46996			820.617	-157.251	0.384038			594.779	147.536	1.07665
	429.622	-32.2773	1.09889			1085.65	150.621	1.61131			1063.53	341.029	1.55402			1056.29	148.289	0.472839			182.014	30.004	1.1161
	541.969	72.3214	1.306			730.461	-113.765	1.50979			623.221	-115.147	1.39681			108.923	-195.013	0.312828			87.2759	201.241	1.17383
	793.222	-159.192	1.29937			442.352	-131.491	1.31351			668.663	-226.65	1.15755			753.529	166.634	0.41639			641.688	90.8574	1.06376
	705.059	59.0773	1.24318			997.911	16.2492	1.3499			598.875	-138.374	1.28717			933.539	118.204	0.465203			530.104	193.513	1.07891
	760.412	93.9401	1.24393			997.928	188.431	1.52909			602.395	28.6178	1.25072			751.262	175.063	0.458636			126.26	168.537	1.18797
	109.023	158.094	1.5138			698.515	0.109274	1.42394			753.34	60.9906	1.35653			223.149	-155.697	0.33892			467.38	227.136	1.2316
	826.02	31.6468	1.12505			1178.33	-101.696	1.51117			823.526	148.461	1.26882			834.73	116.886	0.461525			516.295	297.208	1.15081
	650.082	-91.4202	1.3603			533.733	-124.938	1.39077			574.254	87.9434	1.16515			783.167	-29.5905	0.440886			-8.54527	289.723	1.18473
	831.514	20.0097	1.20523			569.762	-79.1259	1.28901			544.529	-209.039	1.13274			1010.93	-242.907	0.405383			561.266	193.584	1.08991
	171.71	252.523	1.3584			1299.14	-131.578	1.63002			362.239	-11.4136	1.14946			1044.43	-249.948	0.361818			-9.5931	124.623	1.16301
	479.205	204.643	1.24754			602.939	-102.887	1.29487			693.8	-10.4773	1.2489			205.758	142.645	0.343202			727.654	138.718	1.05575
	897.146	-64.657	1.3014			987.311	-27.4192	1.2968			501.055	-31.5531	1.30045			570.651	35.5885	0.416544			-32.5905	251.494	1.14207
	135.79	-131.507	1.74864			836.284	-31.0391	1.35569			1035.84	40.0662	1.34573			318.235	-39.4792	0.370369			683.591	230.416	1.08846
	98.8953	314.536	1.18806			1192.92	80.4362	1.47281			325.352	-173.874	1.12527			886.876	-227.541	0.376199			366.34	64.2547	1.11717
	929.958	-109.895	1.29436			721.558	-20.6745	1.29546			286.475	97.8489	1.02384			368.038	88.1617	0.376806			602.302	275.497	1.02418
	239.45	272.228	1.34739			557.963	16.4758	1.29169			879.039	-301.864	1.18794			624.937	-125.018	0.399253			343.261	322.332	1.23173
	805.855	-108.825	1.29899			964.401	-62.7891	1.38564			582.97	12.8801	1.15749			948.89	276.606	0.462093			978.157	-8.42637	1.21574
	531.477	232.836	1.42118			797.791	62.9914	1.48928			180.66	85.859	1.45069			533.751	-111.9	0.423004			140.455	214.286	1.18611
	611.409	-129.581	1.28049			539.072	-140.795	1.48913			187.117	-65.0306	1.13929			647.931	-66.3035	0.450696			68.2141	101.046	1.14314
	754.251	77.5773	1.14589			433.433	-104.454	1.26532			899.752	-300.8	1.32697			1007.68	-28.7461	0.409529			-112.855	456.849	1.21792
	159.862	74.0554	1.44891			798.524	-0.531137	1.31942			823.537	184.619	1.30602			711.553	-109.682	0.441491			167.146	128.534	1.11192
	597.41	99.2036	1.16076			874.211	236.768	1.34945			858.401	-263.317	1.34755			470.137	-74.2627	0.438476			534.136	226.026	1.18919
	585.845	-57.184	1.15227			1259.86	-118.573	1.50271			312.872	-206.648	1.17389			530.431	34.3174	0.489019			753.43	135.038	1.05719
	328.557	120.056	1.3097			785.731	89.8321	1.3675			693.885	-155.552	1.26228			787.464	-103.486	0.395446			-68.112	100.657	1.17064
	514.484	-80.6335	1.25903			966.75	-46.9064	1.34925			1182.23	-283.934	1.66557			1001.87	320.912	0.734449			-80.0946	107.844	1.14359
	192.294	-242.186	1.54414			444.999	-97.4767	1.21476			317.467	265.896	1.04436			1215.37	-307.076	0.360158			494.749	268.731	1.23529
	388.356	-2.46505	1.4011			654.53	-46.2164	1.20146			1210.27	243.995	1.71908			1063.52	128.399	0.375969			655.142	11.9203	1.00692
	712.57	-107.643	1.27072			1217.87	-3.02788	1.44332			384.665	-71.798	1.15529			475.773	-261.844	0.334718			306.384	283.302	1.15795
	409.937	291.322	1.39528			1271.57	14.612	1.60448			826.727	-49.7687	1.51725			881.439	141.429	0.460389			900.582	17.0035	1.23092
	490.869	192.902	1.21431			528.309	-46.1955	1.29349			703.602	199.16	1.29194			531.232	-3.10812	0.37414			587.698	262.937	1.15646
	552.551	176.785	1.62587			713.269	192.217	1.26468			742.48	-240.443	1.33014			744.637	51.6772	0.380029			500.781	257.608	1.16793
	758.968	79.7711	1.34896			453.974	-27.5616	1.27373			719.35	-13.0019	1.18949			562.001	-110.189	0.38153			-17.039	217.458	1.1902
	895.248	-272.764	1.16426			586.682	-140.011	1.32868			465.45	-10.0398	1.29398			544.811	-95.4443	0.359609			929.031	0.313169	1.34612
	215.197	-116.087	1.83129			552.035	-43.0068	1.41664			980.38	326.565	1.82325			513.352	-29.5926	0.384993			466.701	308.733	1.2295
	854.338	-55.0408	1.23412			535.429	-60.8907	1.27305			298.165	-163.582	1.18388			29.3134	-43.9141	0.364611			436.323	249.989	1.22028
	533.752	240.401	1.20974			1096.82	-166.487	1.4814			470.048	-114.405	1.0199			778.869	-154.619	0.352249			308.554	191.132	1.08814
	771.485	-36.6528	1.40435			943.998	18.9357	1.41284			1079.31	-313.879	1.38432			795.961	133.706	0.392792			459.868	337.352	1.09189
	731.132	-150.354	1.80882			871.976	62.8899	1.27333			876.972	126.91	1.39066			712.272	-118.002	0.417685			154.489	145.944	1.16567
	415.313	120.54	1.44548			679.427	-80.5321	1.25403			951.957	-149.564	1.27777			929.401	-181.121	0.362764			-29.81	295.072	1.26429
	431.178	-176.281	1.42339			872.418	4.09289	1.16959			464.033	-5.96653	1.25916			765.133	156.427	0.359652			570.201	276.454	1.14333
	103.396	-135.904	1.69281			1141.23	-4.91473	1.38582			293.41	-105.691	1.13461			869.418	123.484	0.385058			-4.39489	176.211	1.16333
	370	-125.997	1.37482			701.619	-104.537	1.37695			834.818	-254.136	1.40839			1163.8	-129.793	0.37893			243.549	337.103	1.23626
	372.971	-92.65	1.79417			879.355	-69.9302	1.32303			1229.3	-330.281	1.57653			1180.62	-316.534	0.337526			578.523	139.809	1.06563
	447.641	262.251	1.45941			874.705	-103.642	1.40164			851.123	22.0047	1.5746			195.414	-42.8458	0.327273			-38.8726	135.423	1.1745
	687.738	-95.3469	1.28144			498.948	-163.269	1.34412			1175.35	-111.458	1.73513			834.616	-138.457	0.338245			577.02	-9.59042	1.03021
	418.068	-125.301	1.45939			394.005	-6.10969	1.23109			281.691	-138.612	1.2562			819.755	53.3303	0.372727			564.306	229.104	1.12807
	739.13	-144.833	1.21671			890.029	74.4366	1.36969			499.612	-217.255	1.17288			995.688	-359.621	0.303209			526.64	-7.30755	1.05441
	289.578	293.201	1.55891			745.163	-79.2134	1.2994			1077.83	-44.4466	1.40023			792.011	174.425	0.431447			481.801	329.799	1.07459
	645.945	77.9664	1.13832			1142.64	70.6495	1.53646			1016.63	-83.7596	1.4351			655.056	188.158	0.364275			591.441	99.5989	1.08238
	934.498	-302.133	1.30972			1253.47	-57.4477	1.59446			961.862	-284.739	1.41061			1064.53	-241.605	0.504454			889.246	-19.4478	1.29805
	164.379	333.774	1.30527			1187.11	-24.8472	1.4915			707.077	-198.716	1.43491			353.083	-28.2168	0.378869			207.062	171.422	1.13526
	551.108	215.3	1.23617			1163.45	-67.1538	1.33374			855.743	-263.42	1.2614			167.14	-211.745	0.290937			382.317	9.885	1.111
	296.205	278.01	1.30898			615.965	-37.292	1.36367			359.319	34.4197	1.25617			1081.53	3.47131	0.384945			384.992	248.286	1.20199
	516.563	-122.811	1.35782			945.53	-79.8042	1.36624			1192.44	-294.133	1.31066			666.701	193.447	0.375278			603.197	-203.444	1.27475
	121.478	-90.6581	1.95253			644.001	-197.397	1.52125			885.532	220.692	1.97683			779.591	162.26	0.381064			326.443	58.1122	1.11273
	873.382	-140.272	1.36779			550.968	-9.34082	1.3201			1092.88	-53.2353	1.41958			877.222	68.1084	0.379808			145.167	343.579	1.31006
	290.643	-244.304	1.51963			1264.49	-41.405	1.53209			584.899	-230.012	1.46576			286.968	156.494	0.320516			454.796	273.879	1.22145
	138.737	-399.22	1.51931			790.512	-32.1369	1.35229			555.602	-118.286	1.33051			987.272	-229.104	0.333922			-11.8943	380.676	1.18644
	1044.43	105.235	1.42321			1134.75	-77.4679	1.59073			806.744	-61.8588	1.43033			780.969	132.695	0.368033			73.6892	-19.9118	1.53208
	483.911	-137.263	1.47396			474.784	-101.333	1.33921			1181.5	-283.898	1.7609			1075.77	121.147	0.384646			255.813	-155.875	1.45473
	299.892	-233.676	1.9925			638.622	-121.977	1.35244			350.519	-62.4621	1.05088			1098.45	130.547	0.412836			221.675	246.521	1.21271
	127.479	172.297	1.47029			1053.54	-4.60559	1.51988			751.726	118.817	1.45261			1141.15	132.835	0.381191			-35.3192	237.814	1.12939
	303.186	64.026	1.19529			523.75	-75.5067	1.2848			1150.53	35.4987	1.13696			118.746	-42.4139	0.308506			185.374	402.822	1.26381
	731.949	-133.598	1.47149			1104.7	-105.613	1.338			1125.44	18.7806	1.52397			1186.17	64.9642	0.34467			601.201	229.654	1.06492
	457.79	180.714	1.5488			1073.94	-176.396	1.36095			440.675	-90.7319	1.17676			531.105	-143.602	0.325362			140.024	360.684	1.34927
	97.74	69.2184	1.45617			609.456	-163.75	1.46696			1205.05	-67.9734	1.18997			639.842	111.288	0.329474			440.861	-13.4301	1.0841
	451.27	190.35	1.45841			1249.61	-42.0489	1.47555			186.551	-70.9139	1.09405			184.348	-224.636	0.360156			177.059	330.45	1.29206
	535.288	-187.309	1.72876			860.272	-50.6312	1.54029			1023.21	-340.234	1.22229			940.948	257.651	0.413374			236.451	100.765	1.13876
	353.18	-217.857	1.61251			1218.81	-149.947	1.49176			655.621	-13.1528	1.50541			340.744	176.536	0.301372			168.184	430.296	1.20669
	524.53	-14.5208	1.14062			1092.72	-112.728	1.35434			1157.75	6.79884	1.44292			594.998	157.799	0.322365			919.275	-21.2789	1.23578
	196.086	85.0082	1.41249			884.09	215.077	1.52121			847.612	-195.742	1.5605			1098.86	181.303	0.351617			249.789	304.692	1.24016
	765.696	117.745	1.22387			938.578	-65.4205	1.50592			156.933	-161.519	1.48721			329.961	225.518	0.296067			927.221	-26.1613	1.20075
	600.053	-148.609	1.38198			775.39	-96.8957	1.26663			520.201	70.5561	1.3384			608.065	136.049	0.324577			535.793	167.53	1.0622
	113.011	295.924	1.36826			1195.39	-16.0838	1.3798			315.087	-132.235	1.00229			1204.62	-83.1191	0.33403			298.46	357.931	1.30999
	97.0724	-258.909	1.77246			832.963	146.256	1.36689			690.306	-80.4596	1.30793			570.704	-78.799	0.327793			183.896	114.089	1.14059
	268.784	287.633	1.41317			984.409	-2.58201	1.33177			1095.43	-268.387	1.21136			1017.8	-213.188	0.501559			370.194	173.007	1.14542
	349.976	168.362	1.38311			1089.72	-73.2698	1.43394			950.118	-27.2207	1.40593			1119.28	189.62	0.39736			503.233	306.822	1.07853
	419.698	274.417	1.28325			916.874	-24.0753	1.32012			231.636	-250.545	1.2051			-85.2924	-318.408	0.209123			156.199	287.318	1.19899
	747.619	-68.554	1.16144			1239.51	28.296	1.51048			1110.33	-47.5509	1.39234			710.68	126.633	0.380292			284.764	397.65	1.09918
	911.659	-191.295	1.32199			1014.7	-67.4523	1.39611			1090.35	152.134	1.29068			83.4737	85.7045	0.349115			-75.9368	277.62	1.171
	849.404	-115.306	1.37833			265.308	132.657	1.25064			676.399	-4.33047	1.36555			86.3769	118.304	0.272263			63.9792	137.772	1.16001
	625.207	-37.2047	1.30806			1106.89	137.166	1.72555			256.825	-94.7072	1.13844			1135.3	-107.117	0.338325			121.11	161.69	1.10162
	581.883	-66.1471	1.39521			636.026	-75.8142	1.34746			1242.86	-128.753	1.45468			97.6874	-128.712	0.260547			522.72	213.623	1.05587
	414.211	-169.484	1.67389			1115.19	-14.8867	1.3341			1167.94	-315.007	1.47025			820.2	156.936	0.284318			-3.21595	336.796	1.18287
	446.347	-117.602	1.3771			986.356	-135.511	1.34598			863.72	242.3	1.50864			387.336	119.527	0.307051			660.288	-221.939	1.29714
	364.29	113.062	1.43321			873.605	175.49	1.45303			785.306	-279.208	1.4551			904.999	406.092	0.345445			560.416	273.113	1.19088
	618.427	119.008	1.52892			839.556	169.498	1.68281			390.864	-79.3831	1.08337			755.061	-106.418	0.300043			-51.6243	396.022	1.22184
	609.767	75.3795	1.18182			1181.83	10.6274	1.56264			938.266	-59.3857	1.35181			1085.49	-128.206	0.32435			-97.8491	356.9	1.21283
	122.195	-397.515	1.73279			802.217	-73.3161	1.40137			718.105	-334.252	1.15285			825.721	94.1056	0.334416			472.535	321.5	1.07611
[truncated: 7,248 more rows]

## Sheet: cumulative distribution
Ch1 : Ch2		% in bin										cumulative % of total
lower boundary	upper boundary	0 hpa	4 hpa	8 hpa	12 hpa	28 hpa				lower boundary	upper boundary	0 hpa	4 hpa	8 hpa	12 hpa	28 hpa
	0	0	0	0	0	0					0	0	0	0	0	0
0	0.2	0	0	0.0122055	0	0				0	0.2	0	0	0.0122055	0	0
0.2	0.4	0	0.0233809	0.68351	30.9609	0.0685989				0.2	0.4	0	0.0233809	0.695716	30.9609	0.0685989
0.4	0.6	0.047727	0	0.878799	56.2278	0.120048				0.4	0.6	0.047727	0.0233809	1.57451	87.1886	0.188647
0.6	0.8	0.465338	0.841711	2.45331	8.54093	3.32705				0.6	0.8	0.513065	0.865092	4.02783	95.7295	3.51569
0.8	1	7.93461	11.7606	28.8661	2.4911	63.0424				0.8	1	8.44768	12.6257	32.8939	98.2206	66.5581
1	1.2	39.3032	49.4038	44.2695	1.42349	25.3987				1	1.2	47.7509	62.0295	77.1634	99.6441	91.9568
1.2	1.4	36.6066	31.5408	17.9666	0.355872	6.2425				1.2	1.4	84.3575	93.5703	95.13	100	98.1993
1.4	1.6	11.3948	5.8686	3.75931	0	1.26908				1.4	1.6	95.7523	99.4389	98.8893	100	99.4684
1.6	1.8	2.94714	0.490998	0.854388	0	0.411593				1.6	1.8	98.6994	99.9299	99.7437	100	99.88
1.8	2	0.894881	0.0467617	0.207494	0	0.0342994				1.8	2	99.5943	99.9766	99.9512	100	99.9143
2	2.2	0.262499	0.0233809	0.0244111	0	0.0514492				2	2.2	99.8568	100	99.9756	100	99.9657
2.2	2.4	0.0715905	0	0.0244111	0	0.0342994				2.2	2.4	99.9284	100	100	100	100
2.4	2.6	0.0119318	0	0	0	0				2.4	2.6	99.9403	100	100	100	100
2.6	2.8	0.0119318	0	0	0	0				2.6	2.8	99.9523	100	100	100	100
2.8	3	0.0238635	0	0	0	0				2.8	3	99.9761	100	100	100	100
3	3.2	0	0	0	0	0				3	3.2	99.9761	100	100	100	100
3.2	3.4	0	0	0	0	0				3.2	3.4	99.9761	100	100	100	100
3.4	3.6	0	0	0	0	0				3.4	3.6	99.9761	100	100	100	100
3.6	3.8	0	0	0	0	0				3.6	3.8	99.9761	100	100	100	100
3.8	4	0.0119318	0	0	0	0				3.8	4	99.9881	100	100	100	100
4	4.2	0	0	0	0	0				4	4.2	99.9881	100	100	100	100
4.2	4.4	0	0	0	0	0				4.2	4.4	99.9881	100	100	100	100
4.4	4.6	0	0	0	0	0				4.4	4.6	99.9881	100	100	100	100
4.6	4.8	0	0	0	0	0				4.6	4.8	99.9881	100	100	100	100
4.8	5	0	0	0	0	0				4.8	5	99.9881	100	100	100	100
5	5.2	0	0	0	0	0				5	5.2	99.9881	100	100	100	100
5.2	5.4	0	0	0	0	0				5.2	5.4	99.9881	100	100	100	100
5.4	5.6	0	0	0	0	0				5.4	5.6	99.9881	100	100	100	100
5.6	5.8	0	0	0	0	0				5.6	5.8	99.9881	100	100	100	100
5.8	6	0	0	0	0	0				5.8	6	99.9881	100	100	100	100
6	6.2	0	0	0	0	0				6	6.2	99.9881	100	100	100	100
6.2	6.4	0	0	0	0	0				6.2	6.4	99.9881	100	100	100	100
6.4	6.6	0	0	0	0	0				6.4	6.6	99.9881	100	100	100	100
6.6	6.8	0	0	0	0	0				6.6	6.8	99.9881	100	100	100	100
6.8	7	0	0	0	0	0				6.8	7	99.9881	100	100	100	100
7	7.2	0	0	0	0	0				7	7.2	99.9881	100	100	100	100
7.2	7.4	0	0	0	0	0				7.2	7.4	99.9881	100	100	100	100
7.4	7.6	0	0	0	0	0				7.4	7.6	99.9881	100	100	100	100
7.6	7.8	0	0	0	0	0				7.6	7.8	99.9881	100	100	100	100
7.8	8	0	0	0	0	0				7.8	8	99.9881	100	100	100	100
8	8.2	0	0	0	0	0				8	8.2	99.9881	100	100	100	100
8.2	8.4	0	0	0	0	0				8.2	8.4	99.9881	100	100	100	100
8.4	8.6	0	0	0	0	0				8.4	8.6	99.9881	100	100	100	100
8.6	8.8	0	0	0	0	0				8.6	8.8	99.9881	100	100	100	100
8.8	9	0	0	0	0	0				8.8	9	99.9881	100	100	100	100
9	9.2	0	0	0	0	0				9	9.2	99.9881	100	100	100	100
9.2	9.4	0	0	0	0	0				9.2	9.4	99.9881	100	100	100	100
9.4	9.6	0	0	0	0	0				9.4	9.6	99.9881	100	100	100	100
9.6	9.8	0	0	0	0	0				9.6	9.8	99.9881	100	100	100	100
9.8	10	0	0	0	0	0				9.8	10	99.9881	100	100	100	100
10	10.2	0	0	0	0	0				10	10.2	99.9881	100	100	100	100
10.2	10.4	0	0	0	0	0				10.2	10.4	99.9881	100	100	100	100
10.4	10.6	0.0119318	0	0	0	0				10.4	10.6	100	100	100	100	100
10.6	10.8	0	0	0	0	0				10.6	10.8	100	100	100	100	100
10.8	11	0	0	0	0	0				10.8	11	100	100	100	100	100
11	11.2	0	0	0	0	0				11	11.2	100	100	100	100	100
11.2	11.4	0	0	0	0	0				11.2	11.4	100	100	100	100	100
11.4	11.6	0	0	0	0	0				11.4	11.6	100	100	100	100	100
11.6	11.8	0	0	0	0	0				11.6	11.8	100	100	100	100	100
11.8	12	0	0	0	0	0				11.8	12	100	100	100	100	100
