# Supplementary material for: Non-canonical Hedgehog signaling regulates spinal cord and muscle regeneration in Xenopus laevis larvae
Source: eLife. 2021 May 6;10:e61804. doi: 10.7554/eLife.61804 (PMC8137141; doi:10.7554/eLife.61804)
Supplement: Figure 3—figure supplement 1—source data 1. [file elife-61804-fig3-figsupp1-data1.xlsx]

## Sheet: Sheet1
	EGFP vs iRFP670 distribution by treatment
	10 µM GANT61						10 µM GANT61						10 µM GANT61
	0 hpa	signal intensity	signal intensity				6 hpa	signal intensity	signal intensity				18 hpa	signal intensity	signal intensity
Sample ID	cell ID	X (iRFP670)	Y (EGFP)			Sample ID	cell ID	X (iRFP670)	Y (EGFP)			Sample ID	cell ID	X (iRFP670)	Y (EGFP)
1	2963	1164.67	975.222	1		1	14760	1144.67	756.333			1	23882	1014.5	887.5
1	2965	1018.44	1014.06	1		1	14761	1306.5	801.813			1	23886	1011.38	736.313
1	2967	1388.58	1121.89	1		1	14769	1174	741.125			1	23890	1016.87	830.667
1	2969	1044.5	1104.39	1		1	14770	1111.17	762.778			1	23892	2609.88	838.813
1	2973	1229.11	885.211	1		1	14772	1117.72	740.056			1	23893	2532.53	891.176
1	2976	1246.83	751.222	1		1	14774	1165.11	656.368			1	23894	2393.72	837.333
1	2978	1072.12	915.353	1		1	14779	1149.11	888.833			1	23895	2560.12	867.471
1	2982	1161.71	1053.52	1		1	14782	1048.33	683.267			1	23896	2596.5	781.167
1	2983	1129.94	790.118	1		1	14783	1234.35	717.882			1	23897	2201.17	868.5
1	2984	1086.71	898.176	1		1	14793	1028.8	831.2			1	23899	1275.25	803.813
1	2985	1034.5	816.063	1		1	14795	1363.8	882.933			1	23909	1048.25	932.125
1	2986	1258.76	837.235	1		1	14796	1149.53	1055.24			1	23916	1049.95	716.65
1	2987	1253.11	877	1		1	14798	1302.65	809.824			1	23917	1051.31	692.875
1	2993	1353	621.789	1		1	14799	1380.78	871.889			1	23919	1412.26	670.263
1	3000	1038.13	677.188	1		1	14801	1080.88	861.375			1	23921	1600.95	678.684
1	3001	1059.4	807.867	1		1	14802	1027.19	1187.06			1	23922	1273.82	639.955
1	3003	1052.95	753	1		1	14805	1046.11	793.333			1	23923	1117.33	638.067
1	3004	1105.31	900.938	1		1	14806	2668.76	766.381			1	23930	3084.11	998.444
1	3005	1260.17	943.444	1		1	14807	2930.71	886.941			1	23938	1001.41	809.471
1	3006	1001.35	873.35	1		1	14809	1384.81	708.313			1	23941	1068.11	816.316
1	3009	2955.2	1055.1	1		1	14810	1053.93	683.333			1	23951	1140.44	808.438
1	3010	3801.53	1158.26	1		1	14814	1015.94	854.313			1	23952	4347.83	1169.78
1	3011	3093.41	1182.71	1		1	14815	3078.63	851.158			1	23970	1933.11	739.5
1	3012	1015.88	958.294	1		1	14816	1450.88	707.438			1	23973	2001.47	917
1	3013	1196	858.722	1		1	14817	1029.71	729.571			1	23974	1067.93	617.2
1	3014	1072.75	852.5	1		1	14819	1142.81	848.813			1	23979	1274.58	951.895
1	3015	1239.13	1006.67	1		1	14821	1164.44	992.5			1	23980	3025.82	1263.88
1	3016	1405.5	906.813	1		1	14822	1824	868.375			1	23985	4212.72	1138.33
1	3017	1004.11	1041.5	1		1	14823	2414.06	862.688			1	23987	1018.5	878.556
1	3018	1229.75	867.05	1		1	14824	1055.07	841.533			1	23989	1045.5	941.625
1	3019	1523.8	1011.6	1		1	14829	1439.63	805.368			1	23990	2601.12	863.706
1	3020	1348.28	958.778	1		1	14830	1034.35	799.176			1	23994	1121.47	973.706
1	3022	1437.94	959.188	1		1	14831	1390.19	756.813			1	23995	1108.22	830.833
1	3023	1424.44	978.313	1		1	14832	1207.33	880.933			1	23997	1969.06	1489.17
1	3024	1104.53	1097.06	1		1	14833	1436	1112.07			1	23998	1123.71	1006.24
1	3026	1099.17	1203.94	1		1	14834	2052.22	763.333			1	23999	3008.63	914.5
1	3027	1434.85	1125.1	1		1	14837	1300.88	1105.19			1	24000	6520	1104.82
1	3028	1172.81	1152.81	1		1	14840	1042.94	778			1	24001	2616.2	839.05
1	3029	1225.61	1054.44	1		1	14844	1077.36	953.357			1	24002	3349.14	879.333
1	3030	1245.79	1106.63	1		1	14845	1175.06	878.375			1	24004	2571.87	867.696
1	3031	1001.56	1208.06	1		1	14846	1055.57	590.714			1	24005	3069.56	908.688
1	3032	1099.5	1103	1		1	14848	1033.78	760.167			1	24008	1651.31	1013.88
1	3033	1689.19	902.75	1		1	14854	1166.5	746.688			1	24010	3454.61	938.278
1	3034	1530.38	1030	1		1	14855	1030.71	924.882			1	24011	3461.24	934.588
1	3035	1060.13	1172.25	1		1	14857	1217.17	683.944			1	24013	1426.44	1135.25
1	3036	1132.88	1218.31	1		1	14858	1243.56	672.75			1	24014	1159.63	855.684
1	3037	1052.26	1015.68	1		1	14860	1070.67	705.111			1	24018	1158.56	900
1	3038	1276.27	1231.87	1		1	14861	1062.27	908.533			1	24024	6409.72	848.111
1	3039	1165.06	1117.94	1		1	14863	1165.07	738.6			1	24025	2032.58	691.842
1	3040	1018.33	1383.06	1		1	14865	1095.06	733.667			2	24031	1209.33	1365.2
1	3041	1082.11	1261.89	1		1	14866	1173.94	717.75			2	24034	1096.94	1244.31
1	3042	1031.63	1129.13	1		1	14869	4501.94	1003.06			2	24038	2112.5	1452.75
1	3043	1463.75	1281.31	1		1	14870	3807.8	936.667			2	24039	1288.75	1492.88
1	3044	1294.71	1146.29	1		1	14871	1150.53	1112.41			2	24040	1070.89	1293.28
1	3045	1240.56	1072.22	1		1	14873	1465.27	1279.93			2	24042	1276.18	1488.24
1	3046	4255.95	1111.2	1		1	14874	1160.11	1086.56			2	24045	1283.07	1170.5
1	3047	3527.65	1067.12	1		1	14875	1119.28	973.056			2	24049	1052.25	1533.38
1	3048	3737	1185.76	1		1	14879	4181.31	992.25			2	24052	2065.81	881.063
1	3049	1067.6	1282.47	1		1	14880	2909.84	1039.47			2	24053	1060	1279.24
1	3052	1885.6	1763	1		1	14881	3235.57	1012.86			2	24054	1196.25	838.875
1	3053	1647.65	1495.35	1		1	14882	1461.29	870.941			2	24058	1037.24	733.529
1	3054	1125.05	909.632	1		1	14888	2515.56	950.375			2	24059	1058.65	758.824
1	3056	1082.5	1169.88	1		1	14891	1072.69	956.063			2	24064	1107.74	1459.47
1	3057	1128.28	1261.83	1		1	14894	1107.56	1107.63			2	24071	2743.17	1425.61
1	3058	1088.89	1103.16	1		1	14896	1136.25	981.938			2	24072	1020.56	1005.38
1	3059	1049.65	1448.95	1		1	14897	2403.7	1017.55			2	24073	1150.71	1095.47
1	3060	1413.95	1562.25	1		1	14898	1648.8	1200.87			2	24079	1318.06	1957.24
1	3061	1176.44	1152.44	1		1	14900	1130.5	960.111			2	24090	42063.2	3701.31
1	3062	1081.78	1150.56	1		1	14902	1095.75	974			2	24092	1553.44	829.438
1	3063	1170.82	805.647	1		1	14904	1080.53	827.421			2	24093	1255.53	819.059
1	3066	1249.38	894	1		1	14906	1586.94	834.611			2	24095	1169.19	50822.3
1	3068	1015.25	970.75	1		1	14908	1184.43	812.214			2	24096	1899.88	1574.25
1	3069	1474.21	956.714	1		1	14910	1598.72	789.556			2	24101	3394.56	934.625
1	3072	1093.68	909.947	1		1	14911	1548.33	818.222			2	24102	1243.41	2045.24
1	3075	3121.81	883.313	1		1	14912	1018.06	743.889			2	24105	1474.88	726.875
1	3077	1790.6	871	1		1	14914	1148.31	942.313			2	24109	1494.8	764.8
1	3080	1352.69	1018.69	1		1	14915	1190.75	833.375			2	24110	1472.06	674.944
1	3084	3676.93	1027.33	1		1	14916	1161.18	803.824			2	24111	1198.36	729.214
1	3085	3876.7	999.4	1		1	14917	1450.75	693.75			2	24112	1120.13	778.667
1	3087	3539.47	992.412	1		1	14920	1378.4	907.533			2	24113	1043.06	704.875
1	3088	1724	964	1		1	14923	1744.87	886.867			2	24114	1075.21	755.429
1	3090	1144.06	948.444	1		1	14924	2419.44	1069.19			2	24115	2900	1054.42
1	3095	1628.29	1112	1		1	14931	1600.76	899.176			2	24116	1851.29	1266.18
1	3096	1057.44	1219.78	1		1	14932	6355.17	1000.89			2	24117	1574.63	907.188
1	3097	1017.06	1064.82	1		1	14939	1027.07	797.267			2	24124	16028.2	2986.84
1	3098	1358.13	1080.73	1		1	14940	1078.21	877.857			2	24125	1282.11	894.5
1	3099	1279.95	1059.89	1		1	14943	1079.56	853.056			3	24127	1109.31	612.063
1	3101	1553.67	968.8	1		1	14944	1513.87	744.8			3	24133	1020.88	806.353
1	3103	1393.89	1093.61	1		1	14945	1013	770.286			3	24136	1527.47	597.067
1	3104	1285.13	1087.25	1		1	14947	1368	770.875			3	24139	1466.95	652.05
1	3105	1314.37	1218.74	1		1	14951	1509.2	778.2			3	24141	1261.12	653.353
1	3106	2109	914.875	1		1	14952	3495.22	859.944			3	24145	9738.24	881.647
1	3107	1070	955.625	1		1	14955	1190.56	759.313			3	24147	2041.75	672.75
1	3111	1148.31	1277.75	1		1	14956	1177.88	740.294			3	24148	1823	670.824
1	3113	1278.13	1012.5	1		1	14960	1264.61	757.556			3	24149	1484.65	636.941
1	3114	1105.56	959.167	1		1	14961	1608.71	648.143			3	24152	1803.63	650.875
1	3115	1056.69	1036.19	1		1	14962	1098.88	590.25			3	24153	1721.33	666.111
1	3116	1123.56	978.125	1		1	14963	1105.6	588.267			3	24154	1863.2	681.867
1	3117	1109.4	977.15	1		1	14965	2238.76	780.941			3	24155	2122.71	692.118
1	3118	1043.05	960.211	1		1	14968	1101.43	1017.79			3	24156	2216	707.688
1	3119	1199.62	1083.86	1		1	14969	1351.81	1044.88			3	24157	1115	770.588
1	3121	1725.31	898.5	1		1	14973	6219.12	952.412			3	24171	1210.76	815.81
1	3123	1232.59	1020.35	1		1	14974	13137.6	1217.56			3	24172	1795.47	1053.05
1	3125	1173.25	955.563	1		1	14975	5350.8	973.733			3	24175	1386.3	961.25
1	3126	1495.11	1025.11	1		1	14976	1442.22	1030.17			3	24183	1057.81	737.5
1	3128	1043.87	925.267	1		1	14977	1116.44	998.688			3	24196	1707.69	892.125
1	3129	1011.75	773.563	1		1	14978	3729.2	982.933			3	24208	3874.88	537.412
1	3130	1644.88	986.882	1		1	14979	4139.29	916.647			3	24209	1085.38	626.875
1	3131	1587.33	983.533	1		1	14980	4420.44	963.125			3	24210	6371.75	950.563
1	3133	1376.06	724.529	1		1	14981	1247.19	893.25			3	24219	1093.59	819.294
1	3137	1004.9	902.429	1		1	14982	1304.29	1115.41			3	24220	1045.24	808.824
1	3140	1184.39	873.222	1		1	14983	1410.94	1057			3	24223	15957.6	1232.5
1	3143	1158.85	881.6	1		1	14984	1259.2	1118.93			3	24227	2492.53	914.733
1	3145	1731.95	799.895	1		1	14987	1086.63	855.438			3	24243	1062.69	922.5
1	3149	1365	809	1		1	14988	1260.76	846.059			3	24245	1109.94	1242.12
1	3150	1084.5	896.563	1		1	14989	1249.18	917.176			3	24248	1264.12	1263.24
1	3152	1288.75	808.5	1		1	14990	1011.17	1035.94			3	24253	1211.56	887
1	3153	1217.17	930.083	1		1	14991	1420.94	1019.81			3	24254	1091.94	905.444
1	3156	1837.25	780.75	1		1	14995	1119.93	914.267			3	24255	1036.42	1153.21
1	3157	1093.28	740.167	1		1	14997	1227.82	876.529			3	24256	1030.89	1024.56
1	3158	1096.65	762.706	1		1	15001	1019.19	789.625			3	24257	1204.5	899.813
1	3162	1075.35	958.471	1		1	15005	1008.11	803.842			3	24258	1027.56	914.833
1	3164	1162.5	938.389	1		1	15006	1241.13	856.375			3	24260	1095.17	989.556
1	3165	1160.26	922.474	1		1	15009	1044.69	837.938			4	24277	2176	989.176
1	3168	1045.75	1055.63	1		1	15012	1083.75	867.438			4	24284	1095.24	667.059
1	3169	1098.94	1136.38	1		1	15013	1433.47	881.706			4	24285	1044.4	720.2
1	3171	1075.94	1142.69	1		1	15014	1004.76	941.647			4	24287	5885.32	1485.32
1	3172	1045.47	937.412	1		1	15017	3425.88	898.375			4	24289	1195.61	753.111
1	3174	1057.8	940.6	1		1	15019	1027.8	766.467			4	24290	1027.25	741.375
1	3175	1598.65	1023.18	1		1	15021	1039.07	725.267			4	24291	1142.31	804.063
1	3177	1015.31	1062.88	1		1	15029	1091.41	704.647			4	24292	1210.88	812.563
1	3183	1014.6	1127.33	1		1	15036	1334	986.833			4	24293	9097.69	1396.81
1	3184	1462.35	931.765	1		1	15037	1020.75	821.563			4	24299	1362.76	885.882
1	3185	1016.16	852.368	1		1	15038	6344	1140.2			4	24300	1252.93	886.857
1	3188	1079.32	1215.16	1		1	15039	3835.29	1161.24			4	24307	1745.69	1070.38
1	3196	1723.94	1158.33	1		1	15040	1227.19	861.063			4	24309	1038.94	1035.56
1	3200	1015.72	908.167	1		1	15041	1180	942.25			4	24313	1008.28	816.778
1	3201	6728	1198.26	1		1	15043	1216.19	1028.25			4	24321	1113.93	828.8
1	3202	1086.67	910.4	1		1	15044	1042.94	880			4	24327	1117.64	887.929
1	3203	1017	964.6	1		1	15045	1151.8	886.667			4	24328	1149.56	889.313
1	3204	1161.63	930.688	1		1	15048	1205.44	851.313			4	24329	1036.75	842.875
1	3205	1099.45	954.1	1		1	15049	1165.56	874.188			4	24330	1037	940.706
1	3207	1106.4	989.35	1		1	15052	1481.47	838.941			4	24333	1000.17	871.667
1	3210	1011.63	778.625	1		1	15053	1601.76	873.235			4	24334	1519.39	56201.6
1	3211	1196	792.684	1		1	15059	2142.29	889.882			4	24339	2026.44	4472.78
1	3214	1502.75	917.625	1		1	15066	1358.35	1035.25			5	24349	1193.19	724.75
1	3216	1538.38	897.063	1		1	15069	1173.75	825.625			5	24353	1485.67	707.5
1	3217	2967.63	870.947	1		1	15070	1376.56	801.375			5	24364	1001.41	718.588
1	3218	3787.06	1058.71	1		1	15071	1061	2253.56			5	24369	1562.39	896.889
1	3221	1384	823.938	1		2	15072	6170.41	574.176			5	24384	1210	901.6
1	3228	4700.73	1024.07	1		2	15074	1216	788.211			5	24385	1771	874.278
1	3229	1263.56	780.667	1		2	15075	1011	720.611			5	24398	1070.67	892.762
1	3230	1118.53	745	1		2	15076	1373.18	760.353			5	24399	1251.38	933.625
1	3231	1282.19	774.125	1		2	15077	1425.88	714.765			5	24400	1009.32	1068.58
1	3233	1292.6	731.267	1		2	15078	1840.13	875.375			5	24401	1030.25	830.7
1	3237	1077.6	751.2	1		2	15079	1495.25	788.625			6	24407	23322	1365.38
1	3238	1132.63	750.684	1		2	15080	1901.35	855.471			6	24408	37915.6	1541.04
1	3240	2408.61	690.667	1		2	15081	1736.25	806.188			6	24412	23839.1	1385.1
1	3241	1080	690.85	1		2	15082	1933.11	819.053			6	24413	24342.8	1222.04
1	3242	1968.57	771.286	1		2	15083	1786.63	815.684			6	24414	1070.56	794.04
1	3244	1058.5	746.438	1		2	15084	1307.29	777.643			6	24415	1116.92	761.264
1	3245	2337.59	709.882	1		2	15085	1812.56	830.813			6	24416	1104.85	1017.94
1	3246	1080.64	809.429	1		2	15086	2145.59	864.765			6	24417	25897.3	1314.2
1	3247	2341.24	666.235	1		2	15087	1419.82	736.176			6	24418	22661.8	1204
1	3249	1005.39	834.889	1		2	15088	2485.88	845.588			6	24419	1127.08	761.102
1	3250	2931.19	712.438	1		2	15089	2147.53	845.118			6	24421	1189.41	842.739
1	3259	1106.73	781.8	1		2	15090	1608.5	824.278			6	24424	26281.4	1212.1
1	3261	1230	611.364	1		2	15091	2705.59	902.412			6	24425	26436.3	1265.33
1	3263	1400.1	1297.25	1		2	15092	2970.33	1005.61			6	24426	25594.8	1215
1	3265	1378.75	1199.56	1		2	15093	3780	1075.79			6	24427	6990.09	885.239
1	3267	1027.75	1340.94	1		2	15094	1648.63	931.625			6	24428	6835.96	827.367
1	3268	1014.56	1336.44	1		2	15098	1055.19	909.286			6	24429	7145.57	896.936
1	3269	1077.87	1235.6	1		2	15100	1014.31	929.313			6	24431	1003.74	769.391
1	3271	1961.83	1351.17	1		2	15102	1048.07	901.067			6	24433	1309.33	751.673
1	3272	1329.71	1329.41	1		2	15103	1167.72	920.056			6	24438	1329.6	1096.94
1	3274	1123.63	1068.38	1		2	15104	1729.63	1148.19			6	24440	7578.26	857.978
1	3275	1088.44	1017.31	1		2	15105	1300.39	988.167			6	24442	6956.8	834.24
1	3276	1170.5	1014.69	1		2	15106	1851.47	1294.47			6	24443	7248.15	818.792
1	3277	6946.72	1451.56	1		2	15107	3703.71	1196.06			6	24444	1173.67	713.776
1	3278	1447.47	1263.05	1		2	15108	1022.72	984.222			6	24446	7423.71	853.082
1	3279	1151.19	1236.94	1		2	15109	2330.68	1188.63			6	24447	1006.92	722.941
1	3280	1046.06	1082.94	1		2	15110	1250.17	1192.5			6	24448	1306.08	864.354
1	3282	4711.25	1341.38	1		2	15111	2013.95	1375.53			6	24449	1085.27	760
1	3283	1271.25	978.35	1		2	15113	1458.9	1109.8			6	24450	1040.58	748.833
1	3284	1152.83	1028.44	1		2	15114	1039.29	1275.18			6	24451	1276.68	732.06
1	3286	1260.94	986.706	1		2	15117	1835.82	1382.94			6	24454	1096.27	734.078
1	3287	1097.31	980.625	1		2	15119	6384.5	1522.86			6	24455	2404.96	1014.71
1	3288	1515.29	991.176	1		2	15120	1455.5	1116.5			6	24456	23223.2	1118.22
1	3291	1048.88	1002.5	1		2	15121	3305.12	1259.35			6	24458	7379.6	849.22
1	3292	1364.33	1061.8	1		2	15122	2187.87	933.533			6	24459	7583.04	908.28
1	3294	1010.32	1393.11	1		2	15123	2691.13	972.688			6	24460	8770	893.854
1	3295	1491.71	1452.33	1		2	15124	1164.44	882.25			6	24461	7312.26	887.064
1	3296	1073.93	1092.93	1		2	15125	1068.47	866.867			6	24462	8277.24	1005.72
1	3297	1007.4	985.9	1		2	15126	1243	898.063			6	24463	1745.31	869.25
1	3298	1116.73	1090.2	1		2	15128	1414.18	1069.06			6	24464	8519.02	885.617
1	3301	1243.5	1258	1		2	15130	1043.78	1000.94			6	24465	8202.98	909.143
1	3302	1176.76	1097.18	1		2	15132	1020.31	848.563			6	24466	7845.1	881.188
1	3303	1061.31	1095.13	1		2	15133	1418.11	1108.17			6	24467	7574.31	843.412
1	3304	1028.72	982.889	1		2	15136	1129.25	1347.25			6	24468	1275.63	720.082
1	3305	1568.6	1052.3	1		2	15138	1479.93	816.6			6	24469	1586.52	712.25
1	3307	1153.6	1215	1		2	15142	1031.05	879.571			6	24470	5326.55	760.49
1	3309	2726.62	1175.71	1		2	15143	1077.38	1407.25			6	24471	1424.79	785.151
1	3310	10462.2	1288.69	1		2	15152	1068.19	1527.38			6	24472	1161.69	758.25
1	3311	1197.69	999.813	1		2	15154	1039.5	1020.75			6	24473	2156.83	739.065
1	3312	5378.06	1097.35	1		2	15156	3307.65	1153.45			6	24474	1217.68	706.02
1	3313	4237.71	1109.05	1		2	15161	50162.3	3682.72			6	24475	1316.52	743.9
1	3314	5724.28	1168.22	1		2	15163	1034.88	864.294			6	24476	2150.39	682.041
1	3315	6099.88	1149.44	1		2	15167	1174.13	788.867			6	24479	1042	696.102
1	3319	4826.06	1244.94	1		2	15169	1147.71	936.235			6	24481	1116.78	712.1
1	3322	1054.94	991.111	1		2	15170	1231.19	780.125			6	24484	42832.1	5271.79
1	3323	1121.05	1022.16	1		2	15172	1168.1	787.857			6	24485	1104.08	690.02
1	3325	1426.06	1088.17	1		2	15173	1166.73	771.545			6	24486	1109	693.04
1	3326	1940.43	936.643	1		2	15176	1405.05	1171.4			6	24487	1043.04	707.469
1	3327	1599.82	934.118	1		2	15178	1309.19	806.063			6	24491	1147.76	711.6
1	3328	1718.33	974.524	1		2	15179	1398.5	829.611			6	24493	1079.56	668.911
1	3329	1393.06	955.5	1		2	15180	1099.35	797.118			6	24494	1321.3	674.83
1	3330	1051.28	1105.67	1		2	15181	1345.28	800.056			6	24495	1344.77	698.5
1	3331	1052.75	896.625	1		2	15182	1402	820.688			6	24496	1383.43	692.63
1	3332	1631.78	1084.94	1		2	15186	1395.72	967.611			6	24497	1111.38	700.36
1	3336	1124.53	887.467	1		2	15188	1356.71	838			6	24498	1088.16	767.265
1	3338	1157.25	756.2	1		2	15191	1436.79	780.357			6	24499	1073.9	732.865
1	3339	1008.39	667.778	1		2	15196	1020.17	745.556			6	24500	1201.61	753.391
1	3345	1472.5	997.25	1		2	15197	1066.6	999.4			6	24503	1009.65	636.469
1	3346	1068.44	976.875	1		2	15199	1189.94	1212.88			6	24505	1073.51	651.776
1	3347	1069.21	860.947	1		2	15203	2191.59	894.353			6	24506	1037.8	668.239
1	3348	1997.21	965.053	1		2	15206	1166.94	963.824			6	24507	1020.11	670.906
2	3349	1655.69	899.188	2		2	15208	1004.56	705.5			6	24508	1059.98	652.239
2	3350	1941.44	909.438	2		2	15211	1070.79	722.571			6	24509	1018.47	658.83
2	3351	2326.13	994.333	2		2	15213	1370.5	1184.5			6	24512	1076.38	690.83
2	3352	1831.44	973.125	2		2	15214	7973.38	631.375			6	24516	1781.78	580.694
2	3353	2435.94	1015.25	2		2	15215	2169	1152.81			6	24517	3060.04	662.204
2	3354	2179.61	1039.94	2		2	15216	2326.45	1022.6			6	24518	3914.96	704.542
2	3355	2013.69	868.75	2		2	15217	2482	850.556			6	24519	1595.33	651.692
2	3356	2665.69	1079.94	2		2	15219	1176	713.875			6	24520	1463.27	641.938
2	3357	2754	1031.4	2		2	15220	3743.31	919.25			6	24521	1074.22	663.283
2	3360	1187.06	931.353	2		2	15222	2863.59	1147.94			6	24522	2045.14	724.449
2	3362	1111.63	874.938	2		2	15223	1744	1058.17			6	24523	15470.9	1016.98
2	3364	1042.44	808.875	2		2	15224	1846.69	1178.5			6	24524	16278.7	1064.09
2	3365	1251.89	921.778	2		2	15225	1148	973.714			6	24525	4428.08	662.25
2	3367	3242.25	1168	2		2	15226	1263.05	993.15			6	24526	3503.61	631.429
2	3368	2257.35	1075.59	2		2	15227	1180.44	955.938			6	24527	4525.08	732.06
2	3371	1070.13	1165.27	2		2	15229	1030.56	942			6	24528	1215.16	528.46
2	3373	1411.12	1343.59	2		2	15232	1665.65	803.529			6	24529	5187.04	774.354
2	3374	2297.76	1260.47	2		2	15233	2760.56	888.375			6	24530	3200.08	665.98
2	3375	1011.38	1338.06	2		2	15235	3240.21	866.684			6	24531	4404.96	716.531
2	3376	4629.69	1427.25	2		2	15236	1134.68	833.579			6	24532	3551.98	690.396
2	3377	1706.69	1087.69	2		2	15237	1721.06	838.188			6	24533	10588.3	876.388
2	3380	1507.29	1629.53	2		2	15238	6052.41	1074.29			6	24534	5414.02	678.75
2	3384	1014.31	886.875	2		2	15244	1037.6	785.133			6	24535	1263.39	563.327
2	3389	1196.71	911.235	2		2	15245	3109.5	866.222			6	24537	17826.3	1087.1
2	3391	1372.75	791.438	2		2	15246	2580.75	945.25			6	24539	21443.8	1187.37
2	3393	1018.19	821.313	2		2	15247	4830	1119.53			6	24540	1446.06	652.902
2	3396	1084.36	818.857	2		2	15248	1274.56	924.75			6	24541	1680.84	631.592
2	3397	1182.72	798.389	2		2	15249	9422.05	1248.85			6	24542	1673.06	634.702
2	3400	1171.93	663.214	2		2	15251	1281.06	940.5			6	24543	1291.43	615.915
2	3402	2031.18	1430.71	2		2	15252	2697.13	990.938			6	24544	1238.63	631.813
2	3403	1096.56	1400.56	2		2	15253	1624.44	828.667			6	24547	1347.79	563.442
2	3404	1018.06	1586.69	2		2	15254	1824.85	885.1			6	24548	1031.8	648.122
2	3405	1013.13	2022.69	2		2	15255	19412.6	1228.24			6	24550	1320.8	636.102
2	3407	1639.71	1471.57	2		2	15256	3152.82	847.471			6	24552	1211.32	598.383
2	3408	1457.31	1216.81	2		2	15257	2192.17	901.278			6	24553	1408.59	635.863
2	3409	1487.87	1354.8	2		2	15258	6375.45	968.05			6	24555	35244	1628.42
2	3410	3990.11	1759.33	2		2	15259	2435.72	851.722			6	24556	28721.9	1408.33
2	3412	1381.94	1141.13	2		2	15261	2108.6	834.267			6	24557	44019.3	1649.59
2	3413	1066.5	1631.06	2		2	15262	1239.83	793.056			6	24558	32313.9	1354.52
2	3415	1035.83	1113.39	2		2	15269	4309.25	1130.19			6	24559	29665.4	1367.8
2	3416	1069.38	1026.69	2		2	15270	2112.35	974.059			6	24560	17753.9	1179.47
2	3418	1146.31	1092.19	2		2	15271	54975.4	7291.38			6	24561	17696.8	1122.38
2	3419	1116.13	1127.25	2		2	15272	1124.29	925.706			6	24562	16806.5	1105.63
2	3420	1108.07	1112.73	2		2	15274	2329.69	711.938			6	24563	18931.5	1167.86
2	3421	1389.67	1069.4	2		2	15275	1174.72	712.889			6	24564	14772.9	1056.71
2	3422	1446.5	1039.63	2		2	15276	1029.68	666.526			6	24565	20270	1166.92
2	3424	1442.87	1326.6	2		2	15277	1028.28	789.778			6	24566	14565.6	1102.48
2	3425	1052.94	1038.24	2		2	15278	1030.95	1510.26			6	24567	16027	1089.2
2	3426	1181.88	1186.94	2		2	15280	1423.53	994.294			6	24568	16823.4	1156.6
2	3427	1854.07	1901.93	2		2	15281	2983.81	1522.25			6	24569	1630.57	830.383
2	3428	1094.56	1215.06	2		2	15282	1183.7	1001.35			6	24570	1521.42	846.72
2	3429	1449.45	963.9	2		2	15285	1977.44	1640.89			6	24571	16689.4	1167.4
2	3431	1714.94	1101.5	2		2	15289	1369.47	938			6	24572	17945.8	1119.52
2	3432	1689.81	1078.56	2		2	15294	1174.41	878.059			6	24573	17638	1158.88
2	3433	1054.06	1114.31	2		2	15295	1099.06	1240.59			6	24574	17546.5	1138.06
2	3434	1647	1862.31	2		2	15297	1339.14	1147			6	24575	1682.56	865.92
2	3435	1021.93	1567.43	2		2	15300	1570.85	840.9			6	24576	7674.13	955.362
2	3437	2114.19	1504.31	2		2	15304	1050.84	1022.95			6	24577	6891.65	946.941
2	3440	1451.63	1118	2		2	15305	1082	1213.56			6	24578	6955.51	949.234
2	3444	1018.13	1068.87	2		2	15309	1090	1151.64			6	24579	7104.69	946.688
2	3446	1492.6	1101.87	2		2	15312	1307.31	759.063			6	24580	6860.6	958
2	3447	1778.18	1455.12	2		2	15314	1073.74	753.053			6	24581	7272.87	922.261
2	3448	3472.36	1251.93	2		2	15315	1251.71	717.412			6	24582	6859.26	949.3
2	3449	1221.61	1199.22	2		2	15321	2170	914.25			6	24583	7195.8	939.196
2	3450	1238.2	1449.27	2		2	15322	3296.94	1108.94			6	24584	6874.85	905.34
2	3451	1568.11	934.444	2		2	15323	2323.73	883.267			6	24585	6399.15	906.447
2	3452	1671.12	1027.65	2		2	15324	1619.88	847.188			6	24586	6820.73	915.918
2	3454	1045.9	1206.2	2		2	15325	1765.5	845.313			6	24587	1438.67	788.083
2	3460	1389.38	1294.94	2		2	15326	1665.72	808.667			6	24588	1463.98	802.94
2	3462	2248.88	1627.71	2		2	15327	2127.28	875.833			6	24589	1698.92	889.68
2	3464	1081.29	1217.47	2		2	15328	1820.11	845.667			6	24590	1474.12	803.755
2	3466	3258.69	1139.25	2		3	15330	14693.3	746.813			6	24591	1454.81	810.542
2	3471	1287.14	929.5	2		3	15331	1018.56	784.167			6	24592	1595.5	822.02
2	3473	1257.06	1004.19	2		3	15332	1331.65	647.294			6	24593	1901.42	1148.2
2	3474	1219.12	1033.94	2		3	15333	1135.63	675.438			6	24597	1113.92	853.635
2	3475	1104.4	880.15	2		3	15334	2099.39	670.833			6	24598	1025.74	1036.72
2	3486	1656.47	893.4	2		3	15337	1085	685.2			6	24599	1665.46	1008.31
2	3487	1628.78	981.333	2		3	15338	1017.95	666.842			6	24600	1023.02	863.625
2	3488	1030.75	1112.5	2		3	15339	5258.06	773.056			6	24601	1014.37	864
2	3490	1072.44	1289.69	2		3	15340	1182	695.563			6	24602	1236.18	849.471
2	3493	1068.25	808.875	2		3	15341	3034.12	831.882			6	24603	1328.88	848.412
2	3495	3266.85	1267.6	2		3	15342	1254	667			6	24604	2666.84	747.719
2	3496	1217.61	775.833	2		3	15343	2325.8	750.733			6	24605	16099.6	950
2	3497	1408.88	896.188	2		3	15344	1249.78	657.333			6	24606	1375.3	768.362
2	3499	1184.47	649	2		3	15346	2716.75	787.188			6	24607	1520.57	950.612
2	3500	1946.61	1295.22	2		3	15347	2767.47	775.412			6	24608	1339.24	785.471
2	3501	1045.44	699.5	2		3	15348	1607.5	826.389			6	24609	1261.36	897.92
2	3502	1111.38	869	2		3	15353	8294.11	788.333			6	24610	1211.55	689.755
2	3503	1185.13	807.063	2		3	15356	1003.94	760.353			6	24611	1426.54	776.74
2	3505	1199.89	1149.33	2		3	15357	1237	782.214			6	24612	1460.35	799.604
2	3506	1235.53	1188.59	2		3	15358	1211.47	783.733			6	24613	1415.54	728.396
2	3507	1405.93	971.733	2		3	15360	1031.79	790.5			6	24614	15791.2	996.269
2	3508	1150.27	1070.2	2		3	15364	1024.17	794.222			6	24617	4281.46	714.042
2	3509	1026	1144.94	2		3	15365	1098.37	710.632			6	24618	1417.94	565.286
2	3512	1058.11	1851.33	2		3	15370	1311.75	764.25			6	24619	4271.35	702.286
2	3515	1027.22	1221.28	2		3	15372	1013.27	751.133			6	24620	2789.51	646.596
2	3518	1381.86	1137.43	2		3	15373	1061.52	820.143			6	24621	21050.3	4178.78
2	3519	1476.13	1021.31	2		3	15374	1003.73	808.2			6	24622	21494.4	1058.04
2	3520	1020.76	922.588	2		3	15377	1086.82	905.353			6	24623	14360	915.813
2	3531	2238.06	1063.06	2		3	15378	1004	838			6	24624	16418.1	988.042
2	3533	1087.53	1073.12	2		3	15381	1495.58	802.579			6	24625	14845.7	927.837
2	3535	1063.31	1207.75	2		3	15382	1418.56	726.625			6	24626	14716.2	925.041
2	3536	2769.12	1013.06	2		3	15383	1335.13	751.75			6	24627	1471	633.755
2	3537	1565.44	847.875	2		3	15384	1167.69	830.375			6	24628	1388.56	619.979
2	3538	1072.89	1030.37	2		3	15385	1294.27	692.6			6	24629	1724.38	643.792
2	3540	1083.35	1017.59	2		3	15392	1020.33	624.133			6	24630	1453.17	628.462
2	3541	1186.56	1362	2		3	15395	1527.78	712.333			6	24631	1743.67	647.449
2	3542	1024.82	842.647	2		3	15399	1005.33	682.6			6	24632	1761.02	862.878
2	3543	11396.8	1754.88	2		3	15402	1463.58	710.053			6	24638	30440.5	1433.29
2	3546	4375.79	1018.71	2		3	15405	1475.94	731.25			6	24639	19263.3	1265.8
2	3547	1546.28	950.611	2		3	15406	1508.88	800.563			6	24640	1081.16	785.592
2	3548	1360.13	905.5	2		3	15407	1529.53	729.529			6	24641	1314.81	819.192
2	3549	3919.41	1040.41	2		3	15410	1018.24	796.647			6	24642	1309.57	814.34
2	3550	1101.44	1190.56	2		3	15411	1136.94	780.471			6	24643	1367.12	794.157
2	3551	3206.94	1036.5	2		3	15412	1209.56	777.222			6	24644	1197.36	825.26
2	3552	1413.17	1025.44	2		3	15413	1106.41	808			6	24646	1298.98	807.569
2	3553	5110.88	982.529	2		3	15414	1113	757.688			6	24647	1201.65	826.918
2	3554	1803.12	1053.71	2		3	15415	1188.35	833.059			6	24648	1239.88	814.163
2	3556	1059.56	711.056	2		3	15416	1166.4	947.4			6	24649	1620.78	877.176
2	3560	1432.29	972.941	2		3	15417	1293.5	887.278			6	24650	1278.37	853.373
2	3562	1124.88	1146.94	2		3	15418	1189.67	1069.56			6	24651	1246.43	922
2	3564	1780.19	971.938	2		3	15419	2259.06	941.688			6	24652	1130.12	836.08
2	3565	1620.59	1248	2		3	15420	1202.22	830.444			6	24659	2637.86	753.765
2	3567	26444.8	2640.25	2		3	15421	1521.94	1153.94			6	24661	1276.92	707.833
2	3568	1039.59	1034.65	2		3	15423	1178.75	848.063			6	24663	1359.39	704.02
2	3569	35880.5	3204.8	2		3	15427	2865.19	1124.44			6	24664	1402.12	752.56
2	3575	1425.56	972.611	2		3	15428	1705.53	854.059			6	24666	1171.36	724.82
2	3576	1036	790.563	2		3	15429	1005.81	1003.25			6	24668	21272.1	1423.77
2	3577	1068.27	893.2	2		3	15430	1830.27	875.733			6	24672	1535.12	916.62
2	3578	1063.94	864.188	2		3	15431	1107.36	711.643			6	24673	1422.71	693.933
2	3579	1074.13	845	2		3	15432	1271.88	749.059			6	24679	1593.23	688.942
2	3581	7305.68	1370.63	2		3	15433	1003.19	811.375			6	24680	1587.18	711.98
2	3582	1329.6	945.733	2		3	15434	1105.19	713.375			6	24681	1461.94	768.122
2	3583	2597.27	1011.33	2		3	15448	24263.7	1086.37			6	24682	1580.63	753.083
2	3584	5190.81	1153.31	2		3	15449	2686.67	798			6	24688	1255.44	907.1
2	3585	1417.78	887.389	2		3	15450	2687.71	835.294			6	24693	2320.09	869.911
2	3586	1706.67	1036.61	2		3	15451	3284.8	752.733			6	24695	26791.9	1345.68
2	3587	1169.37	903.421	2		3	15454	2485.94	740.688			6	24701	24723.6	1327.47
2	3588	1244.64	945.714	2		3	15456	1554.5	733.75			6	24702	34481.5	1494.06
2	3590	4069.06	1078.47	2		3	15460	1102.44	749.813			6	24703	1633.21	642.021
2	3591	17339.5	1567.4	2		3	15461	1272.94	707.353			6	24704	1007.45	647
2	3592	11092.7	1199.72	2		3	15462	1249.11	668.722			6	24705	23304.7	1269.69
2	3593	1274	952	2		3	15463	1213.24	812.706			6	24706	24954	1289.12
2	3594	4970.11	1204.78	2		3	15466	1127.44	743.611			6	24707	30857.8	1487.83
2	3595	1145	888.167	2		3	15467	1211.63	710.875			6	24708	26525.6	1362.5
2	3596	2620	999.412	2		3	15468	1170.6	764.867			6	24709	1670.08	647.98
2	3597	1791.24	1013.29	2		3	15469	1067.87	661.067			6	24710	1084.96	658.255
2	3599	2525.06	1086.41	2		3	15470	1088.71	713.176			6	24711	1056.08	666.98
2	3600	1075.75	886.313	2		3	15471	1005.53	766.588			6	24713	2470.62	1069
2	3602	5860.38	1035	2		3	15473	1306.75	698.063			6	24715	1168.49	552.872
2	3605	1496.42	789.105	2		3	15480	1054.24	654.353			6	24716	1091.07	678.304
2	3606	1958.13	822.25	2		3	15482	8122.94	1095.75			6	24717	2019.1	612.1
2	3608	1176.93	1115.93	2		3	15483	1418.71	1259.14			6	24718	2647.67	631.204
2	3611	1063.94	782.313	2		3	15484	1426.56	910.688			6	24719	1145.75	558.771
2	3612	1001.41	804.353	2		3	15486	1067	1213.53			6	24720	1809.52	586.913
2	3613	1112.19	847.063	2		3	15487	1609.88	1075.59			6	24721	2922.08	630.673
2	3615	1028.44	843.625	2		3	15488	1266.6	865.2			6	24722	1726.63	593.837
2	3616	1632.25	944.563	2		3	15489	1166.5	887.063			6	24723	1112.12	570.8
2	3617	1071.74	906.316	2		3	15490	1331.33	876			6	24724	2585.43	627.37
2	3618	1075.36	813.714	2		3	15491	1188.56	863.813			6	24726	1936.54	602.261
2	3623	2194.25	852.938	2		3	15492	1183.94	876.25			6	24727	1088.85	560.438
2	3625	3943.63	849.313	2		3	15502	1060.87	866			6	24728	1856.02	594.84
2	3626	46513.9	8054.53	2		3	15503	1120.47	832.733			6	24729	1410.02	604.022
2	3627	55155.2	9626.06	2		3	15504	1237.63	818.316			6	24730	3390.85	1464.17
2	3628	1684.73	800.533	2		3	15505	1081.79	805.5			6	24731	1749.96	859.061
2	3629	1056.44	692.063	2		3	15506	1127.88	835.625			6	24732	1689.16	887.42
2	3630	1062.33	793.667	2		3	15507	1087.8	775.467			6	24733	1780.84	850.18
2	3631	1046.81	643.438	2		3	15508	1155.5	808.944			6	24735	6855.43	909.83
2	3634	1064.06	885.765	2		3	15509	1004.94	846.588			6	24736	1011.77	837.692
2	3635	1006.38	803.063	2		3	15510	4042.71	871.824			6	24740	2625.79	1287.08
2	3637	1208.69	1026.31	2		3	15511	25178.9	1313.21			6	24741	35370.7	1932.39
2	3638	1162.25	856.125	2		3	15512	1118.33	786.524			6	24742	38752.5	1949.94
2	3639	1044.56	899.125	2		3	15513	1220	872.222			6	24743	4939.81	965
2	3643	1013.53	804.647	2		3	15514	1208.17	811.833			6	24744	1943.7	805.87
2	3644	1096.94	928.176	2		3	15516	1008.12	883.176			6	24745	44423.9	2058.63
2	3645	1086.94	779.278	2		3	15522	1125.79	851.143			6	24746	46459.6	2155.26
3	3647	1058.53	740	3		3	15523	1156.44	772.563			6	24747	39352.6	1858.28
3	3657	1443	755.158	3		3	15526	1249.17	827.944			6	24748	2567.22	825.653
3	3660	1139	804.813	3		3	15527	1300.94	874.438			6	24749	1233.39	798.735
3	3662	1604.33	700.524	3		3	15528	1187.61	783.611			6	24753	1471.79	941.319
3	3663	13788.2	1092.37	3		3	15529	1058.12	824.412			6	24754	1031.27	853.612
3	3664	1192.74	689.105	3		3	15530	1131.13	822.938			6	24757	38411.4	1432.08
3	3665	1160.06	783.063	3		3	15531	1154.63	773.063			6	24761	39346	1474.37
3	3667	1054.25	862.75	3		3	15532	1061.33	864.167			6	24763	39464.6	1489.44
3	3670	1380.25	705.15	3		3	15533	1160.25	806.625			6	24764	29186.1	1311.69
3	3671	1060.5	655.278	3		3	15534	1086.38	781.688			6	24765	26577.7	1233.96
3	3672	7177.81	1018.63	3		3	15536	1155.4	818.533			6	24766	29342.7	1275.9
3	3673	1002.63	777.813	3		3	15537	1126.47	843.733			6	24767	4107.98	1031.37
3	3675	1129.76	865.706	3		3	15538	1152	831			6	24768	1052.4	895.889
3	3676	1010.22	837.833	3		3	15539	1057.06	861.765			6	24771	1030.25	720.813
3	3677	1119.63	716.75	3		3	15540	1070.07	798.714			6	24777	31992	1337.96
3	3678	1155.19	695.625	3		3	15548	1066.85	760.6			6	24780	2963.83	727.167
3	3679	1463.35	757.765	3		3	15549	1014.83	732			6	24783	3068.67	733.519
3	3684	1279.63	703.938	3		3	15550	1031.75	743.875			6	24784	1792.61	987.667
3	3685	1411.35	758.8	3		3	15551	1022.81	747.063			6	24785	1343.08	901.49
3	3689	1101.11	831.684	3		4	15556	1181.82	567			6	24789	1000.14	702.902
3	3691	1957.56	948.5	3		4	15557	1278.83	549.778			6	24790	3006.43	850.224
3	3692	1040	779.067	3		4	15558	1328.06	577.813			6	24791	2995.67	827.813
3	3694	1879.86	784.476	3		4	15559	1569.38	599.625			6	24792	1005.1	743.429
3	3695	2144.47	774.421	3		4	15560	1446.94	581.059			6	24793	3389.14	865.776
3	3696	1527.87	732.4	3		4	15561	2718	620.118			6	24794	3173.68	820.32
3	3698	1152.95	827.5	3		4	15562	2022.69	582.75			6	24795	2919.21	784.702
3	3699	1015.07	853.429	3		4	15563	2890.61	624.056			6	24796	3871.26	850.17
3	3700	1844.41	798.647	3		4	15564	1977.11	575.105			6	24797	3548	835.191
3	3702	1596.72	715.778	3		4	15565	5174.56	694.889			6	24798	3432.73	842.843
3	3703	3737.9	871.476	3		4	15566	1002.25	579.938			6	24800	1042.45	770.377
3	3704	1055.44	913.125	3		4	15568	1061.13	837.813			7	24810	1526.13	926.313
3	3710	1421.94	737.778	3		4	15569	1029.5	783.611			7	24812	1691.5	1226.61
3	3711	1026.75	709.563	3		4	15570	1153.94	764.5			7	24814	1569.12	1179.65
3	3712	3940.13	1061.07	3		4	15571	1623.13	802			7	24829	1078.94	1193.69
3	3713	1409.06	804.765	3		4	15572	1043.57	598.714			7	24838	1064.75	1612.44
3	3718	1483.75	809.813	3		4	15573	1010.94	626.75			7	24839	1853.25	1184.6
3	3719	1398	837.706	3		4	15574	1409.89	652.944			7	24845	1047.75	1823.44
3	3721	3726.56	886.625	3		4	15575	1408.26	642.895			7	24849	1045.31	2131.19
3	3722	2799.32	916.211	3		4	15576	1396.38	649.688			7	24861	1018.47	1943.95
3	3723	1000.75	1212.13	3		4	15578	1320.8	642.4			8	24870	1555.18	668.85
3	3724	1036.93	704	3		4	15579	3695.84	1100.42			8	24871	1370.47	615.023
3	3725	1225.47	698.533	3		4	15580	1096.89	620.611			8	24872	1416.81	599.814
3	3726	1148.5	747.833	3		4	15582	1112.87	652.267			8	24873	11070.4	909.073
3	3727	1433.31	693.188	3		4	15587	1443.53	628.2			8	24875	6339.91	770.093
3	3728	1199.69	816.938	3		4	15588	1455.41	622			8	24876	5758.42	747.733
3	3729	32826.5	1535.42	3		4	15589	1525.65	609.353			8	24877	2174.7	781.791
3	3732	1055.88	940.353	3		4	15590	1180.81	603.625			8	24878	2585.66	764.318
3	3733	1091.47	902.941	3		4	15596	1157.53	561			8	24879	2413.24	789.405
3	3734	1475.24	879.667	3		4	15597	1125.94	557.353			8	24880	6987.86	961.442
3	3735	1187.6	983	3		4	15599	1052.38	571.188			8	24881	2385.32	791.159
3	3736	1048	873.368	3		4	15600	1023.71	592.647			8	24882	6111.28	860.804
3	3737	1181.31	979	3		4	15601	1783.72	1120.11			8	24883	2228.16	774.295
3	3738	1123.81	889.313	3		4	15603	1081.95	1029.76			8	24884	2478.43	791.333
3	3740	1010.19	873.625	3		4	15604	1058.39	672.889			8	24885	2211.34	820.851
3	3743	1091.25	973.25	3		4	15605	1539.9	697.55			8	24886	4347	888.727
3	3744	1057.38	916.5	3		4	15606	1144.72	718.333			8	24887	2142.49	799.86
3	3747	1199.87	921	3		4	15607	1054.33	830.722			8	24888	5329.83	926.696
3	3749	1322.87	895.696	3		4	15608	1440.81	703.375			8	24889	1435.73	932.386
3	3750	1195.69	872.813	3		4	15609	1418.13	763			8	24890	1252.02	774.5
3	3753	1028.44	917.688	3		4	15613	3081.06	1121.72			8	24891	1241.17	790.927
3	3754	1203.73	1071.67	3		4	15614	1268.89	982			8	24893	2330.15	806.087
3	3755	1169.53	1067.05	3		4	15615	1112.35	1091.59			8	24894	1054.32	806.727
3	3756	1152.13	1057.87	3		4	15616	1252.05	1004.62			8	24895	1163.13	844.565
3	3757	1002.61	752.5	3		4	15619	1035.05	1011.26			8	24896	3151.86	807.524
3	3758	1081.58	826.474	3		4	15620	1280.63	729.313			8	24897	3876.39	841.091
3	3760	1025.29	806.294	3		4	15621	1231.69	648.75			8	24898	4200.04	859.756
3	3767	1125.63	789.75	3		4	15622	1339	684.5			8	24900	2993.65	836
3	3768	2098.88	901.125	3		4	15623	1182.61	654.5			8	24904	1766.77	640.932
3	3770	2469.06	802.412	3		4	15626	8581.94	1380			8	24905	21697.2	1244.59
3	3771	3664.8	880.867	3		4	15628	16184.2	2528.38			8	24906	1793.82	672.689
3	3772	1874	935.563	3		4	15629	1082.67	740.556			8	24907	9984.6	883.395
3	3773	1298.1	810.35	3		4	15630	1052.76	725.529			8	24908	4397.44	741.951
3	3774	1808.38	870.75	3		4	15633	1465.82	702			8	24909	4262.45	741.591
3	3777	1396.81	737.188	3		4	15634	1099.05	609.579			8	24910	2070.27	732.61
3	3779	1855.37	967.368	3		4	15635	1174.72	634.556			8	24911	3874.14	766.262
3	3784	1362.73	874.533	3		4	15638	2212.5	1020.31			8	24912	15204.5	996.2
3	3786	1339.73	806.067	3		4	15641	1322.44	1264.25			8	24913	13825.5	1012.93
3	3787	1376.42	835.684	3		4	15642	1026.5	902.333			8	24914	4785.86	791.659
3	3790	1987.67	949.333	3		4	15643	1035.06	1110.78			8	24915	1768.15	697.63
3	3791	1022.39	1169.78	3		4	15644	1110.06	1266.78			8	24916	11320.3	930.886
3	3806	1263.78	762.833	3		4	15652	1192.25	1169.44			8	24917	15466.5	1080.66
3	3811	1227.41	787.765	3		4	15653	1659.07	1631.8			8	24919	13203.6	964.705
3	3812	1281.5	852.167	3		4	15654	1009.44	1133.75			8	24921	1071.2	677.022
3	3813	1282.78	830.556	3		4	15658	1004.9	1198.75			8	24922	11582.5	970.071
3	3818	2929.81	1235.88	3		4	15663	1032.44	1017.25			8	24924	11037	940.109
3	3823	1859.72	908.222	3		4	15664	1172.75	946.688			8	24925	1147.69	727.5
3	3826	1278.39	807.444	3		4	15665	1274.87	867.867			8	24926	1249.48	740.455
3	3827	1085.63	787.105	3		4	15667	2355.56	1049.06			8	24927	1216.73	730.727
3	3828	1513.82	864.353	3		4	15668	1049.95	839.368			8	24928	1133.35	762.767
3	3831	1295.22	824.611	3		4	15672	1088	799.941			8	24930	1185.14	733.114
3	3832	1537.11	1019.37	3		4	15673	1481.75	886.625			8	24931	1067.59	680.826
3	3834	1013.31	930.438	3		4	15674	1152.17	859.667			8	24933	1033.41	725.727
3	3841	1175.63	831	3		4	15675	1118.82	783.059			8	24934	1236.83	738.717
3	3843	2232.32	1096.11	3		4	15676	2271.07	940.467			8	24935	1145.72	746.837
3	3844	1099.4	741.867	3		4	15677	1955.47	972			8	24939	12637	993.571
3	3845	1334.5	887.625	3		4	15678	1992.82	940.471			8	24940	22086.7	1214.72
3	3846	1405.25	1049.19	3		4	15680	1095.56	902.188			8	24941	5959.85	797.122
3	3847	1355.25	910.75	3		4	15681	2153.94	944.059			8	24942	13442.9	980.261
3	3848	1163.5	896.944	3		4	15682	1065.76	870.765			8	24943	6107.31	783.429
3	3849	1134.39	1080.5	3		4	15683	1652.5	883.778			8	24944	6117.02	788.295
3	3850	1211.76	855.765	3		4	15684	2085.56	935.75			8	24945	5735.55	753
3	3852	1205.53	690.368	3		4	15685	2107.13	993.688			8	24946	5927.35	750.429
3	3853	1061.12	763.647	3		4	15687	1164.65	999.471			8	24947	11299.1	944.275
3	3854	1048.5	689	3		4	15689	1020.69	837.063			8	24948	3714.48	710.217
3	3861	1309.71	1314.06	3		4	15693	1150.41	895.882			8	24949	2940.36	679.864
3	3867	1309.67	1161.53	3		4	15694	1188.67	879			8	24950	2710.51	652.622
3	3870	9744.31	1248.25	3		4	15695	1141.39	846.222			8	24951	2728.7	671.565
3	3871	1220.88	926.706	3		4	15696	1172.41	878.176			8	24952	3504.02	691.085
3	3872	1272.25	938.813	3		4	15697	1186.47	864.733			8	24955	1855.47	931.07
3	3873	1170.35	928.3	3		4	15698	1253.75	880.188			8	24956	1157.24	924.857
3	3874	1259.5	1075.61	3		4	15699	1353.47	834.533			8	24957	6258.49	779.867
3	3875	1712.29	980.118	3		4	15704	1511.52	896.048			8	24958	1067.98	721.625
3	3878	1133.63	850	3		4	15705	1439.82	922.588			8	24959	1283.61	717.136
3	3887	1020	811.471	3		4	15706	1357.5	976			8	24960	1125.05	762.122
3	3890	1079.89	1281.89	3		4	15707	1077.84	880.579			8	24961	1379.42	740.977
3	3893	1018.06	676.111	3		4	15708	1330.76	825.952			8	24962	1051.02	675.372
3	3894	2422.15	787.3	3		5	15729	1187.06	760.529			8	24964	1251.62	874.511
3	3896	1408.15	1697.3	3		5	15737	1584.06	768.875			8	24965	2355.3	884.75
3	3897	1253.11	1311.06	3		5	15738	1504.75	784.938			8	24966	1166.09	884.045
3	3900	1238.1	979.95	3		5	15739	1042.67	673.933			8	24968	1461.76	853.565
3	3901	5244.52	1078.33	3		5	15740	1922.75	759.75			8	24969	1170.77	1229.27
3	3902	1439.56	916.875	3		5	15757	1518	900.471			8	24970	1352	858.318
3	3903	1374.69	878	3		5	15758	1258.94	805.5			8	24971	1499.38	868.111
3	3904	1217.78	886.611	3		5	15773	1159.12	983.176			8	24973	1248.73	856.489
3	3905	1287.59	958.529	3		5	15777	1230	939.857			8	24974	1309.22	831.37
3	3906	1287.69	917.125	3		5	15778	1035.67	877.867			8	24975	1472.47	1090.76
3	3907	1255.9	943.15	3		5	15779	1143.07	824.667			8	24976	1414.82	913.682
3	3909	1338.11	1157.39	3		5	15785	1171.29	862.941			8	24977	4377.91	1252.07
3	3910	1329.67	1253.78	3		5	15786	1195.4	886.2			8	24978	1679.98	856.532
3	3911	1791.39	1132	3		5	15787	1147.2	965.533			8	24979	1742.26	881.319
3	3912	1355.94	1025.5	3		5	15788	1087.87	844.867			8	24982	1417.64	845.19
3	3913	1551	1026.53	3		5	15790	1074.44	837.563			8	24983	1671.29	892.878
3	3914	1393	979.5	3		5	15798	1075.94	681			8	24984	1123.57	778.383
3	3915	1454.93	992	3		5	15823	1538	711.125			8	24985	1654.4	793.744
3	3916	1356.13	908.063	3		5	15825	1263.88	1036			8	24986	1153.91	1065.38
3	3917	1293.31	985.125	3		5	15832	1318.47	929			8	24987	1602.08	894.837
3	3918	1329.63	968.25	3		5	15834	1601.79	1086.07			8	24988	1320.79	955.188
3	3919	1476.19	1062.13	3		5	15837	1000.21	765.857			8	24989	1393.72	997.512
3	3920	1308.94	1055.06	3		5	15838	1120.29	799.5			8	24991	7776.02	1160.43
3	3921	1233.25	1012.65	3		5	15841	2115.2	949.6			8	24992	5762.06	1107.72
3	3923	30771.2	1595.33	3		5	15848	1967.33	868.556			8	24993	3114.85	794.583
3	3925	1187.33	952.056	3		5	15849	1391.88	856.125			8	24994	1777.18	794.886
3	3926	1268.82	971.882	3		5	15853	1016.81	825.25			8	24995	1863.96	973.109
3	3927	1093.11	945.889	3		5	15854	1254.24	888.176			8	24996	1433.54	808.804
3	3928	1080.11	947.556	3		5	15859	1333.47	1006.84			8	24997	1425.82	825.773
3	3929	1009.88	944.059	3		5	15877	1012.4	756.4			8	25000	4952.24	1072.94
3	3932	1247	860.111	3		6	15890	4204.15	779.2			8	25001	1952.7	893.545
3	3934	1005.29	721.706	3		6	15891	3433.63	810.438			8	25002	1536.29	878.463
3	3936	1389.89	713.211	3		6	15892	1409.06	821.313			8	25007	1012.64	768.273
3	3937	1263.31	727.5	3		6	15893	3978.82	792.706			8	25008	1025.4	742.628
3	3938	1262.94	725.353	3		6	15894	4346.94	759.563			8	25011	1611.48	825.783
3	3939	1102.22	722.278	3		6	15896	1020	717.176			8	25014	1220.21	800.298
3	3941	1280.63	1078.5	3		6	15899	1121.9	486.1			8	25018	1561.73	788.4
3	3943	1246.4	934.4	3		6	15900	1081.06	618.938			8	25019	1001.25	715.477
3	3946	1032.89	940.833	3		6	15905	3749.63	727.813			8	25025	7382.57	843.25
3	3947	1192.56	855.5	3		6	15906	1202.22	518.833			8	25026	5224.23	830.511
3	3948	1238.06	834.647	3		6	15907	1438.5	698.5			8	25027	5521.93	835.091
3	3949	1185.5	856.5	3		6	15908	1058.05	571.842			8	25029	1717.86	708.93
3	3950	1010.29	857.882	3		6	15909	1040.67	546.8			8	25032	14191.3	1017.84
3	3953	1025.8	824.55	3		6	15912	8087.06	908.563			8	25036	1283.69	957.8
3	3959	1181.82	825.294	3		6	15913	1205.13	579.25			8	25038	1478.33	925.024
3	3961	1026.06	826.688	3		6	15914	1032.35	630.45			8	25040	1059.69	1147.29
3	3964	1001.56	724.5	3		6	15916	1009.63	662.579			8	25041	2021.78	1053.35
3	3965	1054.42	968.421	3		6	15918	1106.55	518.818			8	25042	1926.07	1172.75
4	3966	3651.62	597.81	4		6	15919	3830.13	606.938			8	25043	1990.96	868.978
4	3972	1079.07	604.6	4		6	15920	1024.88	578.375			8	25046	2208.82	877.711
4	3973	1052	576.625	4		6	15921	1175.8	646.933			8	25047	3285.09	948.778
4	3974	1106.33	577.333	4		6	15922	31742	2397.68			8	25048	3099.2	896.109
4	3975	1176.33	570.6	4		6	15923	24597.6	1855.44			8	25049	2698.42	893.372
4	3977	1154.75	606.688	4		6	15924	24576.5	1950.05			8	25050	1667.23	829.875
4	3978	1271.65	592.176	4		6	15925	3203.35	795			8	25052	4033.61	918.795
4	3979	3336.38	874	4		6	15926	1026.44	783.875			8	25053	3002.85	885.609
4	3981	1217.13	927.125	4		6	15927	2533.39	929.778			8	25054	2416.31	901.024
4	3983	1341.39	608.444	4		6	15928	3963.94	813.688			8	25055	2936.32	940.979
4	3984	1502.69	625.563	4		6	15929	1033.13	745.313			8	25056	1321.05	961.122
4	3985	1393.63	574.063	4		6	15930	1074.67	760.889			8	25059	1001.67	1002.24
4	3986	1133.26	573.579	4		6	15931	3521.06	1014.61			8	25060	1003.71	939.762
4	3988	1471.79	580	4		6	15933	2294.38	825.75			8	25061	1141.05	952.091
4	3997	1085.53	936.824	4		6	15934	2095.61	798.667			8	25062	1004.77	975.341
4	4001	1010.13	593.813	4		6	15935	1781.25	841			8	25064	1172.77	959.674
4	4004	1957.07	622.733	4		6	15936	1186.44	857.278			8	25065	1103.91	966.733
4	4009	1277.61	699.444	4		6	15937	8925.28	1317.78			8	25066	1182.88	959.738
4	4010	1865.57	603.476	4		6	15938	4855.21	897.895			8	25067	1222.33	1012.88
4	4011	1702.81	684.625	4		6	15939	2321.7	897.7			8	25070	1063.4	1011.09
4	4012	1291.29	686.588	4		6	15940	1864.19	783.938			8	25071	1050	965.391
4	4013	1409	681.167	4		6	15941	2804.32	911.158			8	25072	4889.3	1067.53
4	4016	2445.76	808.118	4		6	15942	6141	910.133			8	25074	1120.1	1049.54
4	4017	1508.06	691.833	4		6	15943	2736.44	832.375			8	25075	1085	821.625
4	4019	1260.29	687	4		6	15944	2529.85	794.15			8	25076	1081.02	882.341
4	4022	2000.06	670.75	4		6	15945	1220.22	804.278			8	25077	1554.48	865.205
4	4023	2508.94	691.647	4		6	15946	1304.73	743			8	25078	1170.49	842.2
4	4025	18536.8	3447	4		6	15947	1261.59	740.647			8	25079	6094.85	947.638
4	4027	1016.67	1156.93	4		6	15948	14003.1	1019.39			8	25080	1281.5	915.478
4	4028	1070.14	1435.43	4		6	15949	14639.9	1026.75			8	25081	2675.93	882.905
4	4032	1123.47	942.235	4		6	15950	11346.4	952.563			8	25083	6985.4	1032.16
4	4034	1456.6	954.2	4		6	15951	11772.4	968.278			8	25084	5471.49	1049.42
4	4035	1121.73	976.933	4		6	15952	12753.3	998.688			8	25085	4786.66	963.523
4	4037	1348.63	1128	4		6	15953	12635.9	1009.88			8	25086	4423.51	896.558
4	4038	1459.47	1047.53	4		6	15954	2383.06	973.941			8	25087	1266.62	800.756
4	4039	1361.95	964.211	4		6	15955	6845.88	974.063			8	25088	1197.93	841.778
4	4040	1050.35	1124.47	4		6	15957	1026.29	898.647			8	25089	1910.7	891.581
4	4041	1148.94	971.063	4		6	15959	6318.75	888.938			8	25090	1182.02	867.122
4	4046	1282.29	1222.59	4		6	15960	2904.62	868.048			8	25091	3754.35	955.047
4	4049	1063.87	1533.07	4		6	15961	1332.06	828.889			8	25092	2693.23	922.205
4	4052	1143.65	1229.35	4		6	15963	8867.89	875.579			8	25093	1158.86	907.159
4	4054	1435.88	806.353	4		6	15964	7064.75	860			8	25094	4607.64	969.75
4	4055	1118.56	747.375	4		6	15965	6703.94	836.75			8	25096	1415.61	838
4	4056	1157.5	826.889	4		6	15966	1722.5	626.55			8	25097	1151.39	830.227
4	4059	3351.39	1456.39	4		6	15967	9565	905.278			8	25098	1059.33	810.023
4	4060	1358.36	821.571	4		6	15968	9137.83	889.389			8	25100	1315.95	825.227
4	4061	1339.53	801.412	4		6	15970	9424.31	919.813			8	25101	7337.8	996.082
4	4062	1169.63	842.188	4		6	15971	8137.56	814.75			8	25102	1372.69	880.167
4	4063	1366.4	815.667	4		6	15972	1688.86	655.619			8	25103	1532.4	863.289
4	4075	2209.35	1064.7	4		6	15973	1369.39	659.667			8	25104	8452.29	1119
4	4078	1089.71	988.235	4		6	15975	1352.65	673.059			8	25105	1234.43	817.364
4	4079	1448.71	1148.29	4		6	15978	1732.89	853.611			8	25106	1345.43	849.455
4	4080	3571.94	741	4		6	15979	1542.5	840.438			8	25107	1256.83	861.396
4	4081	1808	631.059	4		6	15980	1358.38	1009			8	25108	1097.25	796.396
4	4082	1662	673.375	4		6	15981	42889.1	4507.45			8	25110	1470.28	768.739
4	4083	1037.71	654.471	4		6	15982	2171.94	956.611			8	25111	1306.48	825.048
4	4085	1421.68	672.526	4		6	15983	1776.29	869.706			8	25113	1395.59	753.109
4	4087	1195.5	698.429	4		6	15984	1012.64	802.273			8	25114	1023.51	821.047
4	4088	1395	675.389	4		6	15985	1516.17	711.833			8	25115	1047.33	764.326
4	4089	1446.88	845.313	4		6	15986	24525.4	1227.38			8	25116	1066.67	744.109
4	4090	1343.5	738.333	4		6	15987	35492.5	1393.17			8	25117	1002.5	784.5
4	4091	1204	965.438	4		6	15988	1284.2	705.867			8	25123	1015.16	748.432
4	4092	8664.13	1315.5	4		6	15989	1381.69	686.875			8	25124	1568.59	770.455
4	4094	1075.13	636.267	4		6	15990	26006.1	1161.47			8	25125	1071.48	793.432
4	4095	4773.33	750	4		6	15991	27372.3	1162.75			8	25126	1953.93	775.907
4	4096	1115.81	741.188	4		6	15992	37456.2	1464.67			8	25127	1220.74	769.69
4	4097	1061.82	704.529	4		6	15993	32266.1	1307.31			8	25128	1552.37	701.86
4	4098	1146.63	762.313	4		6	15994	1183.5	706.125			8	25129	1401	717.977
4	4104	1555.75	593.375	4		6	15995	1321.69	967.25			8	25130	1853.83	716.239
4	4106	1023.75	981.563	4		6	15996	1064.5	777.056			8	25131	1068.28	767.391
4	4108	1218.71	1045.35	4		6	15997	13480.2	1098.65			8	25133	1142.37	697
4	4113	1726.69	1901.63	4		6	15998	1237.1	897.85			8	25136	1300.78	749.667
4	4114	1039.31	1611.75	4		6	15999	13964.3	1038.65			8	25139	2110.09	1107.48
4	4115	1132.94	1113.44	4		6	16000	1240.19	735.313			8	25140	1288.55	685.745
4	4118	1058	1177.44	4		6	16001	1930.88	814.188			8	25145	5876.02	1448.02
4	4120	1047.75	925.9	4		6	16002	1374.13	826.813			8	25146	1299	883.778
4	4121	1051.38	1137.56	4		6	16003	1162.69	688.938			8	25147	1133.94	766.083
4	4122	1045.88	1042.69	4		6	16004	1636.61	790.056			8	25149	2133.98	880.93
4	4123	1754.47	998.533	4		6	16005	1067.53	1021.47			8	25151	1046.58	661.047
4	4124	1523.69	1056.81	4		6	16006	1399.94	772.5
4	4127	1294.17	1247.67	4		6	16007	1198.24	820.235
4	4128	1280.33	1131.2	4		6	16008	1702.17	774.944
4	4129	1022.94	1014.25	4		6	16009	2781	1068.75
4	4131	1516.36	1060.29	4		6	16010	1281.63	796.125
4	4132	1092	1004.61	4		6	16011	1226.65	786.765
4	4135	1116.8	981.733	4		6	16012	1260.22	818.833
4	4136	1445.35	962.118	4		6	16013	1319.75	808.188
4	4137	1170.06	1004.81	4		6	16014	1186.06	814.588
4	4138	1449.94	983.313	4		6	16015	1168.69	823.813
4	4139	1508.94	945.647	4		6	16016	1583.37	711.895
4	4142	1062.56	971.313	4		6	16017	1669.81	713.063
4	4144	1081.35	984.882	4		6	16018	1644.06	718.176
4	4147	1480.18	941.529	4		6	16019	1712.63	750
4	4156	1407.75	1834.5	4		6	16020	1577.35	793.529
4	4157	1087	591.421	4		6	16021	1584	795
4	4158	1261.94	602.125	4		6	16022	1587.29	724
4	4161	2225.93	991.071	4		6	16023	1905.4	756
4	4162	2250.33	1320.78	4		6	16024	54338.5	4147.63
4	4163	1921.56	1220.63	4		6	16025	1257.83	747.5
4	4164	1050	1251.63	4		6	16026	14112.8	1021
4	4167	2237.35	1078.47	4		6	16027	1364.93	795.533
4	4168	2051.12	1063.41	4		6	16028	11908.3	931.889
4	4169	2228.93	1350.2	4		6	16029	1278.22	765.556
4	4171	1004.65	574.882	4		6	16030	1810.72	925.667
4	4172	1161.81	1166.38	4		6	16031	15117.6	1033.56
5	4186	1032.94	805.588	5		6	16032	1460.82	812.176
5	4187	1720.94	932.944	5		6	16033	14403	958.389
5	4188	1888.33	880.389	5		6	16035	1353.56	785.556
5	4195	1176.94	748.875	5		6	16036	1236.05	764.684
5	4217	1567.87	1127.07	5		6	16037	1094.22	723.833
5	4221	1463.8	1067.2	5		6	16038	13087.3	952.765
5	4259	1253.17	814.278	5		6	16039	1428.85	768.75
5	4277	1075.95	919.9	5		6	16040	1137.81	756.625
5	4307	1195.63	1077.75	5		6	16041	1182.41	897.706
5	4311	1240.17	954.444	5		6	16042	49439.7	2424.63
5	4312	1217	969.167	5		6	16043	4095.35	874.176
5	4313	1031.31	951.563	5		6	16044	56136.9	3004
5	4314	1184.12	1008.88	5		6	16045	46473.9	2392.38
5	4315	1164.4	1021.27	5		6	16046	1602.05	700.55
5	4316	1378.5	967	5		6	16047	1292.74	733.421
5	4317	1006.5	962.722	5		6	16048	1144.19	706.625
5	4320	1058.71	954.882	5		6	16049	1175.81	755.375
5	4321	1136.82	908.412	5		6	16050	1433.18	734.647
5	4323	1204.53	938.235	5		6	16051	1230.29	745
5	4328	1328.22	936.389	5		6	16052	3650.6	959.733
5	4333	1658.69	1021.31	5		6	16053	1262.1	783.45
5	4342	1179.79	1026.37	5		6	16054	36364.2	1669.53
5	4348	1000.29	783.882	5		6	16055	37058.1	1712
5	4356	1028.79	991.368	5		6	16056	37240.4	1819.5
5	4361	2214.94	961.188	5		6	16057	1152.94	783.875
5	4372	2289.31	833.75	5		6	16058	1813.82	815.706
5	4379	1566.5	941.063	5		6	16059	1483.9	864.65
5	4383	1333.53	932.632	5		6	16060	1626.87	791.8
5	4391	2214.89	863.556	5		6	16061	1583.5	898.15
5	4395	1596.76	759.824	5		6	16062	1181.58	602.684
5	4399	1026.33	668.267	5		6	16063	1282.57	628.381
5	4417	1024.22	722.889	5		6	16064	1000.63	591.438
5	4428	1552.87	1123.6	5		6	16066	4855.41	679.118
5	4432	1360.38	1056.38	5		6	16067	1525.11	590.167
5	4441	1043.29	950.941	5		6	16068	1462.5	611.5
5	4473	1269.16	965	5		6	16069	1346.56	635.889
6	4476	5047.82	1058.35	6		6	16070	1330	686.529
6	4477	3904.82	921.471	6		6	16071	1124.76	616.647
6	4478	7954.71	1144.43	6		6	16072	1417.56	676
6	4479	4013.43	867.643	6		6	16073	28885.4	2059.18
6	4480	10973.5	1216.59	6		6	16074	22034.4	1478.31
6	4481	9770.56	1227.28	6		6	16075	25542.1	1559.28
6	4482	1408.94	891.875	6		6	16077	11774.7	942.824
6	4483	13814.3	1139.22	6		6	16078	10510.1	977
6	4484	1486.5	971	6		6	16079	11056.4	891.556
6	4485	38193.2	2231.67	6		6	16080	3908.29	877.647
6	4486	38422.5	2512.44	6		6	16081	1003.11	591.056
6	4487	38260.7	2523.65	6		6	16082	1302.06	636.176
6	4488	2161.05	992.474	6		6	16083	1152.47	550.412
6	4489	1695.25	925.438	6		6	16085	1487.56	629.611
6	4490	1557.36	1042	6		6	16086	1463.18	711.765
6	4491	45960.7	2944.61	6		6	16087	6499.28	856.889
6	4492	30687.7	2559.06	6		6	16088	1149.42	514.917
6	4493	3939.72	1114.83	6		6	16089	1285.69	752.313
6	4494	42035.2	2925.73	6		6	16090	2228.24	655.765
6	4495	27472.6	2532.31	6		6	16091	1386.9	671.05
6	4496	1941.45	988.05	6		6	16092	42360.1	2650.2
6	4497	2273.88	1035.88	6		6	16093	43761.7	2617
6	4498	3376.47	886.353	6		6	16094	1770.69	667
6	4499	3831.31	905.313	6		6	16095	1618.94	660
6	4500	2082.47	819.267	6		6	16097	1657.41	722.529
6	4501	2209.39	839.278	6		6	16098	32701.8	2463.24
6	4502	2856.13	820.533	6		6	16099	2349.06	782
6	4503	1377.75	756	6		6	16100	2297.83	877.5
6	4504	1531.38	860.5	6		6	16101	4072.67	872.571
6	4505	4899.4	882.333	6		6	16103	2070.31	875.813
6	4506	4714.44	878.722	6		6	16104	1717.12	869.882
6	4507	5240.94	1100.69	6		6	16105	11335	911.556
6	4508	1621.33	797.4	6		6	16106	8424	781.211
6	4509	1714.5	812.75	6		6	16107	1688.39	757.889
6	4510	1978.83	803.111	6		6	16109	8039.27	751.533
6	4511	1801.59	787.529	6		6	16110	2048.56	682.375
6	4512	1737	848.625	6		6	16111	1503.06	639.059
6	4513	47348.1	3620.13	6		6	16112	1087.38	576.563
6	4514	1431.81	811.688	6		6	16113	5072.5	802.111
6	4515	1542.11	812.722	6		6	16114	1944.45	808.8
6	4516	1922.53	831.733	6		6	16115	3754.12	806.941
6	4517	2017.07	876.933	6		6	16116	10030.8	842.063
6	4518	1918.93	1129.6	6		6	16117	8737.81	827.438
6	4519	1558.33	944.467	6		6	16119	8151.71	796.765
6	4520	1498.18	860.059	6		6	16120	1799.71	651.882
6	4521	1397.88	872.706	6		6	16121	1164.63	687.75
6	4522	2705.5	959.5	6		6	16122	3676.58	878.632
6	4523	2498	1133.22	6		6	16123	1463.25	750.125
6	4524	1503	837.267	6		6	16124	8803	844.333
6	4525	2613.18	1032	6		6	16125	2059	734.905
6	4526	2166.69	1067.88	6		6	16126	9585.3	935.25
6	4527	1582.06	894	6		6	16127	1225.88	723.063
6	4528	1556.71	927.882	6		6	16128	1908.4	659.533
6	4529	3429.24	1180.71	6		6	16129	1586.31	748.813
6	4530	1678.11	957.722	6		6	16130	3263.67	813.111
6	4531	4743.5	1023.11	6		6	16131	1705.75	746.125
6	4532	1666.44	728.313	6		6	16132	1597.06	795.412
6	4533	39773	2777.75	6		6	16133	2508.06	732.353
6	4534	1654.64	764.429	6		6	16134	2621.14	746.238
6	4535	2593.29	739.176	6		6	16135	3663.44	877.889
6	4536	1852.88	825	6		6	16136	4435.79	868.5
6	4537	3201.06	1038.89	6		6	16137	1951.75	862.85
6	4538	1696.87	847.267	6		6	16138	1855.63	830.895
6	4539	16832.4	1154.93	6		6	16139	4370.47	839.421
6	4540	1603.06	883.625	6		6	16140	1150.88	632.294
6	4541	15653.9	1042.13	6		6	16142	1585.4	646.3
6	4542	1590.5	938.857	6		6	16143	1303.56	639.875
6	4543	1697.24	831.412	6		6	16144	2242.94	750
6	4544	17354.4	1179	6		6	16145	1557.28	709.944
6	4545	17629.4	1126.69	6		6	16146	1417.27	668.133
6	4546	1719.71	862.059	6		6	16147	1144.22	570.278
6	4547	49406.6	3791.72	6		6	16148	1624.78	704.333
6	4548	54280.4	4718.71	6		6	16149	1001.59	543.353
6	4549	53510.4	4894.13	6		6	16151	1418	713.125
6	4550	45236.1	4375.21	6		6	16152	1750.75	712.813
6	4551	2420.65	870.471	6		6	16153	1206.5	724.944
6	4552	1368.38	852.688	6		6	16154	12821.9	844.789
6	4553	2529.06	976.167	6		6	16155	1389.44	672.833
6	4554	1435.63	898	6		6	16156	1557.17	594.444
6	4555	2049.06	836.563	6		6	16157	1120.12	712.471
6	4556	1398.25	898.563	6		6	16158	12035.1	868.706
6	4557	2245.56	881.813	6		6	16159	1198.56	646.938
6	4558	1678.87	824.067	6		6	16161	1165.69	726.625
6	4559	2228.5	1079.11	6		6	16162	12820.2	927.409
6	4560	1682.89	720.167	6		6	16163	2509.48	744.952
6	4561	2424.29	803.824	6		6	16164	1072.67	686.333
6	4562	2153.06	1113.19	6		6	16165	1765.4	646.75
6	4563	3958.94	1117.44	6		6	16166	1368.95	733.053
6	4564	2274.56	690.625	6		6	16167	1052.2	490.8
6	4565	2007.63	665	6		6	16168	2103.4	893.75
6	4566	2375.69	710.688	6		6	16169	1475.94	799.294
6	4567	1854.44	695.313	6		6	16170	46238.6	1605.19
6	4568	2032.57	668	6		6	16171	44466.6	1590
6	4569	3518.75	755.125	6		6	16172	38200.6	1426.95
6	4570	2284.12	815	6		6	16173	2719.76	917.588
6	4571	1501.27	646.2	6		6	16174	2275.72	891.556
6	4572	1738.63	767.263	6		6	16175	2788.21	996.842
6	4573	1519.74	708.263	6		6	16176	2569.63	940.75
6	4574	26151.7	2650	6		6	16177	1956.06	920.278
6	4575	25698	2359.44	6		6	16178	1878.2	892.45
6	4576	33069.4	3759.25	6		6	16179	44006.1	2011.05
6	4577	30430.5	3562.81	6		6	16180	2280.12	865.353
6	4578	15339.5	1250.53	6		6	16183	8503.82	1091.59
6	4579	4838.75	1076.81	6		6	16184	1380	908.579
6	4580	52126.4	5779.29	6		6	16185	7086.18	1024.53
6	4581	37791.4	4577.27	6		6	16186	3486.63	833.875
6	4582	1663.44	775	6		6	16187	3165.25	845.563
6	4583	11922.5	1151.75	6		6	16188	2799.44	818.75
6	4584	14700.2	1251.38	6		6	16189	3094.24	840.059
6	4585	13197.6	1107.29	6		6	16190	3166.25	820.313
6	4586	4719.83	910.5	6		6	16191	3176.33	850.2
6	4587	4091.19	1195.13	6		6	16192	3022.44	839.75
6	4588	1908.5	758.875	6		6	16193	2922.76	801.824
6	4589	1779.5	894.722	6		6	16194	4342	1059.67
6	4590	6833.06	973.563	6		6	16195	1399.06	826.824
6	4591	3795.56	820.438	6		6	16196	1345.71	750.786
6	4592	2166.58	902.053	6		6	16197	1221.06	965.813
6	4593	16110.7	1143.93	6		6	16198	2855.26	1271.68
6	4594	12139.6	932.375	6		6	16199	1542.24	1185.76
6	4595	3238.6	805.333	6		6	16200	29406.5	2170.89
6	4596	4272.35	920.059	6		6	16201	45444.3	2691.35
6	4597	13664.3	1263.33	6		6	16202	47537.6	2746.88
6	4598	7202.25	995.875	6		6	16203	54661	2470.18
6	4599	8807.71	960	6		6	16204	45075.6	2054.5
6	4600	10502	942.412	6		6	16205	43339.3	1921.38
6	4601	13799.1	1078.13	6		6	16206	2949.13	1371.56
6	4602	3521.72	900.056	6		6	16208	1124.33	910.889
6	4603	3182.63	868.5	6		6	16209	1013.65	904.824
6	4604	2217.47	832.533	6		6	16210	1055.88	947.813
6	4605	3514	1004.44	6		6	16211	3744.94	857.389
6	4606	3173.87	910.067	6		6	16212	2921.87	847.667
6	4607	4676.87	1588.67	6		6	16213	1462.19	810.125
6	4608	3327.5	816.25	6		6	16214	1470.73	827.2
6	4609	2208.25	929	6		6	16215	1522.27	786.867
6	4610	4353.71	860.929	6		6	16216	1507.25	1009.5
6	4611	5446.56	925.222	6		6	16217	1896.85	1005.7
6	4612	2642.71	1089.43	6		6	16218	1167.5	942.875
6	4613	1139.88	677	6		6	16219	1496.38	812
6	4614	1613	740.75	6		6	16220	1558.69	893.625
6	4615	1495.88	757.688	6		6	16221	28000.5	1416.87
6	4616	1252.63	762.063	6		6	16222	27940.8	1457.13
6	4617	1663.78	733.278	6		6	16223	25016.1	1226.94
6	4618	2535.22	831.611	6		6	16224	25128.4	1317
6	4619	1252.65	764.824	6		6	16225	1292.72	962.722
6	4620	9500.11	923.158	6		6	16226	1214.12	912.118
6	4621	1972.73	776.2	6		6	16227	1221.38	882
6	4622	12898.9	940.667	6		6	16228	1300.87	908.4
6	4623	9830.13	913.667	6		6	16229	1416.78	961.889
6	4624	1379.53	785.118	6		6	16230	1660.6	833.933
6	4625	13980.8	987.813	6		6	16231	1134.5	912.375
6	4626	13893.2	1027.67	6		6	16232	1000.88	840.235
6	4627	14318.9	995	6		6	16233	1041	838.188
6	4628	12642.8	981.176	6		6	16241	1123.4	996.6
6	4629	1251.33	790.571	6		6	16243	1131.24	945.765
6	4630	2384.83	806.278	6		6	16246	1101.22	854.333
6	4631	2200.88	841.875	6		6	16247	1083.94	693.222
6	4632	1181.88	689.063	6		6	16251	2295.11	749.333
6	4633	2424.12	735.882	6		6	16252	2748.24	771.882
6	4634	1094.5	656.125	6		6	16255	1133	873.313
6	4635	1223.13	709.5	6		6	16256	1149.56	896.813
6	4636	4116.44	761.875	6		6	16257	1038.2	825.467
6	4637	2702.35	780.647	6		6	16258	1034.38	875
6	4638	2158.11	811.167	6		6	16260	1117.17	794.611
6	4639	2355.41	664.588	6		6	16264	1011.75	646.688
6	4640	2037.31	692.313	6		6	16265	52217.9	2373.06
6	4641	1299.24	566.059	6		6	16266	49392.6	2413.82
6	4642	2656.63	622	6		6	16267	51617.5	2593.75
6	4643	1510.88	658.588	6		6	16268	52583.9	2791.18
6	4644	3347.84	671.316	6		6	16269	1925.89	715.889
6	4645	1238.5	693.333	6		6	16270	1147.63	791.563
6	4646	2919.38	665.688	6		6	16271	1284.33	832.762
6	4647	3133.75	797.188	6		6	16272	2219.65	807.176
6	4648	1326.13	722.125	6		6	16273	2168.44	818.688
6	4649	4798.95	769.45	6		6	16274	2328.67	775.5
6	4650	4396.72	860	6		6	16275	1362.28	791.167
6	4651	3569.82	669.412	6		6	16276	1642.67	796
6	4652	1856.63	719.188	6		6	16277	26867.8	1708.95
6	4653	3044.57	726.095	6		6	16278	45808.7	2180.63
6	4654	4846.47	834.133	6		6	16279	36274.4	1854.32
6	4655	7890.65	830.471	6		6	16280	30451.1	1837.19
6	4656	7756.06	979.625	6		6	16281	1022.93	765.467
6	4657	1379.59	577.765	6		6	16282	1271.28	778.833
6	4658	2043.44	595.889	6		6	16283	1485.71	1069.29
6	4659	1436.29	568.294	6		6	16284	2002.81	881.938
6	4660	11132.8	908.6	6		6	16286	2256.71	806
6	4661	2504.5	720.938	6		6	16287	2181.5	779.778
6	4662	11284.8	923.875	6		6	16288	2147.65	824.529
6	4663	2051.19	733.188	6		6	16289	1105.88	807
6	4664	6749.67	763.867	6		6	16290	1114.2	855.133
6	4665	5779.79	747.842	6		6	16291	1118	812.438
6	4666	2457.78	706.889	6		6	16292	1039.31	820.188
6	4667	2800.56	732.75	6		6	16293	1003.17	783.111
6	4668	1550.19	786	6		6	16294	1140.4	870.867
6	4669	1643.12	762.353	6		6	16295	1843.93	955.933
6	4670	3050.33	786.111	6		6	16296	1015.71	807.353
6	4671	1878	834.706	6		6	16297	1796.75	880.35
6	4672	1711.53	805.667	6		6	16298	1857.67	895.833
6	4673	1667.37	616.632	6		6	16299	1541.93	856.867
6	4674	1632.35	587.176	6		6	16300	1738.94	942.5
6	4675	5405.89	679.111	6		6	16301	1344.65	782.85
6	4676	2332.2	638.85	6		6	16302	1716.89	937.111
6	4677	1374.86	566.5	6		6	16303	1056.18	846.529
6	4678	1836.5	758.722	6		6	16304	1713.18	869.706
6	4679	3023.5	677.5	6		6	16306	1122.88	735.938
6	4680	2076.65	610.294	6		6	16307	1149.4	901.267
6	4681	2014.31	675.25	6		6	16308	1256.6	740.2
6	4682	1942.63	677	6		6	16309	1137.33	1087.33
6	4683	1552.63	600.75	6		6	16310	1127.76	801.529
6	4684	10224.9	870.733	6		6	16313	1348.69	864.938
6	4685	12484.5	960.563	6		6	16315	1317	798.611
6	4686	1520.94	733.188	6		6	16316	1127.37	758.158
6	4687	2433.93	674.733	6		6	16317	1038	1045.5
6	4688	7650.64	933.857	6		6	16318	1051.07	799.133
6	4689	3095.79	745.5	6		6	16319	1135.31	778.688
6	4690	1844.13	703.75	6		6	16320	1058	757.133
6	4691	1468.36	681.5	6		6	16321	1114.63	1061.31
6	4692	4166.47	684.118	6		6	16322	3622.44	911.333
6	4693	1430.53	622.421	6		6	16323	1105.87	805.933
6	4694	1971.56	742.625	6		6	16329	1430.74	660.158
6	4695	1467.31	616	6		6	16330	1762.44	642.722
6	4696	1241.67	677.867	6		6	16331	1172.56	643.313
6	4697	2157.44	636.389	6		6	16332	1074.94	618.938
6	4698	2226.35	720.824	6		6	16333	7818.69	814.875
6	4699	2286.13	661.188	6		6	16334	12800.1	877.313
6	4700	1748.39	657.167	6		6	16335	7526.89	823.944
6	4701	2049.4	709.6	6		6	16336	10357.1	865.813
6	4702	1370	593.438	6		6	16337	11350.5	855.176
6	4703	1771.88	618.75	6		6	16338	1455.5	650
6	4704	1243.5	774.875	6		6	16339	3699.67	835.095
6	4705	1568.47	619	6		6	16340	1569.14	1311.14
6	4706	1308.33	633.389	6		6	16342	1922.06	619.25
6	4707	2312.11	664.944	6		6	16343	2412.13	760.25
6	4708	2393.6	703.067	6		6	16344	1642.67	606.278
6	4709	2603.22	861.222	6		6	16346	1789.75	669.125
6	4710	2494.31	922.875	6		6	16347	1069.06	702.389
6	4711	3320.64	936.5	6		6	16348	1080.6	614
6	4712	3079.81	995.875	6		6	16349	1157.85	627.1
6	4713	3415.53	961.941	6		6	16350	4385.3	788.7
6	4714	2378.56	893.438	6		6	16352	1062.94	616.813
6	4715	3587.44	880.938	6		6	16354	3785.44	867.25
6	4716	3956.67	978	6		6	16355	1055.06	602.063
6	4717	2125.44	1053.94	6		6	16358	1470.35	706
6	4718	3183.41	873.882	6		6	16360	1505.44	719.611
6	4719	4297.13	898.688	6		6	16361	1984.95	751.81
6	4720	3979.36	930.929	6		6	16363	1226.31	683.25
6	4721	4218.29	908.706	6		6	16364	1161.93	788.267
6	4722	3760	919.588	6		6	16365	4736.13	819.375
6	4723	5213.71	979.588	6		6	16368	1039.33	650.444
6	4724	2454.88	1096.59	6		6	16370	1156.7	623.65
6	4725	6031.78	977.944	6		6	16371	1288.31	708.563
6	4726	4833.06	991	6		6	16372	1083.1	743.333
6	4727	1837.53	832.8	6		6	16374	1080.75	759.25
6	4728	2933.41	1127.24	6		6	16375	1145	793.25
6	4729	5815.27	1011.53	6		6	16376	1035	1148.88
6	4730	6440.11	1066.33	6		6	16377	3116.67	827.389
6	4731	2302.56	832.188	6		6	16378	1126.88	922.588
6	4732	1716	837.313	6		6	16379	26276.7	1453.25
6	4733	2590.5	1067	6		6	16380	1004	983.938
6	4734	1932.72	1091.67	6		6	16381	29226.3	1503.56
6	4735	5709.13	1009.94	6		6	16382	29848.4	1367.75
6	4736	2666.19	840.375	6		6	16383	29615.6	1403.5
6	4737	7197.5	1147.31	6		6	16384	31608.4	1434.56
6	4738	8531.31	1114.38	6		6	16385	28092.5	1407.88
6	4739	8569.76	1095.65	6		6	16386	1105.11	952.263
6	4740	2867.63	865.5	6		6	16388	1123.9	945.381
6	4741	2598.06	1031.24	6		6	16389	1054.43	861.857
6	4742	1482.94	1176.44	6		6	16390	11181.6	1003.69
6	4743	2982.35	1089.88	6		6	16391	1163.06	879.063
6	4744	51457.9	4441.94	6		6	16392	10915.9	929.471
6	4745	8215.59	1085.24	6		6	16393	9869.17	1084.5
6	4746	6314.4	1134.2	6		6	16394	1746.53	796.533
6	4747	6246.56	1016.17	6		6	16395	1817.4	767.9
6	4748	6010.76	895.412	6		6	16396	1827.37	808.474
6	4749	3114	935.125	6		6	16397	1885.88	982.313
6	4750	2842.87	867.333	6		6	16398	1572.45	951.6
6	4751	2074.13	1076	6		6	16399	27199.9	1430.63
6	4752	1476.18	1054.06	6		6	16400	27938.4	1431
6	4753	1539.56	1121.44	6		6	16401	1083.69	893.813
6	4754	35431.5	3732.6	6		6	16402	10339.9	1032.56
6	4755	42572.8	4295	6		6	16403	10800	1012.63
6	4756	53545.5	4504.23	6		6	16404	1146.29	867.214
6	4757	3692.59	932.412	6		6	16405	10516	1027.81
6	4758	1802.88	925.188	6		6	16406	11930.4	1065.31
6	4759	1643.39	1160.78	6		6	16407	10905.5	1018.39
6	4760	1786.64	988.214	6		6	16408	11231.8	1008.28
6	4761	51153.2	3641.2	6		6	16409	11090.2	980.625
6	4762	3116.12	1450.35	6		6	16410	9625.19	933.813
6	4763	7525.25	1092.63	6		6	16411	1724.39	778.111
6	4764	3349.65	930.941	6		6	16412	1940.84	815.789
6	4765	3520.73	882	6		6	16414	2226.69	855.5
6	4766	3182.41	926.706	6		6	16415	1002.13	894.467
6	4767	2957.84	844.158	6		6	16417	2392.76	895.235
6	4768	6164.06	1539.5	6		6	16418	2098.93	813.867
6	4769	1671.13	988.875	6		6	16419	2840.9	883.05
6	4770	1444.06	1345.88	6		6	16420	1961.59	880.471
6	4771	2156.12	1318.76	6		6	16421	2092.76	907.412
6	4772	30385.4	1776	6		6	16422	8285.44	1023.72
6	4773	1954	871.333	6		6	16423	4897.94	1488.56
6	4774	2095.47	829.471	6		6	16426	2232.29	902.765
6	4775	2380.07	878.067	6		6	16427	1017.93	931.067
6	4776	2302.4	838.667	6		6	16429	1162.63	886.75
6	4777	2891.53	877.737	6		6	16430	1492.2	950.933
6	4778	2080.47	863.412	6		6	16431	1280.84	876.474
6	4779	3736.47	881	6		6	16432	1245.5	877.75
6	4780	2313.13	837.5	6		6	16433	1205.44	802.688
6	4781	2017.06	834.353	6		6	16435	1942	898.235
6	4782	2214.38	868.375	6		6	16438	1382.26	976.913
6	4783	2153.25	809.25	6		6	16439	1002.38	944.5
6	4784	3185.72	830	6		6	16441	1110.75	1013.19
6	4785	2193	853.438	6		6	16445	1871.18	735.235
6	4786	2389.53	837.176	6		6	16446	1093.74	878.737
6	4787	3106.75	936.375	6		6	16448	1046.06	949.389
6	4788	2229.19	869.563	6		6	16454	1067.33	636
6	4789	19034.9	1267.43	6		6	16455	1066.72	676.111
6	4790	14717.8	1196.71	6		6	16456	1195.7	682.1
6	4791	16725.2	1215.18	6		6	16460	1158.32	750
6	4792	14253.2	1198.38	6		6	16462	1079.67	689.667
6	4793	14451.4	1273.5	6		6	16463	1176.56	703.444
6	4794	15754.4	1196.56	6		6	16464	1181.31	664.938
6	4795	13388.2	1175.33	6		6	16465	1410.47	679.118
6	4796	2089.67	937.833	6		6	16466	1350.06	811.118
6	4797	3023.44	892.167	6		6	16467	1411.63	712.188
6	4798	47267.8	2059.25	6		6	16468	7072.17	934.833
6	4799	45244.6	1942.25	6		6	16472	1313.12	687.529
6	4800	2332.2	1008.27	6		6	16475	1049.67	748.333
6	4801	2487.63	1040.56	6		6	16476	1122	921.118
6	4802	2236.47	1032.07	6		6	16477	1120.93	837.667
6	4803	2218.44	974.188	6		6	16478	3182.56	818.111
6	4804	2193.56	1024.13	6		6	16479	1007.94	885.941
6	4805	2982.41	1020.47	6		6	16480	1010.89	758.368
6	4806	3961	1430.8	6		6	16481	1234.15	784.2
6	4807	1230.56	1224.56	6		6	16482	1035.88	800.5
6	4808	1483.39	1104.78	6		6	16486	1069.56	757.5
6	4809	1437.27	1106.67	6		6	16488	1445.3	843.45
6	4810	1882.56	817.188	6		6	16489	1430.69	748.438
6	4811	3755	918	6		6	16490	1928.5	1090.11
6	4812	10869.7	1027.06	6		6	16491	1171.07	769.6
6	4813	4568.82	1247.29	6		6	16492	1079.58	805.947
6	4814	9051	989.944	6		6	16493	5957.4	946.667
6	4815	13166.5	1064.82	6		6	16494	1657.88	741.25
6	4816	9943.83	1042.67	6		6	16495	1550.8	810.2
6	4817	8971.56	1002.44	6		6	16496	1956.29	1050.21
6	4818	10625.2	1071.31	6		6	16497	1020.06	736.167
6	4819	46042	5047.71	6		6	16498	1186	738.588
6	4820	19788.6	1241.13	6		6	16499	3418.06	737.813
6	4821	32228.9	1351.72	6		6	16500	4075.38	749.625
6	4822	1965.36	965.929	6		6	16501	1054.67	702.208
6	4823	26850.9	1535	6		6	16502	1261.27	661.4
6	4824	28351.3	1519.5	6		6	16503	1107.76	729.529
6	4825	1830.44	1162.38	6		6	16504	1220.75	680.188
6	4826	1358.67	1096.62	6		6	16505	1260.63	607.875
6	4827	2776.71	1050	6		6	16507	4126.25	722.875
6	4828	1208.69	1014.31	6		6	16508	1185.78	710.944
6	4829	1325.62	720.667	6		6	16510	2303.78	696.944
6	4830	1478.63	689.947	6		6	16511	1309.69	550.438
6	4831	2151.38	720.688	6		6	16512	2030.56	744.667
6	4832	2001.27	792.067	6		6	16513	1261	769.882
6	4833	1324.33	818.8	6		6	16516	1199.12	679.235
6	4834	1232.63	672.563	6		6	16517	3442.94	773.875
6	4835	1875.56	806.5	6		6	16518	1091.68	672.684
6	4836	1986	733.588	6		6	16519	1421.31	652.125
6	4837	1949.19	737.75	6		6	16520	1252.94	650.278
6	4838	2659.44	751.813	6		6	16521	1071.56	1030
6	4839	1979.94	674	6		6	16522	3011.13	694
6	4840	1360.13	830.063	6		6	16523	2700.56	748.313
6	4841	1192.93	922.533	6		6	16525	2192.94	727.824
6	4842	3863.61	917.778	6		6	16527	1258.06	731.353
6	4843	1034.8	829.3	6		6	16528	1187.31	708.875
6	4844	1193.63	699.563	6		6	16529	1684	741.375
6	4845	1422.29	683.118	6		6	16530	1211.55	707.3
6	4846	2087.53	961.941	6		6	16531	1277.56	659.438
6	4847	2303	1119.29	6		6	16532	1080.25	660.5
6	4848	1925.56	978.625	6		6	16533	1124.12	676.235
6	4849	2055.63	1128.13	6		6	16537	2079	641.813
6	4850	1209.44	777.938	6		6	16538	1060.44	570.5
6	4851	1136.41	763.882	6		6	16540	2600	932.526
6	4852	1226.64	805.5	6		6	16543	1732.2	653.4
6	4853	1365.17	1100.44	6		6	16544	1922.25	635.2
6	4854	1526.44	1139	6		6	16545	1538.82	680.529
6	4855	2100.79	1085.29	6		6	16546	1962	626.375
6	4856	1215.94	874.75	6		6	16547	4110.22	1081.06
6	4857	1093.25	819.063	6		6	16548	2307.59	820.353
6	4858	1188.35	822.176	6		6	16549	1416.28	694.278
6	4860	5365.28	1115.39	6		6	16550	1124.94	710.813
6	4861	3949.18	1010.82	6		6	16551	1121.24	718.706
6	4862	3288.06	855.625	6		6	16552	1718.27	845.733
6	4863	2681.88	904.875	6		6	16553	1458.84	770.211
6	4864	2893.28	869.444	6		6	16554	9168.05	1139.53
6	4865	3283.82	923.471	6		6	16555	3224.58	1208.37
6	4866	2456.56	934.5	6		6	16556	1211.19	927.938
6	4867	2418.19	836.813	6		6	16558	1265.94	900.313
6	4868	1268.93	963.267	6		6	16561	1096.94	868.333
6	4869	1378	954.294	6		6	16563	1379.06	824.125
6	4870	1211.31	855.313	6		6	16564	1690.17	803.444
6	4871	1520.35	984.059	6		6	16565	6826.31	1013.56
6	4872	1307.27	803.867	6		6	16566	7179.6	906.867
6	4873	2218.93	1029.87	6		6	16567	6806.38	984.438
6	4874	3086.06	867.25	6		6	16568	1186.81	870.375
6	4876	2595.6	850.333	6		6	16569	31735.3	3198.22
6	4877	2796.82	836.412	6		6	16570	47507.1	1547.07
6	4878	1041.2	937.533	6		6	16571	41606.3	1617.72
6	4879	2222.22	1200.17	6		6	16572	48520.2	1599.53
6	4880	2318.38	826.75	6		6	16573	1574.29	882.824
6	4882	5612.13	1145.81	6		6	16574	1941.67	847.944
6	4883	3808.2	1043.93	6		6	16575	1341.31	860.063
6	4884	3603.63	998.625	6		6	16576	1441.47	906.6
6	4885	4137.56	1025.72	6		6	16577	3006.61	1073.33
6	4886	2266	847.944	6		6	16578	6049.14	929.952
6	4887	2206.07	784.929	6		6	16579	6512.89	951.667
6	4888	3558.18	941.941	6		6	16580	6308.06	1105.65
6	4889	2550	810.625	6		6	16581	6088.76	1002.88
6	4890	1366.5	806.95	6		6	16582	46100.9	3463.56
6	4891	1636.57	698.929	6		6	16583	50700	1682.05
6	4892	1534.07	678.733	6		6	16584	43727.9	1615.6
6	4893	3625.18	859.118	6		6	16585	47796.9	1704.63
6	4894	1428.41	706.529	6		6	16586	5448.94	926.438
6	4895	1263.28	670.722	6		6	16587	4957.18	931.647
6	4896	1663.94	1127.56	6		6	16588	1236.38	766.438
6	4897	3722.12	936.882	6		6	16589	1510.18	782.882
6	4898	4031.38	824.313	6		6	16590	2490	884.476
6	4899	1566.69	654.438	6		6	16591	1178.88	754.75
6	4900	3548.94	765.706	6		6	16592	5501.63	962.313
6	4901	3261.88	771.063	6		6	16593	2494.35	861.588
6	4902	4841.13	872	6		6	16594	2671.05	928
6	4903	2882	721	6		6	16595	52970.1	4064.63
6	4904	2872.18	745.824	6		6	16596	55805.2	4723.78
6	4905	2068.5	688.944	6		6	16597	54858.3	4473.5
6	4906	2764.11	715.5	6		6	16598	51905.5	1754.32
6	4907	1958.41	763.824	6		6	16599	5736.11	883.056
6	4908	2620.21	738.357	6		6	16600	6197.56	906.667
6	4909	2436.13	1012.27	6		6	16601	4779.2	868
6	4910	2168.56	848.5	6		6	16602	1037.11	1008.22
6	4911	2773.06	1079.12	6		6	16603	1189.68	784.636
6	4912	2315.88	903.125	6		6	16607	1199.11	678.684
6	4913	1898.47	700	6		6	16608	1263.88	774.625
6	4914	2022.19	681.25	6		6	16609	1185.21	703.421
6	4915	1849.93	642.214	6		6	16610	1346	757.889
6	4916	2203.44	710	6		6	16613	1109.33	777.444
6	4917	2811.94	1059.38	6		6	16615	1637.18	676.941
6	4918	3445.22	1183.89	6		6	16617	1208.41	738.412
6	4919	2444.31	955.563	6		6	16618	1148.19	706.688
6	4920	2134.67	928.944	6		6	16619	1197.81	767.313
6	4921	2560.56	1002.5	6		6	16623	1393.27	799.667
6	4922	2596.5	1017.19	6		6	16628	1024.29	716.118
6	4923	2146.56	960.25	6		6	16629	1209.94	755.833
6	4924	2232.25	888.25	6		6	16630	1098.12	836.941
6	4925	1260.94	649.5	6		6	16631	1357.18	806.706
6	4926	1389.13	593.067	6		6	16632	1553.24	796.882
6	4927	1597.65	843.294	6		6	16634	1742.78	833.611
6	4928	1360.38	654.063	6		6	16635	1386.27	785.867
6	4929	1685.59	709.529	6		6	16636	4730.38	887.25
6	4930	1829.47	704.412	6		6	16638	2180.26	818
6	4931	1605.65	727.353	6		6	16639	6632.13	997
6	4932	2380.25	761.875	6		6	16640	1445.19	712.125
6	4933	2145.35	635.647	6		6	16641	1188.88	734.375
6	4934	2367.76	749.706	6		6	16642	1661.56	799.75
6	4935	1595.75	631.938	6		6	16643	1464.67	792.389
6	4936	2161.94	684.75	6		6	16644	1179.18	605.765
6	4937	2094.8	1017	6		6	16645	1863.44	644.813
6	4938	1449.28	1176.56	6		6	16646	2226.69	724.063
6	4939	28561.5	1698.87	6		6	16647	2334.78	810.722
6	4940	32255.5	1754.13	6		6	16648	1356.73	675.133
6	4941	36637.3	1949.81	6		6	16649	2038.67	812.933
6	4942	33571.4	1812.82	6		6	16650	1086.06	654.529
6	4943	27323.5	1547	6		6	16651	2239.67	666.833
6	4944	2143.22	986.278	6		6	16652	2102.17	671.389
6	4945	27687.6	1441.87	6		6	16653	1243	623.188
6	4946	34377.1	2129.44	6		6	16655	1999.88	749.938
6	4947	29505.3	1727.72	6		6	16656	1912.63	764.368
6	4948	12970.5	1116.06	6		6	16657	2203.06	790.176
6	4949	2712.07	1047.57	6		6	16658	1840.62	770.714
6	4950	28653.9	1686.26	6		6	16659	1519.39	641.056
6	4951	27975.7	1663.19	6		6	16660	1798.31	778.813
6	4952	11670.9	1169.64	6		6	16661	1676.88	715.188
6	4953	12145.9	1175.71	6		6	16662	1498.5	626.5
6	4954	1135.17	915.167	6		6	16663	2167.06	843.313
6	4955	13026.1	1110.41	6		6	16664	1458.5	812.313
6	4956	11630.1	1162.19	6		6	16665	1365.06	815
6	4957	11706.7	1164.07	6		6	16666	1519.81	818.875
6	4958	11796.3	1034.88	6		6	16667	3091.35	858.9
6	4959	12952.3	1109.56	6		6	16668	4788.47	884.235
6	4960	7175.06	1933	6		6	16669	2021.24	846.765
6	4961	6004.95	1523.5	6		6	16670	6192.25	912.25
6	4962	2481.65	981.118	6		6	16671	1759.31	816.938
6	4963	2654.74	978.053	6		6	16672	1976.95	853.714
6	4964	11323.6	1065.79	6		6	16673	1343.76	826.176
6	4965	1401.47	1121.73	6		6	16674	3174.4	946.4
6	4966	10411.1	1347.24	6		6	16675	4822.59	864.412
6	4967	8935.44	1248.31	6		6	16676	2862.47	868.294
6	4968	4638.69	1037.13	6		6	16677	4797.47	885.684
6	4969	1217.07	914.133	6		6	16678	2115	874.813
6	4970	1386.81	999.375	6		6	16679	2063.41	823.529
6	4971	1320.25	874.125	6		6	16680	9601.69	2062.19
6	4972	1286.2	1151.6	6		6	16681	6409.94	977.941
6	4973	7372.06	1161.94	6		6	16682	2552.15	859.75
6	4974	3821.89	1070.22	6		6	16683	1644	805.059
6	4975	2833.33	1320.53	6		6	16684	2765.94	882.471
6	4976	1229.5	1024.69	6		6	16685	2342.87	858.6
6	4977	2518.3	1154.7	6		6	16686	1754.25	831.563
6	4978	7277.29	1068.35	6		6	16688	1087.63	673.313
6	4979	1413.56	917.444	6		6	16689	4079.94	792.5
6	4980	4148.88	1044.63	6		6	16690	1371.59	840.647
6	4981	2975.71	972.765	6		6	16691	2154.13	809.313
6	4982	1354.53	1029.67	6		6	16695	1585.88	831.375
6	4983	1303.55	993.05	6		6	16696	1414.19	940.75
6	4984	5664.4	994.933	6		6	16697	1625.17	816.778
6	4985	5698.2	1084	6		6	16700	2125.61	994.833
6	4986	5323.07	1109.14	6		6	16701	3161.06	778.188
6	4987	2526.53	936.105	6		6	16703	1403.5	858.688
6	4988	2063.41	881.118	6		6	16704	1299.44	810.063
6	4989	35352.8	5354.18	6		7	16705	4204.15	779.2
6	4990	3075.81	1053.06	6		7	16706	3433.63	810.438
6	4991	3002.88	1033.75	6		7	16707	1409.06	821.313
6	4992	3303.53	1138.47	6		7	16708	3978.82	792.706
6	4993	5152.06	1050.44	6		7	16709	4346.94	759.563
6	4994	5215.71	1003.35	6		7	16711	1020	717.176
6	4995	2957.5	992.357	6		7	16714	1121.9	486.1
6	4996	2402.07	940.867	6		7	16715	1081.06	618.938
6	4997	50962.8	5862.69	6		7	16720	3749.63	727.813
6	4998	56981.6	7771.94	6		7	16721	1202.22	518.833
6	4999	2748	971.143	6		7	16722	1438.5	698.5
6	5000	4537.75	935	6		7	16723	1058.05	571.842
6	5001	4653.06	995.059	6		7	16724	1040.67	546.8
6	5002	55668.3	7138.94	6		7	16727	8087.06	908.563
6	5003	2883.59	1097.76	6		7	16728	1205.13	579.25
6	5004	3085.06	907.875	6		7	16729	1032.35	630.45
6	5005	2556.13	969.25	6		7	16731	1009.63	662.579
6	5006	2953.72	1023.56	6		7	16733	1106.55	518.818
6	5007	2979.5	989.167	6		7	16734	3830.13	606.938
6	5008	2148	852.222	6		7	16735	1024.88	578.375
6	5009	53117.4	6949.61	6		7	16736	1175.8	646.933
6	5010	2461.94	967.471	6		7	16737	31742	2397.68
6	5011	4068.22	964.278	6		7	16738	24597.6	1855.44
6	5012	4007.88	985.063	6		7	16739	24576.5	1950.05
6	5013	2028.31	919.875	6		7	16740	3203.35	795
6	5014	2173.33	862.611	6		7	16741	1026.44	783.875
6	5015	54386.1	9981.29	6		7	16742	2533.39	929.778
6	5016	2515.35	948.15	6		7	16743	3963.94	813.688
6	5017	3778.65	935.412	6		7	16744	1033.13	745.313
6	5018	9363.84	2981.47	6		7	16745	1074.67	760.889
6	5019	3297.13	963.125	6		7	16746	3521.06	1014.61
6	5020	1316.93	1035.29	6		7	16748	2294.38	825.75
6	5021	1697.38	1012.75	6		7	16749	2095.61	798.667
6	5022	1218.56	990.611	6		7	16750	1781.25	841
6	5023	1459.41	1018.06	6		7	16751	1186.44	857.278
6	5024	1334.47	950.706	6		7	16752	8925.28	1317.78
6	5025	2344.72	941.333	6		7	16753	4855.21	897.895
6	5026	2388.27	955.467	6		7	16754	2321.7	897.7
6	5027	1740.5	877.25	6		7	16755	1864.19	783.938
6	5028	1119.19	1030.06	6		7	16756	2804.32	911.158
6	5029	2384.47	1120.47	6		7	16757	6141	910.133
6	5030	1581.16	965.211	6		7	16758	2736.44	832.375
6	5031	2945.53	990.059	6		7	16759	2529.85	794.15
6	5032	1292.56	915.625	6		7	16760	1220.22	804.278
6	5033	52299.9	2066.47	6		7	16761	1304.73	743
6	5034	51966.7	2037.31	6		7	16762	1261.59	740.647
6	5035	2375.94	951.833	6		7	16763	14003.1	1019.39
6	5036	1136.11	1155.06	6		7	16764	14639.9	1026.75
6	5037	48601	1829.42	6		7	16765	11346.4	952.563
6	5038	43712.5	1840	6		7	16766	11772.4	968.278
6	5039	2349.65	897.882	6		7	16767	12753.3	998.688
6	5040	2020.73	870.733	6		7	16768	12635.9	1009.88
6	5041	2003.65	932.529	6		7	16769	2383.06	973.941
6	5042	1762.06	960.333	6		7	16770	6845.88	974.063
6	5043	9435.72	1172.39	6		7	16772	1026.29	898.647
6	5044	1189.72	857.5	6		7	16774	6318.75	888.938
6	5045	1727.8	856.133	6		7	16775	2904.62	868.048
6	5046	1753.56	891.25	6		7	16776	1332.06	828.889
6	5047	1283.94	879.333	6		7	16778	8867.89	875.579
6	5048	7037.5	1003.88	6		7	16779	7064.75	860
6	5049	6078.19	943.938	6		7	16780	6703.94	836.75
6	5050	5356.56	986.556	6		7	16781	1722.5	626.55
6	5051	1527.69	803.375	6		7	16782	9565	905.278
6	5052	1673	772.733	6		7	16783	9137.83	889.389
6	5053	1644.29	721.765	6		7	16785	9424.31	919.813
6	5054	1964.39	786.389	6		7	16786	8137.56	814.75
6	5055	4522.19	940.063	6		7	16787	1688.86	655.619
6	5056	3474.81	899	6		7	16788	1369.39	659.667
6	5057	4024.81	964.063	6		7	16790	1352.65	673.059
6	5058	1261.06	817.278	6		7	16793	1732.89	853.611
6	5059	1128.75	894.813	6		7	16794	1542.5	840.438
6	5060	1246.38	889.063	6		7	16795	1358.38	1009
6	5061	2616.47	1192.24	6		7	16796	42889.1	4507.45
6	5062	2719.06	903.706	6		7	16797	2171.94	956.611
6	5063	3255.47	834.6	6		7	16798	1776.29	869.706
6	5064	1220.78	863.167	6		7	16799	1012.64	802.273
6	5065	2735.24	866.235	6		7	16800	1516.17	711.833
6	5066	1948.12	1005.12	6		7	16801	24525.4	1227.38
6	5067	2693.94	824.824	6		7	16802	35492.5	1393.17
6	5068	2416.13	903.75	6		7	16803	1284.2	705.867
6	5069	2383.11	812.389	6		7	16804	1381.69	686.875
6	5070	2257.27	781	6		7	16805	26006.1	1161.47
6	5071	1840.28	800.611	6		7	16806	27372.3	1162.75
6	5072	1772.25	810.563	6		7	16807	37456.2	1464.67
6	5073	1808.94	775.333	6		7	16808	32266.1	1307.31
6	5074	2027.73	882.867	6		7	16809	1183.5	706.125
6	5075	2246.39	822.333	6		7	16810	1321.69	967.25
6	5076	2262.75	834.938	6		7	16811	1064.5	777.056
6	5077	2254.44	810.688	6		7	16812	13480.2	1098.65
6	5078	2466.14	864.429	6		7	16813	1237.1	897.85
6	5079	6233.86	1016.57	6		7	16814	13964.3	1038.65
6	5080	6211.89	957	6		7	16815	1240.19	735.313
6	5081	5256.38	982.125	6		7	16816	1930.88	814.188
6	5082	6653.63	974.842	6		7	16817	1374.13	826.813
6	5083	7472.21	1104.36	6		7	16818	1162.69	688.938
6	5084	1859.5	1069.57	6		7	16819	1636.61	790.056
6	5085	1903	939.867	6		7	16820	1067.53	1021.47
6	5086	1690.76	892.235	6		7	16821	1399.94	772.5
6	5087	1068.62	930.952	6		7	16822	1198.24	820.235
6	5088	1459.44	716.313	6		7	16823	1702.17	774.944
6	5089	1494.86	837.714	6		7	16824	2781	1068.75
6	5090	2774.44	716.167	6		7	16825	1281.63	796.125
6	5091	2549.57	851.643	6		7	16826	1226.65	786.765
6	5092	1874.06	789.111	6		7	16827	1260.22	818.833
6	5093	1154.18	600.294	6		7	16828	1319.75	808.188
6	5094	3659.72	886.056	6		7	16829	1186.06	814.588
6	5095	1147.06	589.25	6		7	16830	1168.69	823.813
6	5097	2571.19	886.25	6		7	16831	1583.37	711.895
6	5098	2300.13	838	6		7	16832	1669.81	713.063
6	5099	2276.88	862.941	6		7	16833	1644.06	718.176
6	5100	3111.56	863.778	6		7	16834	1712.63	750
6	5101	2590.13	907.133	6		7	16835	1577.35	793.529
6	5102	2987.38	874.5	6		7	16836	1584	795
6	5103	5438.63	1843.06	6		7	16837	1587.29	724
6	5104	2825.14	926.286	6		7	16838	1905.4	756
6	5105	1378.63	1074.63	6		7	16839	54338.5	4147.63
6	5106	1779.19	839.75	6		7	16840	1257.83	747.5
7	5112	2815.5	1339.88	7		7	16841	14112.8	1021
7	5121	1865.89	1162.89	7		7	16842	1364.93	795.533
7	5122	2399.63	1118.5	7		7	16843	11908.3	931.889
7	5151	1032.1	1026.85	7		7	16844	1278.22	765.556
7	5173	2555.94	1504.12	7		7	16845	1810.72	925.667
7	5180	2047.59	807.529	7		7	16846	15117.6	1033.56
7	5188	1165.89	799.556	7		7	16847	1460.82	812.176
7	5198	1082.89	900.111	7		7	16848	14403	958.389
7	5238	1035.13	1005.69	7		7	16850	1353.56	785.556
7	5242	2054.39	1081.11	7		7	16851	1236.05	764.684
7	5250	1147.32	1585.47	7		7	16852	1094.22	723.833
7	5257	2360.94	1598.33	7		7	16853	13087.3	952.765
7	5264	1109.6	1553.53	7		7	16854	1428.85	768.75
7	5267	2605.42	1515.16	7		7	16855	1137.81	756.625
7	5287	1134.95	1401.8	7		7	16856	1182.41	897.706
7	5313	1344.68	1231.42	7		7	16857	49439.7	2424.63
8	5336	1254.13	849.625	8		7	16858	4095.35	874.176
8	5337	1159.79	751.143	8		7	16859	56136.9	3004
8	5338	1036	842.786	8		7	16860	46473.9	2392.38
8	5339	1364.5	792.125	8		7	16861	1602.05	700.55
8	5340	1028.14	843.643	8		7	16862	1292.74	733.421
8	5341	1099.11	769.556	8		7	16863	1144.19	706.625
8	5342	1047.21	768	8		7	16864	1175.81	755.375
8	5343	1383.27	797.4	8		7	16865	1433.18	734.647
8	5344	1167.81	826.938	8		7	16866	1230.29	745
8	5345	2109.76	720.118	8		7	16867	3650.6	959.733
8	5346	3237.94	724.471	8		7	16868	1262.1	783.45
8	5347	2891.43	766.786	8		7	16869	36364.2	1669.53
8	5348	1114.13	755.667	8		7	16870	37058.1	1712
8	5349	1207	742.533	8		7	16871	37240.4	1819.5
8	5350	4021.53	756.8	8		7	16872	1152.94	783.875
8	5351	1484	736.647	8		7	16873	1813.82	815.706
8	5352	2553.5	676	8		7	16874	1483.9	864.65
8	5353	1474.81	738.625	8		7	16875	1626.87	791.8
8	5354	2702.81	710.938	8		7	16876	1583.5	898.15
8	5355	1735.81	686.381	8		7	16877	1181.58	602.684
8	5356	2639.65	770.941	8		7	16878	1282.57	628.381
8	5357	6471.72	922.611	8		7	16879	1000.63	591.438
8	5358	5764	869.941	8		7	16881	4855.41	679.118
8	5359	2088.94	720.444	8		7	16882	1525.11	590.167
8	5360	2063.42	763.368	8		7	16883	1462.5	611.5
8	5361	1975.88	792.625	8		7	16884	1346.56	635.889
8	5362	1971.6	752.8	8		7	16885	1330	686.529
8	5363	2652.89	764.722	8		7	16886	1124.76	616.647
8	5364	1151.35	736.412	8		7	16887	1417.56	676
8	5365	2032.19	741.313	8		7	16888	28885.4	2059.18
8	5366	1230.44	750.833	8		7	16889	22034.4	1478.31
8	5367	11070.2	1048.32	8		7	16890	25542.1	1559.28
8	5368	3203.06	833.118	8		7	16892	11774.7	942.824
8	5369	7228.43	970.714	8		7	16893	10510.1	977
8	5370	1162.31	736.188	8		7	16894	11056.4	891.556
8	5371	1358.75	748.063	8		7	16895	3908.29	877.647
8	5372	1388.94	783.063	8		7	16896	1003.11	591.056
8	5373	8599.75	983.188	8		7	16897	1302.06	636.176
8	5374	1363.38	752.5	8		7	16898	1152.47	550.412
8	5375	3192.63	916.688	8		7	16900	1487.56	629.611
8	5376	3420	914.6	8		7	16901	1463.18	711.765
8	5377	18171.9	1128.94	8		7	16902	6499.28	856.889
8	5378	3097.81	840.063	8		7	16903	1149.42	514.917
8	5379	2749.75	837.75	8		7	16904	1285.69	752.313
8	5380	2876.14	797.286	8		7	16905	2228.24	655.765
8	5381	14385	1155.93	8		7	16906	1386.9	671.05
8	5382	3476.25	922.938	8		7	16907	42360.1	2650.2
8	5383	24497.1	1422.53	8		7	16908	43761.7	2617
8	5384	22501.4	1249.32	8		7	16909	1770.69	667
8	5385	7312.35	965.588	8		7	16910	1618.94	660
8	5386	7893.88	949.588	8		7	16912	1657.41	722.529
8	5387	8861.06	1013.25	8		7	16913	32701.8	2463.24
8	5388	2890.56	886.625	8		7	16914	2349.06	782
8	5389	4882.58	926.895	8		7	16915	2297.83	877.5
8	5390	3365.81	991.063	8		7	16916	4072.67	872.571
8	5391	20020.6	1251.94	8		7	16918	2070.31	875.813
8	5392	2905.29	911.929	8		7	16919	1717.12	869.882
8	5393	25197.8	1284.69	8		7	16920	11335	911.556
8	5394	10071.4	1039.39	8		7	16921	8424	781.211
8	5395	7959.93	1000.87	8		7	16922	1688.39	757.889
8	5396	5696.19	1010.44	8		7	16924	8039.27	751.533
8	5397	1066.5	807.313	8		7	16925	2048.56	682.375
8	5398	3170.44	710.313	8		7	16926	1503.06	639.059
8	5399	1814.2	719.6	8		7	16927	1087.38	576.563
8	5400	1568.2	747.267	8		7	16928	5072.5	802.111
8	5401	1984.07	656.867	8		7	16929	1944.45	808.8
8	5402	4083.33	750.944	8		7	16930	3754.12	806.941
8	5404	5039.12	787.647	8		7	16931	10030.8	842.063
8	5405	2167.61	714.722	8		7	16932	8737.81	827.438
8	5406	3106.35	684.471	8		7	16934	8151.71	796.765
8	5407	1252.29	661.765	8		7	16935	1799.71	651.882
8	5408	1053.64	700.571	8		7	16936	1164.63	687.75
8	5409	8603.75	1192.81	8		7	16937	3676.58	878.632
8	5410	3929.88	814.563	8		7	16938	1463.25	750.125
8	5411	2462.47	715.765	8		7	16939	8803	844.333
8	5412	2171.95	747.632	8		7	16940	2059	734.905
8	5413	2793.47	807.4	8		7	16941	9585.3	935.25
8	5414	2845.19	772.5	8		7	16942	1225.88	723.063
8	5415	2718.88	788.313	8		7	16943	1908.4	659.533
8	5416	1803.24	706.235	8		7	16944	1586.31	748.813
8	5417	6327.94	937.333	8		7	16945	3263.67	813.111
8	5418	3135.78	808.889	8		7	16946	1705.75	746.125
8	5419	1621.47	735.412	8		7	16947	1597.06	795.412
8	5420	3355.5	788.444	8		7	16948	2508.06	732.353
8	5421	3292.25	791.75	8		7	16949	2621.14	746.238
8	5422	6709.87	879.533	8		7	16950	3663.44	877.889
8	5423	32076.2	2782.06	8		7	16951	4435.79	868.5
8	5424	2008.94	770.625	8		7	16952	1951.75	862.85
8	5425	21111.9	1356.67	8		7	16953	1855.63	830.895
8	5426	53451.1	3577.31	8		7	16954	4370.47	839.421
8	5427	3832.11	805	8		7	16955	1150.88	632.294
8	5428	34248.2	2915.8	8		7	16957	1585.4	646.3
8	5429	29469.4	2516.44	8		7	16958	1303.56	639.875
8	5430	8169.35	1059.29	8		7	16959	2242.94	750
8	5431	7725.13	1031.69	8		7	16960	1557.28	709.944
8	5432	2803.18	857.353	8		7	16961	1417.27	668.133
8	5433	1449.19	803	8		7	16962	1144.22	570.278
8	5434	1063.73	680.667	8		7	16963	1624.78	704.333
8	5435	14693.2	1076.33	8		7	16964	1001.59	543.353
8	5436	7949.73	984.267	8		7	16966	1418	713.125
8	5437	1460.94	849.75	8		7	16967	1750.75	712.813
8	5438	1204.59	592.706	8		7	16968	1206.5	724.944
8	5440	1359.2	583.333	8		7	16969	12821.9	844.789
8	5441	1060.94	602.722	8		7	16970	1389.44	672.833
8	5442	1205	583.875	8		7	16971	1557.17	594.444
8	5443	1008.06	647.353	8		7	16972	1120.12	712.471
8	5445	1093.25	651.375	8		7	16973	12035.1	868.706
8	5446	1478.25	630.813	8		7	16974	1198.56	646.938
8	5447	1171.41	631.529	8		7	16976	1165.69	726.625
8	5449	1069.87	589	8		7	16977	12820.2	927.409
8	5450	1380.67	637.6	8		7	16978	2509.48	744.952
8	5451	1075.25	685.313	8		7	16979	1072.67	686.333
8	5452	1854.47	653.467	8		7	16980	1765.4	646.75
8	5453	1546.88	664.313	8		7	16981	1368.95	733.053
8	5454	1466.39	638.944	8		7	16982	1052.2	490.8
8	5456	1040.31	717.875	8		7	16983	2103.4	893.75
8	5457	1430.69	664.125	8		7	16984	1475.94	799.294
8	5458	1645.38	649	8		7	16985	46238.6	1605.19
8	5459	1289	654.625	8		7	16986	44466.6	1590
8	5460	1014.07	534.467	8		7	16987	38200.6	1426.95
8	5461	1840.12	727.176	8		7	16988	2719.76	917.588
8	5462	1449.63	766.813	8		7	16989	2275.72	891.556
8	5463	1950.94	597.471	8		7	16990	2788.21	996.842
8	5464	2423.44	648.438	8		7	16991	2569.63	940.75
8	5465	1258.15	552.6	8		7	16992	1956.06	920.278
8	5466	1037.89	570.211	8		7	16993	1878.2	892.45
8	5467	1358.65	726.294	8		7	16994	44006.1	2011.05
8	5468	2849.67	698.667	8		7	16995	2280.12	865.353
8	5469	2866.19	707.813	8		7	16998	8503.82	1091.59
8	5470	3427.44	729.563	8		7	16999	1380	908.579
8	5471	3104.39	691.278	8		7	17000	7086.18	1024.53
8	5472	3992.13	713.813	8		7	17001	3486.63	833.875
8	5473	2842.71	662	8		7	17002	3165.25	845.563
8	5474	4034.39	691.556	8		7	17003	2799.44	818.75
8	5475	1089.24	763.412	8		7	17004	3094.24	840.059
8	5476	3235.94	684	8		7	17005	3166.25	820.313
8	5477	2922.6	688.4	8		7	17006	3176.33	850.2
8	5478	1529.5	904.063	8		7	17007	3022.44	839.75
8	5479	1493.11	914.444	8		7	17008	2922.76	801.824
8	5480	1652.44	916.875	8		7	17009	4342	1059.67
8	5481	1593.56	900.556	8		7	17010	1399.06	826.824
8	5482	1663.94	962.938	8		7	17011	1345.71	750.786
8	5483	1573.33	926.533	8		7	17012	1221.06	965.813
8	5484	1880.88	955.176	8		7	17013	2855.26	1271.68
8	5485	1959.22	934.389	8		7	17014	1542.24	1185.76
8	5486	1516.65	931	8		7	17015	29406.5	2170.89
8	5487	1838.88	958.235	8		7	17016	45444.3	2691.35
8	5488	2022.12	929.353	8		7	17017	47537.6	2746.88
8	5489	2305.88	1029.88	8		7	17018	54661	2470.18
8	5490	2190.06	1008.82	8		7	17019	45075.6	2054.5
8	5491	1896.25	909.625	8		7	17020	43339.3	1921.38
8	5492	1294.61	985.444	8		7	17021	2949.13	1371.56
8	5493	1176.38	918.313	8		7	17023	1124.33	910.889
8	5494	1222.93	885	8		7	17024	1013.65	904.824
8	5495	1756.88	920.75	8		7	17025	1055.88	947.813
8	5496	1831.13	923.438	8		7	17026	3744.94	857.389
8	5497	2835.83	1087.89	8		7	17027	2921.87	847.667
8	5498	2403.24	969.706	8		7	17028	1462.19	810.125
8	5499	1228.81	815.063	8		7	17029	1470.73	827.2
8	5500	1292.75	929.5	8		7	17030	1522.27	786.867
8	5501	1115.73	916.333	8		7	17031	1507.25	1009.5
8	5502	1668.59	1079.82	8		7	17032	1896.85	1005.7
8	5503	1322.25	1074.69	8		7	17033	1167.5	942.875
8	5504	1061.65	889.471	8		7	17034	1496.38	812
8	5505	2220.33	1044.89	8		7	17035	1558.69	893.625
8	5506	1026.67	867.222	8		7	17036	28000.5	1416.87
8	5507	1142.4	838.467	8		7	17037	27940.8	1457.13
8	5508	1311.69	920.438	8		7	17038	25016.1	1226.94
8	5509	1544.88	882.25	8		7	17039	25128.4	1317
8	5510	1549.56	863	8		7	17040	1292.72	962.722
8	5511	1107.5	940.167	8		7	17041	1214.12	912.118
8	5512	2006.83	1071.5	8		7	17042	1221.38	882
8	5513	1153.31	1119.88	8		7	17043	1300.87	908.4
8	5515	1177.75	853.938	8		7	17044	1416.78	961.889
8	5516	1117.81	980.625	8		7	17045	1660.6	833.933
8	5518	1824.55	946.15	8		7	17046	1134.5	912.375
8	5520	1102.72	978.556	8		7	17047	1000.88	840.235
8	5521	1458.07	994.5	8		7	17048	1041	838.188
8	5522	1043.33	807.167	8		7	17056	1123.4	996.6
8	5526	1148.25	836.813	8		7	17058	1131.24	945.765
8	5527	1123.29	826.471	8		7	17061	1101.22	854.333
8	5528	1437.19	902.188	8		7	17062	1083.94	693.222
8	5529	1083	949.125	8		7	17066	2295.11	749.333
8	5530	2645.44	884.611	8		7	17067	2748.24	771.882
8	5531	2772.19	852.438	8		7	17070	1133	873.313
8	5532	2926.67	954.133	8		7	17071	1149.56	896.813
8	5533	3135.31	877.688	8		7	17072	1038.2	825.467
8	5534	1889.59	859.765	8		7	17073	1034.38	875
8	5535	1374.69	919	8		7	17075	1117.17	794.611
8	5536	2058.63	878.313	8		7	17079	1011.75	646.688
8	5537	3910.72	1050.22	8		7	17080	52217.9	2373.06
8	5538	1524.94	1146.06	8		7	17081	49392.6	2413.82
8	5539	1134	855.938	8		7	17082	51617.5	2593.75
8	5540	1625.06	862.056	8		7	17083	52583.9	2791.18
8	5541	4119.06	1075.81	8		7	17084	1925.89	715.889
8	5542	2617.76	876.588	8		7	17085	1147.63	791.563
8	5543	1264.24	1048.76	8		7	17086	1284.33	832.762
8	5545	1370.33	865.111	8		7	17087	2219.65	807.176
8	5546	1358.61	805.611	8		7	17088	2168.44	818.688
8	5547	1264.93	906.867	8		7	17089	2328.67	775.5
8	5548	1604.53	856.824	8		7	17090	1362.28	791.167
8	5549	1316.75	818.5	8		7	17091	1642.67	796
8	5550	1857.56	939.625	8		7	17092	26867.8	1708.95
8	5551	2077.53	995.533	8		7	17093	45808.7	2180.63
8	5552	1715.19	923.688	8		7	17094	36274.4	1854.32
8	5553	1401.94	945.75	8		7	17095	30451.1	1837.19
8	5554	1431.69	1142.81	8		7	17096	1022.93	765.467
8	5555	1340.31	956.25	8		7	17097	1271.28	778.833
8	5556	1256.87	950.067	8		7	17098	1485.71	1069.29
8	5557	3098.88	1038.12	8		7	17099	2002.81	881.938
8	5558	2953.36	1077.21	8		7	17101	2256.71	806
8	5559	1722.82	780.059	8		7	17102	2181.5	779.778
8	5560	1008	1013.67	8		7	17103	2147.65	824.529
8	5561	1386.63	905.313	8		7	17104	1105.88	807
8	5562	2141	961.786	8		7	17105	1114.2	855.133
8	5563	5100.43	1267.36	8		7	17106	1118	812.438
8	5564	2369.21	902	8		7	17107	1039.31	820.188
8	5565	1413.29	1055.5	8		7	17108	1003.17	783.111
8	5566	1469.88	991.875	8		7	17109	1140.4	870.867
8	5567	1464.39	985.667	8		7	17110	1843.93	955.933
8	5568	1324.81	743.625	8		7	17111	1015.71	807.353
8	5569	1215.41	814.176	8		7	17112	1796.75	880.35
8	5570	1353.33	905.533	8		7	17113	1857.67	895.833
8	5571	1105.75	1050.25	8		7	17114	1541.93	856.867
8	5572	1119.33	821.667	8		7	17115	1738.94	942.5
8	5574	11796.4	1412.63	8		7	17116	1344.65	782.85
8	5575	1417.47	861.235	8		7	17117	1716.89	937.111
8	5576	25331.7	1540.93	8		7	17118	1056.18	846.529
8	5577	21629.6	1227.44	8		7	17119	1713.18	869.706
8	5578	20785.6	1286.19	8		7	17121	1122.88	735.938
8	5579	3347.88	960.412	8		7	17122	1149.4	901.267
8	5580	5579.61	1046.83	8		7	17123	1256.6	740.2
8	5581	1558.63	1128.19	8		7	17124	1137.33	1087.33
8	5582	1669.56	888.313	8		7	17125	1127.76	801.529
8	5584	3835.67	946.067	8		7	17128	1348.69	864.938
8	5585	5065.56	912.125	8		7	17130	1317	798.611
8	5586	4807.25	947.375	8		7	17131	1127.37	758.158
8	5587	1432.69	870.563	8		7	17132	1038	1045.5
8	5588	1037.33	912.444	8		7	17133	1051.07	799.133
8	5589	1539.13	846.625	8		7	17134	1135.31	778.688
8	5590	1463.58	892.632	8		7	17135	1058	757.133
8	5591	1319.75	853.875	8		7	17136	1114.63	1061.31
8	5592	1740.8	869.4	8		7	17137	3622.44	911.333
8	5593	4137.27	977.333	8		7	17138	1105.87	805.933
8	5594	1305.25	786.125	8		7	17144	1430.74	660.158
8	5595	1997.76	942.588	8		7	17145	1762.44	642.722
8	5596	1012.8	893.267	8		7	17146	1172.56	643.313
8	5597	1486.31	858.438	8		7	17147	1074.94	618.938
8	5598	1402.31	788.688	8		7	17148	7818.69	814.875
8	5599	1206.69	905.125	8		7	17149	12800.1	877.313
8	5600	7166.31	927.438	8		7	17150	7526.89	823.944
8	5601	1207.31	834.625	8		7	17151	10357.1	865.813
8	5602	2294.56	810.778	8		7	17152	11350.5	855.176
8	5603	1948.2	951.4	8		7	17153	1455.5	650
8	5604	1773.69	950.375	8		7	17154	3699.67	835.095
8	5605	1899.24	885.412	8		7	17155	1569.14	1311.14
8	5607	1396.47	777.789	8		7	17157	1922.06	619.25
8	5608	2303.19	773.625	8		7	17158	2412.13	760.25
8	5609	11187.1	1027.67	8		7	17159	1642.67	606.278
8	5610	1517.56	873.125	8		7	17161	1789.75	669.125
8	5611	10628.9	951.438	8		7	17162	1069.06	702.389
8	5612	1305.13	859.813	8		7	17163	1080.6	614
8	5613	1156.82	839.882	8		7	17164	1157.85	627.1
8	5614	7365.72	984.167	8		7	17165	4385.3	788.7
8	5615	1841.25	802.625	8		7	17167	1062.94	616.813
8	5616	1291.83	863.667	8		7	17169	3785.44	867.25
8	5617	1178.76	825.353	8		7	17170	1055.06	602.063
8	5618	1103.67	899.6	8		7	17173	1470.35	706
8	5619	4205.39	856.556	8		7	17175	1505.44	719.611
8	5620	2016.93	748.214	8		7	17176	1984.95	751.81
8	5621	1804.71	776.176	8		7	17178	1226.31	683.25
8	5622	1816.89	783	8		7	17179	1161.93	788.267
8	5623	1458.67	775.6	8		7	17180	4736.13	819.375
8	5624	1301	737.706	8		7	17183	1039.33	650.444
8	5625	3327	803.857	8		7	17185	1156.7	623.65
8	5626	1473.12	738	8		7	17186	1288.31	708.563
8	5627	5024.94	806.438	8		7	17187	1083.1	743.333
8	5628	2246.87	766.8	8		7	17189	1080.75	759.25
8	5629	1038.19	759.438	8		7	17190	1145	793.25
8	5630	1096.79	848.786	8		7	17191	1035	1148.88
8	5631	4671.13	879.333	8		7	17192	3116.67	827.389
8	5632	1274.93	763.267	8		7	17193	1126.88	922.588
8	5633	1061.31	760.75	8		7	17194	26276.7	1453.25
8	5634	3813.06	753.313	8		7	17195	1004	983.938
8	5635	2365.05	858.429	8		7	17196	29226.3	1503.56
8	5636	3370.41	791.529	8		7	17197	29848.4	1367.75
8	5637	1786.44	761.056	8		7	17198	29615.6	1403.5
8	5638	3131.53	803.733	8		7	17199	31608.4	1434.56
8	5639	1969.56	771.667	8		7	17200	28092.5	1407.88
8	5640	1846.88	714.875	8		7	17201	1105.11	952.263
8	5641	2560.8	777	8		7	17203	1123.9	945.381
8	5642	3024.76	801.706	8		7	17204	1054.43	861.857
8	5643	1265	647.706	8		7	17205	11181.6	1003.69
8	5644	1178.13	671.688	8		7	17206	1163.06	879.063
8	5645	7493.79	978.947	8		7	17207	10915.9	929.471
8	5646	6296.95	879.158	8		7	17208	9869.17	1084.5
8	5647	1183.57	926.286	8		7	17209	1746.53	796.533
8	5648	7566.56	908.188	8		7	17210	1817.4	767.9
8	5649	1321.5	752.625	8		7	17211	1827.37	808.474
8	5650	1154	876.059	8		7	17212	1885.88	982.313
8	5651	1853.25	776.313	8		7	17213	1572.45	951.6
8	5652	1035.61	676	8		7	17214	27199.9	1430.63
8	5653	1491.44	731.222	8		7	17215	27938.4	1431
8	5654	1965.88	855.765	8		7	17216	1083.69	893.813
8	5656	2308.32	656.105	8		7	17217	10339.9	1032.56
8	5657	1296.06	752.765	8		7	17218	10800	1012.63
8	5658	1528.5	716.875	8		7	17219	1146.29	867.214
8	5659	2914.29	867.588	8		7	17220	10516	1027.81
8	5660	1789.27	736.667	8		7	17221	11930.4	1065.31
8	5661	1199.5	781	8		7	17222	10905.5	1018.39
8	5663	1064.73	745.333	8		7	17223	11231.8	1008.28
8	5664	1116.78	779.167	8		7	17224	11090.2	980.625
8	5666	22319.4	1349.36	8		7	17225	9625.19	933.813
8	5667	1538.81	638	8		7	17226	1724.39	778.111
8	5668	2209.82	699.412	8		7	17227	1940.84	815.789
8	5669	2412.76	758.765	8		7	17229	2226.69	855.5
8	5670	3931.94	746.412	8		7	17230	1002.13	894.467
8	5671	6676.56	1267.06	8		7	17232	2392.76	895.235
8	5672	1172.88	642.5	8		7	17233	2098.93	813.867
8	5673	6485.11	1116.83	8		7	17234	2840.9	883.05
8	5674	1540.31	712.813	8		7	17235	1961.59	880.471
8	5675	3549.59	709.588	8		7	17236	2092.76	907.412
8	5676	1164.2	752.75	8		7	17237	8285.44	1023.72
8	5677	3128.71	737.235	8		7	17238	4897.94	1488.56
8	5678	3523.2	773.933	8		7	17241	2232.29	902.765
8	5679	1485.35	679.824	8		7	17242	1017.93	931.067
8	5680	3746.38	938.25	8		7	17244	1162.63	886.75
8	5681	2648.86	668	8		7	17245	1492.2	950.933
8	5682	4484	1020.65	8		7	17246	1280.84	876.474
8	5683	1074.31	724.438	8		7	17247	1245.5	877.75
8	5684	4673.86	981.786	8		7	17248	1205.44	802.688
8	5685	1455.5	673.75	8		7	17250	1942	898.235
8	5686	2851.53	825.8	8		7	17253	1382.26	976.913
8	5687	2848.53	957.706	8		7	17254	1002.38	944.5
8	5688	2731.94	693.5	8		7	17256	1110.75	1013.19
8	5689	1521.63	679.375	8		7	17260	1871.18	735.235
8	5690	3142.89	891.579	8		7	17261	1093.74	878.737
8	5691	2071.14	708	8		7	17263	1046.06	949.389
8	5692	2562.13	883.8	8		7	17269	1067.33	636
8	5693	2547.07	722.867	8		7	17270	1066.72	676.111
8	5694	2424.35	885.706	8		7	17271	1195.7	682.1
8	5695	4253.28	741.444	8		7	17275	1158.32	750
8	5696	4140.79	716.895	8		7	17277	1079.67	689.667
8	5698	1078.88	582.588	8		7	17278	1176.56	703.444
8	5699	2079.07	670.333	8		7	17279	1181.31	664.938
8	5702	1611.94	649.556	8		7	17280	1410.47	679.118
8	5703	1592.88	664.188	8		7	17281	1350.06	811.118
8	5704	7273.22	843.611	8		7	17282	1411.63	712.188
8	5705	1621.39	601.389	8		7	17283	7072.17	934.833
8	5706	1012.06	672.5	8		7	17287	1313.12	687.529
8	5707	1035.07	698.267	8		7	17290	1049.67	748.333
8	5710	1287.18	604.176	8		7	17291	1122	921.118
8	5711	1031.72	726.222	8		7	17292	1120.93	837.667
8	5712	1375.63	647.5	8		7	17293	3182.56	818.111
8	5714	1297.81	633.625	8		7	17294	1007.94	885.941
8	5715	1530.4	616.733	8		7	17295	1010.89	758.368
8	5716	1235.5	658.375	8		7	17296	1234.15	784.2
8	5717	1245.06	656.294	8		7	17297	1035.88	800.5
8	5718	1217.11	621.278	8		7	17301	1069.56	757.5
8	5719	1652.72	674.333	8		7	17303	1445.3	843.45
8	5720	1407.13	730.933	8		7	17304	1430.69	748.438
8	5721	1655.22	932.222	8		7	17305	1928.5	1090.11
8	5722	1296.35	1172.24	8		7	17306	1171.07	769.6
8	5723	1808.88	1186.75	8		7	17307	1079.58	805.947
8	5724	1776.38	922.125	8		7	17308	5957.4	946.667
8	5725	1318.25	1136.31	8		7	17309	1657.88	741.25
8	5726	1376.13	1123.38	8		7	17310	1550.8	810.2
8	5727	1654	963.526	8		7	17311	1956.29	1050.21
8	5728	2103.06	1287.76	8		7	17312	1020.06	736.167
8	5729	1474.86	1255.9	8		7	17313	1186	738.588
8	5730	1332.93	873.867	8		7	17314	3418.06	737.813
8	5731	2085.27	1102.4	8		7	17315	4075.38	749.625
8	5732	1071.59	1224.47	8		7	17316	1054.67	702.208
8	5733	1381.76	1195.41	8		7	17317	1261.27	661.4
8	5734	2073.24	1267.12	8		7	17318	1107.76	729.529
8	5735	2015.81	1557.31	8		7	17319	1220.75	680.188
8	5736	1206.56	916	8		7	17320	1260.63	607.875
8	5737	2767.74	1057.42	8		7	17322	4126.25	722.875
8	5738	2118	1051.6	8		7	17323	1185.78	710.944
8	5739	1800.29	990.529	8		7	17325	2303.78	696.944
8	5740	1480.47	1296.29	8		7	17326	1309.69	550.438
8	5741	1144	953.188	8		7	17327	2030.56	744.667
8	5742	1009.67	1048.94	8		7	17328	1261	769.882
8	5743	2436.53	932.333	8		7	17331	1199.12	679.235
8	5744	3608.94	1035.81	8		7	17332	3442.94	773.875
8	5745	4122.25	1025.19	8		7	17333	1091.68	672.684
8	5746	1253.31	1036.19	8		7	17334	1421.31	652.125
8	5747	2386.2	1028.93	8		7	17335	1252.94	650.278
8	5748	1459.82	1130.88	8		7	17336	1071.56	1030
8	5749	3380.12	991.471	8		7	17337	3011.13	694
8	5750	4257.13	948	8		7	17338	2700.56	748.313
8	5751	1507.13	1249.87	8		7	17340	2192.94	727.824
8	5752	1239.19	902.188	8		7	17342	1258.06	731.353
8	5753	2911.38	948.875	8		7	17343	1187.31	708.875
8	5755	1387.5	1046.56	8		7	17344	1684	741.375
8	5756	1770.58	1308.53	8		7	17345	1211.55	707.3
8	5757	2315.39	953.278	8		7	17346	1277.56	659.438
8	5758	2126.12	930.588	8		7	17347	1080.25	660.5
8	5759	2476.47	954.529	8		7	17348	1124.12	676.235
8	5760	1334.13	989.2	8		7	17352	2079	641.813
8	5761	2338.44	1010.38	8		7	17353	1060.44	570.5
8	5762	2100.72	1005.89	8		7	17355	2600	932.526
8	5763	2489.33	1452.87	8		7	17358	1732.2	653.4
8	5764	1088.76	1069.59	8		7	17359	1922.25	635.2
8	5765	1314.83	1029.06	8		7	17360	1538.82	680.529
8	5766	1258.06	1034.25	8		7	17361	1962	626.375
8	5767	1420.28	1116.56	8		7	17362	4110.22	1081.06
8	5768	4148.33	1426.07	8		7	17363	2307.59	820.353
8	5769	1170.06	911.529	8		7	17364	1416.28	694.278
8	5770	1258.68	991	8		7	17365	1124.94	710.813
8	5771	1322.13	1048	8		7	17366	1121.24	718.706
8	5772	6334.94	1132.25	8		7	17367	1718.27	845.733
8	5773	1575.8	1077.93	8		7	17368	1458.84	770.211
8	5774	6683.47	1620.41	8		7	17369	9168.05	1139.53
8	5775	14778.1	1773.94	8		7	17370	3224.58	1208.37
8	5777	4724.83	1042	8		7	17371	1211.19	927.938
8	5778	1364.43	892.643	8		7	17373	1265.94	900.313
8	5779	1573.29	1062.06	8		7	17376	1096.94	868.333
8	5780	1467.12	897.647	8		7	17378	1379.06	824.125
8	5781	5681.57	1491.29	8		7	17379	1690.17	803.444
8	5782	8358.64	1840.79	8		7	17380	6826.31	1013.56
8	5783	10737.9	2017.5	8		7	17381	7179.6	906.867
8	5784	1378.27	794	8		7	17382	6806.38	984.438
8	5785	1313.13	907.867	8		7	17383	1186.81	870.375
8	5787	1109.13	966.667	8		7	17384	31735.3	3198.22
8	5788	1280.81	963.375	8		7	17385	47507.1	1547.07
8	5789	11468.9	2552.65	8		7	17386	41606.3	1617.72
8	5790	1372.78	1049.83	8		7	17387	48520.2	1599.53
8	5791	1197.5	925.125	8		7	17388	1574.29	882.824
8	5792	1056.82	905.882	8		7	17389	1941.67	847.944
8	5794	1050.28	906.889	8		7	17390	1341.31	860.063
8	5795	1200.19	923.188	8		7	17391	1441.47	906.6
8	5797	1352.17	849.833	8		7	17392	3006.61	1073.33
8	5798	1054.07	916.467	8		7	17393	6049.14	929.952
8	5799	2366.38	1176.63	8		7	17394	6512.89	951.667
8	5800	1500.88	1026.59	8		7	17395	6308.06	1105.65
8	5801	1942.82	970.941	8		7	17396	6088.76	1002.88
8	5802	1233.29	859.118	8		7	17397	46100.9	3463.56
8	5803	1227.76	816.176	8		7	17398	50700	1682.05
8	5804	3874.83	918.056	8		7	17399	43727.9	1615.6
8	5805	1178.88	916.438	8		7	17400	47796.9	1704.63
8	5806	1239.59	916.882	8		7	17401	5448.94	926.438
8	5807	1521.2	895.467	8		7	17402	4957.18	931.647
8	5808	1536.94	961.412	8		7	17403	1236.38	766.438
8	5809	1800.06	1080.29	8		7	17404	1510.18	782.882
8	5810	2274.69	976.5	8		7	17405	2490	884.476
8	5811	1046	843.278	8		7	17406	1178.88	754.75
8	5812	1148.06	1082.25	8		7	17407	5501.63	962.313
8	5813	1157.2	906	8		7	17408	2494.35	861.588
8	5814	5144.44	1065.28	8		7	17409	2671.05	928
8	5815	1122.71	809.706	8		7	17410	52970.1	4064.63
8	5816	3747.83	1120.67	8		7	17411	55805.2	4723.78
8	5817	6278.59	1148	8		7	17412	54858.3	4473.5
8	5818	1166.33	856.222	8		7	17413	51905.5	1754.32
8	5819	1271.47	1006.76	8		7	17414	5736.11	883.056
8	5820	1083.21	866.143	8		7	17415	6197.56	906.667
8	5822	1135.56	786.5	8		7	17416	4779.2	868
8	5823	1019.5	788	8		7	17417	1037.11	1008.22
8	5824	1030.69	921.313	8		7	17418	1189.68	784.636
8	5825	1565.94	891.056	8		7	17422	1199.11	678.684
8	5826	1176.94	876.063	8		7	17423	1263.88	774.625
8	5827	1050.8	825.867	8		7	17424	1185.21	703.421
8	5829	1958.39	870.556	8		7	17425	1346	757.889
8	5830	1381.44	858.125	8		7	17428	1109.33	777.444
8	5831	1064.2	809.733	8		7	17430	1637.18	676.941
8	5832	1874.72	962.556	8		7	17432	1208.41	738.412
8	5833	1783.69	830.188	8		7	17433	1148.19	706.688
8	5834	1009.81	854.063	8		7	17434	1197.81	767.313
8	5835	1877.87	770.4	8		7	17438	1393.27	799.667
8	5837	1210.06	797.529	8		7	17443	1024.29	716.118
8	5838	1046.82	772.471	8		7	17444	1209.94	755.833
8	5839	1056.75	853.188	8		7	17445	1098.12	836.941
8	5840	1157.19	774.938	8		7	17446	1357.18	806.706
8	5843	1104.33	759.722	8		7	17447	1553.24	796.882
8	5844	1057.44	764.125	8		7	17449	1742.78	833.611
8	5845	11516.5	1585.2	8		7	17450	1386.27	785.867
8	5846	1182.41	951.294	8		7	17451	4730.38	887.25
8	5848	1312.25	1018.69	8		7	17453	2180.26	818
8	5849	7311.76	1162.12	8		7	17454	6632.13	997
8	5850	4996.27	1014.33	8		7	17455	1445.19	712.125
8	5851	2955.28	1072.17	8		7	17456	1188.88	734.375
8	5852	1799.84	960.474	8		7	17457	1661.56	799.75
8	5853	1240.31	1052.13	8		7	17458	1464.67	792.389
8	5854	1156.75	966.75	8		7	17459	1179.18	605.765
8	5856	1424.06	946.412	8		7	17460	1863.44	644.813
8	5857	2208	1234.11	8		7	17461	2226.69	724.063
8	5858	5421.53	1469.8	8		7	17462	2334.78	810.722
8	5859	1488.65	1014.18	8		7	17463	1356.73	675.133
8	5860	6684.5	1765	8		7	17464	2038.67	812.933
8	5861	1388.06	887.765	8		7	17465	1086.06	654.529
8	5862	1532.71	963.294	8		7	17466	2239.67	666.833
8	5863	1415.2	959	8		7	17467	2102.17	671.389
8	5864	1172.94	741.235	8		7	17468	1243	623.188
8	5865	1517.56	821.125	8		7	17470	1999.88	749.938
8	5866	1105.6	871.667	8		7	17471	1912.63	764.368
8	5867	1393.06	840.813	8		7	17472	2203.06	790.176
8	5868	1873.71	836.071	8		7	17473	1840.62	770.714
8	5869	1429.29	832.286	8		7	17474	1519.39	641.056
8	5870	1120.5	826.286	8		7	17475	1798.31	778.813
8	5871	1813.33	926.722	8		7	17476	1676.88	715.188
8	5872	1205.71	767.176	8		7	17477	1498.5	626.5
8	5873	1181.69	813.438	8		7	17478	2167.06	843.313
8	5874	1180.06	836.412	8		7	17479	1458.5	812.313
8	5875	1211.43	781.786	8		7	17480	1365.06	815
8	5876	1002.52	790.429	8		7	17481	1519.81	818.875
8	5878	1067.88	812.75	8		7	17482	3091.35	858.9
8	5879	1070.94	806.375	8		7	17483	4788.47	884.235
8	5880	2316.94	804.294	8		7	17484	2021.24	846.765
8	5881	2621.79	901.526	8		7	17485	6192.25	912.25
8	5883	2107.25	817.938	8		7	17486	1759.31	816.938
8	5884	1579.71	802	8		7	17487	1976.95	853.714
8	5885	1932.41	845.706	8		7	17488	1343.76	826.176
8	5886	2278.67	772.111	8		7	17489	3174.4	946.4
8	5887	2079.31	846.75	8		7	17490	4822.59	864.412
8	5888	1483.24	810.588	8		7	17491	2862.47	868.294
8	5889	1975.17	849.667	8		7	17492	4797.47	885.684
8	5890	2885	889.471	8		7	17493	2115	874.813
8	5891	1847	698.875	8		7	17494	2063.41	823.529
8	5892	2159.56	728.688	8		7	17495	9601.69	2062.19
8	5893	2872.31	861.688	8		7	17496	6409.94	977.941
8	5894	2294.69	694.5	8		7	17497	2552.15	859.75
8	5895	1817.81	679.875	8		7	17498	1644	805.059
8	5896	1763.94	823.125	8		7	17499	2765.94	882.471
8	5897	1971.53	866.267	8		7	17500	2342.87	858.6
8	5898	2914.94	843.5	8		7	17501	1754.25	831.563
8	5899	2772.63	879.188	8		7	17503	1087.63	673.313
8	5900	1908.28	699.722	8		7	17504	4079.94	792.5
8	5901	1817.87	847.467	8		7	17505	1371.59	840.647
8	5902	1766	717	8		7	17506	2154.13	809.313
8	5903	2424.38	785.188	8		7	17510	1585.88	831.375
8	5904	1538.76	801.412	8		7	17511	1414.19	940.75
8	5905	1139.75	694.5	8		7	17512	1625.17	816.778
8	5906	1010.53	682.706	8		7	17515	2125.61	994.833
8	5907	1413.06	860.588	8		7	17516	3161.06	778.188
8	5908	1194	960.188	8		7	17518	1403.5	858.688
8	5909	1085.19	771.75	8		7	17519	1299.44	810.063
8	5910	1185.24	926.824	8		8	17521	2858.44	701.563
						8	17522	1736.71	626
						8	17523	1223.5	605.111
						8	17524	3587.88	664.235
						8	17526	1199.11	655.444
						8	17527	11975.9	1061.73
						8	17528	5253.27	739
						8	17529	1183.38	630.813
						8	17530	1307.94	559.188
						8	17531	4411.5	709.938
						8	17532	2695.5	665.188
						8	17533	1585.94	633.059
						8	17534	1194.56	620.875
						8	17535	1060.5	621.5
						8	17536	1407.67	571.278
						8	17537	1236.29	547.429
						8	17538	1790.78	604.833
						8	17539	1891.53	645.133
						8	17540	3651.71	742.765
						8	17541	1348.53	705.059
						8	17542	4542.83	696.056
						8	17543	2005.06	615.313
						8	17544	1744.75	577.375
						8	17545	1267.47	729.333
						8	17546	1282.13	674.688
						8	17547	1277.69	739.25
						8	17548	1533.75	707.125
						8	17549	9439.24	925.529
						8	17550	1288.07	666.267
						8	17551	1628	703.4
						8	17552	12921.5	984.4
						8	17553	7581.81	850.75
						8	17554	4182.79	776.263
						8	17555	1457.29	697.571
						8	17556	1492.11	666.316
						8	17557	1033	716.105
						8	17558	12171.2	884.7
						8	17559	17325.9	1050
						8	17560	1402.67	654.4
						8	17561	1972.88	680.25
						8	17562	26501.9	1648
						8	17563	14681.9	988.111
						8	17564	1478.28	686.167
						8	17565	3081.59	661.353
						8	17566	1858.88	595.313
						8	17567	1199.19	648.188
						8	17568	1170.73	588.867
						8	17569	2854.5	784.125
						8	17570	30669.8	2002.8
						8	17571	16389.9	997.063
						8	17572	50765.8	2324.67
						8	17574	1948.88	589.063
						8	17575	3365.17	665.722
						8	17577	2625.95	713.5
						8	17578	21462.6	1471.67
						8	17579	13094	891.438
						8	17580	3613.17	709.833
						8	17581	13272.1	946.25
						8	17582	1380.82	859.294
						8	17583	3267.35	614.765
						8	17585	1456.47	709.267
						8	17586	1200.31	573.625
						8	17587	3186.87	736.733
						8	17588	6633.35	896.647
						8	17589	7201.07	914.267
						8	17590	3043.18	763.235
						8	17591	6421.12	811.118
						8	17592	5779.47	752.133
						8	17593	6433.05	805.864
						8	17594	5529.31	732.75
						8	17595	1340.33	725
						8	17596	1347.18	747.353
						8	17597	1481.12	749.824
						8	17599	1297.07	738.133
						8	17600	1436.25	740.25
						8	17601	2868.25	773.8
						8	17602	3480.5	767.875
						8	17603	2904.82	699.765
						8	17604	3393.42	859.895
						8	17605	22273.2	1133.17
						8	17606	18206.8	1007.94
						8	17607	32771.3	1385.59
						8	17608	1165.06	665.438
						8	17609	1157	727.875
						8	17610	2724	826.813
						8	17611	8156.82	964.059
						8	17612	9618.53	934.6
						8	17613	9010.38	885.188
						8	17614	1215.2	639.267
						8	17615	1837.75	684.05
						8	17617	3033.14	840.929
						8	17618	20582.9	1155.56
						8	17619	18832.8	1117.68
						8	17620	3133.29	759.824
						8	17621	2599.41	773.588
						8	17622	5431.59	816.235
						8	17623	1120.56	657.25
						8	17624	1126.19	748.875
						8	17625	1361.89	824.444
						8	17626	1427.36	778
						8	17627	1487.33	719.889
						8	17628	3171.88	748.813
						8	17629	5701	948.722
						8	17630	1476.31	705.563
						8	17631	1552.81	763.25
						8	17632	1463.5	669.063
						8	17633	1907.3	741.05
						8	17635	1036	747.313
						8	17636	1256.94	781.938
						8	17637	1181.33	569.111
[truncated: 442 more rows]
