# Supplementary material for: Non-canonical Hedgehog signaling regulates spinal cord and muscle regeneration in Xenopus laevis larvae
Source: eLife. 2021 May 6;10:e61804. doi: 10.7554/eLife.61804 (PMC8137141; doi:10.7554/eLife.61804)
Supplement: Figure 3—source data 1. [file elife-61804-fig3-data1.xlsx]

## Sheet: 72h treatment
raw values	12/101 volume									not usable	not usable				normalized to sample set matched control		7/27 DMSO ctrl	7/27 10 µM cyc	7/27 10 µM GANT61	7/27 cyc + GANT61	8/25 DMSO ctrl	8/25 10 µM cyc	8/25 10 µM GANT61	8/25 cyc + GANT61	3/9 DMSO ctrl	3/9 10 µM GANT61		combined stats	DMSO	10 µM GANT61	10 µM cyc	cyc + GANT
	1	7/27 DMSO ctrl	7/27 10 µM cyc	7/27 10 µM GANT61	7/27 cyc + GANT61	8/25 DMSO ctrl	8/25 10 µM cyc	8/25 10 µM GANT61	8/25 cyc + GANT61	3/9 DMSO ctrl	3/9 10 µM GANT61					1		10.5654		8.0744	64.4692	28.4593	91.7792	24.5087					104.192	106	10.5654	8.0744
	2		165416		126416	295289	130352	420377	112257							2		7.01282	106	9.49749	69.8017	66.6349	98.9019	21.3737					143.17	78.3467	7.01282	9.49749
	3		109795	1.65958e+06	148696	319713	305208	453001	97897.9							3	104.192	17.2756	78.3467	12.7048	126.505	57.1847	104.313						87.5858	50.8109	17.2756	12.7048
	4	1.63127e+06	270474	1.22663e+06	198911	579432	261924	477786								4	143.17	6.73199	50.8109	11.549	117.042	36.3513	101.699	22.0372					100.974	51.2275	6.73199	11.549
	5	2.24152e+06	105399	795515	180816	536090	166500	465815	100937							5	87.5858	14.8257	51.2275	11.3969	125.478	34.9317	120.419	39.5202					147.539	76.0193	14.8257	11.3969
	6	1.37128e+06	232118	802038	178434	574730	159998	551555	181014							6	100.974	10.8026	76.0193	13.0052	146.251	27.7813		40.1305					79.2793	59.3329	10.8026	13.0052
	7	1.58089e+06	169130	1.19019e+06	203614	669874	127247		183810							7	147.539	5.99753	59.3329	7.84963	97.7689	51.859	64.6968	20.7407					57.6955	64.7909	5.99753	7.84963
	8	2.30992e+06	93899.6	928939	122897	447812	237530	296331	94998.9							8	79.2793		64.7909	15.3348	138.384		75.9863	44.7631					62.5749	72.7392	6.42796	15.3348
	9	1.24123e+06		1.01439e+06	240088	633839		348041	205029							9	57.6955		72.7392	14.062	126.399		96.4953						121.023	62.8956	5.81846	14.062
	10	903303		1.13883e+06	220161	578947		441978								10	62.5749	6.42796	62.8956		71.7393		96.9407						95.967	91.7792	28.4593	24.5087
	11	979696	100639	984718		328588		444018								11	121.023	5.81846			70.5592								64.4692	98.9019	66.6349	21.3737
	12	1.89478e+06	91096			323183										12	95.967				45.6021		73.7402						69.8017	104.313	57.1847	22.0372
	13	1.5025e+06				208872		337753								13													126.505	101.699	36.3513	39.5202
	14															14													117.042	120.419	34.9317	40.1305
	15															15													125.478	64.6968	27.7813	20.7407
	16															16													146.251	75.9863	51.859	44.7631
	17															17													97.7689	96.4953
	18															18													138.384	96.9407
	19															19													126.399	73.7402
	20															20													71.7393
																													70.5592
																													45.6021
																												average	100	81.4282	24.2913	19.7843
																												S ERROR	6.76275	4.64522	5.01423	2.97938
																												N	22	19	16	16
raw values	SC regen length	7/27 DMSO ctrl	7/27 10 µM cyc	7/27 10 µM GANT61	7/27 cyc + GANT61	8/25 DMSO ctrl	8/25 10 µM cyc	8/25 10 µM GANT61	8/25 cyc + GANT61	3/9 DMSO ctrl	3/9 10 µM GANT61						7/27 DMSO ctrl	7/27 10 µM cyc	7/27 10 µM GANT61	7/27 cyc + GANT61	8/25 DMSO ctrl	8/25 10 µM cyc	8/25 10 µM GANT61	8/25 cyc + GANT61	3/9 DMSO ctrl	3/9 10 µM GANT61			DMSO	10 µM GANT61	10 µM cyc	cyc + GANT
	1		799.07	983.942	787.957	789.101	688.939	713.706		710.361	689.51					1		77.0843	94.9184	76.0122	101.549	88.6595	91.8467		108.485	105.3			87.4065	94.9184	77.0843	76.0122
	2	906.072	773.053	1114.62		764.968	720.703	745.467	672.335	699.321	658.096					2	87.4065	74.5745	107.524		98.4436	92.7471	95.934	86.5227	106.799	100.503			93.3532	107.524	74.5745	63.907
	3	967.717	802.492	951.355	662.472	816.135	736.114	682.573	677.615	704.759	693.107					3	93.3532	77.4144	91.7748	63.907	105.028	94.7305	87.8402	87.2021	107.629	105.85			108.937	91.7748	77.4144	74.6788
	4	1129.27	713.984		774.134	750.438	681.445	643.973	683.173	621.188						4	108.937	68.8762		74.6788	96.5738	87.695	82.8728	87.9174	94.8663				119.309	85.2616	68.8762	81.8953
	5	1236.78	799.867	883.838	848.942	675.419	669.233	755.389	750.538	517.248	629.902					5	119.309	77.1612	85.2616	81.8953	86.9196	86.1235	97.2109	96.5866	78.9929	96.1971			97.4374	91.2821	77.1612	80.5047
	6	1010.05	629.34	946.247	834.527	846.099	713.513	733.936	673.814	722.798	659.825					6	97.4374	60.7109	91.2821	80.5047	108.884	91.8219	94.4501	86.713	110.384	100.767			93.0661	109.605	60.7109	81.6988
	7	964.741		1136.18	846.905	815.485	726.103	691.653	696.535	614.614	687.205					7	93.0661		109.605	81.6988	104.945	93.4422	89.0087	89.637	93.8624	104.948			96.556	98.8174	89.8415	65.6011
	8	1000.92	931.314	1024.36	680.033	791.014		690.365	709.048	690.492	665.344					8	96.556	89.8415	98.8174	65.6011	101.795		88.843	91.2473	105.45	101.61			104.73	96.7264	82.7958	75.6156
	9	1085.65	858.276	1002.68	783.845	783.158		618.506		536.684	646.375					9	104.73	82.7958	96.7264	75.6156	100.784		79.5955		81.961	98.7128			96.7788	110.428	91.2529	86.5227
	10	1003.23	945.944	1144.72		761.112		652.948		641.257	648.859					10	96.7788	91.2529	110.428		97.9474		84.0278		97.9312	99.0922			102.09	91.8467	76.1461	87.2021
	11	1058.28	789.345			754.753					690.196					11	102.09	76.1461			97.1291					105.405			100.336	95.934	88.6595	87.9174
	12	1040.1						647.934		693.947	700.474					12	100.336						83.3825		105.978	106.975			101.549	87.8402	92.7471	96.5866
	13									732.141						13									111.811				98.4436	82.8728	94.7305	86.713
	14									647.018						14									98.811				105.028	97.2109	87.695	89.637
	15									635.421						15									97.04				96.5738	94.4501	86.1235	91.2473
	16															16													86.9196	89.0087	91.8219
	17															17													108.884	88.843	93.4422
	18															18													104.945	79.5955
	19															19													101.795	84.0278
	20															20													100.784	83.3825
	21																												97.9474	105.3
	22																												97.1291	100.503
	23																												108.485	105.85
	24																												106.799	96.1971
	25																												107.629	100.767
																													94.8663	104.948
																													78.9929	101.61
																													110.384	98.7128
																													93.8624	99.0922
																													105.45	105.405
																													81.961	106.975
																													97.9312
																													105.978
																													111.811
																													98.811
																													97.04
																												average	100	96.3455	83.0045	81.716
																												S ERROR	1.38765	1.53213	2.35834	2.37945
																												N	36	31	17	15
										not usable	not usable
raw values	muscle regen length	7/27 DMSO ctrl	7/27 10 µM cyc	7/27 10 µM GANT61	7/27 cyc + GANT61	8/25 DMSO ctrl	8/25 10 µM cyc	8/25 10 µM GANT61	8/25 cyc + GANT61	3/9 DMSO ctrl	3/9 10 µM GANT61						7/27 DMSO ctrl	7/27 10 µM cyc	7/27 10 µM GANT61	7/27 cyc + GANT61	8/25 DMSO ctrl	8/25 10 µM cyc	8/25 10 µM GANT61	8/25 cyc + GANT61	3/9 DMSO ctrl	3/9 10 µM GANT61			DMSO	10 µM GANT61	10 µM cyc	cyc + GANT
	1		116.46	761.083	158.102	391.13	110.354	476.671	91.04							1		14.9948	97.9932	20.3564	82.7285	23.3411	100.821	19.256					80.9178	97.9932	14.9948	20.3564
	2		170.559	827.514	74.6834	402.146	120.112	473.218	64.4268							2		21.9603	106.547	9.61586	85.0585	25.4051	100.091	13.627					115.661	106.547	21.9603	9.61586
	3	628.464		643.971	153.268		138.951	431.685	81.2207							3	80.9178		82.9144	19.734		29.3897	91.3064	17.1791					124.089	82.9144	12.5654	19.734
	4	898.302	97.5918		178.428	467.357	90.0036	531.882	66.2716							4	115.661	12.5654		22.9735	98.8514	19.0368	112.499	14.0172					107.437	82.2541	14.1217	22.9735
	5	963.762	109.679	638.842	135.102	519.438	89.3012	419.308	90.08							5	124.089	14.1217	82.2541	17.3951	109.867	18.8882	88.6885	19.053					90.5523	82.0687	14.7921	17.3951
	6	834.43	114.886	637.402	99.8046	516.817	103.865									6	107.437	14.7921	82.0687	12.8503	109.313	21.9686							99.0386	93.5523	12.8744	12.8503
	7	703.292	99.9918	726.592	145.111	378.458	106.384	427.237	78.7234							7	90.5523	12.8744	93.5523	18.6838	80.0482	22.5014	90.3656	16.6509					94.9517	85.3995	13.9968	18.6838
	8	769.202	108.709	663.272	92.7263	453.758			96.2486							8	99.0386	13.9968	85.3995	11.939	95.9751			20.3577					89.4613	87.1035	11.9151	11.939
	9	737.461		676.506		570.965		395.546								9	94.9517		87.1035		120.766		83.6625						105.689	104.921	12.4506	19.256
	10	694.818	92.541	814.887		455.422		544.762								10	89.4613	11.9151	104.921		96.3271		115.223						92.2026	100.821	23.3411	13.627
	11	820.852	96.6999													11	105.689	12.4506											82.7285	100.091	25.4051	17.1791
	12	716.109				572.383		494.697								12	92.2026				121.066		104.634						85.0585	91.3064	29.3897	14.0172
	13															13													98.8514	112.499	19.0368	19.053
	14															14													109.867	88.6885	18.8882	16.6509
	15															15													109.313	90.3656	21.9686	20.3577
	16															16													80.0482	83.6625	22.5014
	17															17													95.9751	115.223
	18															18													120.766	104.634
	19															19													96.3271
	20															20													121.066
																												average	100	95.0025	18.1377	16.9126
																												S ERROR	3.06705	2.52075	1.35456	0.965266
																												N	20	18	16	15
raw values	Sox2 in regen SC	7/27 DMSO ctrl	7/27 10 µM cyc	7/27 10 µM GANT61	7/27 cyc + GANT61	8/25 DMSO ctrl	8/25 10 µM cyc	8/25 10 µM GANT61	8/25 cyc + GANT61	3/9 DMSO ctrl	3/9 10 µM GANT61						7/27 DMSO ctrl	7/27 10 µM cyc	7/27 10 µM GANT61	7/27 cyc + GANT61	8/25 DMSO ctrl	8/25 10 µM cyc	8/25 10 µM GANT61	8/25 cyc + GANT61	3/9 DMSO ctrl	3/9 10 µM GANT61			DMSO	10 µM GANT61	10 µM cyc	cyc + GANT
	1		643	1304		1384	984	1277	633	605						1		37.8631	76.7862		88.6256	63.0113	81.7738	40.5347	102.407				91.0364	76.7862	37.8631	28.5593
	2	1546	473	1408		1647	833	1355	627		528					2	91.0364	27.8527	82.9102		105.467	53.3419	86.7686	40.1505		89.3737			97.8671	82.9102	27.8527	43.1039
	3		474	1104	485	1404	861	1285	707		627					3		27.9115	65.0092	28.5593	89.9063	55.1349	82.2861	45.2734		106.131			112.294	65.0092	27.9115	35.1544
	4	1662					857	1279	660	545						4	97.8671					54.8787	81.9019	42.2637	92.2513				104.639	77.7283	35.0955	38.2164
	5	1907			732	1605	791	1330	719	544						5	112.294			43.1039	102.778	50.6524	85.1677	46.0418	92.082				104.58	93.274	53.1733	42.044
	6	1777	596		597	1750		1298	751	739	478					6	104.639	35.0955		35.1544	112.063		83.1185	48.0909	125.089	80.9103			113.354	81.7738	54.9398	39.0408
	7	1776			649	1600	761	1191	897	509						7	104.58			38.2164	102.457	48.7313	76.2667	57.4402	86.1576				102.813	86.7686	45.1649	40.5347
	8		903		714			1424		621	599					8		53.1733		42.044			91.1871		105.116	101.392			87.9155	82.2861	34.9778	40.1505
	9	1925	933	1320	663	1426		1164		617						9	113.354	54.9398	77.7283	39.0408	91.3151		74.5377		104.439				85.5012	81.9019	63.0113	45.2734
	10	1746	767	1584						585	550					10	102.813	45.1649	93.274						99.022	93.0976			88.6256	85.1677	53.3419	42.2637
	11	1493	594			1677					598					11	87.9155	34.9778			107.388					101.222			105.467	83.1185	55.1349	46.0418
	12	1452														12	85.5012												89.9063	76.2667	54.8787	48.0909
	13															13													102.778	91.1871	50.6524	57.4402
	14									552						14									93.4361				112.063	74.5377	48.7313
	15															15													102.457	89.3737
	16															16													91.3151	106.131
	17															17													107.388	80.9103
	18															18													102.407	101.392
	19															19													92.2513	93.0976
	20															20													92.082	101.222
																													125.089
																													86.1576
																													105.116
																													104.439
																													99.022
																													93.4361
																												average	100	85.5422	45.9092	41.9934
																												S ERROR	1.92593	2.25062	2.99244	1.89465
																												N	26	20	14	13
raw values	P-H3 in regen tail	7/27 DMSO ctrl	7/27 10 µM cyc	7/27 10 µM GANT61	7/27 cyc + GANT61	8/25 DMSO ctrl	8/25 10 µM cyc	8/25 10 µM GANT61	8/25 cyc + GANT61	3/9 DMSO ctrl	3/9 10 µM GANT61						7/27 DMSO ctrl	7/27 10 µM cyc	7/27 10 µM GANT61	7/27 cyc + GANT61	8/25 DMSO ctrl	8/25 10 µM cyc	8/25 10 µM GANT61	8/25 cyc + GANT61	3/9 DMSO ctrl	3/9 10 µM GANT61			DMSO	10 µM GANT61	10 µM cyc	cyc + GANT
	1	110	74	142	64	151	65	210	51	114						1	72.7601	48.9477	93.9266	42.3331	86.691	37.3173	120.564	29.2797	106.432				72.7601	93.9266	48.9477	42.3331
	2	129	80	137			40	187	40		94					2	85.3277	52.9164	90.6194			22.9645	107.359	22.9645		87.7593			85.3277	90.6194	52.9164	52.9164
	3	144	75	165	80	147	64	157	76							3	95.2495	49.6091	109.14	52.9164	84.3946	36.7432	90.1357	43.6326					95.2495	109.14	49.6091	43.656
	4	182	33		66	217	61	145	42	69						4	120.385	21.828		43.656	124.582	35.0209	83.2463	24.1127	64.4191				120.385	113.109	21.828	71.4372
	5		34	171	108	173	62	151	87	82						5		22.4895	113.109	71.4372	99.3215	35.595	86.691	49.9478	76.556				111.124	89.2965	22.4895	58.2081
	6	168	26	135	88	190	54	148	64	147	110					6	111.124	17.1978	89.2965	58.2081	109.081	31.0021	84.9687	36.7432	137.241	102.697			94.5881	119.062	17.1978	42.3331
	7	143	18	180	64	202	63	157	86	126						7	94.5881	11.9062	119.062	42.3331	115.971	36.1691	90.1357	49.3737	117.635				101.864	90.6194	11.9062	46.3019
	8	154	76	137	70	154		176	68	92	115					8	101.864	50.2706	90.6194	46.3019	88.4134		101.044	39.0397	85.8921	107.365			117.078	121.708	50.2706	29.104
	9	177		184	44	144		132								9	117.078		121.708	29.104	82.6722		75.7829						95.2495	98.5568	31.0884	29.2797
	10	144	47	149		184				120	105					10	95.2495	31.0884	98.5568		105.637				112.033	98.029			109.14	120.564	20.5051	22.9645
	11	165	31			215				121	89					11	109.14	20.5051			123.434				112.967	83.0913			97.2339	107.359	37.3173	43.6326
	12	147				139		169			116					12	97.2339				79.8017		97.0251			108.299			86.691	90.1357	22.9645	24.1127
	13															13													84.3946	83.2463	36.7432	49.9478
	14									93						14									86.8257				124.582	86.691	35.0209	36.7432
	15															15													99.3215	84.9687	35.595	49.3737
	16															16													109.081	90.1357	31.0021	39.0397
	17															17													115.971	101.044	36.1691
	18															18													88.4134	75.7829
	19															19													82.6722	97.0251
	20															20													105.637	87.7593
																													123.434	102.697
																													79.8017	107.365
																													106.432	98.029
																													64.4191	83.0913
																													76.556	108.299
																													137.241
																													117.635
																													85.8921
																													112.033
																													112.967
																													86.8257
																												average	100	98.0092	33.0336	42.5865
																												S ERROR	3.1081	2.53055	3.01531	3.1829
																												N	31	25	17	16
