# Supplementary material for: Non-canonical Hedgehog signaling regulates spinal cord and muscle regeneration in Xenopus laevis larvae
Source: eLife. 2021 May 6;10:e61804. doi: 10.7554/eLife.61804 (PMC8137141; doi:10.7554/eLife.61804)
Supplement: Figure 4—figure supplement 1—source data 1. [file elife-61804-fig4-figsupp1-data1.xlsx]

## Sheet: control uninjected +- UV
raw values	12/101 volume	2018-01-26 no UV	2018-01-26 30 min UV	2018-02-23 no UV	2018-02-03 30 min UV			normalized to sample set matched control	12/101 volume	2018-01-26 no UV	2018-01-26 30 min UV	2018-02-23 no UV	2018-02-03 30 min UV					combined stats
	1	782014		1.02075e+06	937482				1	98.7039	0	141.547	130						no UV ctrl	30 min UV
	2	603053	974606	767329	1.33882e+06				2	76.1159	123.012	106.405	185.653						98.7039	123.012
	3	1.2435e+06	420473	576481					3	156.952	53.0711	79.9402	0						76.1159	53.0711
	4	439506	1.53094e+06						4	55.4734	193.231	0	0						156.952	193.231
	5	799994	484242	606398	892889				5	100.973	61.1199	84.0887	123.816						55.4734	61.1199
	6	693719	1.02646e+06	741232					6	87.5595	129.557	102.786	0						100.973	129.557
	7	886452	455151	751981					7	111.886	57.448	104.277	0						87.5595	57.448
	8	538614	560897	583814					8	67.9825	70.7951	80.9571	0						111.886	70.7951
	9		834427						9	0	105.319	0	0						67.9825	105.319
	10	728141	900511						10	91.9042	113.66	0	0						91.9042	113.66
	11		911990						11	0	115.109	0	0						75.7023	115.109
	12	599776	591933						12	75.7023	74.7124	0	0						114.145	74.7124
	13	904350	1.02807e+06						13	114.145	129.76	0	0						162.602	129.76
	14	1.28827e+06	611857						14	162.602	77.2271	0	0						141.547	77.2271
	15								15	0	0	0	0						106.405	130
	16								16	0	0	0	0						79.9402	185.653
	17								17	0	0	0	0						84.0887	123.816
	18								18	0	0	0	0						102.786
	19								19	0	0	0	0						104.277
	20								20	0	0	0	0						80.9571
																		average	100	108.968
																		S ERROR	6.55762	10.5033
																		N	19	16
raw values	SC regen length	2018-01-26 no UV	2018-01-26 30 min UV	2018-02-23 no UV	2018-02-03 30 min UV				SC regen length	2018-01-26 no UV	2018-01-26 30 min UV	2018-02-23 no UV	2018-02-03 30 min UV						no UV ctrl	30 min UV
	1	739.804	565.813	740.326	737.438				1	112.542	86.0739	97.1659	96.7868						112.542	86.0739
	2		611.978	644.942	785.413				2	0	93.0967	84.6469	103.083						102.963	93.0967
	3		616.877	827.158					3	0	93.8419	108.562	0						88.5871	93.8419
	4	676.833		715.929					4	102.963	0	93.9637	0						93.4984	91.1408
	5	582.334	599.121	831.205	795.637				5	88.5871	91.1408	109.093	104.425						107.782	86.5378
	6	614.619		826.004					6	93.4984	0	108.411	0						98.9694	89.8137
	7	708.512	568.862	747.877					7	107.782	86.5378	98.1569	0						76.5116	88.4611
	8	650.583	590.397						8	98.9694	89.8137	0	0						126.372	95.7245
	9	502.955	581.506						9	76.5116	88.4611	0	0						94.696	82.8972
	10	830.714							10	126.372	0	0	0						107.37	96.7868
	11								11	0	0	0	0						90.7089	103.083
	12	622.491	629.252						12	94.696	95.7245	0	0						97.1659	104.425
	13	705.806							13	107.37	0	0	0						84.6469
	14	596.282	544.931						14	90.7089	82.8972	0	0						108.562
	15								15	0	0	0	0						93.9637
	16								16	0	0	0	0						109.093
	17								17	0	0	0	0						108.411
	18								18	0	0	0	0						98.1569
	19								19	0	0	0	0
	20								20	0	0	0	0
	21								21
	22								22
	23								23
	24								24
	25								25
																		average	100	92.6569
																		S ERROR	2.75734	1.90551
																		N	16	10
raw values	muscle regen length	2018-01-26 no UV	2018-01-26 30 min UV	2018-02-23 no UV	2018-02-03 30 min UV				muscle regen length	2018-01-26 no UV	2018-01-26 30 min UV	2018-02-23 no UV	2018-02-03 30 min UV						no UV ctrl	30 min UV
	1	438.175	301.066	541.126	536.023				1	119.263	81.9446	109.558	108.524						119.263	81.9446
	2		303.359	466.201					2	0	82.5687	94.3881	0						115.925	82.5687
	3	425.912		440.587	513.374				3	115.925	0	89.2022	103.939						95.5468	117.124
	4	351.041	430.316	492.317					4	95.5468	117.124	99.6756	0						70.0418	102.852
	5	257.335	377.881	545.195	532.734				5	70.0418	102.852	110.381	107.859						84.6958	97.9415
	6	311.174	359.839	476.249					6	84.6958	97.9415	96.4224	0						75.5129	98.6823
	7	277.436	362.561	495.76					7	75.5129	98.6823	100.373	0						99.3078	78.6474
	8	364.859	288.952						8	99.3078	78.6474	0	0						116.492	98.4823
	9	427.993	361.826						9	116.492	98.4823	0	0						122.409	87.4002
	10	449.734	321.11						10	122.409	87.4002	0	0						105.191	96.6573
	11		355.121						11	0	96.6573	0	0						90.9603	77.9032
	12	386.474	286.218						12	105.191	77.9032	0	0						104.654	92.6742
	13	334.19	340.487						13	90.9603	92.6742	0	0						109.558	81.7889
	14	384.502	300.494						14	104.654	81.7889	0	0						94.3881	108.524
	15								15	0	0	0	0						89.2022	103.939
	16								16	0	0	0	0						99.6756	107.859
	17								17	0	0	0	0						110.381
	18								18	0	0	0	0						96.4224
	19								19	0	0	0	0						100.373
	20								20	0	0	0	0
																		average	100	94.6868
																		S ERROR	3.26287	2.98412
																		N	19	16
raw values	P-H3 in regen tail	2018-01-26 no UV	2018-01-26 30 min UV	2018-02-23 no UV	2018-02-03 30 min UV				P-H3 in regen tail	2018-01-26 no UV	2018-01-26 30 min UV	2018-02-23 no UV	2018-02-03 30 min UV	5-13-19 cyc 24 hrs	5-13-19 cyc 72 hrs				no UV ctrl	30 min UV
	1	95	147	147					1	97.6027	151.027	124.426	0						97.6027	151.027
	2	96	135	106	124				2	98.6301	138.699	89.7219	104.958						98.6301	138.699
	3	134	104	116	141				3	137.671	106.849	98.1862	119.347						137.671	106.849
	4	93		101					4	95.5479	0	85.4897	0						95.5479	82.1918
	5	64	80	112	134				5	65.7534	82.1918	94.8005	113.422						65.7534	156.164
	6	87	152	134					6	89.3836	156.164	113.422	0						89.3836	83.2192
	7	103	81	111					7	105.822	83.2192	93.9541	0						105.822	70.8904
	8	99	69						8	101.712	70.8904	0	0						101.712	113.014
	9	89	110						9	91.4384	113.014	0	0						91.4384	109.932
	10	113	107						10	116.096	109.932	0	0						116.096	109.932
	11	88	107						11	90.411	109.932	0	0						90.411	92.4658
	12	107	90						12	109.932	92.4658	0	0						109.932	132.534
	13		129						13	0	132.534	0	0						124.426	144.863
	14		141						14	0	144.863	0	0						89.7219	104.958
	15								15	0	0	0	0						98.1862	119.347
	16								16	0	0	0	0						85.4897	113.422
	17								17	0	0	0	0						94.8005
	18								18	0	0	0	0						113.422
	19								19	0	0	0	0						93.9541
	20								20	0	0	0	0
																		average	100	114.344
																		S ERROR	3.60787	6.30156
																		N	15	12
