# Supplementary material for: Non-canonical Hedgehog signaling regulates spinal cord and muscle regeneration in Xenopus laevis larvae
Source: eLife. 2021 May 6;10:e61804. doi: 10.7554/eLife.61804 (PMC8137141; doi:10.7554/eLife.61804)
Supplement: Figure 4—source data 1. [file elife-61804-fig4-data1.xlsx]

## Sheet: 72h treatment
raw values	12/101 volume	12-2-19 2 pmol no UV	12-2-19 2 pmol +UV	12-2-19 2 pmol no UV	12-2-19 2 pmol +UV	01-15-20 2 pmol no UV	01-15-20 2 pmol +UV					normalized to sample set matched control		12-2-19 2 pmol no UV	12-2-19 2 pmol +UV	12-2-19 2 pmol no UV	12-2-19 2 pmol +UV	01-15-20 2 pmol no UV	01-15-20 2 pmol +UV		combined stats
	1	80370.2	154644	166458	130324	110116	148725						1	91.5141	176.087	105.412	82.5292	136.308	184.101			no UV control	30 min UV
	2	108026	72019.8		135094	93267.5	93769.9						2	123.005	82.0059	0	85.5503	115.452	116.074			91.5141	176.087
	3		93688.9	133850	128372	74246.2							3	0	106.68	84.7623	81.2936	91.9068	0			123.005	82.0059
	4	120716	75958.1	195590	90130.4	46943.2	82396.7						4	137.454	86.4904	123.86	57.0763	58.1093	101.996			137.454	106.68
	5		104734	126569		43621.3	89200.7						5	0	119.256	80.1513	0	53.9972	110.418			101.105	86.4904
	6	88792.8	92231.5	136033	98415.1	97243.1	73395.7						6	101.105	105.02	86.1451	62.3227	120.374	90.8538			97.3002	119.256
	7	85451.7	189588	174063		91506.7	107782						7	97.3002	215.875	110.228	0	113.273	133.42			101.835	105.02
	8	89434.1	124066	126208		67054.1	73984.6						8	101.835	141.269	79.923	0	83.0038	91.5829			104.244	215.875
	9	91549.8		142220	109832	61196	146112						9	104.244	0	90.0631	69.5526	75.7523	180.867			70.1098	141.269
	10	61572.3	121508	139185	104121	64796.4	60818.4						10	70.1098	138.357	88.1411	65.9361	80.2092	75.2849			106.451	138.357
	11	93488.3	102264	229281	108231	138637							11	106.451	116.444	145.195	68.5387	171.614	0			66.9825	116.444
	12	58825.8	112589	167574	182868		54424.5						12	66.9825	128.2	106.119	115.804	0	67.3701			105.412	128.2
	13												13	0	0	0	0	0	0			84.7623	82.5292
	14												14	0	0	0	0	0	0			123.86	85.5503
	15												15	0	0	0	0	0	0			80.1513	81.2936
	16												16	0	0	0	0	0	0			86.1451	57.0763
	17												17	0	0	0	0	0	0			110.228	62.3227
	18												18	0	0	0	0	0	0			79.923	69.5526
	19												19	0	0	0	0	0	0			90.0631	65.9361
	20												20	0	0	0	0	0	0			88.1411	68.5387
																						145.195	115.804
																						106.119	184.101
																						136.308	116.074
																						115.452	101.996
																						91.9068	110.418
																						58.1093	90.8538
																						53.9972	133.42
																						120.374	91.5829
																						113.273	180.867
																						83.0038	75.2849
																						75.7523	67.3701
																						80.2092
																						171.614
																					average	100	108.542
																					S ERROR	4.5774	7.31851
																					N	32	30
raw values	SC regen length	12-2-19 2 pmol no UV	12-2-19 2 pmol +UV	12-2-19 2 pmol no UV	12-2-19 2 pmol +UV	01-15-20 2 pmol no UV	01-15-20 2 pmol +UV							8/25 DMSO	8/25 KT5720	12/19 DMSO	12/19 cyc	12/19 KT5720	12/19 KT + cyc			no UV control	30 min UV
	1	583.498	493.283	561.305	492.021	591.432	497.312						1	12-2-19 2 pmol no UV	12-2-19 2 pmol +UV	12-2-19 2 pmol no UV	12-2-19 2 pmol +UV	01-15-20 2 pmol no UV	01-15-20 2 pmol +UV			96.9807	81.9864
	2	543.42		555.12	380.303	356.229	352.191						2	96.9807	81.9864	116.902	102.473	125.809	105.788			90.3195	86.284
	3	480.8	519.14	447.424	352.68	615.385	307.593						3	90.3195	0	115.614	79.2052	75.7772	74.9182			79.9117	95.0192
	4	695.265	571.696	424.195	464.313	499.95	357.284						4	79.9117	86.284	93.1845	73.4523	130.905	65.4313			115.557	84.3371
	5		507.426	507.834	439.645	409.053	541.048						5	115.557	95.0192	88.3466	96.702	106.349	76.0015			97.9321	83.8592
	6	589.222	504.55	552.871	259.934	467.923	567.258						6	0	84.3371	105.766	91.5643	87.0139	115.092			100.502	91.5336
	7	604.683	550.724	341.968	285.813	489.967	299.015						7	97.9321	83.8592	115.146	54.1361	99.5367	120.667			105.526	81.1128
	8	634.912	488.027	422.22	518.574	433.545	356.011						8	100.502	91.5336	71.2213	59.5259	104.226	63.6065			104.096	98.7238
	9	626.307	593.985	358.089	424.478	480.746	466.915						9	105.526	81.1128	87.9352	108.003	92.2239	75.7307			100.898	72.5181
	10	607.069	436.315	514.008	348.935		479.551						10	104.096	98.7238	74.5787	88.4055	102.264	99.3223			113.895	82.5374
	11	685.266	496.598	596.601	414.47	377.36	384.496						11	100.898	72.5181	107.052	72.6724	0	102.01			94.3818	89.9119
	12	567.861	540.967		323.415	449.52	555.091						12	113.895	82.5374	124.253	86.3211	80.2722	81.79			116.902	102.473
	13												13	94.3818	89.9119	0	67.3572	95.6221	118.079			115.614	79.2052
	14												14	0	0	0	0	0	0			93.1845	73.4523
	15												15	0	0	0	0	0	0			88.3466	96.702
	16												16	0	0	0	0	0	0			105.766	91.5643
	17												17	0	0	0	0	0	0			115.146	54.1361
	18												18	0	0	0	0	0	0			71.2213	59.5259
	19												19	0	0	0	0	0	0			87.9352	108.003
	20												20	0	0	0	0	0	0			74.5787	88.4055
	21													0	0	0	0	0	0			107.052	72.6724
	22																					124.253	86.3211
	23																					125.809	67.3572
	24																					75.7772	105.788
	25																					130.905	74.9182
																						106.349	65.4313
																						87.0139	76.0015
																						99.5367	115.092
																						104.226	120.667
																						92.2239	63.6065
																						102.264	75.7307
																						80.2722	99.3223
																						95.6221	102.01
																							81.79
																							118.079
																					average	100	86.4594
																					S ERROR	2.60517	2.7574
																					N	33	35
raw values	muscle regen length	12-2-19 2 pmol no UV	12-2-19 2 pmol +UV	12-2-19 2 pmol no UV	12-2-19 2 pmol +UV	01-15-20 2 pmol no UV	01-15-20 2 pmol +UV							12-2-19 2 pmol no UV	12-2-19 2 pmol +UV	12-2-19 2 pmol no UV	12-2-19 2 pmol +UV	01-15-20 2 pmol no UV	01-15-20 2 pmol +UV			no UV control	30 min UV
	1	161.667	110.867	315.499	253.76	98.8601	136.575						1	79.3862	54.441	148.669	119.576	89.1974	123.226			79.3862	54.441
	2	312.008	73.3976	303.725	191.378	128.189	98.4962						2	153.211	36.0417	143.121	90.1807	115.66	88.8691			153.211	36.0417
	3	226.1	125.197	211.721	119.74	78.2393	125.286						3	111.026	61.4777	99.7667	56.4236	70.5921	113.04			111.026	61.4777
	4	378.608	111.722	168.917	90.2083	90.6995	54.0509						4	185.915	54.8608	79.5967	42.5078	81.8344	48.7679			185.915	54.8608
	5	105.289	111.896	158.494	178.469	51.7831	132.571						5	51.7019	54.9463	74.6852	84.0978	46.7218	119.613			51.7019	54.9463
	6	79.4811	64.2697	199.833	145.473	272.811	138.928						6	39.029	31.5595	94.1649	68.5495	246.146	125.349			39.029	31.5595
	7	78.5873	220.887	141.06		83.3227	169.435						7	38.5901	108.466	66.47	0	75.1787	152.874			38.5901	108.466
	8	218.341	163.867	85.4806	243.856	41.3791	186.944						8	107.216	80.4665	40.28	114.909	37.3347	168.672			107.216	80.4665
	9	384.298	111.762	236.7	130	63.0283	208.926						9	188.709	54.8805	111.537	61.2583	56.8679	188.505			188.709	54.8805
	10	282.853	99.0215	295.683	144.71	142.797	182.906						10	138.894	48.6243	139.331	68.1899	128.84	165.029			138.894	48.6243
	11	104.03		300.724	198.648								11	51.0837	0	141.707	93.6065	0	0			51.0837	57.8587
	12	112.492	117.827	128.756	81.1309	168.053	74.4097						12	55.2389	57.8587	60.6721	38.2303	151.627	67.1368			55.2389	119.576
	13												13	0	0	0	0	0	0			148.669	90.1807
	14												14	0	0	0	0	0	0			143.121	56.4236
	15												15	0	0	0	0	0	0			99.7667	42.5078
	16												16	0	0	0	0	0	0			79.5967	84.0978
	17												17	0	0	0	0	0	0			74.6852	68.5495
	18												18	0	0	0	0	0	0			94.1649	114.909
	19												19	0	0	0	0	0	0			66.47	61.2583
	20												20	0	0	0	0	0	0			40.28	68.1899
																						111.537	93.6065
																						139.331	38.2303
																						141.707	123.226
																						60.6721	88.8691
																						89.1974	113.04
																						115.66	48.7679
																						70.5921	119.613
																						81.8344	125.349
																						46.7218	152.874
																						246.146	168.672
																						75.1787	188.505
																						37.3347	165.029
																						56.8679	67.1368
																						128.84
																						151.627
																					average	100	86.1284
																					S ERROR	8.45362	7.25694
																					N	35	33
raw values	Sox2 in regen SC	12-2-19 2 pmol no UV	12-2-19 2 pmol +UV	12-2-19 2 pmol no UV	12-2-19 2 pmol +UV	01-15-20 2 pmol no UV	01-15-20 2 pmol +UV							12-2-19 2 pmol no UV	12-2-19 2 pmol +UV	12-2-19 2 pmol no UV	12-2-19 2 pmol +UV	01-15-20 2 pmol no UV	01-15-20 2 pmol +UV			no UV control	30 min UV
	1	767	829		708	809	709						1	94.6797	102.333	0	107.164	121.058	106.094			94.6797	102.333
	2	854		697	751	588	617						2	105.419	0	105.499	113.673	87.988	92.3276			105.419	103.814
	3		841	704		724							3	0	103.814	106.559	0	108.339	0			101.099	104.678
	4	819	848	589	630	666	613						4	101.099	104.678	89.1524	95.3582	99.6599	91.729			85.6684	87.1497
	5	694	706	693	601	574	577						5	85.6684	87.1497	104.894	90.9687	85.8931	86.342			93.0749	88.3842
	6	754	716	761	607	810	645						6	93.0749	88.3842	115.187	91.8769	121.208	96.5175			103.567	96.5313
	7	839		736		621	585						7	103.567	0	111.403	0	92.9261	87.5391			95.2969	92.5812
	8	772	782	544	650	533	561						8	95.2969	96.5313	82.3411	98.3855	79.7579	83.9478			112.455	107.164
	9	911					662						9	112.455	0	0	0	0	99.0614			109.74	113.673
	10		750	663	633	564	645						10	0	92.5812	100.353	95.8123	84.3967	96.5175			99.0001	95.3582
	11	889			616	684	611						11	109.74	0	0	93.2392	102.353	91.4297			105.499	90.9687
	12	802		559		778	650						12	99.0001	0	84.6115	0	116.42	97.2657			106.559	91.8769
	13												13	0	0	0	0	0	0			89.1524	98.3855
	14												14	0	0	0	0	0	0			104.894	95.8123
	15												15	0	0	0	0	0	0			115.187	93.2392
	16												16	0	0	0	0	0	0			111.403	106.094
	17												17	0	0	0	0	0	0			82.3411	92.3276
	18												18	0	0	0	0	0	0			100.353	91.729
	19												19	0	0	0	0	0	0			84.6115	86.342
	20												20	0	0	0	0	0	0			121.058	96.5175
																						87.988	87.5391
																						108.339	83.9478
																						99.6599	99.0614
																						85.8931	96.5175
																						121.208	91.4297
																						92.9261	97.2657
																						79.7579
																						84.3967
																						102.353
																						116.42
																					average	100	95.797
																					S ERROR	2.14609	1.41035
																					N	30	26
raw values	P-H3 in regen tail	12-2-19 2 pmol no UV	12-2-19 2 pmol +UV	12-2-19 2 pmol no UV	12-2-19 2 pmol +UV	01-15-20 2 pmol no UV	01-15-20 2 pmol +UV							12-2-19 2 pmol no UV	12-2-19 2 pmol +UV	12-2-19 2 pmol no UV	12-2-19 2 pmol +UV	01-15-20 2 pmol no UV	01-15-20 2 pmol +UV			no UV control	30 min UV
	1	40	36	20	19	33	20						1	120.301	108.271	74.3034	70.5882	117.097	70.9677			120.301	108.271
	2	44	52	35	24	30	28						2	132.331	156.391	130.031	89.1641	106.452	99.3548			132.331	156.391
	3	30	31	35	15		30						3	90.2256	93.2331	130.031	55.7276	0	106.452			90.2256	93.2331
	4	41	33	20	17	24	17						4	123.308	99.2481	74.3034	63.1579	85.1613	60.3226			123.308	99.2481
	5	38	43	35	27	31	30						5	114.286	129.323	130.031	100.31	110	106.452			114.286	129.323
	6	44	30	30	20	30	20						6	132.331	90.2256	111.455	74.3034	106.452	70.9677			132.331	90.2256
	7	18	16	39	17	29	30						7	54.1353	48.1203	144.892	63.1579	102.903	106.452			54.1353	48.1203
	8	30	35	26		23	18						8	90.2256	105.263	96.5944	0	81.6129	63.871			90.2256	105.263
	9	46		21	28	35	19						9	138.346	0	78.0186	104.025	124.194	67.4194			138.346	120.301
	10	30	40	23	20	23	30						10	90.2256	120.301	85.4489	74.3034	81.6129	106.452			90.2256	63.1579
	11	21	21	20	15	25	22						11	63.1579	63.1579	74.3034	55.7276	88.7097	78.0645			63.1579	102.256
	12	17	34	19	16	27	22						12	51.1278	102.256	70.5882	59.4427	95.8065	78.0645			51.1278	70.5882
	13												13	0	0	0	0	0	0			74.3034	89.1641
	14												14	0	0	0	0	0	0			130.031	55.7276
	15												15	0	0	0	0	0	0			130.031	63.1579
	16												16	0	0	0	0	0	0			74.3034	100.31
	17												17	0	0	0	0	0	0			130.031	74.3034
	18												18	0	0	0	0	0	0			111.455	63.1579
	19												19	0	0	0	0	0	0			144.892	104.025
	20												20	0	0	0	0	0	0			96.5944	74.3034
																						78.0186	55.7276
																						85.4489	59.4427
																						74.3034	70.9677
																						70.5882	99.3548
																						117.097	106.452
																						106.452	60.3226
																						85.1613	106.452
																						110	70.9677
																						106.452	106.452
																						102.903	63.871
																						81.6129	67.4194
																						124.194	106.452
																						81.6129	78.0645
																						88.7097	78.0645
																						95.8065
																						100	86.4863
																						4.23786	4.21037
																						35	34
