# Supplementary material for: Non-canonical Hedgehog signaling regulates spinal cord and muscle regeneration in Xenopus laevis larvae
Source: eLife. 2021 May 6;10:e61804. doi: 10.7554/eLife.61804 (PMC8137141; doi:10.7554/eLife.61804)
Supplement: Figure 5—source data 1. [file elife-61804-fig5-data1.xlsx]

## Sheet: 72h treatment
raw values	12/101 volume	8/25 DMSO	8/25 KT5720	12/19 DMSO	12/19 cyc	12/19 KT5720	12/19 KT + cyc	7-2-19 DMSO	7-2-19 cyc	7-2-19 KT5720	7-2-9 KT5720 + cyc				normalized to sample set matched control		8/25 DMSO	8/25 KT5720	12/19 DMSO	12/19 cyc	12/19 KT5720	12/19 KT + cyc	7-2-19 DMSO	7-2-19 cyc	7-2-19 KT5720	7-2-9 KT5720 + cyc		combined stats	DMSO	cyc	KT5720	KT+cyc
	1	302855	285698	392919	104141	213571	80853.4	1.05637e+06	196981	353167	58165.7					1	86.235	81.3497	90.4978	23.986	49.1901	18.6223	76.6092	14.2854	25.6122	4.21826			86.235	23.986	81.3497	18.6223
	2	369554	193594	429609	49986.7	174413	73270.8	1.25644e+06	158645	515579	106327					2	105.227	55.124	98.9481	11.513	40.1711	16.8758	91.1188	11.5051	37.3905	7.71097			105.227	11.513	55.124	16.8758
	3		193106	341969	91312.7					371846	131680					3	0	54.985	78.7628	21.0313	0	0	0	0	26.9668	9.54961			73.1158	21.0313	54.985	20.0738
	4	256781		522619	107899	236918		729009	177214	454176						4	73.1158	0	120.37	24.8514	54.5673	0	52.8687	12.8518	32.9375	0			118.606	24.8514	23.2052	24.6905
	5	416542	81496.1			319543	87155.5			608762	43787.1					5	118.606	23.2052	0	0	73.5976	20.0738	0	0	44.1483	3.1755			111.818	16.6209	82.6719	24.884
	6		290342	456236	72163.7		107200	1.01757e+06		379444	76048.6					6	0	82.6719	105.081	16.6209	0	24.6905	73.7954	0	27.5178	5.51515			92.3613	12.3028	101.878	20.5398
	7	392703	357792	406436	53415.9	110350	108040									7	111.818	101.878	93.6109	12.3028	25.416	24.884	0	0	0	0			168.705	21.1342	38.033	30.2755
	8		133571	492947	91759.4											8	0	38.033	113.536	21.1342	0	0	0	0	0	0			108.731	11.7813	27.9639	4.21826
	9	324371	98208.6	511446	51151.4	305684	89178.7									9	92.3613	27.9639	117.797	11.7813	70.4057	20.5398	0	0	0	0			101.334	10.1161	21.8688	7.71097
	10	592487	76802.8	353400	43921.8	299745	131449									10	168.705	21.8688	81.3957	10.1161	69.0376	30.2755	0	0	0	0			96.5786	14.2854	34.8916	9.54961
	11	381861	122539					2.0723e+06	134712	619265						11	108.731	34.8916	0	0	0	0	150.286	9.76947	44.91	0			52.0199	11.5051	34.3078	3.1755
	12	355881	120488					1.03104e+06	158122	559452	89639					12	101.334	34.3078	0	0	0	0	74.7725	11.4672	40.5723	6.50074			44.1944	12.8518	101.45	5.51515
	13	339182	356290					1.75256e+06		682078	78962.2					13	96.5786	101.45	0	0	0	0	127.098	0	49.4653	5.72645			141.074	9.76947	87.5902	6.50074
	14	182693						1.53029e+06		400675	75412.9					14	52.0199	0	0	0	0	0	110.979	0	29.0575	5.46905			90.4978	11.4672	48.1269	5.72645
	15	155210	307615					1.49319e+06		620983	28907.5					15	44.1944	87.5902	0	0	0	0	108.288	0	45.0346	2.09641			98.9481		49.1901	5.46905
	16	495450	169021					1.85026e+06		456754	71048.8					16	141.074	48.1269	0	0	0	0	134.184	0	33.1245	5.15256			78.7628		40.1711	2.09641
	17															17	0	0	0	0	0	0	0	0	0	0			120.37		54.5673	5.15256
	18															18	0	0	0	0	0	0	0	0	0	0			105.081		73.5976
	19															19	0	0	0	0	0	0	0	0	0	0			93.6109		25.416
	20															20	0	0	0	0	0	0	0	0	0	0			113.536		70.4057
																													117.797		69.0376
																													81.3957		25.6122
																													76.6092		37.3905
																													91.1188		26.9668
																													52.8687		32.9375
																													73.7954		44.1483
																													150.286		27.5178
																													74.7725		44.91
																													127.098		40.5723
																													110.979		49.4653
																													108.288		29.0575
																													134.184		45.0346
																															33.1245
																												average	100	15.2297	48.8657	12.4163
																												S ERROR	4.9247	1.41522	3.94839	2.20789
																												N	32	14	33	17
raw values	SC regen length	8/25 DMSO	8/25 KT5720	12/19 DMSO	12/19 cyc	12/19 KT5720	12/19 KT + cyc	7-2-19 DMSO	7-2-19 cyc	7-2-19 KT5720	7-2-9 KT5720 + cyc						8/25 DMSO	8/25 KT5720	12/19 DMSO	12/19 cyc	12/19 KT5720	12/19 KT + cyc	7-2-19 DMSO	7-2-19 cyc	7-2-19 KT5720	7-2-9 KT5720 + cyc			DMSO	cyc	KT5720	KT+cyc
	1		302.843		653.461	729.701	499.969	1082.8	828.09	627.95	451.046					1	0	49.8575	0	70.3017	78.5039	53.7885	99.45	76.0561	57.6742	41.4264			98.6932	70.3017	49.8575	53.7885
	2	599.481	368.973	975.624	899.747	604.519		1081.45		658.244	470.227					2	98.6932	60.7444	104.961	96.7981	65.0364	0	99.326	0	60.4565	43.1881			107.603	96.7981	60.7444	52.9657
	3	653.599	348.366	962.6	772.09		492.321	1020.63	1006.95	636.66	393.349					3	107.603	57.3519	103.56	83.0643	0	52.9657	93.74	92.4835	58.4742	36.1272			106.085	83.0643	57.3519	47.0343
	4	644.382	390.567	954.353	611.076	744.596	437.188	1047.21		553.81	416.281					4	106.085	64.2995	102.673	65.7418	80.1064	47.0343	96.1808	0	50.8648	38.2334			92.1906	65.7418	64.2995	44.2659
	5	559.983	184.362	995.438	720.801	749.008				579.16	513.763					5	92.1906	30.3517	107.093	77.5465	80.581	0	0	0	53.1931	47.1867			97.7214	77.5465	30.3517	47.186
	6	593.578	380.931	870.068	650.961	673.453	411.456	1047.73			499.163					6	97.7214	62.7131	93.6051	70.0328	72.4525	44.2659	96.229	0	0	45.8457			102.579	70.0328	62.7131	53.446
	7	623.087	316.903	906.635	749.976	639.385	438.598									7	102.579	52.1721	97.5391	80.6852	68.7874	47.186	0	0	0	0			108.19	80.6852	52.1721	52.9228
	8	657.169	261.542	934.515	904.976	598.617	496.786									8	108.19	43.0579	100.539	97.3606	64.4014	53.446	0	0	0	0			105.248	97.3606	43.0579	46.6617
	9	639.299	161.999	904.257	565.057	652.507	491.923									9	105.248	26.6701	97.2833	60.7909	70.1991	52.9228	0	0	0	0			122.359	60.7909	26.6701	41.4264
	10	743.229	327.855	862.093	739.674	737.337	433.725									10	122.359	53.9751	92.7471	79.5769	79.3254	46.6617	0	0	0	0			82.6292	79.5769	53.9751	43.1881
	11	501.905	226.821					1152	1013.63	643.15						11	82.6292	37.3418	0	0	0	0	105.806	93.097	59.0702	0			99.5557	76.0561	37.3418	36.1272
	12	604.72	432.713					1138.97	962.99	707.941	454.055					12	99.5557	71.238	0	0	0	0	104.609	88.446	65.021	41.7027			100.907	92.4835	71.238	38.2334
	13	612.928	412.473					1167.72	865.84	717.266	592.861					13	100.907	67.9059	0	0	0	0	107.249	79.5232	65.8774	54.4514			101.319	93.097	67.9059	47.1867
	14	615.431						1117.63	1137.18	565.755	451.429					14	101.319	0	0	0	0	0	102.649	104.445	51.9619	41.4616			71.9286	88.446	83.5554	45.8457
	15	436.908	507.531					1126.71		616.164						15	71.9286	83.5554	0	0	0	0	103.483	0	56.5917	0			102.99	79.5232	51.6102	41.7027
	16	625.581	313.49					993.83		604.36	410.616					16	102.99	51.6102	0	0	0	0	91.2785	0	55.5076	37.7131			104.961	104.445	55.0785	54.4514
	17		334.557													17	0	55.0785	0	0	0	0	0	0	0	0			103.56		71.3691	41.4616
	18		433.509													18	0	71.3691	0	0	0	0	0	0	0	0			102.673		78.5039	37.7131
	19															19	0	0	0	0	0	0	0	0	0	0			107.093		65.0364
	20															20	0	0	0	0	0	0	0	0	0	0			93.6051		80.1064
	21																												97.5391		80.581
	22																												100.539		72.4525
	23																												97.2833		68.7874
	24																												92.7471		64.4014
	25																												99.45		70.1991
																													99.326		79.3254
																													93.74		57.6742
																													96.1808		60.4565
																													96.229		58.4742
																													105.806		50.8648
																													104.609		53.1931
																													107.249		59.0702
																													102.649		65.021
																													103.483		65.8774
																													91.2785		51.9619
																															56.5917
																															55.5076
																													100	82.2468	60.3616	45.8671
																													1.40192	3.09338	2.15858	1.3831
																													35	16	37	18
raw values	muscle regen length	8/25 DMSO	8/25 KT5720	12/19 DMSO	12/19 cyc	12/19 KT5720	12/19 KT + cyc	7-2-19 DMSO	7-2-19 cyc	7-2-19 KT5720	7-2-9 KT5720 + cyc						8/25 DMSO	8/25 KT5720	12/19 DMSO	12/19 cyc	12/19 KT5720	12/19 KT + cyc	7-2-19 DMSO	7-2-19 cyc	7-2-19 KT5720	7-2-9 KT5720 + cyc			DMSO	cyc	KT5720	KT+cyc
	1	277.779	154.2	666.158	75.5298	406.614	78.6003	834.03	81.32	354.83	64.2982					1	77.0288	42.76	102.749	11.6498	62.7164	12.1234	102.76	10.0194	43.7183	7.92213			77.0288	11.6498	62.7164	12.1234
	2	377.188	188.35	704.247	77.1764	359.544	112.152	743.85	98.54	512.09	78.6802					2	104.595	52.2299	108.624	11.9037	55.4563	17.2984	91.6491	12.141	63.0942	9.69412			104.595	11.9037	55.4563	17.2984
	3	364.635	161.93	676.059	92.7353			772.86	65.96	391.09	48.9662					3	101.114	44.9036	104.276	14.3036	0	0	95.2234	8.12688	48.1859	6.03309			101.114	14.3036	70.192	14.4786
	4	392.182	217.55	641.211	124.723	455.081	93.8701	750.757		391.06	62.346					4	108.753	60.3271	98.9008	19.2374	70.192	14.4786	92.5001	0	48.1822	7.6816			108.753	19.2374	66.8212	12.7144
	5	393.962	163.42	698.656		433.227	82.4319			378.48	110.607					5	109.247	45.3167	107.761	0	66.8212	12.7144	0	0	46.6322	13.6278			109.247	18.8683	65.2076	10.4749
	6	364.073	205.77	682.596	122.33	422.765	67.9124	739.03		396.56	68.5496					6	100.958	57.0605	105.284	18.8683	65.2076	10.4749	91.0553	0	48.8598	8.44594			100.958	16.6546	47.4741	11.8134
	7	354.502	199.44	550.35	107.978	307.792										7	98.3042	55.3052	84.8864	16.6546	47.4741	0	0	0	0	0			98.3042	16.1106	58.6658	19.9166
	8	370.09	146.39	622.496	104.451	380.352	76.5907									8	102.627	40.5943	96.0142	16.1106	58.6658	11.8134	0	0	0	0			102.627	11.7925	63.216	12.743
	9	357.778	100.68	593.263	76.4551	409.853	129.127									9	99.2127	27.9188	91.5053	11.7925	63.216	19.9166	0	0	0	0			99.2127	15.0925	66.4615	7.92213
	10	423.677	212.95		97.8501	430.895	82.6174									10	117.487	59.0515	0	15.0925	66.4615	12.743	0	0	0	0			117.487	10.0194	43.7183	9.69412
	11	379.868	84.98					866.42	73.22	426.23						11	105.338	23.5651	0	0	0	0	106.751	9.02138	52.5154	0			105.338	12.141	63.0942	6.03309
	12	350.416	156.22					851.61	189.45		36.9892					12	97.1712	43.3202	0	0	0	0	104.926	23.342	0	4.55741			97.1712	8.12688	48.1859	7.6816
	13	360.529	260.11					904.67	172.37	460.527	62.4755					13	99.9755	72.1291	0	0	0	0	111.464	21.2376	56.7411	7.69755			99.9755	9.02138	48.1822	13.6278
	14	303.33						879.4	84.35	318.802	64.4102					14	84.1141	0	0	0	0	0	108.35	10.3927	39.2794	7.93593			84.1141	23.342	46.6322	8.44594
	15		339.22					847.69								15	0	94.0665	0	0	0	0	104.443	0	0	0			94.0748	21.2376	48.8598	4.55741
	16	339.25	169.57					737.59		475.84	78.4038					16	94.0748	47.0222	0	0	0	0	90.8779	0	58.6279	9.66007			102.749	10.3927	52.5154	7.69755
	17		173.04													17	0	47.9844	0	0	0	0	0	0	0	0			108.624		56.7411	7.93593
	18		218.1													18	0	60.4796	0	0	0	0	0	0	0	0			104.276		39.2794	9.66007
	19															19	0	0	0	0	0	0	0	0	0	0			98.9008		58.6279
	20															20	0	0	0	0	0	0	0	0	0	0			107.761		42.76
																													105.284		52.2299
																													84.8864		44.9036
																													96.0142		60.3271
																													91.5053		45.3167
																													102.76		57.0605
																													91.6491		55.3052
																													95.2234		40.5943
																													92.5001		27.9188
																													91.0553		59.0515
																													106.751		23.5651
																													104.926		43.3202
																													111.464		72.1291
																													108.35		94.0665
																													104.443		47.0222
																													90.8779		47.9844
																															60.4796
																													100	14.3684	53.7801	10.8232
																													1.44059	1.13245	2.15346	0.926687
																													35	16	36	18
raw values	Sox2 in regen SC	8/25 DMSO	8/25 KT5720	12/19 DMSO	12/19 cyc	12/19 KT5720	12/19 KT + cyc	7-2-19 DMSO	7-2-19 cyc	7-2-19 KT5720	7-2-9 KT5720 + cyc						8/25 DMSO	8/25 KT5720	12/19 DMSO	12/19 cyc	12/19 KT5720	12/19 KT + cyc	7-2-19 DMSO	7-2-19 cyc	7-2-19 KT5720	7-2-9 KT5720 + cyc			DMSO	cyc	KT5720	KT+cyc
	1	426	281		377			2282	736		484					1	87.423	57.6664	0	31.3318	0	0	104.877	33.8253	0	22.2438			87.423	31.3318	57.6664	27.0933
	2	487	384		663	855				1519						2	99.9414	78.8039	0	55.1008	71.0576	0	0	0	69.8105	0			99.9414	55.1008	78.8039	35.7365
	3	467	352		674	663			920		644					3	95.837	72.2369	0	56.015	55.1008	0	0	42.2816	0	29.5971			95.837	56.015	72.2369	44.0474
	4	402	356	1407		816		1861	858		735					4	82.4978	73.0578	116.933	0	67.8163	0	85.5283	39.4322	0	33.7793			82.4978	49.0339	73.0578	22.2438
	5	542	215		590					1310	468					5	111.228	44.122	0	49.0339	0	0	0	0	60.2053	21.5085			111.228	47.621	44.122	29.5971
	6		260		573	971	326	2023			1171					6	0	53.3568	0	47.621	80.6981	27.0933	92.9735	0	0	53.8171			91.3222	59.8379	53.3568	33.7793
	7	445	264	1103												7	91.3222	54.1777	91.6684	0	0	0	0	0	0	0			123.541	49.7818	54.1777	21.5085
	8	602	259		720	790										8	123.541	53.1516	0	59.8379	65.6555	0	0	0	0	0			114.512	33.8253	53.1516	53.8171
	9	558	204	1108	599		430									9	114.512	41.8646	92.0839	49.7818	0	35.7365	0	0	0	0			107.945	42.2816	41.8646	36.0313
	10	526	246	1195			530									10	107.945	50.4837	99.3144	0	0	44.0474	0	0	0	0			79.0091	39.4322	50.4837	33.7793
	11	385	231					2660		1238						11	79.0091	47.4055	0	0	0	0	122.249	0	56.8963	0			109.381	45.7744	47.4055	33.2278
	12	533	334					1966	996	1552	784					12	109.381	68.5429	0	0	0	0	90.3539	45.7744	71.3272	36.0313			99.1205	31.6652	68.5429
	13	483	391					2234	689							13	99.1205	80.2404	0	0	0	0	102.671	31.6652	0	0			89.6804		80.2404
	14	437						2165		1068	735					14	89.6804	0	0	0	0	0	99.4996	0	49.0834	33.7793			108.561		89.0648
	15		434					2082		1359						15	0	89.0648	0	0	0	0	95.685	0	62.4572	0			116.933		62.3864
	16	529	304					2310		1187	723					16	108.561	62.3864	0	0	0	0	106.164	0	54.5524	33.2278			91.6684		61.3603
	17		299													17	0	61.3603	0	0	0	0	0	0	0	0			92.0839		92.7587
	18		452													18	0	92.7587	0	0	0	0	0	0	0	0			99.3144		71.0576
	19															19	0	0	0	0	0	0	0	0	0	0			104.877		55.1008
	20															20	0	0	0	0	0	0	0	0	0	0			85.5283		67.8163
																													92.9735		80.6981
																													122.249		65.6555
																													90.3539		69.8105
																													102.671		60.2053
																													99.4996		56.8963
																													95.685		71.3272
																													106.164		49.0834
																															62.4572
																															54.5524
																													100	45.1417	63.6324	33.7147
																													2.25644	2.77678	2.41014	2.79926
																													27	12	29	11
		no staining	no staining														no staining	no staining
raw values	P-H3 in regen tail	8/25 DMSO	8/25 KT5720	12/19 DMSO	12/19 cyc	12/19 KT5720	12/19 KT + cyc	7-2-19 DMSO	7-2-19 cyc	7-2-19 KT5720	7-2-9 KT5720 + cyc						8/25 DMSO	8/25 KT5720	12/19 DMSO	12/19 cyc	12/19 KT5720	12/19 KT + cyc	7-2-19 DMSO	7-2-19 cyc	7-2-19 KT5720	7-2-9 KT5720 + cyc			DMSO	cyc	KT5720	KT+cyc
	1			103	78	133	68	253			51					1			61.4721	46.5517	79.3767	40.5836	121.264	0	0	24.4444			61.4721	46.5517	79.3767	40.5836
	2				58	126	53	215	219	114	43					2			0	34.6154	75.1989	31.6313	103.05	104.967	54.6405	20.61			99.0716	34.6154	75.1989	31.6313
	3			166	78			191	143	67	27					3			99.0716	46.5517	0	0	91.5468	68.5403	32.1133	12.9412			121.751	46.5517	97.878	27.4536
	4			204	18	164	46	194	97	77	105					4			121.751	10.7427	97.878	27.4536	92.9847	46.4924	36.9063	50.3268			75.7958	10.7427	76.3926	28.0504
	5			127	80	128				76	32					5			75.7958	47.7454	76.3926	0	0	0	36.427	15.3377			104.443	47.7454	96.6844	39.9867
	6			175	78	162		191		60						6			104.443	46.5517	96.6844	0	91.5468	0	28.7582	0			94.2971	46.5517	93.1034	19.695
	7			158	50	156	47									7			94.2971	29.8408	93.1034	28.0504	0	0	0	0			111.605	29.8408	132.493	39.9867
	8			187	78	222	67									8			111.605	46.5517	132.493	39.9867	0	0	0	0			116.976	46.5517	100.862	24.4444
	9			196		169	33									9			116.976	0	100.862	19.695	0	0	0	0			114.589	43.5676	97.878	20.61
	10			192	73	164	67									10			114.589	43.5676	97.878	39.9867	0	0	0	0			121.264	104.967	54.6405	12.9412
	11							230	143	97						11			0	0	0	0	110.24	68.5403	46.4924	0			103.05	68.5403	32.1133	50.3268
	12							203	134	150	34					12			0	0	0	0	97.2985	64.2266	71.8954	16.2963			91.5468	46.4924	36.9063	15.3377
	13							216	87	157	47					13			0	0	0	0	103.529	41.6993	75.2505	22.5272			92.9847	68.5403	36.427	16.2963
	14							174	104	62	35					14			0	0	0	0	83.3987	49.8475	29.7168	16.7756			91.5468	64.2266	28.7582	22.5272
	15							234		67	27					15			0	0	0	0	112.157	0	32.1133	12.9412			110.24	41.6993	46.4924	16.7756
	16							194		90	12					16			0	0	0	0	92.9847	0	43.1373	5.75163			97.2985	49.8475	71.8954	12.9412
	17															17			0	0	0	0	0	0	0	0			103.529		75.2505	5.75163
	18															18			0	0	0	0	0	0	0	0			83.3987		29.7168
	19															19			0	0	0	0	0	0	0	0			112.157		32.1133
	20															20			0	0	0	0	0	0	0	0			92.9847		43.1373
																													100	49.8145	66.8659	25.02
																													3.4347	5.11134	6.80083	2.93603
																													20	16	20	17
