# Supplementary material for: Non-canonical Hedgehog signaling regulates spinal cord and muscle regeneration in Xenopus laevis larvae
Source: eLife. 2021 May 6;10:e61804. doi: 10.7554/eLife.61804 (PMC8137141; doi:10.7554/eLife.61804)
Supplement: Figure 6—source data 1. [file elife-61804-fig6-data1.xlsx]

## Sheet: P-CREB+ per Sox2 by bin control
	P-CREB per Sox2 in bin					between _ and _	-300	-200	-100	0	100	200	300			P-CREB per Sox2 in bin					between _ and _	-300	-200	-100	0	100	200	300			P-CREB per Sox2 in bin					between _ and _	-300	-200	-100	0	100	200	300			P-CREB per Sox2 in bin
	sample set number	data set	hpa	treatment	sample	image #	-200	-100	0	100	200	300	400			sample set number	data set	hpa	treatment	sample	image #	-200	-100	0	100	200	300	400			sample set number	data set	hpa	treatment	sample	image #	-200	-100	0	100	200	300	400			sample set number	data set	hpa	treatment
		10/23	0	control	7	1				0.36036	0.529851	0.408333	0.552381				9/20	4	control	3	1			0.791667	0.49	0.164706	0.142857	0.0666667				9/20	12	control	1	1		0.928571	0.768362	0.516129	0.357143	0.375	0.578947				9/20	24	control
		10/23	0	control	10	1				0.637168	0.526316	0.529412	0.179775				10/3	4	control	1	1			1.47619	0.226891	0.166667	0.21374	0.118812				9/20	12	control	4	1		1.6	1.07767	0.833333	0.292683	0.304348					9/20	24	control
		10/23	0	control	14	1				0.642857	0.395062	0.488636	0.506024				10/3	4	control	3	1			1	0.480315	0.243902	0.186916	0.0833333				9/20	12	control	7	1			0.773684	0.673267	0.431818	0.515625	0.423077				9/20	24	control
		10/23	0	control	17	1				0.367188	0.470588	0.203704	0.363636				10/3	4	control	6	1			1.68421	0.470588	0.28	0.366337	0.530864				9/20	12	control	9	1		1	0.96648	0.734177	0.488372	0.44	0.395833				9/20	24	control
		10/23	0	control	18	1				0.447368	0.575758	0.340426	0.155556				10/3	4	control	7	1			0.905263	1.13281	0.589474	0.397727	0.315789				9/20	12	control	10	1		0.786667	0.640719	0.673913	0.746835	0.368421	0.364865				9/20	24	control
		2020-11-23	0	control	1	1				0.448598	0.5	0.625	0.4				10/3	4	control	11	1			1.27941	0.962264	0.474359	0.458333	0.609756				2020-11-23	12	control	2	1			0.876923	0.521127	0.442308	0.403509	0.236364				9/20	24	control
		2020-11-23	0	control	4	1				0.690476	0.457143	0.5	0.583333				2020-11-23	4	control	1	1			1.625	1.02703	0.777778	0.534884	0.842105				2020-11-23	12	control	3	1			1.02632	0.955882	0.176471	0.131148	0.212121				2020-11-23	24	control
		2020-11-23	0	control	5	1				0.756757	0.692308	0.574074	0.345455				2020-11-23	4	control	2	1			2.18519	1.8254	0.513514	0.614458	0.577465				2020-11-23	12	control	5	1			1	0.898876	0.380952	0.31746	0.205882				2020-11-23	24	control
		2020-11-23	0	control	6	1				1.04545	0.916667	1.08333	1.29412				2020-11-23	4	control	3	1			1.9375	1.2027	0.460317	0.607143	0.638889				2020-11-23	12	control	6	1			1.11494	1.05455	0.416667	0.333333	0.191489				2020-11-23	24	control
		2020-11-23	0	control	8	1				0.649485	0.6	0.662651	0.871429				2020-11-23	4	control	6	1			2.26316	1.45	0.384615	0.388889	0.324675				2020-11-23	12	control	7	1			1.0375	0.436782	0.5	0.490196	0.435484				2020-11-23	24	control
		2020-12-02	0	control	1	1				0.637681	0.548387	0.666667	0.860465				2020-12-02	4	control	1	1			2.12	0.807229	0.618421	0.486842	0.347826				2020-12-02	12	control	1	1			1.34375	0.67619	0.450549	0.391304	0.436364				2020-11-23	24	control
		2020-12-02	0	control	2	1				0.540984	0.553846	0.377049	0.197183				2020-12-02	4	control	2	1			1.27273	0.758929	0.393258	0.299065	0.388889				2020-12-02	12	control	2	1			1.28421	0.614458	0.531915	0.531915	0.393617				2020-11-23	24	control
		2020-12-02	0	control	3	1				0.533333	0.506024	0.578313	0.626866				2020-12-02	4	control	3	1			1.38095	0.505376	0.301075	0.222222	0.266667				2020-12-02	12	control	3	1			1.18	0.831325	0.555556	0.410256	0.241379				2020-12-02	24	control
		2020-12-02	0	control	4	1				0.8	0.6875	0.608108	0.580645				2020-12-02	4	control	4	1			1.875	0.724638	0.141026	0.209677					2020-12-02	12	control	4	1			1.47959	0.769231	0.426667	0.547945	0.530612				2020-12-02	24	control
		2020-12-02	0	control	5	1				0.460526	0.689189	0.528571	0.551724				2020-12-02	4	control	6	1			1.45833	1.11957	0.583333	0.420455	0.367347				2020-12-02	12	control	5	1			1.33803	0.643836	0.426471	0.315789					2020-12-02	24	control
		2020-12-02	0	control	6	1				0.62069	0.648148	0.64	0.530612				2020-12-02	4	control	7	1				1.09231	0.216495	0.181818					2020-12-02	12	control	6	1			1.28037	0.470588	0.492308	0.537037	0.4				2020-12-02	24	control
		2020-12-02	0	control	7	1				0.8	0.689189	0.783784	0.671233				2020-08-12	4	control	1	1				0.75	0.0943396	0.137097	0.140187				2020-12-02	12	control	7	1			0.793103	0.641975	0.146667	0.180723	0.191489				2020-12-02	24	control
		2020-12-02	0	control	8	1				0.505747	0.373333	0.428571	0.347826				2020-08-12	4	control	2	1				0.291667	0.142857	0.151515	0.0483871				2020-08-12	12	control	2	1			0.968254	0.818182	0.293578	0.301205	0.262136				2020-12-02	24	control
		2020-12-02	0	control	9	1				0.649123	0.666667	0.438776	0.554217				2020-08-12	4	control	3	1				1.1236	0.415094	0.181818	0.204969				2020-08-12	12	control	3	1			0.669903	0.382979	0.122807	0.0882353	0.133929				2020-08-12	24	control
		2020-12-02	0	control	10	1				0.362637	0.421687	0.478261	0.336634				2020-08-12	4	control	4	1				0.532374	0.234848	0.286713	0.205882				2020-08-12	12	control	6	1			0.973684	0.692308	0.41573	0.377778	0.393617				2020-08-12	24	control
		2020-08-12	0	control	1	1				0.213483	0.166667	0.168539	0.131579				2020-08-12	4	control	5	1			0.315789	0.328889	0.178947	0.142012	0.141892				2020-08-12	12	control	9	1			0.779412	0.62037	0.181818	0.122642	0.150943				2020-08-12	24	control
		2020-08-12	0	control	2	1				0.4	0.358974	0.211765	0.3125				2020-08-12	4	control	7	1				0.731481	0.232143	0.206897	0.16092				2020-10-07	12	control	2	1			1.10714	0.95	0.929577	0.941176	1.02439				2020-08-12	24	control
		2020-08-12	0	control	4	1				0.26738	0.178295	0.185841	0.157303				2020-08-12	4	control	8	1				0.782609	0.267241	0.274725	0.168142				2020-10-07	12	control	3	1			1.33735	1.18182	0.732143	0.477273	1.02564				2020-08-12	24	control
		2020-08-12	0	control	5	1				0.157609	0.161765	0.113475	0.131387				2020-10-07	4	control	1	1			1.17778	0.391304	0.301587	0.294643	0.196262				2020-10-07	12	control	5	1			1.42647	1.54762	0.672727	0.717391	0.804878				2020-08-12	24	control
		2020-08-12	0	control	7	1				0.368984	0.384146	0.26	0.269504				2020-10-07	4	control	2	1			1.475	0.586538	0.27193	0.22449	0.161905				2020-10-07	12	control	6	1			1.40964	1.625	1.42857	0.943396	1.3125				2020-10-07	24	control
		2020-08-12	0	control	8	1				0.508621	0.510204	0.387324	0.510417				2020-10-07	4	control	3	1			1.4	0.522727	0.344444	0.361446	0.393939				2020-10-07	12	control	7	1			1.50427	1.54412	1.08197	1.04	1.05714				2020-10-07	24	control
		2020-08-12	0	control	9	1				0.223881	0.194175	0.0841121	0.144231				2020-10-07	4	control	4	1			1.08475	0.669811	0.490196	0.401961	0.412371				2020-10-07	12	control	9	1			1.30303	1.12048	0.861111	0.789474	0.666667				2020-10-07	24	control
		2020-08-12	0	control	11	1				0.40099	0.296296	0.377778	0.172131				2020-10-07	4	control	5	1			1.21622	0.488889	0.328947	0.285714	0.235294																			2020-10-07	24	control
		2020-08-12	0	control	12	1				0.362162	0.279661	0.189394	0.165138				2020-10-07	4	control	6	1			1.51724	0.764151	0.411111	0.4	0.333333																			2020-10-07	24	control
		2020-10-07	0	control	1	1				0.806122	0.56383	0.764706	0.953488				2020-10-07	4	control	7	1			1.27273	0.704082	0.41573	0.344444	0.416667
		2020-10-07	0	control	2	1				0.972727	0.858407	1.0989	1.1				2020-10-07	4	control	8	1			1.27027	0.734177	0.409639	0.361446	0.468354
		2020-10-07	0	control	3	1				0.627273	0.593023	0.467391	0.257426
		2020-10-07	0	control	4	1				0.651163	0.698925	0.481928	0.444444
		2020-10-07	0	control	5	1				0.933333	0.732143	0.591549	0.590909
		2020-10-07	0	control	6	1				1.05618	0.716418	0.705882	0.492537
		2020-10-07	0	control	7	1				0.761194	0.556522	0.521368	0.478723
		2020-10-07	0	control	8	1				0.5	0.569767	0.513158	0.382022
		2020-10-07	0	control	9	1				0.64	0.650943	0.553398	0.295775
						average	#DIV/0!	#DIV/0!	#DIV/0!	0.573882	0.524153	0.490005	0.46049								average	#DIV/0!	#DIV/0!	1.41602	0.763817	0.349935	0.315687	0.316124								average	#DIV/0!	1.07881	1.09114	0.830686	0.517904	0.458984	0.482775
						S ERROR	#DIV/0!	#DIV/0!	#DIV/0!	0.0365892	0.0299562	0.0373157	0.0449294								S ERROR	#DIV/0!	#DIV/0!	0.092718	0.0637825	0.0291125	0.0241646	0.0358797								S ERROR	#DIV/0!	0.179297	0.0495669	0.0641962	0.0570477	0.0474032	0.0648943
[truncated: 27 more columns]
