# Supplementary material for: Non-canonical Hedgehog signaling regulates spinal cord and muscle regeneration in Xenopus laevis larvae
Source: eLife. 2021 May 6;10:e61804. doi: 10.7554/eLife.61804 (PMC8137141; doi:10.7554/eLife.61804)
Supplement: Figure 7—source data 1. [file elife-61804-fig7-data1.xlsx]

## Sheet: Sheet1
% pCREB+/100 um long SC in the first 400 um anterior to amputation at 4 hpa
DMSO	Cyclopamine	SAG
112.903	72.5806	145.441
83.0645	28.2258	59.2784
97.7823	13.2193	175.258
94.086	26.8041	247.423
49.5874	25.7732	262.887
41.2371	30.9278
112.903
185.567
123.711
100.094	32.9218	178.057
42.6293	20.3743	82.4434
14.2098	8.31779	36.8698
	0.0265	0.0265	1-way ANOVA+Holm-Sidak's multiple comparison (cyclopa vs DMSO; SAG vs DMSO)
		0.0006	SAG vs cyclopa
