# Supplementary material for: Non-canonical Hedgehog signaling regulates spinal cord and muscle regeneration in Xenopus laevis larvae
Source: eLife. 2021 May 6;10:e61804. doi: 10.7554/eLife.61804 (PMC8137141; doi:10.7554/eLife.61804)
Supplement: Figure 7—source data 2. [file elife-61804-fig7-data2.xlsx]

## Sheet: P-CREB count Whole mount
	data set	hpa	treatment	sample	P-CREB # in regenerate	% of matched control treatment		data set	hpa	treatment	sample	P-CREB # in regenerate	% of matched control treatment		data set	hpa	treatment	sample	P-CREB # in regenerate	% of matched control treatment
	2020-08-12	24	control	1	114	113.433		2020-10-07	24	cyc	1	127	54.2735		2020-08-12	24	SAG	1	132	131.343
	2020-08-12	24	control	2	66	65.6716		2020-10-07	24	cyc	2	192	82.0513		2020-08-12	24	SAG	3	132	131.343
	2020-08-12	24	control	4	104	103.483		2020-10-07	24	cyc	3	129	55.1282		2020-08-12	24	SAG	4	241
	2020-08-12	24	control	5	71	70.6468		2020-10-07	24	cyc	4	180	76.9231		2020-08-12	24	SAG	5	226	224.876
	2020-08-12	24	control	6	81	80.597		2020-10-07	24	cyc	5	248	105.983		2020-08-12	24	SAG	6	125	124.378
	2020-08-12	24	control	8	167			2020-10-07	24	cyc	6	178	76.0684		2020-08-12	24	SAG	7	198	197.015
	2020-10-07	24	control	2	223	95.2991		2020-11-23	24	cyc	1	118	85.7143		2020-10-07	24	SAG	1	263	112.393
	2020-10-07	24	control	3	194	82.906		2020-11-23	24	cyc	3	103	74.8184		2020-10-07	24	SAG	2	230	98.2906
	2020-10-07	24	control	5	198	84.6154		2020-11-23	24	cyc	4	121	87.8935		2020-10-07	24	SAG	3	251	107.265
	2020-10-07	24	control	6	262	111.966		2020-11-23	24	cyc	5	54	39.2252		2020-10-07	24	SAG	4	255	108.974
	2020-10-07	24	control	1	293	125.214		2020-11-23	24	cyc	6	189			2020-10-07	24	SAG	5	230	98.2906
	2020-11-23	24	control	1	154	111.864		2020-12-02	24	cyc	1	141	125.893		2020-10-07	24	SAG	7	260	111.111
	2020-11-23	24	control	2	96	69.7337		2020-12-02	24	cyc	2	54	48.2143		2020-10-07	24	SAG	8	316	135.043
	2020-11-23	24	control	3	163	118.402		2020-12-02	24	cyc	4	83	74.1071		2020-11-23	24	SAG	1	181	131.477
	2020-11-23	24	control	4	158	114.77		2020-12-02	24	cyc	5	95	84.8214		2020-11-23	24	SAG	2	212	153.995
	2020-11-23	24	control	6	119	86.4407		2020-12-02	24	cyc	6	125	111.607		2020-11-23	24	SAG	3	147	106.78
	2020-11-23	24	control	7	136	98.7893		2020-12-02	24	cyc	7	129	115.179		2020-11-23	24	SAG	4	140	101.695
	2020-12-02	24	control	1	158	141.071									2020-11-23	24	SAG	5	137	99.5157
	2020-12-02	24	control	2	70	62.5									2020-11-23	24	SAG	6	226	164.165
	2020-12-02	24	control	4	70	62.5									2020-11-23	24	SAG	7	137	99.5157
	2020-12-02	24	control	5	102	91.0714
	2020-12-02	24	control	6	149	133.036
	2020-12-02	24	control	7	123	109.821
					average	96.9923						average	81.1188						average	128.288
					S ERROR	4.94686						S ERROR	6.17794						S ERROR	8.03468
