# Supplementary material for: Non-canonical Hedgehog signaling regulates spinal cord and muscle regeneration in Xenopus laevis larvae
Source: eLife. 2021 May 6;10:e61804. doi: 10.7554/eLife.61804 (PMC8137141; doi:10.7554/eLife.61804)
Supplement: Figure 8—source data 1. [file elife-61804-fig8-data1.xlsx]

## Sheet: SC vs Muscle outgrowth
	SC regen L	6-2-14 DMSO 24 hrs	6-2-14 cyc 24 hrs	6-2-14 cyc 72 hrs	12-19-18 DMSO 24 hrs	12-19-18 cyc 24 hrs	12-19-18 cyc 72 hrs	3-11-19 DMSO 24 hrs	3-11-19 cyc 24 hrs	3-11-19 cyc 72 hrs	5-13-19 DMSO 24 hrs	5-13-19 cyc 24 hrs	5-13-19 cyc 72 hrs			muscle regen L	6-2-14 DMSO 24 hrs	6-2-14 cyc 24 hrs	6-2-14 cyc 72 hrs	12-19-18 DMSO 24 hrs	12-19-18 cyc 24 hrs	12-19-18 cyc 72 hrs	3-11-19 DMSO 24 hrs	3-11-19 cyc 24 hrs	3-11-19 cyc 72 hrs	5-13-19 DMSO 24 hrs	5-13-19 cyc 24 hrs	5-13-19 cyc 72 hrs
	1	639.609	477.421	590.901	1032.99	937.024	653.461	983.74	886.686	926.592	838.921	637.324	598.978			1	342.446	52.4996	107.667	700.146	145.08	75.5298	653.978	339.757	216.874	578.951	360.656
	2		541.927	541.032	976.418	839.764	899.747	782.017	857.624	872.468	762.656	669.25	550.576			2	324.779	92.0026	98.8526	660.692	252.514	77.1764	616.689	347.074	86.6246	470.155	325.937	72.6146
	3	575.079		591.666	862.656	952.43	772.09	670.236	986.405		862.884	754.64	618.487			3	359.188	89.8649	69.8373	582.985		92.7353			103.871	598.07	352.26	49.4599
	4	707.761	512.592		714.824	624.143	611.076	1112.09	964.721	795.984		616.108	549.515			4	341.584	93.7576	117.328		107.8	124.723	802.808	210.486		394.256	356.201	62.9132
	5	677.972	572.51	537.176	902.224	720.862	720.801	837.175	901.687	903.413	800.765	744.812	696.298			5	329.098	46.1865	123.624	639.994	72.5556		566.631	309.62	99.7414	502.686		52.4465
	6	654.05	446.89	556.048	780.996	807.251	650.961		800.841	834.755	745.35	760.41	543.797			6	316.915	91.6438	103.129	490.409	148.287	122.33		463.553		422.101	366.239	73.1795
	7	640.382	589.515	543.887	961.354	508.832	749.976	689.123	814.983	862.079	822.135	736.669	666.728			7	339.585	84.8411	76.1588	618.675	64.7214	107.978	475.253	304.924	144.988	532.369	308.125	36.3073
	8	562.545	517.163	618.339	811.99	804.769	904.976	949.475	895.632	927.285	770.318		679.953			8	305.886		85.3786	554.492	81.3277	104.451	786.111	425.719	66.6221	483.635	369.998	76.9158
	9	681.411	587.247	569.413	999.102	608.71	565.057	765.366	898.362	931.49	661.986	728.434				9		99.961	87.2584	582.719	167.205	76.4551	533.124	386.862	64.7095	370.843	348.59
	10					579.514	739.674	747.017	870.081	897.746						10				212.237	100.15	97.8501	578.475	452.047	183.774
	11							1018.31								11							696.988	479.44
	12							977.943								12							718.205
	13							1086.57								13							786.809
	14							932.058								14							751.566
	15							1035.08								15							784.058
	16							897.921								16							618.597
	17							915.811								17							606.416
	18							851.896								18							575.439
control	sample	SC outgrowth	muscle outgrowth	N =	24 hrs cyc	sample	SC outgrowth	muscle outgrowth		72 hrs cyc	sample	SC outgrowth	muscle outgrowth
6-2-14 DMSO 24 hrs	1	639.609	342.446	39	6-2-14 cyc 24 hrs	1	477.421	52.4996		6-2-14 cyc 72 hrs	1	590.901	107.667
	2		324.779			2	541.927	92.0026			2	541.032	98.8526
	3	575.079	359.188			3		89.8649			3	591.666	69.8373
	4	707.761	341.584			4	512.592	93.7576			4		117.328
	5	677.972	329.098			5	572.51	46.1865			5	537.176	123.624
	6	654.05	316.915			6	446.89	91.6438			6	556.048	103.129
	7	640.382	339.585			7	589.515	84.8411			7	543.887	76.1588
	8	562.545	305.886			8	517.163				8	618.339	85.3786
	9	681.411				9	587.247	99.961			9	569.413	87.2584
12-19-18 DMSO 24 hrs	1	1032.99	700.146		12-19-18 cyc 24 hrs	1	937.024	145.08		12-19-18 cyc 72 hrs	1	653.461	75.5298
	2	976.418	660.692			2	839.764	252.514			2	899.747	77.1764
	3	862.656	582.985			3	952.43				3	772.09	92.7353
	4	714.824				4	624.143	107.8			4	611.076	124.723
	5	902.224	639.994			5	720.862	72.5556			5	720.801
	6	780.996	490.409			6	807.251	148.287			6	650.961	122.33
	7	961.354	618.675			7	508.832	64.7214			7	749.976	107.978
	8	811.99	554.492			8	804.769	81.3277			8	904.976	104.451
	9	999.102	582.719			9	608.71	167.205			9	565.057	76.4551
3-11-19 DMSO 24 hrs	1	983.74	653.978			10	579.514	100.15			10	739.674	97.8501
	2	782.017	616.689		3-11-19 cyc 24 hrs	1	886.686	339.757		3-11-19 cyc 72 hrs	1	926.592	216.874
	3	670.236				2	857.624	347.074			2	872.468	86.6246
	4	1112.09	802.808			3	986.405				3		103.871
	5	837.175	566.631			4	964.721	210.486			4	795.984
	6					5	901.687	309.62			5	903.413	99.7414
	7	689.123	475.253			6	800.841	463.553			6	834.755
	8	949.475	786.111			7	814.983	304.924			7	862.079	144.988
	9	765.366	533.124			8	895.632	425.719			8	927.285	66.6221
	10	747.017	578.475			9	898.362	386.862			9	931.49	64.7095
	11	1018.31	696.988			10	870.081	452.047			10	897.746	183.774
	12	977.943	718.205		5-13-19 cyc 24 hrs	1	637.324	360.656		5-13-19 cyc 72 hrs	1	598.978
	13	1086.57	786.809			2	669.25	325.937			2	550.576	72.6146
	14	932.058	751.566			3	754.64	352.26			3	618.487	49.4599
	15	1035.08	784.058			4	616.108	356.201			4	549.515	62.9132
	16	897.921	618.597			5	744.812				5	696.298	52.4465
	17	915.811	606.416			6	760.41	366.239			6	543.797	73.1795
	18	851.896	575.439			7	736.669	308.125			7	666.728	36.3073
5-13-19 DMSO 24 hrs	1	838.921	578.951			8		369.998			8	679.953	76.9158
	2	762.656	470.155			9	728.434	348.59
	3	862.884	598.07
	4		394.256
	5	800.765	502.686
	6	745.35	422.101
	7	822.135	532.369
	8	770.318	483.635
	9	661.986	370.843
6-2-14 DMSO 24 hrs	1	639.609	342.446
	2		324.779
	3	575.079	359.188
	4	707.761	341.584
	5	677.972	329.098
	6	654.05	316.915
	7	640.382	339.585
	8	562.545	305.886
	9	681.411
5-13-19 DMSO 24 hrs	1	838.921	578.951
	2	762.656	470.155
	3	862.884	598.07
	4		394.256
	5	800.765	502.686
	6	745.35	422.101
	7	822.135	532.369
	8	770.318	483.635
	9	661.986	370.843
B 8/5/2019 DMSO	1	944.145	577.016
	2	966.763	630.244
	3	927.864	634.817
	4	941.518	580.226
	5	939.49	624.986
B 8/6/2019 DMSO	1	981.489
	2	968.463	715.523
	3	810.815	514.8
	4	840.025	586.637
	5		506.967
	6	910.199	627.975
	7	956.247	597.083
	SC regen L	6-2-14 DMSO 24 hrs	6-2-14 SAG 24 hrs	6-2-14 SAG 72 hrs	5-13-19 DMSO 24 hrs	5-13-19 SAG 24 hrs	5-13-19 SAG 72 hrs	B 8/5/2019 DMSO	B 8/5/2019 24 hrs SAG	B 8/5/2019 72 hrs SAG	B 8/6/2019 DMSO	B 8/6/2019 24 hrs SAG	B 8/6/2019 72 hrs SAG			muscle regen L	6-2-14 DMSO 24 hrs	6-2-14 SAG 24 hrs	6-2-14 SAG 72 hrs	5-13-19 DMSO 24 hrs	5-13-19 SAG 24 hrs	5-13-19 SAG 72 hrs	B 8/5/2019 DMSO	B 8/5/2019 24 hrs SAG	B 8/5/2019 72 hrs SAG	B 8/6/2019 DMSO	B 8/6/2019 24 hrs SAG	B 8/6/2019 72 hrs SAG
	1	639.609	267.633	298.48	838.921	465.887	643.609	944.145	688.683	529.8	981.489	436.413	372.144			1	342.446	227.851	207.311	578.951	476.383	375.031	577.016	401.132	418.838		485.373	384.907
	2		505.826	386.493	762.656	403.385	425.064	966.763	561.865	450.69	968.463	729.246	718.547			2	324.779	431.909	277.79	470.155	471.511	504.204	630.244	479.874	352.061	715.523	392.454	481.968
	3	575.079	537.072	339.794	862.884	226.347	643.894	927.864	535.053	551.592	810.815	699.13	499.645			3	359.188	343.668	265.931	598.07		459.73	634.817	397.848	384.926	514.8		417.632
	4	707.761	415.831	422.502		557.564	448.438	941.518	498.803	296.159	840.025	584.883	355.407			4	341.584	418.943	202.567	394.256	327.213	473.205	580.226	333.104	397.486	586.637	450.007	474.457
	5	677.972	329.216	396.497	800.765			939.49		265.004		671.038	467.267			5	329.098	324.103	234.917	502.686	426.362	396.878	624.986	370.206	419.067	506.967	456.094	453.881
	6	654.05	170.165	239.664	745.35	729.686	533.762		507.244	664.707	910.199	658.818	499.201			6	316.915	225.779		422.101	414.887			437.95	403.71	627.975	393.789
	7	640.382	208.08		822.135	476.384				607.026	956.247	594.392	706.843			7	339.585	282.061	279.316	532.369	524.854				393.7	597.083	408.67	424.795
	8	562.545	363.448	359.752	770.318	448.883	389.669					660.228				8	305.886	275.236	259.646	483.635	372.691	415.56					408.545
	9	681.411		370.868	661.986		481.257									9			252.279	370.843		490.97
	10
	11
	12
	13
	14
	15
	16
	17
	18
	19
	20
	21
	22
	23
	24
	25
control	sample	SC outgrowth	muscle outgrowth	N =	24 hrs SAG	sample	SC outgrowth	muscle outgrowth	N =	72 hrs SAG	sample	SC outgrowth	muscle outgrowth	N =
6-2-14 DMSO 24 hrs	1	639.609	342.446	25	6-2-14 SAG 24 hrs	1	267.633	227.851	26	6-2-14 SAG 72 hrs	1	298.48	207.311	26
	2		324.779			2	505.826	431.909			2	386.493	277.79
	3	575.079	359.188			3	537.072	343.668			3	339.794	265.931
	4	707.761	341.584			4	415.831	418.943			4	422.502	202.567
	5	677.972	329.098			5	329.216	324.103			5	396.497	234.917
	6	654.05	316.915			6	170.165	225.779			6	239.664
	7	640.382	339.585			7	208.08	282.061			7		279.316
	8	562.545	305.886			8	363.448	275.236			8	359.752	259.646
	9	681.411			5-13-19 SAG 24 hrs	1	465.887	476.383			9	370.868	252.279
5-13-19 DMSO 24 hrs	1	838.921	578.951			2	403.385	471.511		5-13-19 SAG 72 hrs	1	643.609	375.031
	2	762.656	470.155			3	226.347				2	425.064	504.204
	3	862.884	598.07			4	557.564	327.213			3	643.894	459.73
	4		394.256			5		426.362			4	448.438	473.205
	5	800.765	502.686			6	729.686	414.887			5		396.878
	6	745.35	422.101			7	476.384	524.854			6	533.762
	7	822.135	532.369			8	448.883	372.691			7
	8	770.318	483.635		B 8/5/2019 24 hrs SAG	1	688.683	401.132			8	389.669	415.56
	9	661.986	370.843			2	561.865	479.874			9	481.257	490.97
B 8/5/2019 DMSO	1	944.145	577.016			3	535.053	397.848		B 8/5/2019 72 hrs SAG	1	529.8	418.838
	2	966.763	630.244			4	498.803	333.104			2	450.69	352.061
	3	927.864	634.817			5		370.206			3	551.592	384.926
	4	941.518	580.226			6	507.244	437.95			4	296.159	397.486
	5	939.49	624.986		B 8/6/2019 24 hrs SAG	1	436.413	485.373			5	265.004	419.067
B 8/6/2019 DMSO	1	981.489				2	729.246	392.454			6	664.707	403.71
	2	968.463	715.523			3	699.13				7	607.026	393.7
	3	810.815	514.8			4	584.883	450.007		B 8/6/2019 72 hrs SAG	1	372.144	384.907
	4	840.025	586.637			5	671.038	456.094			2	718.547	481.968
	5		506.967			6	658.818	393.789			3	499.645	417.632
	6	910.199	627.975			7	594.392	408.67			4	355.407	474.457
	7	956.247	597.083			8	660.228	408.545			5	467.267	453.881
											6	499.201
											7	706.843	424.795
	SC regen L	7/27 DMSO ctrl	7/27 10 µM cyc	7/27 10 µM GANT61	7/27 cyc + GANT61	8/25 DMSO ctrl	8/25 10 µM cyc	8/25 10 µM GANT61	8/25 cyc + GANT61		muscle regen L	7/27 DMSO ctrl	7/27 10 µM cyc	7/27 10 µM GANT61	7/27 cyc + GANT61	8/25 DMSO ctrl	8/25 10 µM cyc	8/25 10 µM GANT61	8/25 cyc + GANT61
	1		799.07	983.942	787.957	789.101	688.939	713.706			1		116.46	761.083	158.102	391.13	110.354	476.671	91.04
	2	906.072	773.053	1114.62		764.968	720.703	745.467	672.335		2		170.559	827.514	74.6834	402.146	120.112	473.218	64.4268
	3	967.717	802.492	951.355	662.472	816.135	736.114	682.573	677.615		3	628.464		643.971	153.268		138.951	431.685	81.2207
	4	1129.27	713.984		774.134	750.438	681.445	643.973	683.173		4	898.302	97.5918		178.428	467.357	90.0036	531.882	66.2716
	5	1236.78	799.867	883.838	848.942	675.419	669.233	755.389	750.538		5	963.762	109.679	638.842	135.102	519.438	89.3012	419.308	90.08
	6	1010.05	629.34	946.247	834.527	846.099	713.513	733.936	673.814		6	834.43	114.886	637.402	99.8046	516.817	103.865
	7	964.741		1136.18	846.905	815.485	726.103	691.653	696.535		7	703.292	99.9918	726.592	145.111	378.458	106.384	427.237	78.7234
	8	1000.92	931.314	1024.36	680.033	791.014		690.365	709.048		8	769.202	108.709	663.272	92.7263	453.758			96.2486
	9	1085.65	858.276	1002.68	783.845	783.158		618.506			9	737.461		676.506		570.965		395.546
	10	1003.23	945.944	1144.72		761.112		652.948			10	694.818	92.541	814.887		455.422		544.762
	11	1058.28	789.345			754.753					11	820.852	96.6999
	12	1040.1						647.934			12	716.109				572.383		494.697
control	sample	SC outgrowth	muscle outgrowth	N =		cyc	sample	SC outgrowth	muscle outgrowth	N =		GANT61	sample	SC outgrowth	muscle outgrowth	N =	GANT+cyc	sample	SC outgrowth	muscle outgrowth	N =
7/27 DMSO ctrl	1			19		7/27 10 µM cyc	1	799.07	116.46	15		7/27 10 µM GANT61	1	983.942	761.083	18	7/27 cyc + GANT61	1	787.957	158.102	13
	2	906.072					2	773.053	170.559				2	1114.62	827.514			2		74.6834
	3	967.717	628.464				3	802.492					3	951.355	643.971			3	662.472	153.268
	4	1129.27	898.302				4	713.984	97.5918				4					4	774.134	178.428
	5	1236.78	963.762				5	799.867	109.679				5	883.838	638.842			5	848.942	135.102
	6	1010.05	834.43				6	629.34	114.886				6	946.247	637.402			6	834.527	99.8046
	7	964.741	703.292				7		99.9918				7	1136.18	726.592			7	846.905	145.111
	8	1000.92	769.202				8	931.314	108.709				8	1024.36	663.272			8	680.033	92.7263
	9	1085.65	737.461				9	858.276					9	1002.68	676.506			9	783.845
	10	1003.23	694.818				10	945.944	92.541				10	1144.72	814.887		8/25 cyc + GANT61	1		91.04
	11	1058.28	820.852				11	789.345	96.6999			8/25 10 µM GANT61	1	713.706	476.671			2	672.335	64.4268
	12	1040.1	716.109			8/25 10 µM cyc	1	688.939	110.354				2	745.467	473.218			3	677.615	81.2207
8/25 DMSO ctrl	1	789.101	391.13				2	720.703	120.112				3	682.573	431.685			4	683.173	66.2716
	2	764.968	402.146				3	736.114	138.951				4	643.973	531.882			5	750.538	90.08
	3	816.135					4	681.445	90.0036				5	755.389	419.308			6	673.814
	4	750.438	467.357				5	669.233	89.3012				6	733.936				7	696.535	78.7234
	5	675.419	519.438				6	713.513	103.865				7	691.653	427.237			8	709.048	96.2486
	6	846.099	516.817				7	726.103	106.384				8	690.365
	7	815.485	378.458										9	618.506	395.546
	8	791.014	453.758										10	652.948	544.762
	9	783.158	570.965										11
	10	761.112	455.422										12	647.934	494.697
	11	754.753
	12		572.383
Gli1MO	SC regen L	4/8 set; 72 hpa no UV	4/8 set; 72 hpa +UV	4/9 set; 72 hpa no UV	4/9 set; 72 hpa +UV	4/9 set; 93 hpa no UV	4/9 set; 93 hpa +UV		muscle regen L	4/8 set; 72 hpa no UV	4/8 set; 72 hpa +UV	4/9 set; 72 hpa no UV	4/9 set; 72 hpa +UV	4/9 set; 93 hpa no UV	4/9 set; 93 hpa +UV
	1	665.518	533.6	763.9	627.315	1001.19	427.212		1		367.745	421.618	382.435	766.302	622.443
	2	744.325	584.474	859.344	484.258	1024.24	897.235		2	470.595	386.18	611.531		814.095	671.437
	3	650.214	619.667	539.889		923.16	915.202		3	368.57	371.201	442.575	365.759	761.652	772.245
	4	804.758	465.468	692.058	581.349	1000.91			4	534.485		486.393	411.382	741.868	647.913
	5	719.531	555.101	781.099	734.884	1008.58	1075.17		5	489.364	445.032	552.33	496.925	839.294
	6	781.669	680.274	873.569	682.658		849.53		6	534.874	444.467	551.779	520.098	711.788	686.548
	7	796.26		755.517	531.19	869.519	400.019		7	547.605	485.495	590.663	538.218	854.583	602.921
	8	630.798	375.189	593.626	600.753	1062.34	953.452		8	415.019	388.582	589.225	627.424	752.029	794.749
	9	694.975		755.139		1043.76	896.775		9	383.131		539.724		706.364	691.277
	10	636.576	596.169			1067.08	974.06		10	532.2	413.862	397.938		825.201	775.721
	11	636.719	411.341	596.931		1065.17			11	680.502	309.92	468.54		812.878
	12		613.342			889.513			12		337.582
Gli2MO	SC regen L	12-2-19 2 pmol no UV	12-2-19 2 pmol +UV	12-2-19 2 pmol no UV	12-2-19 2 pmol +UV	01-15-20 2 pmol no UV	01-15-20 2 pmol +UV		muscle regen L	12-2-19 2 pmol no UV	12-2-19 2 pmol +UV	12-2-19 2 pmol no UV	12-2-19 2 pmol +UV	01-15-20 2 pmol no UV	01-15-20 2 pmol +UV
	1	583.498	493.283	561.305	492.021	591.432	497.312		1	161.667	110.867	315.499	253.76	98.8601	136.575
	2	543.42		555.12	380.303	356.229	352.191		2	312.008	73.3976	303.725	191.378	128.189	98.4962
	3	480.8	519.14	447.424	352.68	615.385	307.593		3	226.1	125.197	211.721	119.74	78.2393	125.286
	4	695.265	571.696	424.195	464.313	499.95	357.284		4	378.608	111.722	168.917	90.2083	90.6995	54.0509
	5		507.426	507.834	439.645	409.053	541.048		5	105.289	111.896	158.494	178.469	51.7831	132.571
	6	589.222	504.55	552.871	259.934	467.923	567.258		6	79.4811	64.2697	199.833	145.473	272.811	138.928
	7	604.683	550.724	341.968	285.813	489.967	299.015		7	78.5873	220.887	141.06		83.3227	169.435
	8	634.912	488.027	422.22	518.574	433.545	356.011		8	218.341	163.867	85.4806	243.856	41.3791	186.944
	9	626.307	593.985	358.089	424.478	480.746	466.915		9	384.298	111.762	236.7	130	63.0283	208.926
	10	607.069	436.315	514.008	348.935		479.551		10	282.853	99.0215	295.683	144.71	142.797	182.906
	11	685.266	496.598	596.601	414.47	377.36	384.496		11	104.03		300.724	198.648
	12	567.861	540.967		323.415	449.52	555.091		12	112.492	117.827	128.756	81.1309	168.053	74.4097
Gli1MO no UV	sample	SC outgrowth	muscle outgrowth	N =		Gli1MO + UV	sample	SC outgrowth	muscle outgrowth	N =		Gli2MO no UV	sample	SC outgrowth	muscle outgrowth	N =	Gli2MO +UV	sample	SC outgrowth	muscle outgrowth	N =
4/8 set; 72 hpa no UV	1	665.518		30		4/8 set; 72 hpa +UV	1	533.6	367.745	23		12-2-19 2 pmol no UV	1	583.498	161.667	32	12-2-19 2 pmol +UV	1	493.283	110.867	32
	2	744.325	470.595				2	584.474	386.18				2	543.42	312.008			2		73.3976
	3	650.214	368.57				3	619.667	371.201				3	480.8	226.1			3	519.14	125.197
	4	804.758	534.485				4	465.468					4	695.265	378.608			4	571.696	111.722
	5	719.531	489.364				5	555.101	445.032				5		105.289			5	507.426	111.896
	6	781.669	534.874				6	680.274	444.467				6	589.222	79.4811			6	504.55	64.2697
	7	796.26	547.605				7		485.495				7	604.683	78.5873			7	550.724	220.887
	8	630.798	415.019				8	375.189	388.582				8	634.912	218.341			8	488.027	163.867
	9	694.975	383.131				9						9	626.307	384.298			9	593.985	111.762
	10	636.576	532.2				10	596.169	413.862				10	607.069	282.853			10	436.315	99.0215
	11	636.719	680.502				11	411.341	309.92				11	685.266	104.03			11	496.598
4/9 set; 72 hpa no UV	1	763.9	421.618				12	613.342	337.582				12	567.861	112.492			12	540.967	117.827
	2	859.344	611.531			4/9 set; 72 hpa +UV	1	627.315	382.435			12-2-19 2 pmol no UV	1	561.305	315.499		12-2-19 2 pmol +UV	1	492.021	253.76
	3	539.889	442.575				2	484.258					2	555.12	303.725			2	380.303	191.378
	4	692.058	486.393				3		365.759				3	447.424	211.721			3	352.68	119.74
	5	781.099	552.33				4	581.349	411.382				4	424.195	168.917			4	464.313	90.2083
	6	873.569	551.779				5	734.884	496.925				5	507.834	158.494			5	439.645	178.469
	7	755.517	590.663				6	682.658	520.098				6	552.871	199.833			6	259.934	145.473
	8	593.626	589.225				7	531.19	538.218				7	341.968	141.06			7	285.813
	9	755.139	539.724				8	600.753	627.424				8	422.22	85.4806			8	518.574	243.856
	10		397.938			4/9 set; 93 hpa +UV	1	427.212	622.443				9	358.089	236.7			9	424.478	130
	11	596.931	468.54				2	897.235	671.437				10	514.008	295.683			10	348.935	144.71
4/9 set; 93 hpa no UV	1	1001.19	766.302				3	915.202	772.245				11	596.601	300.724			11	414.47	198.648
	2	1024.24	814.095				4		647.913				12		128.756			12	323.415	81.1309
	3	923.16	761.652				5	1075.17				01-15-20 2 pmol no UV	1	591.432	98.8601		01-15-20 2 pmol +UV	1	497.312	136.575
	4	1000.91	741.868				6	849.53	686.548				2	356.229	128.189			2	352.191	98.4962
	5	1008.58	839.294				7	400.019	602.921				3	615.385	78.2393			3	307.593	125.286
	6		711.788				8	953.452	794.749				4	499.95	90.6995			4	357.284	54.0509
	7	869.519	854.583				9	896.775	691.277				5	409.053	51.7831			5	541.048	132.571
	8	1062.34	752.029				10	974.06	775.721				6	467.923	272.811			6	567.258	138.928
	9	1043.76	706.364										7	489.967	83.3227			7	299.015	169.435
	10	1067.08	825.201										8	433.545	41.3791			8	356.011	186.944
	11	1065.17	812.878										9	480.746	63.0283			9	466.915	208.926
	12	889.513											10		142.797			10	479.551	182.906
													11	377.36				11	384.496
													12	449.52	168.053			12	555.091	74.4097
	SC regen L	8/25 DMSO	8/25 KT5720	12/19 DMSO	12/19 cyc	12/19 KT5720	12/19 KT + cyc	7-2-19 DMSO	7-2-19 cyc	7-2-19 KT5720	7-2-9 KT5720 + cyc		muscle regen L	8/25 DMSO	8/25 KT5720	12/19 DMSO	12/19 cyc	12/19 KT5720	12/19 KT + cyc	7-2-19 DMSO	7-2-19 cyc	7-2-19 KT5720	7-2-9 KT5720 + cyc
	1		302.843		653.461	729.701	499.969	1082.8	828.09	627.95	451.046		1	277.779	154.2	666.158	75.5298	406.614	78.6003	834.03	81.32	354.83	64.2982
	2	599.481	368.973	975.624	899.747	604.519		1081.45		658.244	470.227		2	377.188	188.35	704.247	77.1764	359.544	112.152	743.85	98.54	512.09	78.6802
	3	653.599	348.366	962.6	772.09		492.321	1020.63	1006.95	636.66	393.349		3	364.635	161.93	676.059	92.7353			772.86	65.96	391.09	48.9662
	4	644.382	390.567	954.353	611.076	744.596	437.188	1047.21		553.81	416.281		4	392.182	217.55	641.211	124.723	455.081	93.8701	750.757		391.06	62.346
	5	559.983	184.362	995.438	720.801	749.008				579.16	513.763		5	393.962	163.42	698.656		433.227	82.4319			378.48	110.607
	6	593.578	380.931	870.068	650.961	673.453	411.456	1047.73			499.163		6	364.073	205.77	682.596	122.33	422.765	67.9124	739.03		396.56	68.5496
	7	623.087	316.903	906.635	749.976	639.385	438.598						7	354.502	199.44	550.35	107.978	307.792
	8	657.169	261.542	934.515	904.976	598.617	496.786						8	370.09	146.39	622.496	104.451	380.352	76.5907
	9	639.299	161.999	904.257	565.057	652.507	491.923						9	357.778	100.68	593.263	76.4551	409.853	129.127
	10	743.229	327.855	862.093	739.674	737.337	433.725						10	423.677	212.95		97.8501	430.895	82.6174
	11	501.905	226.821					1152	1013.63	643.15			11	379.868	84.98					866.42	73.22	426.23
	12	604.72	432.713					1138.97	962.99	707.941	454.055		12	350.416	156.22					851.61	189.45		36.9892
	13	612.928	412.473					1167.72	865.84	717.266	592.861		13	360.529	260.11					904.67	172.37	460.527	62.4755
	14	615.431						1117.63	1137.18	565.755	451.429		14	303.33						879.4	84.35	318.802	64.4102
	15	436.908	507.531					1126.71		616.164			15		339.22					847.69
	16	625.581	313.49					993.83		604.36	410.616		16	339.25	169.57					737.59		475.84	78.4038
	17		334.557										17		173.04
	18		433.509										18		218.1
control	sample	SC outgrowth	muscle outgrowth	N =		cyc	sample	SC outgrowth	muscle outgrowth	N =		KT5720	sample	SC outgrowth	muscle outgrowth	N =	KT5720 + cyc	sample	SC outgrowth	muscle outgrowth	N =
8/25 DMSO	1		277.779	52		12/19 cyc	1	653.461	75.5298	30		8/25 KT5720	1	302.843	154.2	35	12/19 KT + cyc	1	499.969	78.6003	16
	2	599.481	377.188				2	899.747	77.1764				2	368.973	188.35			2		112.152
	3	653.599	364.635				3	772.09	92.7353				3	348.366	161.93			3	492.321
	4	644.382	392.182				4	611.076	124.723				4	390.567	217.55			4	437.188	93.8701
	5	559.983	393.962				5	720.801					5	184.362	163.42			5		82.4319
	6	593.578	364.073				6	650.961	122.33				6	380.931	205.77			6	411.456	67.9124
	7	623.087	354.502				7	749.976	107.978				7	316.903	199.44			7	438.598
	8	657.169	370.09				8	904.976	104.451				8	261.542	146.39			8	496.786	76.5907
	9	639.299	357.778				9	565.057	76.4551				9	161.999	100.68			9	491.923	129.127
	10	743.229	423.677				10	739.674	97.8501				10	327.855	212.95			10	433.725	82.6174
	11	501.905	379.868			7-2-19 cyc	1	828.09	81.32				11	226.821	84.98		7-2-9 KT5720 + cyc	1	451.046	64.2982
	12	604.72	350.416				2		98.54				12	432.713	156.22			2	470.227	78.6802
	13	612.928	360.529				3	1006.95	65.96				13	412.473	260.11			3	393.349	48.9662
	14	615.431	303.33				4						14					4	416.281	62.346
	15	436.908					5						15	507.531	339.22			5	513.763	110.607
	16	625.581	339.25				6						16	313.49	169.57			6	499.163	68.5496
12/19 DMSO	1		666.158				7						17	334.557	173.04			7
	2	975.624	704.247				8						18	433.509	218.1			8
	3	962.6	676.059				9					12/19 KT5720	1	729.701	406.614			9
	4	954.353	641.211				10						2	604.519	359.544			10
	5	995.438	698.656				11	1013.63	73.22				3					11
	6	870.068	682.596				12	962.99	189.45				4	744.596	455.081			12	454.055	36.9892
	7	906.635	550.35				13	865.84	172.37				5	749.008	433.227			13	592.861	62.4755
	8	934.515	622.496				14	1137.18	84.35				6	673.453	422.765			14	451.429	64.4102
	9	904.257	593.263			7/27 10 µM cyc	1	799.07	116.46				7	639.385	307.792			15
	10	862.093					2	773.053	170.559				8	598.617	380.352			16	410.616	78.4038
7-2-19 DMSO	1	1082.8	834.03				3	802.492					9	652.507	409.853
	2	1081.45	743.85				4	713.984	97.5918				10	737.337	430.895
	3	1020.63	772.86				5	799.867	109.679			7-2-19 KT5720	1	627.95	354.83
	4	1047.21	750.757				6	629.34	114.886				2	658.244	512.09
	5						7		99.9918				3	636.66	391.09
	6	1047.73	739.03				8	931.314	108.709				4	553.81	391.06
	7						9	858.276					5	579.16	378.48
	8						10	945.944	92.541				6		396.56
	9						11	789.345	96.6999				7
	10					8/25 10 µM cyc	1	688.939	110.354				8
	11	1152	866.42				2	720.703	120.112				9
	12	1138.97	851.61				3	736.114	138.951				10
	13	1167.72	904.67				4	681.445	90.0036				11	643.15	426.23
	14	1117.63	879.4				5	669.233	89.3012				12	707.941
	15	1126.71	847.69				6	713.513	103.865				13	717.266	460.527
	16	993.83	737.59				7	726.103	106.384				14	565.755	318.802
7/27 DMSO ctrl	1												15	616.164
	2	906.072											16	604.36	475.84
	3	967.717	628.464
	4	1129.27	898.302
	5	1236.78	963.762
	6	1010.05	834.43
	7	964.741	703.292
	8	1000.92	769.202
	9	1085.65	737.461
	10	1003.23	694.818
	11	1058.28	820.852
	12	1040.1	716.109
8/25 DMSO ctrl	1	789.101	391.13
	2	764.968	402.146
	3	816.135
	4	750.438	467.357
	5	675.419	519.438
	6	846.099	516.817
	7	815.485	378.458
	8	791.014	453.758
	9	783.158	570.965
	10	761.112	455.422
	11	754.753
	12		572.383
